# Supplementary material
Source: PubMed Central journal article supplement (PMC10999230)
Supplement: NIHMS1970095-supplement-Supplemental_Information.pdf [file NIHMS1970095-supplement-Supplemental_Information.pdf]

|                                                                                                                                                             |    |
|-------------------------------------------------------------------------------------------------------------------------------------------------------------|----|
| Supplementary Scheme 1: Conventional peptide thioester synthesis at the sulfonamide “safety-catch” resin ...                                                | 4  |
| Supplementary Scheme 2: Conventional peptide thioester synthesis at the NDbz “safety-catch” resin.....                                                      | 4  |
| Peptide Thioesters Used in This Study .....                                                                                                                 | 4  |
| Supplementary Table 1: Ulm16 total turnover assays. ....                                                                                                    | 38 |
| Supplementary Table 2: Ulm16 Mutant total turnover assays .....                                                                                             | 39 |
| Supplementary Table 3: Crystallography Table .....                                                                                                          | 40 |
| Supplementary Table 4: Primers used for site directed mutagenesis.....                                                                                      | 41 |
| Supplementary Fig. 1: Multiple sequence alignment of predicted and validated PBP-TEs.....                                                                   | 42 |
| Supplementary Fig. 2 Phylogenetic tree of PBP-TEs.....                                                                                                      | 43 |
| Supplementary Fig. 3: Zoom in of Phylogenetic tree the PBP-TEs .....                                                                                        | 43 |
| Supplementary Fig. 5: UPLC UV trace (214 nm) for the total turnover number (TTN) assay of Ulm16 with Ulm-SMMP (2).....                                      | 45 |
| Supplementary Fig. 6: UPLC UV trace (214 nm) for the total turnover number (TTN) assay of Ulm16 with Ulm-SMMP where L-Orn replaced by L-Gln (6).....        | 45 |
| Supplementary Fig. 7: In vitro reaction of Ulm16 with Ulm-SBMP (3). ....                                                                                    | 46 |
| Supplementary Fig. 8: In vitro reaction of Ulm16 with Ulm-SBMP where D-Gln was replaced by L-Gln (4).....                                                   | 46 |
| Supplementary Fig. 9: <i>In vitro</i> reaction of Ulm16 with Ulm-SBMP where D-Gln was replaced by D-Ala (5) .....                                           | 47 |
| Supplementary Fig. 10: <i>In vitro</i> reaction of Ulm16 with Ulm-SBMP where L-Ile was replaced by L-Ala (7) .....                                          | 47 |
| Supplementary Fig. 11: <i>In vitro</i> reaction of Ulm16 with Ulm-SBMP where D-Leu was replaced by D-Ala (8)...                                             | 48 |
| Supplementary Fig. 12: <i>In vitro</i> reaction of Ulm16 with Ulm-SBMP where D-Val was replaced by D-Ala (9)....                                            | 48 |
| Supplementary Fig. 13: <i>In vitro</i> reaction of Ulm16 with Ulm-SBMP where L-Trp was replaced by L-Ala (10)...                                            | 49 |
| Supplementary Fig. 14: The UPLC UV trace (214 nm) displays the total turnover number (TTN) assay results of Ulm16 with substrate 11 .....                   | 49 |
| Supplementary Fig. 15: The UPLC UV trace (214 nm) displays the total turnover number (TTN) assay results of Ulm16 with substrate 12-SNAC .....              | 50 |
| Supplementary Fig. 16: The UPLC UV trace (214 nm) displays the total turnover number (TTN) assay results of Ulm16 with substrate 12-SMMP .....              | 50 |
| Supplementary Fig. 17: The UPLC UV trace (214 nm) displays the total turnover number (TTN) assay results of SurE with substrate 12-SNAC.....                | 51 |
| Supplementary Fig. 18: UPLC UV trace (214 nm) is shown for the total turnover number (TTN) assay of Ulm16 with a substrate of a known PBP-TE PenA (13)..... | 52 |
| Supplementary Fig. 19: UPLC UV trace (214 nm) is shown for the total turnover number (TTN) assay of SurE with a substrate of a known PBP-TE PenA (13).....  | 52 |
| Supplementary Fig. 20: UPLC UV trace (214 nm) is shown for the total turnover number (TTN) assay of Ulm16 with tetrapeptide substrate 14.....               | 52 |
| Supplementary Fig. 21: Spiking with synthetic standard to confirm cyclic tetrapeptide .....                                                                 | 53 |
| Supplementary Fig. 22: UPLC UV trace (214 nm) is shown for the total turnover number (TTN) assay of Ulm16 with tetrapeptide substrate 15.....               | 53 |
| Supplementary Fig. 23: UPLC UV trace (214 nm) is shown for the total turnover number (TTN) assay of Ulm16 with tetrapeptide substrate 16.....               | 54 |

|                                                                                                                                                      |    |
|------------------------------------------------------------------------------------------------------------------------------------------------------|----|
| Supplementary Fig. 24: Spiking with synthetic standard to confirm cyclic tetrapeptide .....                                                          | 54 |
| Supplementary Fig. 25: UPLC UV trace (214 nm) is shown for the total turnover number (TTN) assay of Ulm16 with tetrapeptide substrate 17.....        | 55 |
| Supplementary Fig. 26: UPLC UV trace (214 nm) is shown for the total turnover number (TTN) assay of Ulm16 with tetrapeptide substrate 18.....        | 55 |
| Supplementary Fig. 27: UPLC UV trace (214 nm) is shown for the total turnover number (TTN) assay of Ulm16 with tetrapeptide substrates 19.....       | 56 |
| Supplementary Fig. 28: UPLC UV trace (214 nm) for the total turnover number (TTN) assay of Ulm16 with tetrapeptide substrates 20.....                | 57 |
| Supplementary Fig. 29: UPLC UV trace (214 nm) for the total turnover number (TTN) assay of Ulm16 with tetrapeptide substrates 21.....                | 57 |
| Supplementary Fig. 30: UPLC UV trace (214 nm) for the total turnover number (TTN) assay of Ulm16 with tetrapeptide substrates 22.....                | 57 |
| Supplementary Fig. 31: UPLC UV trace (214 nm) for the total turnover number (TTN) assay of Ulm16 with tetrapeptide substrates 23 .....               | 58 |
| Supplementary Fig. 32: UPLC UV trace (214 nm) for the total turnover number (TTN) assay of Ulm16 with tetrapeptide substrates 24 .....               | 58 |
| Supplementary Fig. 34: UPLC UV trace (214 nm) for the total turnover number (TTN) assay of Ulm16 with tetrapeptide substrates 26.....                | 59 |
| Supplementary Fig. 35: UPLC UV trace (214 nm) for the total turnover number (TTN) assay of Ulm16 with tetrapeptide substrates 27.....                | 60 |
| Supplementary Fig. 36: UPLC UV trace (214 nm) for the total turnover number (TTN) assay of Ulm16 with tetrapeptide substrates 28.....                | 60 |
| Supplementary Fig. 39: UPLC UV trace (214 nm) for the total turnover number (TTN) assay of Ulm16 with tetrapeptide substrates 31 .....               | 62 |
| .....                                                                                                                                                | 62 |
| Supplementary Fig. 40: Expression of Ulm16 and SurE.....                                                                                             | 62 |
| Supplementary Fig. 41: Covalent docking of tetrapeptides to the Ulm16 crystal structure .....                                                        | 63 |
| Supplementary Fig. 42: Covalent docking of hexapeptides to the Ulm16 crystal structure.....                                                          | 64 |
| Supplementary Fig. 43: Residues mutated in SDM studies .....                                                                                         | 65 |
| Supplementary Fig. 44. Purification gels for GST tagged Ulm16 FL, Ulm16 FL mutants, and Ulm16 12-440...                                              | 66 |
| Supplementary Fig. 45. UPLC UV trace (214 nm) is shown for the total turnover number (TTN) assay of Ulm16 mutant reactions with peptide 12-MMP ..... | 67 |
| Supplementary Fig. 46. UPLC UV trace (214 nm) is shown for the total turnover number (TTN) assay of Ulm16 mutant reactions with peptide 14 .....     | 67 |
| Supplementary Fig. 47. UPLC UV trace (214 nm) is shown for the total turnover number (TTN) assay of Ulm16 mutant reactions with peptide 16 .....     | 68 |
| Supplementary Fig. 48. UPLC UV trace (214 nm) is shown for the total turnover number (TTN) assay of Ulm16 mutant reactions with peptide 29 .....     | 69 |
| Supplementary Fig. 49. UPLC UV trace (214 nm) is shown for the total turnover number (TTN) assay of Ulm16 mutant reactions with peptide 30 .....     | 69 |

|                                                                                                                                                                 |        |
|-----------------------------------------------------------------------------------------------------------------------------------------------------------------|--------|
| Supplementary Fig. 50: UPLC UV trace (214 nm) is shown for the total turnover number (TTN) assay of Ulm16 <sup>D297N</sup> mutant reaction with peptide 19..... | 70     |
| Supplementary note 1: Gene sequence for Ulm16 .....                                                                                                             | 70     |
| Supplementary note 2: Gene sequence for SurE.....                                                                                                               | 71     |
| Supplementary Fig. 51: MS2 spectrum for.....                                                                                                                    | 72     |
| Supplementary Fig. 52: MS2 spectrum for.....                                                                                                                    | 74     |
| Supplementary Fig. 53: MS2 spectrum for Cyclic Peptide 6 (Cyc 6) .....                                                                                          | 75     |
| Supplementary Fig. 54: MS2 spectrum for Cyclic Peptide 7 (Cyc 7) .....                                                                                          | 75     |
| Supplementary Fig. 55: MS2 spectrum for Cyclic Peptide 8 (Cyc 8) .....                                                                                          | 77     |
| Supplementary Fig. 56: MS2 spectrum for Cyclic peptide 9 (Cyc 9).....                                                                                           | 78     |
| Supplementary Fig. 57: MS2 spectrum for Cyclic Peptide 10 (Cyc 10) .....                                                                                        | 79     |
| Supplementary Fig. 58: MS2 spectrum for Cyclic Peptide 11 (Cyc11) .....                                                                                         | 80     |
| Supplementary Fig. 59: MS2 spectrum for Cyclic Peptide 12 (Cyc12) .....                                                                                         | 81     |
| Supplementary Fig. 60: MS2 spectrum for Cyclic Peptide 13 (Cyc13) .....                                                                                         | 82     |
| Supplementary Fig. 61: MS2 spectrum for Cyclic Peptide 14 (Cyc14) .....                                                                                         | 83     |
| Supplementary Fig. 62: MS2 spectrum for Cyclic Peptide 15 (Cyc15) .....                                                                                         | 84     |
| Supplementary Fig. 63: MS2 spectrum for Cyclic Peptide 16 (Cyc16) .....                                                                                         | 85     |
| Supplementary Fig. 64: MS2 spectrum for Cyclic Peptide 17 (Cyc17) .....                                                                                         | 86     |
| Supplementary Fig. 66: MS2 spectrum for Cyclic Peptide 20 (Cyc20) .....                                                                                         | 88     |
| Supplementary Fig. 67: MS2 spectrum for Cyclic Peptide 21 (Cyc21) .....                                                                                         | 89     |
| Supplementary Fig. 68: MS2 spectrum for Cyclic Peptide 22 (Cyc22) .....                                                                                         | 90     |
| Supplementary Fig. 69: MS2 spectrum for Cyclic Peptide 23 (Cyc23) .....                                                                                         | 91     |
| Supplementary Fig. 70: MS2 spectrum for Cyclic Peptide 24 (Cyc24) .....                                                                                         | 92     |
| Supplementary Fig. 71: MS2 spectrum for Cyclic Peptide 25 (Cyc25) .....                                                                                         | 93     |
| Supplementary Fig. 72: MS2 spectrum for Cyclic Peptide 26 (Cyc26) .....                                                                                         | 94     |
| Supplementary Fig. 73: MS2 spectrum for Cyclic Peptide 27 (Cyc27) .....                                                                                         | 95     |
| Supplementary Fig. 74: MS2 spectrum for Cyclic Peptide 28 (Cyc28) .....                                                                                         | 96     |
| Supplementary Fig. 75: MS2 spectrum for Cyclic Peptide 29 (Cyc29) .....                                                                                         | 97     |
| Supplementary Fig. 76: MS2 spectrum for Cyclic Peptide 30 (Cyc30) .....                                                                                         | 98     |
| Supplementary Fig. 77-106: NMR Spectra .....                                                                                                                    | 99-130 |
| Supplementary References .....                                                                                                                                  | 131    |

## Supplementary Methods

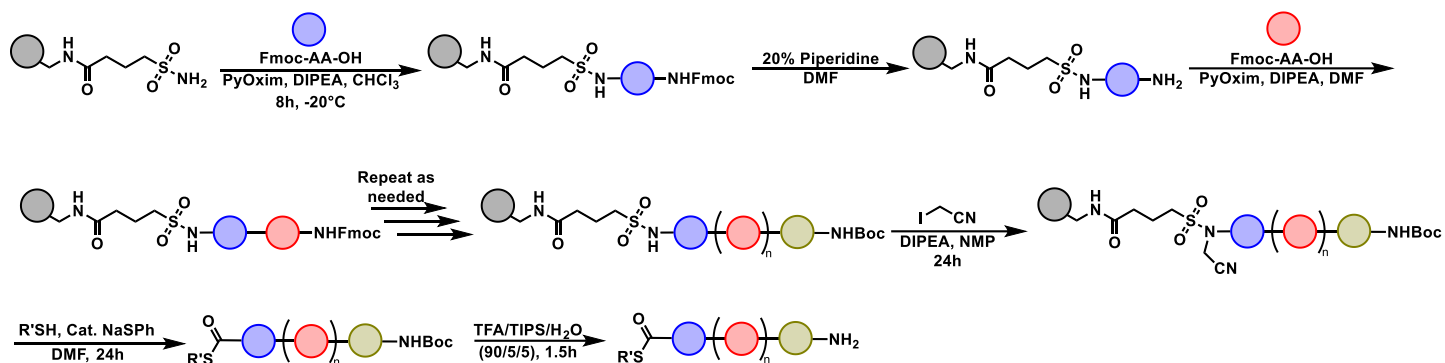

## Supplementary Scheme 1: Conventional peptide thioester synthesis at the sulfonamide “safety-catch” resin

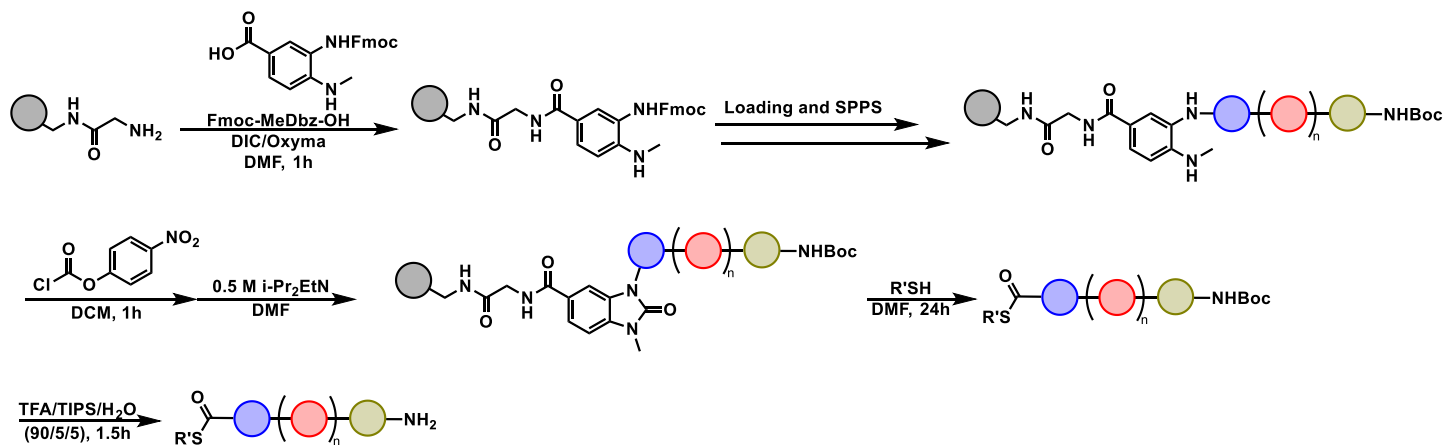

## Supplementary Scheme 2: Conventional peptide thioester synthesis at the NDbz “safety-catch” resin

### Peptide Thioesters Used in This Study

In this study, UPLC and/or analytical HPLC were utilized to assess the purity of the peptide prior to assay or purification by monitoring absorbance at 214 nm. The analytical HPLC analysis was performed on a Luna Omega 5  $\mu$ m Polar C18 100 Å 150x4.6 mm (Phenomenex) column, while the UPLC analysis was carried out on a CORTECS T3 Column, 120Å, 1.6  $\mu$ m, 2.1 mm X 50 mm (Waters) column. For purification, semi-preparative HPLC was employed using a Luna Omega 5  $\mu$ m Polar C18 100 Å 150x21.2 mm (Phenomenex) column. The specific gradient and flow rate for each peptide can be found in their respective sections.

### Synthesis of 1

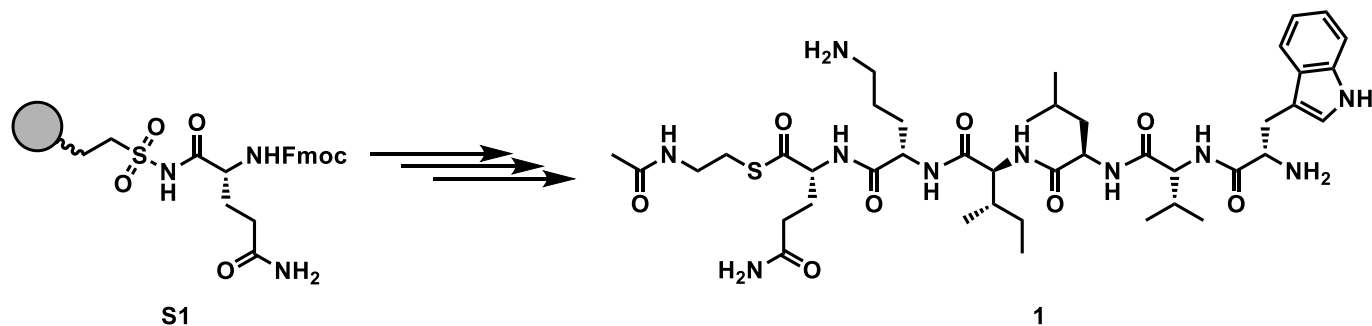

Peptide 1 was synthesized following the general protocol outlined above for the sulfonamide “safety-catch” resin. The synthesis was initiated from 4-sulfamylbutyryl resin preloaded with Fmoc-D-Gln(Trt)-OH **S1** (0.05 mmol)

using the following amino acids (Fmoc-L-Orn(Boc)-OH, Fmoc-L-Ile-OH, Fmoc-D-Leu-OH, Fmoc-D-Val-OH, Boc-L-Trp(Boc)-OH) and N-Acetylcysteamine as the cleaving thiol. The obtained crude peptide was obtained as an off white solid (30.3 mg, 55% yield) analyzed via RP-UPLC and was used in further enzyme assays without further purification.

**<sup>1</sup>H NMR** (800 MHz, DMSO)  $\delta$  11.03 (s, 1H), 8.64 (q,  $J = 6.8$  Hz, 2H), 8.20 (dd,  $J = 8.2, 8.2$  Hz, 2H), 8.07 (t,  $J = 6.1$  Hz, 1H), 7.91 – 7.68 (m, 6H), 7.36 (d,  $J = 7.5$  Hz, 1H), 7.27 (s, 1H), 7.23 (s, 1H), 7.09 (t,  $J = 7.5$  Hz, 1H), 7.01 (t,  $J = 8.2$  Hz, 1H), 6.81 (s, 1H), 4.40 (p,  $J = 5.4$  Hz, 2H), 4.34 – 4.26 (m, 2H), 4.23 (t,  $J = 7.5$  Hz, 1H), 4.15 (t,  $J = 5.6$  Hz, 1H), 3.31 (q,  $J = 8.2$  Hz, 1H), 3.25 (dd,  $J = 6.8, 5.4$  Hz, 1H), 3.11 (q,  $J = 7.0$  Hz, 2H), 3.02 (q,  $J = 9.6$  Hz, 1H), 2.87 – 2.73 (m, 4H), 2.17 – 2.05 (m, 2H), 1.97 (h,  $J = 6.1$  Hz, 1H), 1.92 (h,  $J = 5.4$  Hz, 1H), 1.82 – 1.65 (m, 7H), 1.62 – 1.49 (m, 4H), 1.46 (t,  $J = 4.9$  Hz, 2H), 1.42 – 1.35 (m, 1H), 1.05 (hept,  $J = 6.1$  Hz, 1H), 0.87 (d,  $J = 7.5$  Hz, 3H), 0.83 (d,  $J = 6.8$  Hz, 3H), 0.79 (d,  $J = 5.6$  Hz, 3H), 0.78 – 0.71 (m, 9H).

**<sup>13</sup>C NMR** (201 MHz, DMSO)  $\delta$  200.6, 173.2, 171.7, 171.6, 170.8, 170.4, 169.3, 136.3, 127.1, 124.9, 121.1, 118.7, 118.3, 111.4, 107.2, 58.7, 57.6, 56.5, 52.8, 51.7, 51.2, 42.2, 41.1, 38.5, 38.1, 38.0, 37.3, 36.8, 30.9, 30.9, 29.1, 28.3, 27.6, 27.0, 24.2, 24.1, 23.5, 23.0, 22.6, 22.5, 21.5, 19.1, 17.8, 15.3, 10.9.

**Mass spec:** expected neutral mass for C<sub>42</sub>H<sub>68</sub>N<sub>10</sub>O<sub>8</sub>S (Da): 872.4942, observed neutral mass (Da): 872.4967, mass error (ppm) 2.8.

**UPLC Trace:** Obtained using mobile phases of H<sub>2</sub>O+0.1% formic acid (A) and acetonitrile+0.1% formic acid (B). Samples were eluted using a gradient mode with mobile phase B ranging from 0% to 40% over 11 minutes at a flow rate of 0.5 mL/min. The column was equilibrated with 0% mobile phase B for 1 minute before and after the gradient. The crude peptide purity was determined to be 96%

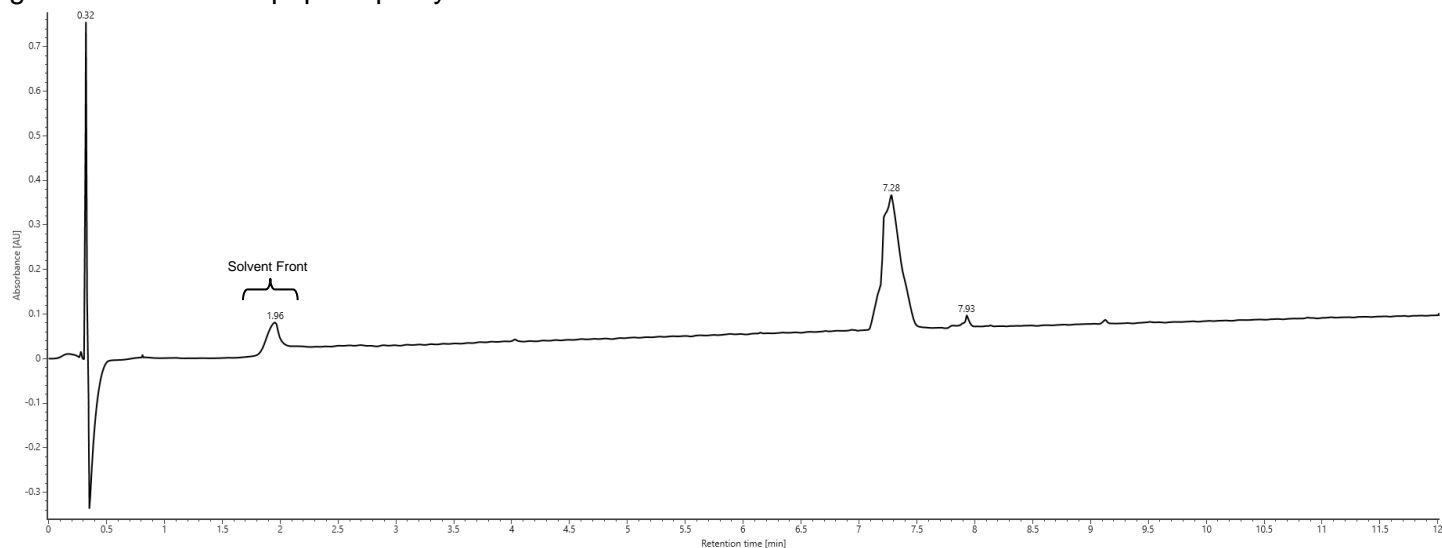

## Synthesis of 2

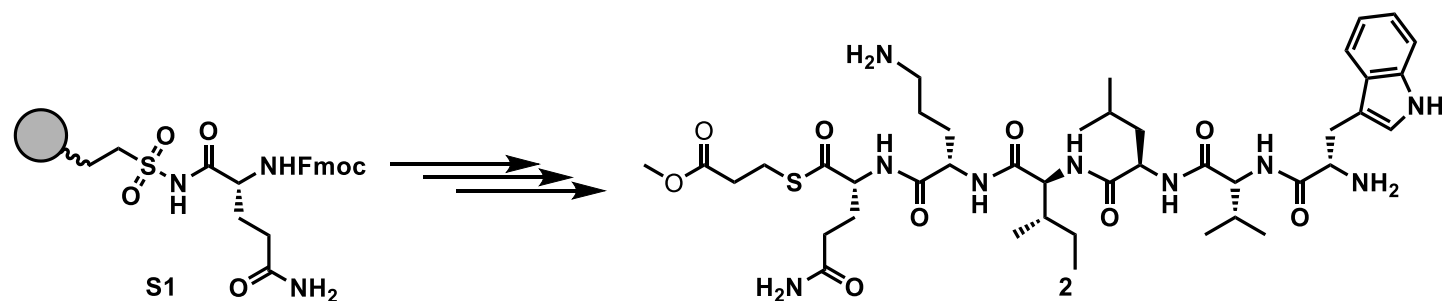

Peptide **2** was synthesized following the general protocol outlined above for the sulfonamide “safety-catch” resin. The synthesis was initiated from 4-sulfamylbutyryl resin preloaded with Fmoc-D-Gln(Trt)-OH **S1** (0.05 mmol) using the following amino acids (Fmoc-L-Orn(Boc)-OH, Fmoc-L-Ile-OH, Fmoc-D-Leu-OH, Fmoc-D-Val-OH, Boc-L-Trp(Boc)-OH) and methyl 3-mercaptopropionate as the cleaving thiol. The obtained crude peptide was obtained as an off white solid (27.2 mg, 49% yield) analyzed via RP-UPLC and was used in further enzyme assays without further purification.

**$^1\text{H NMR}$**  (800 MHz, DMSO)  $\delta$  11.03 (s, 1H), 8.64 (dd,  $J = 335.2, 4.7$  Hz, 2H), 8.20 (dd,  $J = 9.1, 9.1$  Hz, 2H), 7.83 (d,  $J = 9.1$  Hz, 2H), 7.74 (d,  $J = 9.1$  Hz, 6H), 7.34 (d,  $J = 7.5$  Hz, 1H), 7.26 (d,  $J = 24.4$  Hz, 2H), 7.09 (t,  $J = 7.5$  Hz, 1H), 7.00 (t,  $J = 6.3$  Hz, 1H), 6.81 (s, 1H), 4.40 (p,  $J = 7.9$  Hz, 2H), 4.33 – 4.26 (m, 2H), 4.24 (t,  $J = 7.5$  Hz, 1H), 4.14 (t,  $J = 9.1$  Hz, 1H), 3.60 (s, 4H), 3.24 (dd,  $J = 6.3, 5.9$  Hz, 1H), 3.04 – 2.92 (m, 4H), 2.79 (t,  $J = 9.4$  Hz, 2H), 2.56 (q,  $J = 5.9$  Hz, 2H), 2.11 (h,  $J = 5.9$  Hz, 2H), 1.99 – 1.89 (m, 2H), 1.77 – 1.66 (m, 4H), 1.61 – 1.50 (m, 5H), 1.46 (t,  $J = 7.5$  Hz, 3H), 1.42 – 1.35 (m, 1H), 1.05 (h,  $J = 4.7$  Hz, 1H), 0.90 – 0.69 (m, 24H).

**$^{13}\text{C NMR}$**  (201 MHz, DMSO)  $\delta$  200.6, 173.1, 171.7, 171.6, 171.6, 170.8, 170.4, 136.4, 127.1, 124.9, 121.1, 118.7, 118.3, 111.4, 107.3, 58.6, 57.6, 56.5, 52.8, 51.7, 51.6, 51.2, 41.1, 38.5, 36.8, 33.5, 30.9, 30.8, 29.1, 28.3, 26.9, 24.2, 24.1, 23.5, 23.2, 23.0, 21.5, 19.1, 17.8, 15.3, 10.9.

**Mass spec:** expected neutral mass for  $\text{C}_{42}\text{H}_{67}\text{N}_9\text{O}_9\text{S}$  (Da): 873.4782, observed neutral mass (Da): 873.4809, mass error (ppm) 3.1.

**UPLC Trace:** Obtained using mobile phases of  $\text{H}_2\text{O}+0.1\%$  formic acid (A) and acetonitrile+0.1% formic acid (B). Samples were eluted using a gradient mode with mobile phase B ranging from 0% to 40% over 11 minutes at a flow rate of 0.5 ml/min. The column was equilibrated with 0% mobile phase B for 1 minute before and after the gradient. The crude peptide purity was determined to be 97%.

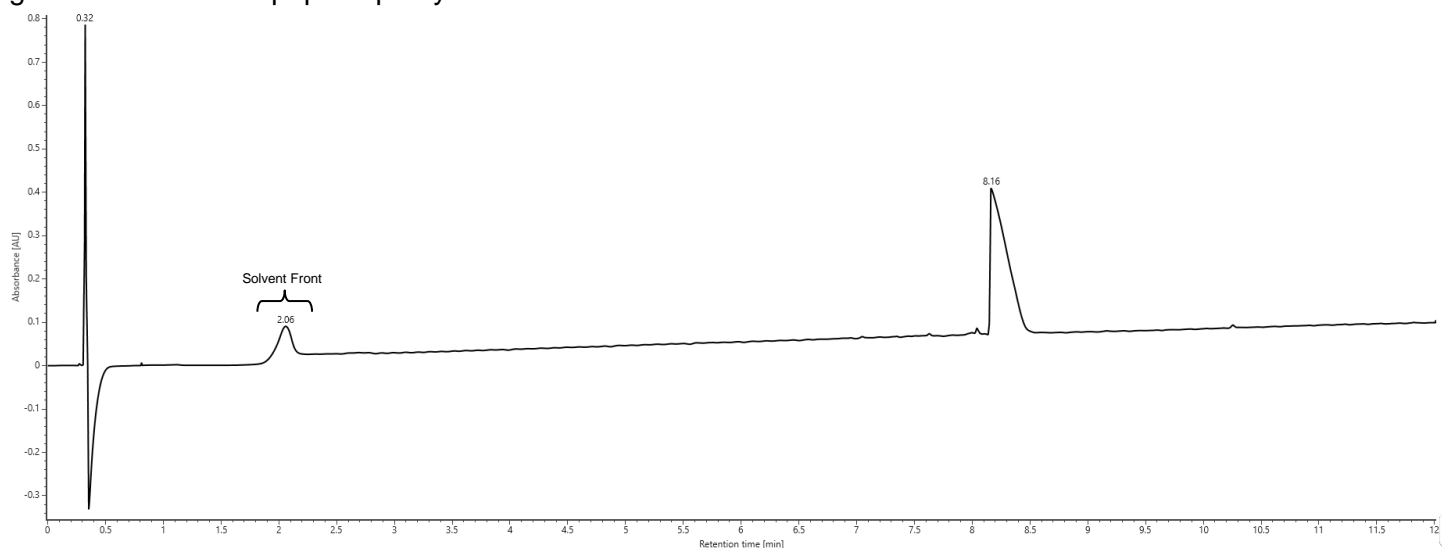

### Synthesis of **3**

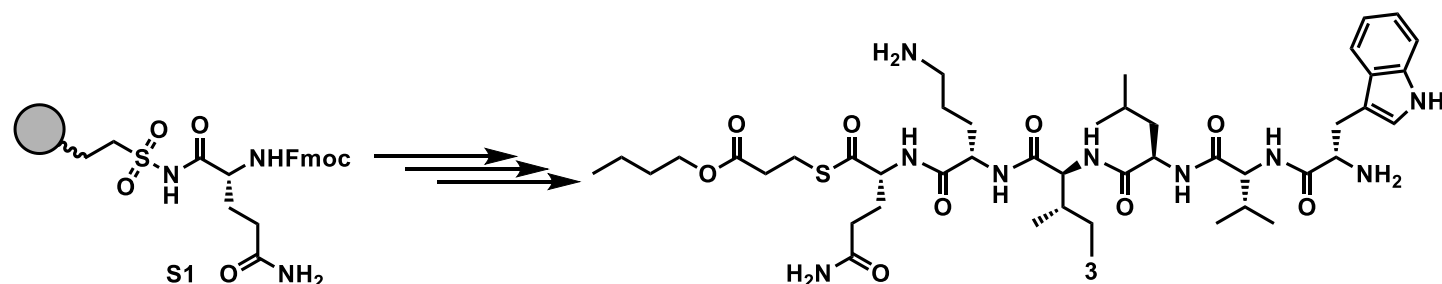

Peptide **3** was synthesized following the general protocol outlined above for the sulfonamide “safety-catch” resin. The synthesis was initiated from 4-sulfamylbutyryl resin preloaded with Fmoc-D-Gln(Trt)-OH **S1** (0.05 mmol) using the following amino acids (Fmoc-L-Orn(Boc)-OH, Fmoc-L-Ile-OH, Fmoc-D-Leu-OH, Fmoc-D-Val-OH, Boc-L-Trp(Boc)-OH) and butyl 3-mercaptopropionate as the cleaving thiol. The obtained crude peptide was obtained as an off white solid (22.3 mg, 39% yield) analyzed via RP-UPLC and was used in further enzyme assays without further purification.

**$^1\text{H NMR}$**  (800 MHz, DMSO)  $\delta$  10.87 (s, 1H), 8.66 (d,  $J = 8.4$  Hz, 1H), 8.45 (s, 1H), 8.20 (dd,  $J = 6.2, 4.3$  Hz, 3H), 7.98 (d,  $J = 7.3$  Hz, 1H), 7.56 (d,  $J = 7.3$  Hz, 1H), 7.38 (s, 1H), 7.33 (d,  $J = 7.3$  Hz, 1H), 7.17 (s, 1H), 7.05 (t,  $J = 6.5$  Hz, 1H), 6.97 (t,  $J = 6.2$  Hz, 1H), 6.77 (s, 1H), 4.41 – 4.33 (m, 2H), 4.31 – 4.25 (m, 1H), 4.20 (t,  $J = 8.6$  Hz, 1H), 4.14 (t,  $J = 6.5$  Hz, 1H), 4.02 (t,  $J = 6.5$  Hz, 2H), 3.60 (t,  $J = 5.4$  Hz, 1H), 3.10 (dd,  $J = 6.5, 5.4$  Hz, 1H), 3.00 – 2.90 (m, 2H), 2.74 – 2.65 (m, 3H), 2.54 (dd,  $J = 962.0, 6.2$  Hz, 2H), 2.16 – 2.06 (m, 2H), 2.00 – 1.92 (m, 2H),

1.79 – 1.67 (m, 3H), 1.61 – 1.43 (m, 9H), 1.42 – 1.35 (m, 1H), 1.31 (dd,  $J = 181.8, 7.5$  Hz, 2H), 1.07 (p,  $J = 8.4$  Hz, 1H), 0.88 (t,  $J = 7.3$  Hz, 7H), 0.83 (d,  $J = 7.3$  Hz, 4H), 0.79 (q,  $J = 6.5$  Hz, 8H), 0.77 (t,  $J = 2.2$  Hz, 6H).

$^{13}\text{C}$  NMR (201 MHz, DMSO)  $\delta$  201.15, 174.93, 173.48, 172.19, 171.49, 171.38, 171.21, 166.30, 136.66, 127.70, 124.16, 121.25, 118.82, 118.57, 111.70, 111.01, 70.17, 64.29, 59.08, 58.02, 57.04, 55.46, 52.10, 51.66, 41.26, 39.00, 36.73, 34.02, 31.23, 30.91, 30.51, 29.59, 27.27, 24.62, 23.62, 23.37, 21.89, 19.61, 18.98, 18.41, 15.74, 13.94, 11.24.

**Mass spec:** expected neutral mass for  $\text{C}_{45}\text{H}_{73}\text{N}_9\text{O}_9\text{S}$  (Da): 915.5250, observed neutral mass (Da): 915.5249, mass error (ppm) 0.3.

**UPLC Trace:** Obtained using mobile phases of  $\text{H}_2\text{O}+0.1\%$  formic acid (A) and acetonitrile+0.1% formic acid (B). Samples were eluted using a gradient mode with mobile phase B ranging from 0% to 40% over 11 minutes at a flow rate of 0.5 ml/min. The column was equilibrated with 0% mobile phase B for 1 minute before and after the gradient. The crude peptide purity was determined to be 99%.

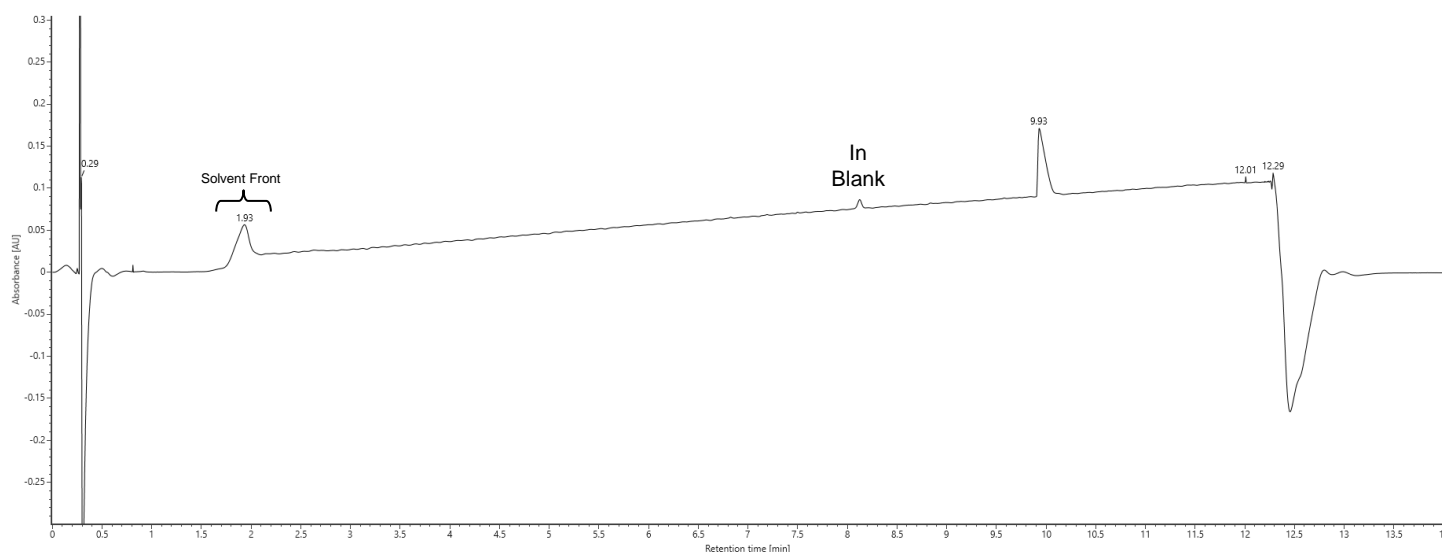

## Synthesis of 4

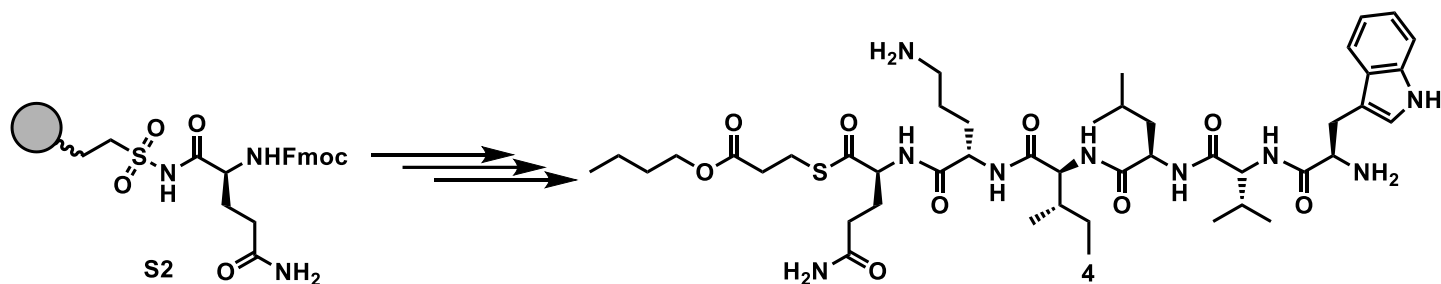

Peptide **4** was synthesized using the sulfonamide "safety-catch" resin following the general protocol described earlier. The synthesis was started from 4-sulfamylbutyryl resin preloaded with Fmoc-L-Gln(Trt)-OH **S2** (0.05 mmol) and utilized the following amino acids: Fmoc-L-Orn(Boc)-OH, Fmoc-L-Ile-OH, Fmoc-D-Leu-OH, Fmoc-D-Val-OH, and Boc-D-Trp-OH, with Butyl 3-mercaptopropionate as the cleaving thiol. The crude peptide was purified via reverse-phase semi-preparative HPLC using mobile phases of  $\text{H}_2\text{O}+0.1\%$  formic acid (A) and acetonitrile+0.1% formic acid (B). Samples were eluted using a gradient mode with mobile phase B ranging from 0% to 55% over 22 minutes at a flow rate of 20 mL/min. The column was equilibrated with 0% mobile phase B for 1 minute before and 5 minutes after the gradient to yield an off-white solid (8.1 mg, 16% yield).

$^1\text{H}$  NMR (800 MHz, DMSO)  $\delta$  10.91 (s, 1H), 8.72 (s, 1H), 8.45 (s, 2H), 8.34 – 7.97 (m, 6H), 7.56 (s, 1H), 7.33 (s, 3H), 7.19 (s, 2H), 7.06 (d,  $J = 8.0$  Hz, 1H), 6.97 (d,  $J = 6.9$  Hz, 2H), 6.78 (s, 1H), 6.16 (t,  $J = 56.3$  Hz, 2H), 4.33

(d,  $J = 42.5$  Hz, 5H), 4.20 (dd,  $J = 136.6, 17.8$  Hz, 4H), 4.02 (d,  $J = 5.7$  Hz, 3H), 3.60 – 3.43 (m, 2H), 3.17 – 3.02 (m, 1H), 2.97 (d,  $J = 6.3$  Hz, 3H), 2.74 (d,  $J = 6.9$  Hz, 5H), 2.55 (d,  $J = 7.5$  Hz, 3H), 2.13 (d,  $J = 7.7$  Hz, 3H), 1.95 (s, 3H), 1.87 – 1.67 (m, 5H), 1.66 – 1.17 (m, 29H), 1.06 (s, 1H), 0.94 – 0.58 (m, 42H).

$^{13}\text{C}$  NMR (201 MHz, DMSO)  $\delta$  200.8, 174.1, 173.2, 171.8, 171.7, 171.2, 171.0, 171.0, 166.0, 136.3, 118.2, 117.4, 116.2, 115.0, 111.3, 110.4, 63.9, 58.8, 57.2, 56.6, 55.1, 51.6, 51.4, 40.8, 38.2, 36.3, 33.6, 31.0, 30.8, 30.6, 30.1, 28.4, 27.1, 24.3, 24.2, 23.9, 23.2, 22.9, 21.5, 20.5, 20.4, 20.2, 19.2, 18.6, 17.9, 15.4, 13.5, 10.8.

**Mass spec:** expected neutral mass for  $\text{C}_{45}\text{H}_{73}\text{N}_9\text{O}_9\text{S}$  (Da): 915.5251, observed neutral mass (Da): 915.5215, mass error (ppm) 6.0.

**HPLC Trace** Obtained using mobile phases of  $\text{H}_2\text{O}+0.1\%$  formic acid (A) and acetonitrile+0.1% formic acid (B). Samples were eluted using a gradient mode with mobile phase B ranging from 0% to 50% over 22 minutes at a flow rate of 1 ml/min. The column was equilibrated with 0% mobile phase B for 3 minutes before and 5 minutes after the gradient. The peptide purity was determined to be 99%.

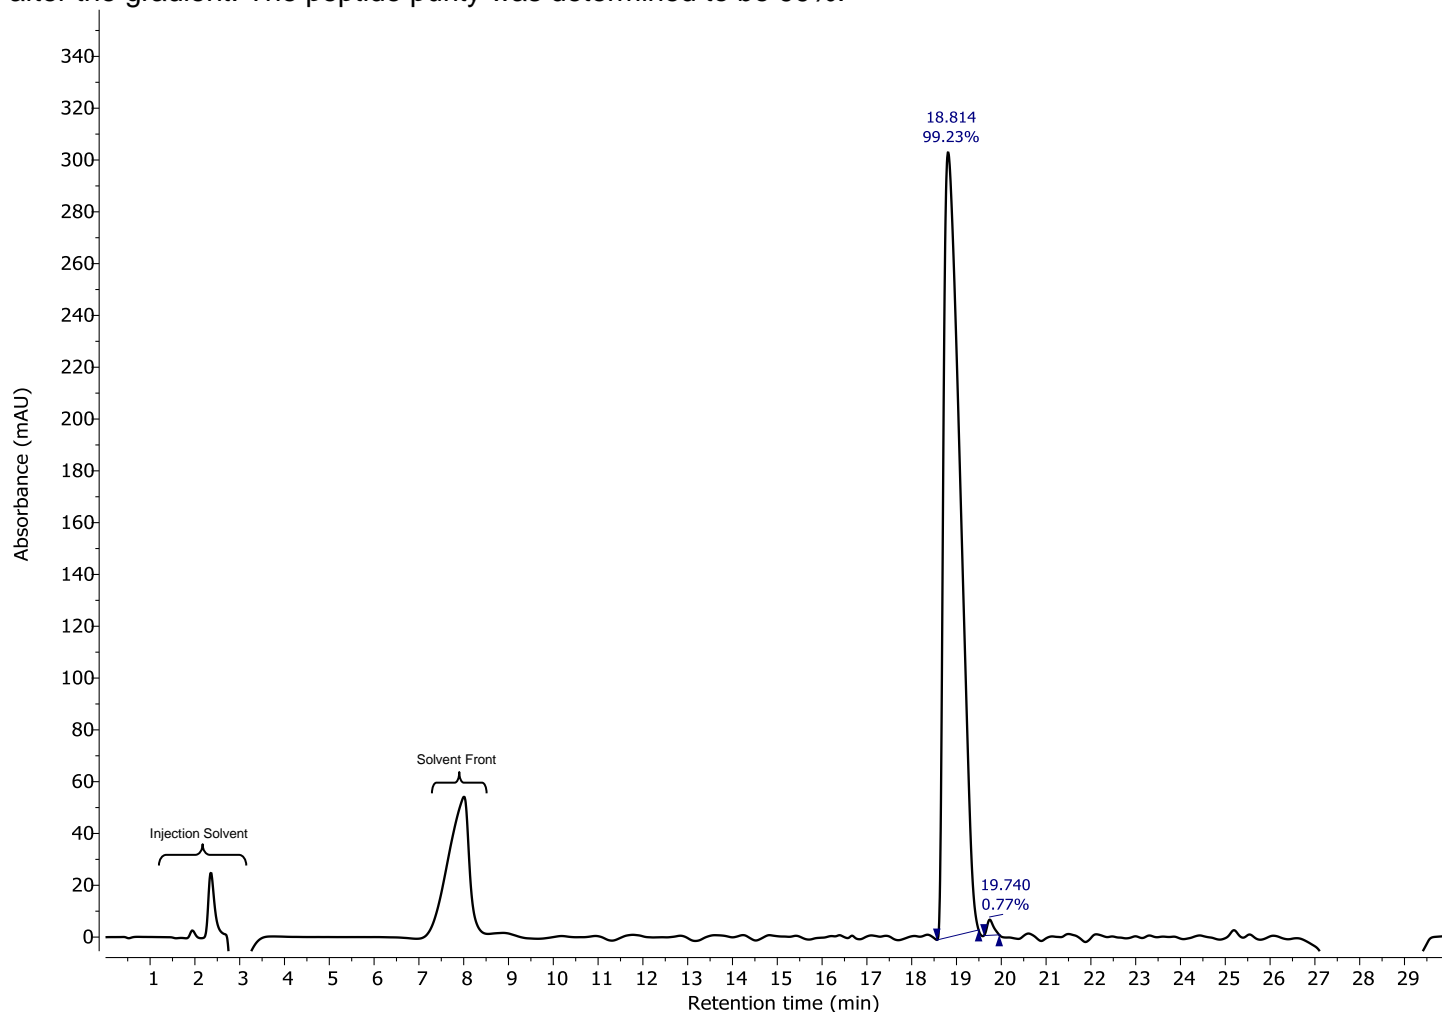

Synthesis of **5**



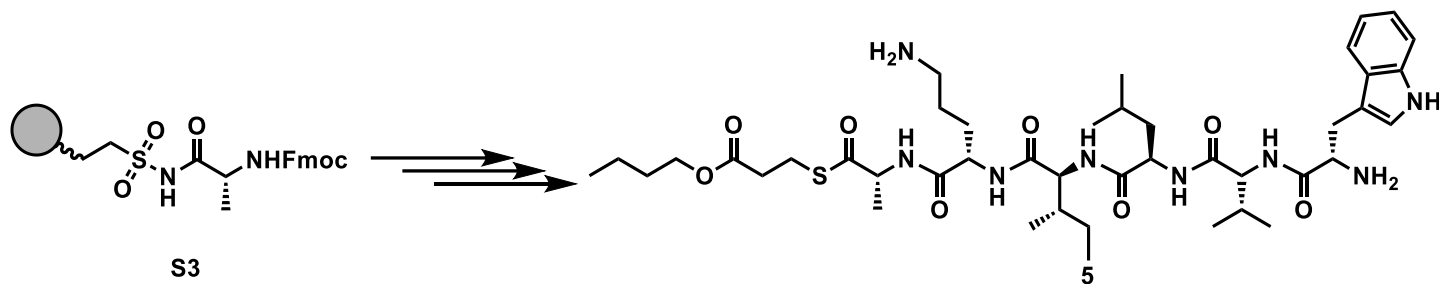

Peptide **5** was synthesized using the sulfonamide "safety-catch" resin according to the general protocol described earlier. The synthesis was initiated from 4-sulfamylbutryl resin preloaded with Fmoc-D-Ala-OH **S3** (0.05 mmol) and utilized the following amino acids: Fmoc-L-Orn(Boc)-OH, Fmoc-L-Ile-OH, Fmoc-D-Leu-OH, Fmoc-D-Val-OH, and Boc-L-Trp(Boc)-OH, with butyl 3-mercaptopropionate used as the cleaving thiol. The crude peptide was obtained as an off-white solid (15.5 mg, 29% yield) and was analyzed via RP-UPLC. It was used in further enzyme assays without undergoing further purification.

**<sup>1</sup>H NMR** (800 MHz, DMSO)  $\delta$  11.04 (s, 1H), 8.68 (dd,  $J = 36.9, 8.6$  Hz, 2H), 8.21 (dd,  $J = 24.9, 7.9$  Hz, 2H), 8.06 (bs, 3H), 7.85 (bs, 3H), 7.82 (d,  $J = 8.5$  Hz, 2H), 7.77 (d,  $J = 7.9$  Hz, 1H), 7.37 (d,  $J = 7.9$  Hz, 1H), 7.24 (s, 1H), 7.09 (t,  $J = 7.3$  Hz, 1H), 7.01 (t,  $J = 7.2$  Hz, 1H), 4.42 – 4.31 (m, 4H), 4.29 (d,  $J = 7.2$  Hz, 1H), 4.25 (t,  $J = 7.6$  Hz, 1H), 4.19 (s, 1H), 4.02 (t,  $J = 6.3$  Hz, 2H), 3.35 (bs, 3H), 3.26 (dd,  $J = 14.3, 5.6$  Hz, 1H), 3.05 (dd,  $J = 14.6, 8.9$  Hz, 1H), 3.00 – 2.92 (m, 2H), 2.78 (s, 2H), 2.54 (t,  $J = 6.6$  Hz, 2H), 2.50 (s, 2H), 1.93 (h,  $J = 6.9$  Hz, 1H), 1.74 (s, 1H), 1.69 (s, 1H), 1.61 – 1.49 (m, 8H), 1.46 (t,  $J = 6.9$  Hz, 2H), 1.38 (s, 1H), 1.32 (h,  $J = 7.3$  Hz, 3H), 1.26 (d,  $J = 7.3$  Hz, 4H), 1.05 (hept,  $J = 7.3$  Hz, 1H), 0.88 (quint,  $J = 7.2, 4.3$  Hz, 8H), 0.84 (d,  $J = 6.3$  Hz, 4H), 0.81 – 0.71 (m, 16H).

**<sup>13</sup>C NMR** (201 MHz, DMSO)  $\delta$  201.2, 171.6, 171.3, 171.1, 170.8, 170.3, 168.7, 136.4, 127.0, 125.0, 121.1, 118.7, 118.3, 111.4, 106.9, 63.9, 57.6, 56.4, 54.7, 52.6, 51.7, 51.2, 41.0, 38.5, 36.9, 33.6, 31.0, 30.1, 29.0, 28.0, 24.2, 24.1, 23.5, 23.2, 23.0, 21.6, 19.1, 18.6, 17.8, 17.3, 15.3, 13.5, 10.9.

**Mass spec:** expected neutral mass for  $C_{43}H_{70}N_8O_8S$  (Da): 858.5037, observed neutral mass (Da): 858.5063, mass error (ppm) 3.0.

**UPLC Trace** Obtained using mobile phases of  $H_2O+0.1\%$  formic acid (A) and acetonitrile+0.1% formic acid (B). Samples were eluted using a gradient mode with mobile phase B ranging from 0% to 60% over 18 minutes at a flow rate of 0.5 mL/min. The column was equilibrated with 0% mobile phase B for 1 minute before and after the gradient. The crude peptide purity was determined to be 96%

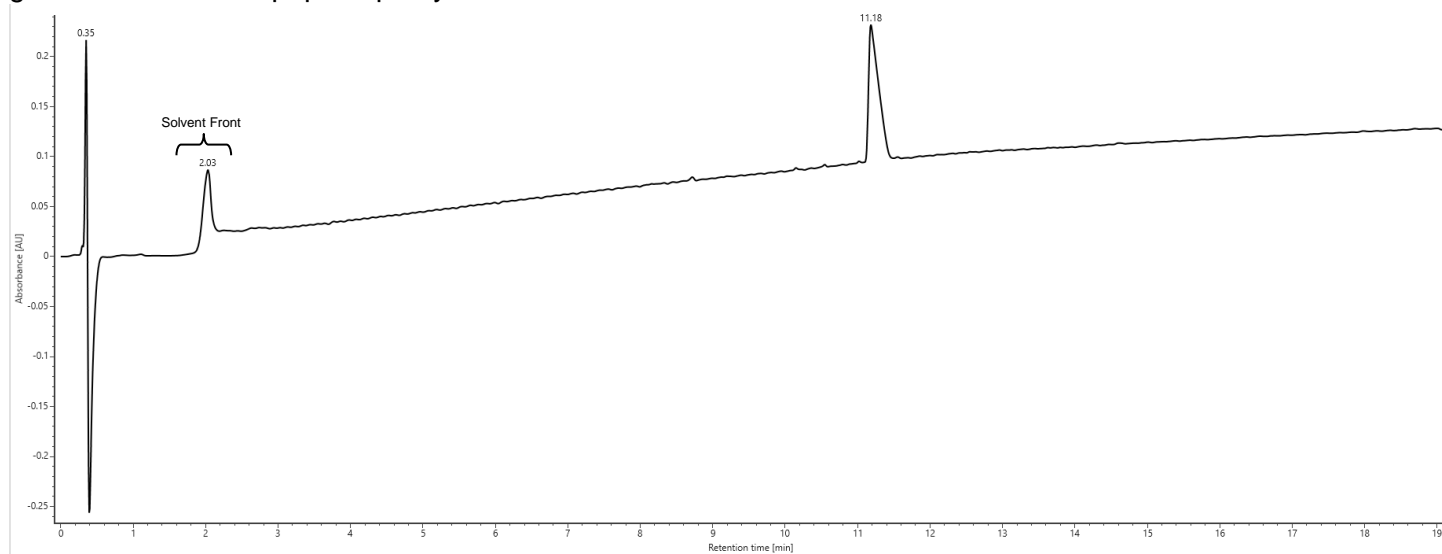

Synthesis of **6**

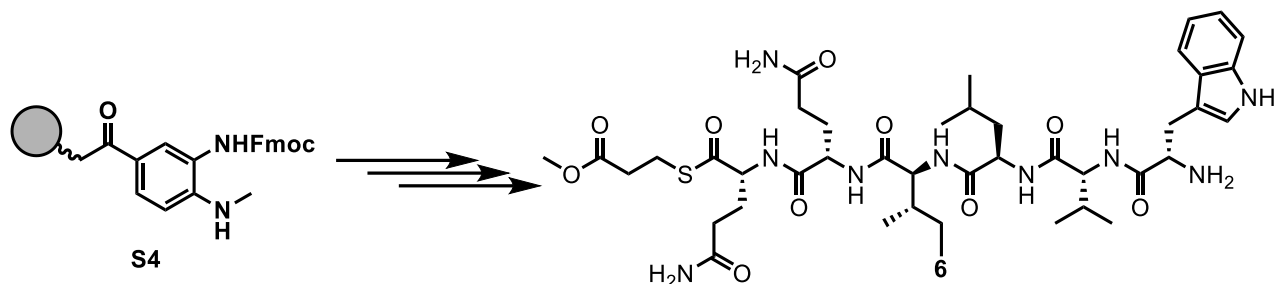

Peptide **6** was synthesized following the general protocol outlined above for the NDbz “safety-catch” resin. The synthesis was initiated from **S4** (0.15 mmol) using the following amino acids (Fmoc-L-Gln(Trt)-OH, Fmoc-L-Ile-OH, Fmoc-D-Leu-OH, Fmoc-D-Val-OH, Boc-L-Trp(Boc)-OH) and methyl 3-mercaptopropionate as the cleaving thiol. The crude peptide was purified via reverse-phase semi-preparative HPLC using mobile phases of H<sub>2</sub>O+0.1% formic acid (A) and acetonitrile+0.1% formic acid (B). Samples were eluted using a gradient mode with mobile phase B ranging from 0% to 60% over 22 minutes at a flow rate of 20 mL/min. The column was equilibrated with 0% mobile phase B for 1 minute before and 5 minutes after the gradient to yield an off-white solid (82.5 mg, 53% yield).

**<sup>1</sup>H NMR** (800 MHz, DMSO)  $\delta$  11.04 (s, 1H), 8.68 (d,  $J$  = 8.4 Hz, 1H), 8.52 (d,  $J$  = 9.5 Hz, 1H), 8.20 (d,  $J$  = 8.4 Hz, 1H), 8.14 (d,  $J$  = 8.1 Hz, 1H), 8.07 (s, 3H), 7.81 (d,  $J$  = 8.4 Hz, 1H), 7.76 (d,  $J$  = 8.1 Hz, 1H), 7.36 (d,  $J$  = 8.1 Hz, 1H), 7.26 (t,  $J$  = 25.5 Hz, 3H), 7.09 (dd,  $J$  = 50.4, 7.0 Hz, 1H), 7.01 (t,  $J$  = 8.1 Hz, 1H), 6.79 (d,  $J$  = 6.7 Hz, 2H), 4.40 (q,  $J$  = 7.0 Hz, 1H), 4.35 – 4.27 (m, 3H), 4.26 – 4.18 (m, 2H), 3.59 (s, 3H), 3.26 (dd,  $J$  = 5.3, 5.3 Hz, 1H), 3.06 (q,  $J$  = 6.7 Hz, 1H), 3.01 – 2.92 (m, 2H), 2.55 (t,  $J$  = 6.7 Hz, 2H), 2.17 – 2.03 (m, 4H), 2.01 – 1.91 (m, 2H), 1.89 – 1.83 (m, 1H), 1.82 – 1.70 (m, 3H), 1.58 (h,  $J$  = 8.1 Hz, 1H), 1.51 – 1.42 (m, 2H), 1.42 – 1.36 (m, 1H), 1.06 (h,  $J$  = 7.0 Hz, 1H), 0.87 (d,  $J$  = 8.1 Hz, 3H), 0.82 (d,  $J$  = 7.0 Hz, 3H), 0.82 – 0.70 (m, 13H).

**<sup>13</sup>C NMR** (201 MHz, DMSO)  $\delta$  201.07, 174.08, 173.57, 172.03, 171.94, 171.15, 170.66, 169.10, 136.74, 127.43, 125.41, 121.53, 119.09, 118.71, 111.81, 107.29, 59.07, 58.04, 56.90, 52.96, 52.68, 51.94, 51.65, 41.36, 36.99, 33.85, 31.83, 31.35, 31.20, 28.53, 28.36, 27.28, 24.58 (d,  $J$  = 14.8 Hz), 23.60, 23.29, 22.03, 19.44, 18.11, 15.69, 11.23.

**Mass spec:** expected neutral mass for C<sub>45</sub>H<sub>71</sub>N<sub>9</sub>O<sub>10</sub>S (Da): 887.4575, observed neutral mass (Da): 887.4599, mass error (ppm) 2.7.

**UPLC Trace** Obtained using mobile phases of H<sub>2</sub>O+0.1% formic acid (A) and acetonitrile+0.1% formic acid (B). Samples were eluted using a gradient mode with mobile phase B ranging from 0% to 40% over 11 minutes at a flow rate of 0.5 mL/min. The column was equilibrated with 0% mobile phase B for 1 minute before and after the gradient. The crude peptide purity was determined to be 99%

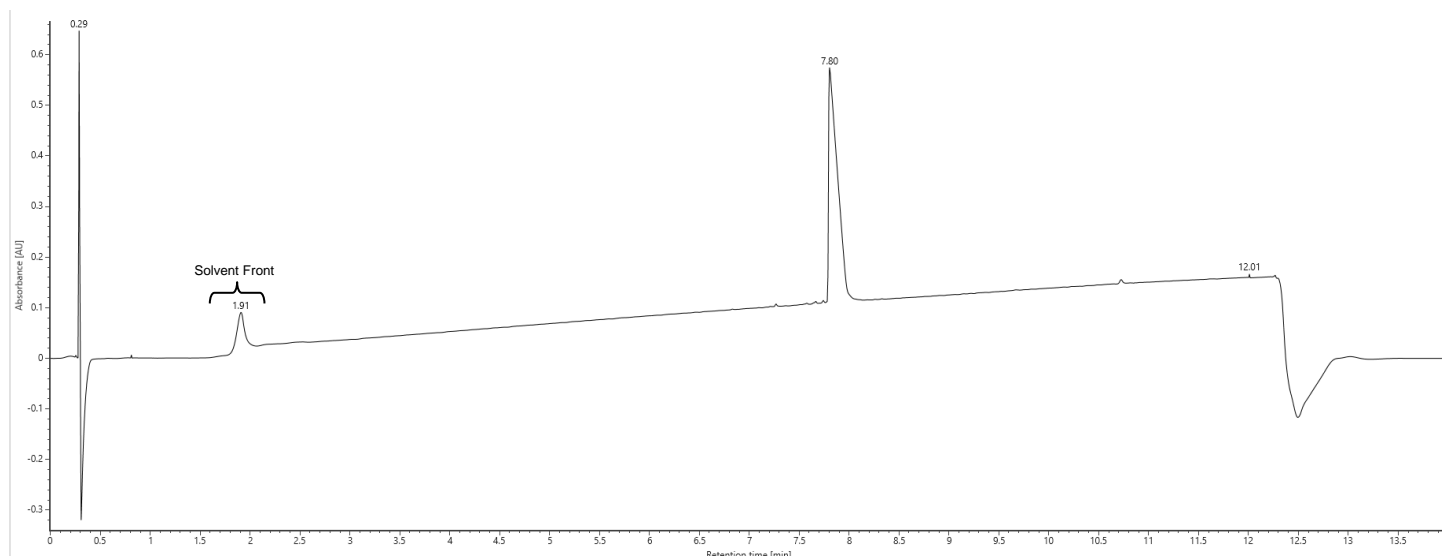

## Synthesis of 7

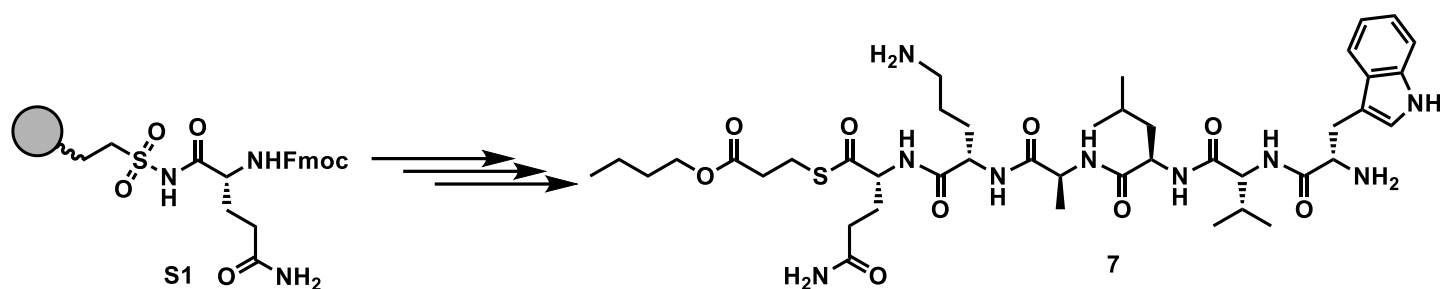

Peptide **7** was synthesized following the general protocol outlined above for the sulfonamide “safety-catch” resin. The synthesis was initiated from **S1** (0.05 mmol) using the following amino acids (Boc-L-Trp(Boc)-OH, Fmoc-D-Val-OH, Fmoc-D-Leu-OH, Fmoc-L-Ala-OH, Fmoc-L-Orn(Boc)-OH) and butyl 3-mercaptopropionate as the cleaving thiol. The obtained crude peptide was obtained as an off white solid (26.9 mg, 49% yield) analyzed via RP-UPLC and was used in further enzyme assays without further purification.

**<sup>1</sup>H NMR** (800 MHz, DMSO)  $\delta$  10.99 (s, 1H), 8.59 (d,  $J = 7.2$  Hz, 1H), 8.49 (s, 1H), 8.16 (d,  $J = 8.6$  Hz, 1H), 8.09 (d,  $J = 7.8$  Hz, 1H), 7.94 (d,  $J = 7.8$  Hz, 1H), 7.71 (d,  $J = 5.6$  Hz, 1H), 7.35 (d,  $J = 8.8$  Hz, 1H), 7.32 (d,  $J = 7.2$  Hz, 1H), 7.25 (s, 1H), 7.21 (s, 1H), 7.08 (t,  $J = 5.6$  Hz, 1H), 7.00 (t,  $J = 7.8$  Hz, 1H), 6.80 (s, 1H), 4.38 – 4.27 (m, 4H), 4.23 (t,  $J = 5.4$  Hz, 1H), 4.01 (t,  $J = 4.8$  Hz, 3H), 3.20 (d,  $J = 10.2$  Hz, 1H), 3.07 (s, 1H), 3.00 – 2.91 (m, 3H), 2.79 (t,  $J = 6.4$  Hz, 2H), 2.55 (t,  $J = 6.2$  Hz, 2H), 2.10 (hept,  $J = 7.2$  Hz, 2H), 2.01 – 1.91 (m, 2H), 1.78 – 1.69 (m, 2H), 1.62 – 1.50 (m, 6H), 1.50 – 1.40 (m, 2H), 1.31 (h,  $J = 4.8$  Hz, 2H), 1.18 (d,  $J = 6.2$  Hz, 3H), 1.10 (s, 2H), 0.87 (t,  $J = 6.2$  Hz, 6H), 0.84 (d,  $J = 7.0$  Hz, 3H), 0.76 (dd,  $J = 8.6, 6.2$  Hz, 6H).

**<sup>13</sup>C NMR** (201 MHz, DMSO)  $\delta$  201.0, 173.6, 172.4, 172.0, 171.9, 171.5, 171.0, 136.7, 127.5, 125.0, 121.5, 119.0, 118.7, 111.8, 64.3, 59.1, 58.1, 53.7, 52.2, 51.6, 49.1, 48.4, 41.1, 38.9, 34.0, 31.2, 31.2, 30.5, 29.3, 29.3, 27.3, 27.2, 24.6, 23.9, 23.6, 23.4, 21.9, 19.5, 19.0, 18.8, 18.2, 13.9.

**Mass spec:** expected neutral mass for  $C_{42}H_{67}N_9O_9S$  (Da): 873.4782, observed neutral mass (Da): 873.4791, mass error (ppm) 1.0.

**UPLC Trace** Obtained using mobile phases of  $H_2O+0.1\%$  formic acid (A) and acetonitrile+0.1% formic acid (B). Samples were eluted using a gradient mode with mobile phase B ranging from 0% to 40% over 11 minutes at a flow rate of 0.5 mL/min. The column was equilibrated with 0% mobile phase B for 1 minute before and 2 minutes after the gradient. The crude peptide purity was determined to be 97%.

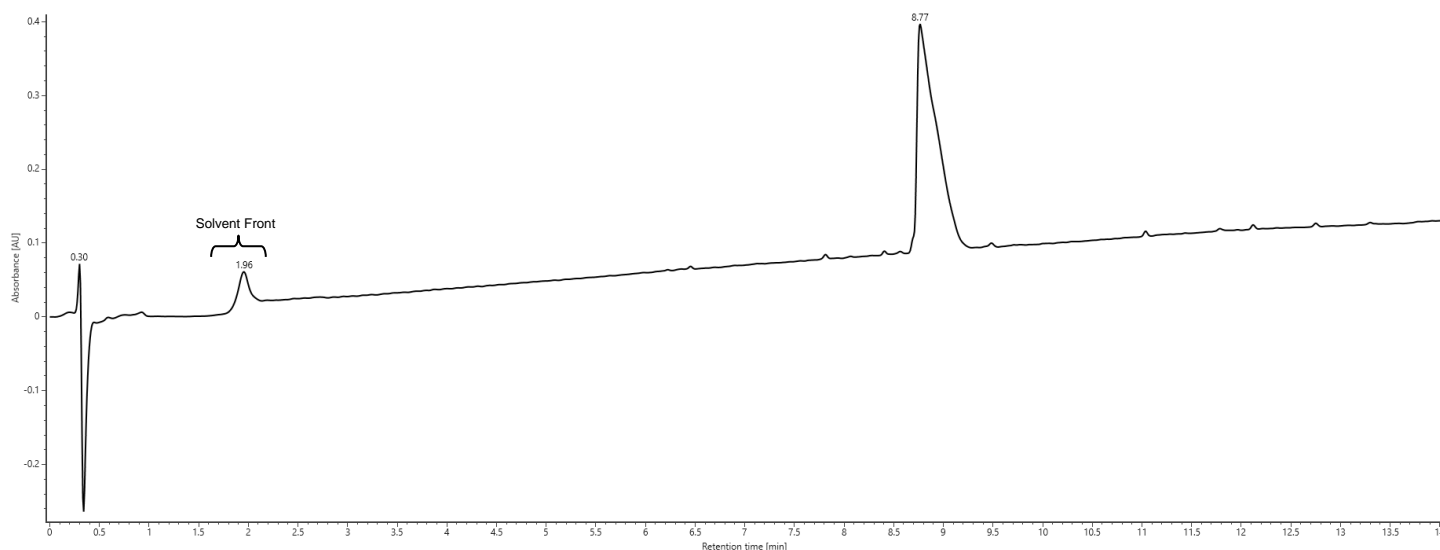

## Synthesis of 8

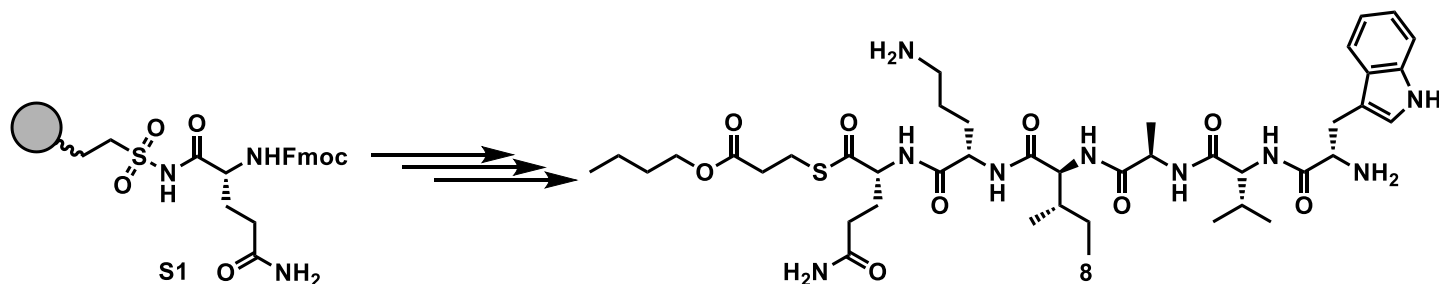

Peptide **8** was synthesized using the sulfonamide "safety-catch" resin according to the general protocol described earlier. The synthesis was initiated from **S1** (0.05 mmol) and utilized the following amino acids: Fmoc-L-Orn(Boc)-OH, Fmoc-L-Ile-OH, Fmoc-D-Ala-OH, Fmoc-D-Val-OH, and Boc-L-Trp(Boc)-OH, with butyl 3-mercaptopropionate used as the cleaving thiol. The obtained crude peptide was obtained as an off-white solid (22.48 mg, 41% yield) and was analyzed via RP-UPLC. It was used in further enzyme assays without undergoing further purification.

**<sup>1</sup>H NMR** (800 MHz, DMSO)  $\delta$  11.00 (s, 1H), 8.64 (d,  $J$  = 5.1 Hz, 1H), 8.54 (d,  $J$  = 5.9 Hz, 1H), 8.29 (d,  $J$  = 5.1 Hz, 1H), 8.18 (d,  $J$  = 7.5 Hz, 1H), 7.80 (d,  $J$  = 8.6 Hz, 1H), 7.71 (d,  $J$  = 6.9 Hz, 1H), 7.48 (s, 3H), 7.35 (d,  $J$  = 6.9 Hz, 1H), 7.22 (d,  $J$  = 30.9 Hz, 2H), 7.08 (t,  $J$  = 6.4 Hz, 1H), 7.00 (t,  $J$  = 8.1 Hz, 1H), 6.80 (s, 1H), 4.41 (p,  $J$  = 4.5 Hz, 1H), 4.35 (p,  $J$  = 5.1 Hz, 1H), 4.33 – 4.21 (m, 3H), 4.02 (t,  $J$  = 6.4 Hz, 3H), 3.22 (dd,  $J$  = 5.3, 3.5 Hz, 1H), 3.07 – 2.92 (m, 3H), 2.79 (t,  $J$  = 6.3 Hz, 2H), 2.57 – 2.52 (m, 2H), 2.23 – 2.07 (m, 2H), 1.97 (h,  $J$  = 5.1 Hz, 1H), 1.90 (h,  $J$  = 5.7 Hz, 1H), 1.78 – 1.64 (m, 3H), 1.60 – 1.46 (m, 5H), 1.41 – 1.35 (m, 1H), 1.32 (h,  $J$  = 7.5 Hz, 2H), 1.22 (d,  $J$  = 6.9 Hz, 3H), 1.05 (h,  $J$  = 7.5 Hz, 1H), 0.88 (t,  $J$  = 6.9 Hz, 3H), 0.82 – 0.72 (m, 13H).

**<sup>13</sup>C NMR** (201 MHz, DMSO)  $\delta$  200.6, 173.1, 171.8, 171.6, 171.1, 170.8, 170.4, 136.3, 127.1, 124.7, 121.1, 118.6, 118.3, 111.4, 107.8, 63.9, 58.7, 57.5, 56.4, 53.2, 51.6, 48.3, 38.5, 37.1, 33.7, 30.8, 30.8, 30.1, 29.2, 28.7, 26.9, 24.1, 23.6, 23.2, 19.1, 18.6, 17.9, 15.3, 13.5, 11.0.

**Mass spec:** expected neutral mass for C<sub>42</sub>H<sub>67</sub>N<sub>9</sub>O<sub>9</sub>S (Da): 873.4782, observed neutral mass (Da): 873.4759, mass error (ppm) 2.7.

**UPLC Trace** Obtained using mobile phases of H<sub>2</sub>O+0.1% formic acid (A) and acetonitrile+0.1% formic acid (B). Samples were eluted using a gradient mode with mobile phase B ranging from 0% to 60% over 18 minutes at a flow rate of 0.5 ml/min. The column was equilibrated with 0% mobile phase B for 1 minute before and 2 minutes after the gradient. The crude peptide purity was determined to be 97%.

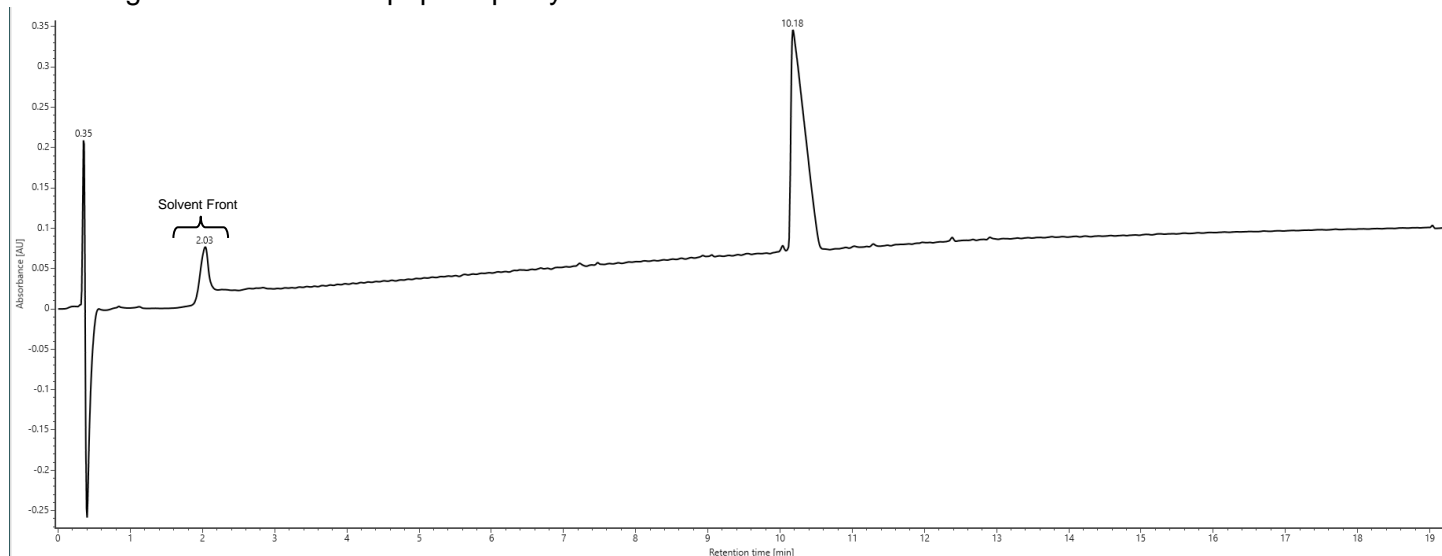

Synthesis of **9**

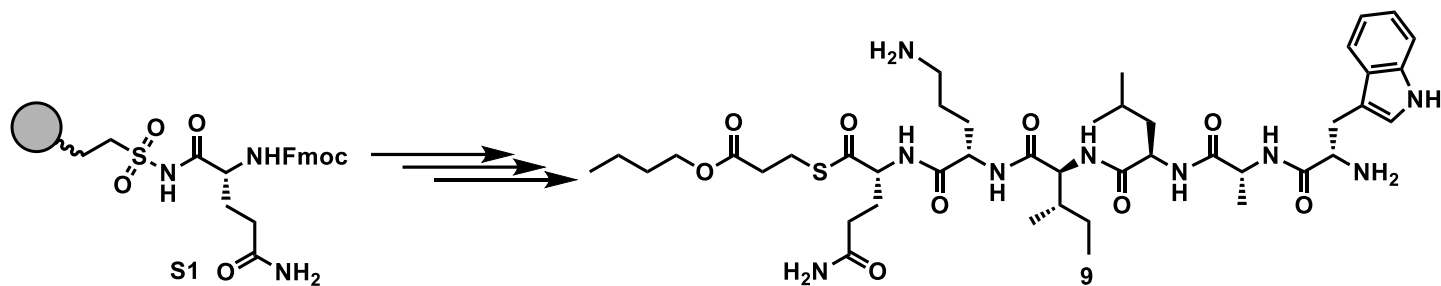

Peptide **9** was synthesized following the general protocol outlined above for the sulfonamide “safety-catch” resin. The synthesis was initiated from **S1** (0.05 mmol) using the following amino acids (Fmoc-L-Orn(Boc)-OH, Fmoc-L-Ile-OH, Fmoc-D-Leu-OH, Fmoc-D-Ala-OH, Boc-L-Trp(Boc)-OH) and butyl 3-mercaptopropionate as the cleaving thiol. The obtained crude peptide was obtained as an off-white solid (21.4 mg, 41% yield) analyzed via RP-UPLC and was used in further enzyme assays without further purification.

**<sup>1</sup>H NMR** (800 MHz, DMSO)  $\delta$  10.98 (s, 1H), 8.61 (d,  $J$  = 6.8 Hz, 1H), 8.49 (d,  $J$  = 6.8 Hz, 1H), 8.15 (dd,  $J$  = 9.1, 7.9 Hz, 2H), 7.84 (d,  $J$  = 6.8 Hz, 1H), 7.61 (d,  $J$  = 8.4 Hz, 1H), 7.34 (d,  $J$  = 7.9 Hz, 1H), 7.25 (s, 2H), 7.19 (d,  $J$  = 1.8 Hz, 2H), 7.08 (t,  $J$  = 7.9 Hz, 2H), 6.99 (t,  $J$  = 6.2 Hz, 1H), 6.80 (s, 1H), 4.41 (q,  $J$  = 6.1 Hz, 1H), 4.36 – 4.26 (m, 3H), 4.23 (t,  $J$  = 6.7 Hz, 1H), 4.02 (t,  $J$  = 6.2 Hz, 2H), 3.87 (t,  $J$  = 6.2 Hz, 1H), 3.16 (dd,  $J$  = 6.2, 6.2 Hz, 1H), 3.01 – 2.90 (m, 3H), 2.79 (t,  $J$  = 7.3 Hz, 2H), 2.58 – 2.52 (m, 2H), 2.11 (hept,  $J$  = 8.5 Hz, 2H), 1.96 (h,  $J$  = 4.6 Hz, 1H), 1.79 – 1.64 (m, 3H), 1.61 – 1.50 (m, 7H), 1.49 – 1.42 (m, 3H), 1.42 – 1.35 (m, 1H), 1.32 (h,  $J$  = 6.8 Hz, 3H), 1.11 (d,  $J$  = 4.6 Hz, 5H), 1.05 (p,  $J$  = 6.1 Hz, 1H), 0.88 (t,  $J$  = 7.3 Hz, 7H), 0.83 (d,  $J$  = 5.6 Hz, 4H), 0.81 – 0.73 (m, 8H).

**<sup>13</sup>C NMR** (201 MHz, DMSO)  $\delta$  200.6, 173.1, 172.0, 171.8, 171.6, 171.1, 170.8, 136.2, 127.2, 124.5, 121.0, 118.5, 118.3, 111.4, 64.7, 63.9, 58.7, 56.5, 53.5, 51.7, 51.3, 48.7, 48.2, 40.8, 38.5, 36.8, 33.6, 30.8, 30.1, 29.1, 26.9, 26.8, 24.3, 24.1, 23.6, 23.2, 23.0, 21.5, 18.8, 18.3, 17.6, 17.5, 15.3, 13.5, 10.9.

**Mass spec:** expected neutral mass for C<sub>43</sub>H<sub>69</sub>N<sub>9</sub>O<sub>9</sub>S (Da): 887.4939, observed neutral mass (Da): 887.4965, mass error (ppm) 2.9.

**UPLC Trace** Obtained using mobile phases of H<sub>2</sub>O+0.1% formic acid (A) and acetonitrile+0.1% formic acid (B). Samples were eluted using a gradient mode with mobile phase B ranging from 0% to 45% over 13 minutes at a flow rate of 0.5 ml/min. The column was equilibrated with 0% mobile phase B for 1 minute before and 2 minutes after the gradient. The crude peptide purity was determined to be 96%.

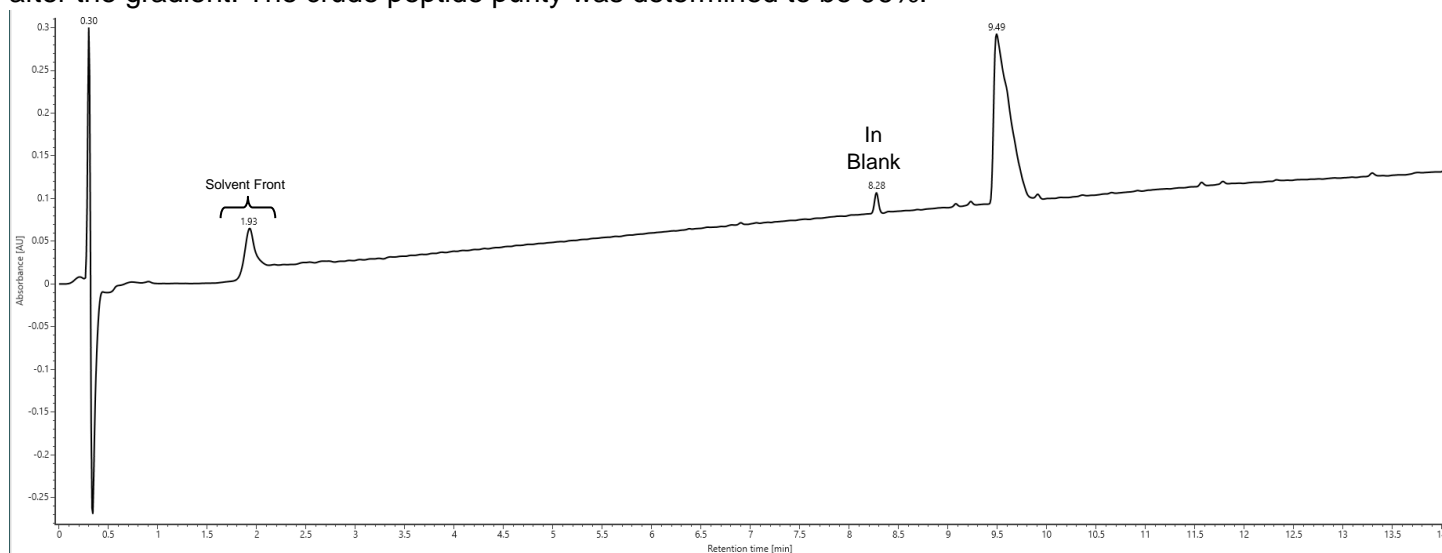

Synthesis of **10**

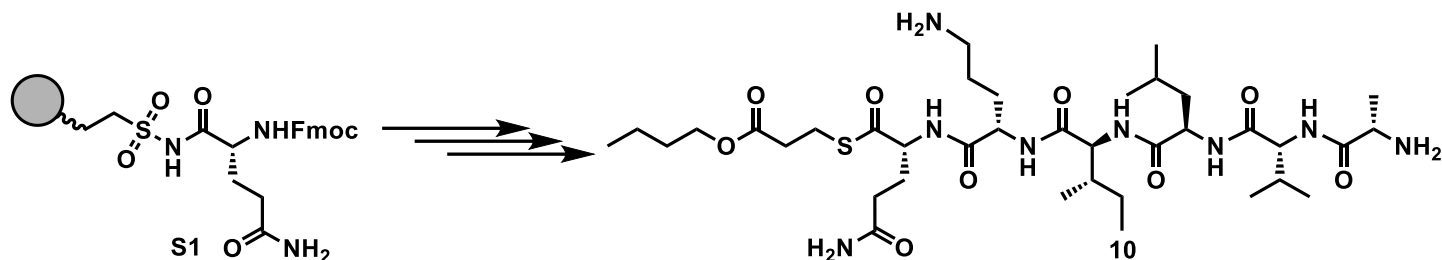

Peptide **10** was synthesized following the general protocol outlined above for the sulfonamide “safety-catch” resin. The synthesis was initiated from **S1** (0.05 mmol) using the following amino acids (Fmoc-L-Orn(Boc)-OH, Fmoc-L-Ile-OH, Fmoc-D-Leu-OH, Fmoc-D-Val-OH, Boc-L-Ala-OH) and butyl 3-mercaptopropionate as the cleaving thiol. The obtained crude peptide was obtained as an off white solid (10.6 mg, 21% yield) analyzed via RP-UPLC and was used in further enzyme assays without further purification.

**<sup>1</sup>H NMR** (800 MHz, DMSO)  $\delta$  8.64 (d,  $J = 7.3$  Hz, 1H), 8.47 (d,  $J = 8.5$  Hz, 1H), 8.21 (d,  $J = 6.7$  Hz, 1H), 8.15 (d,  $J = 7.3$  Hz, 1H), 7.96 (s, 5H), 7.84 (d,  $J = 8.6$  Hz, 2H), 7.25 (s, 1H), 6.80 (s, 1H), 4.39 (p,  $J = 4.1$  Hz, 2H), 4.33 (q,  $J = 7.0$  Hz, 1H), 4.29 (q,  $J = 5.7$  Hz, 1H), 4.24 (t,  $J = 7.6$  Hz, 1H), 4.02 (t,  $J = 6.7$  Hz, 2H), 3.94 (q,  $J = 5.7$  Hz, 1H), 3.00 – 2.91 (m, 2H), 2.79 (t,  $J = 6.1$  Hz, 2H), 2.58 – 2.51 (m, 2H), 2.11 (h,  $J = 8.2$  Hz, 2H), 2.03 – 1.92 (m, 2H), 1.77 – 1.66 (m, 3H), 1.60 – 1.49 (m, 7H), 1.45 (t,  $J = 6.0$  Hz, 3H), 1.37 (d,  $J = 7.0$  Hz, 5H), 1.32 (h,  $J = 8.0$  Hz, 3H), 1.04 (hept,  $J = 7.6$  Hz, 1H), 0.90 – 0.73 (m, 27H).

**<sup>13</sup>C NMR** (201 MHz, DMSO)  $\delta$  200.6, 173.1, 171.6, 171.1, 170.8, 170.4, 169.6, 63.9, 58.7, 57.4, 56.4, 51.6, 51.2, 48.2, 41.0, 38.5, 36.8, 33.6, 31.1, 30.8, 30.1, 29.2, 26.9, 24.2, 24.1, 23.5, 23.2, 23.0, 21.5, 19.2, 18.6, 17.8, 17.7, 15.3, 13.5, 10.9

**Mass spec:** expected neutral mass for  $C_{37}H_{68}N_8O_9S$  (Da): 800.4830, observed neutral mass (Da): 800.4830, mass error (ppm) 1.2.

**UPLC Trace** Obtained using mobile phases of  $H_2O+0.1\%$  formic acid (A) and acetonitrile+0.1% formic acid (B). Samples were eluted using a gradient mode with mobile phase B ranging from 5% to 60% over 18 minutes at a flow rate of 1 mL/min. The column was equilibrated with 5% mobile phase B for 1 minute before and 2 minutes after the gradient. The crude peptide purity was determined to be >99%.

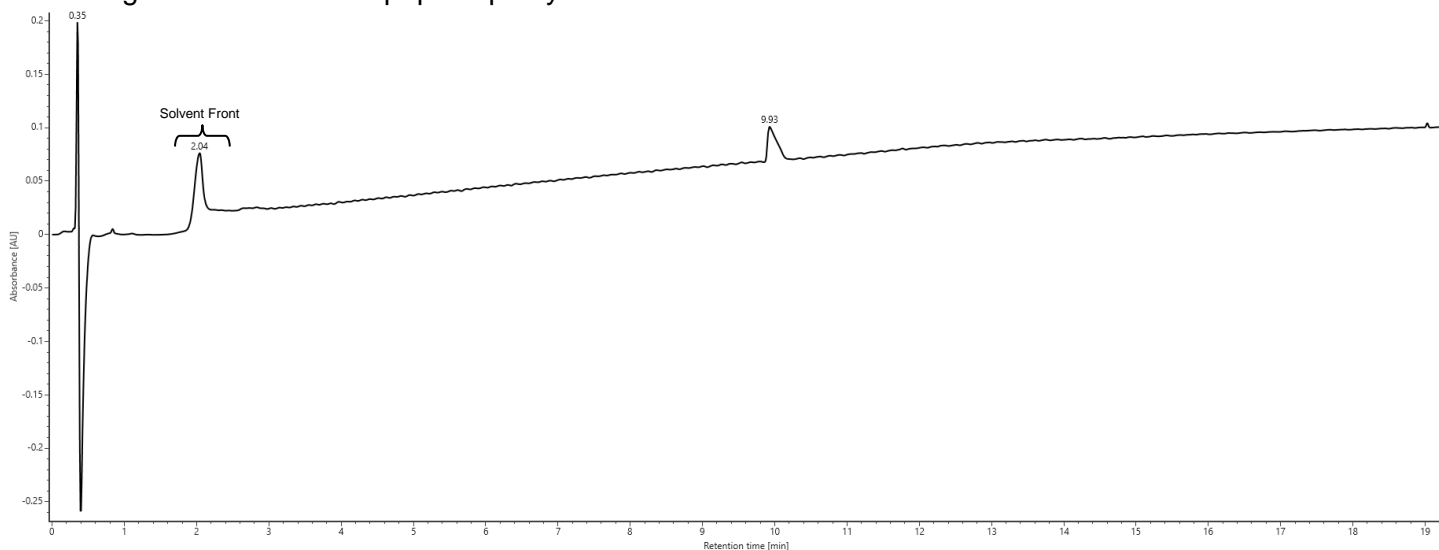

Synthesis of **11**

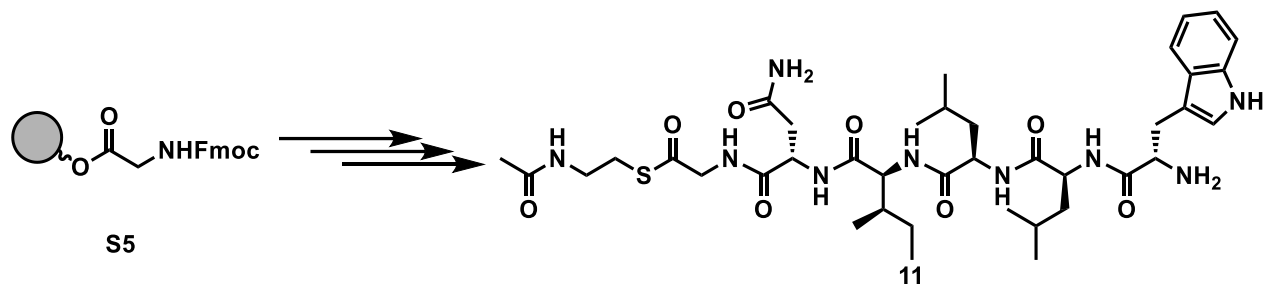

Peptide **11** was synthesized following a previously described method<sup>1</sup>. Briefly, Fmoc-Gly-OH (3 eq) and *i*-Pr<sub>2</sub>EtN (6 eq) were loaded onto 2-chlorotritylchloride (2-CTC) resin in DMF. After 2 hours, unreacted resin was capped with MeOH, and solid-phase peptide synthesis (SPPS) was initiated from **S5** (0.05 mmol) using Fmoc-L-Asn(Trt)-OH, Fmoc-L-Ile-OH, Fmoc-D-Leu-OH, Fmoc-L-Leu-OH, and Boc-L-Trp(Boc)-OH. To cleave the peptide from the 2-chlorotrityl resin, a solution of 25% hexafluoroisopropanol (HFIP) in DCM (3.0 mL) was added to the resin and shaken for 30 minutes at room temperature. The reaction mixture was filtered, and the filtrate was washed with DCM (10 mL), concentrated, redissolved in a mixture of acetonitrile-water, frozen, and lyophilized. The crude linear peptide was used in the next reaction without further purification. For the next step, the crude peptide was dissolved in DCM/DMF, and N-Acetylcysteamine (10 equiv.), 2,6 Lutidine (5 equiv.), and HCTU (5 equiv.) were added. The reaction was stirred overnight at room temperature, quenched with 40 mL EtOAc, and washed with saturated aqueous NH<sub>4</sub>Cl (2x 15 mL), saturated aqueous NaHCO<sub>3</sub> (2x 10 mL), and brine (3x 20 mL). The product was dried over sodium sulfate, filtered, and concentrated. A cleaving cocktail of TFA/TIPS = 90:10 (3 mL) was added to remove protecting groups, and the mixture was shaken for 90 minutes. The volatiles were removed by a stream of air, and the peptide crashed out with 25 mL -20°C Et<sub>2</sub>O. The product was centrifuged at 3200 x g for 10 minutes at 4 °C, and the Et<sub>2</sub>O layer was removed by decantation. This procedure was repeated twice. The crude peptide was purified via reverse-phase semi-preparative HPLC using mobile phases of H<sub>2</sub>O+0.1% Formic acid (A) and acetonitrile+0.1% Formic acid (B). Samples were eluted using a gradient mode with mobile phase B ranging from 10% to 50% over 22 minutes at a flow rate of 20 mL/min. The column was equilibrated with 10% mobile phase B for 1 minute before and 5 minutes after the gradient to yield an off-white solid (3.7 mg, 9% yield). **Mass spec:** expected neutral mass for C<sub>39</sub>H<sub>61</sub>N<sub>9</sub>O<sub>8</sub>S (Da): 815.4364, observed neutral mass (Da): 815.4375, mass error (ppm) 1.3.

**HPLC Trace** Obtained using mobile phases of H<sub>2</sub>O+0.1% formic acid (A) and acetonitrile+0.1% formic acid (B). Samples were eluted using a gradient mode with mobile phase B ranging from 5% to 60% over 18 minutes at a flow rate of 0.5 mL/min. The column was equilibrated with 5% mobile phase B for 1 minute before and 5 minutes after the gradient. The peptide purity was determined to be 99%.

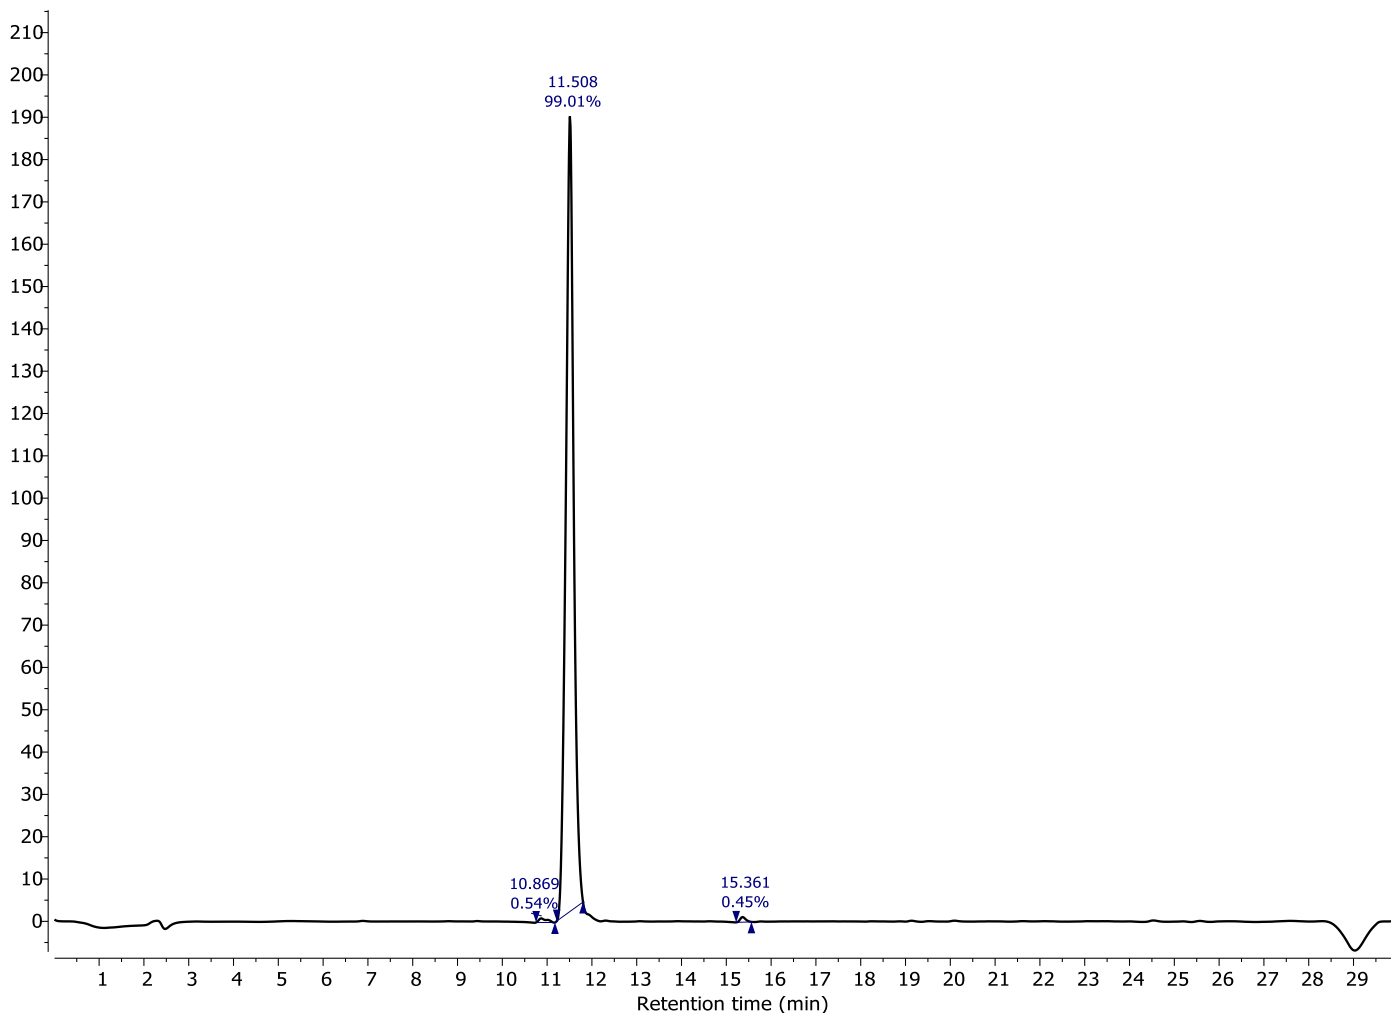

### Synthesis of **12-SNAC**

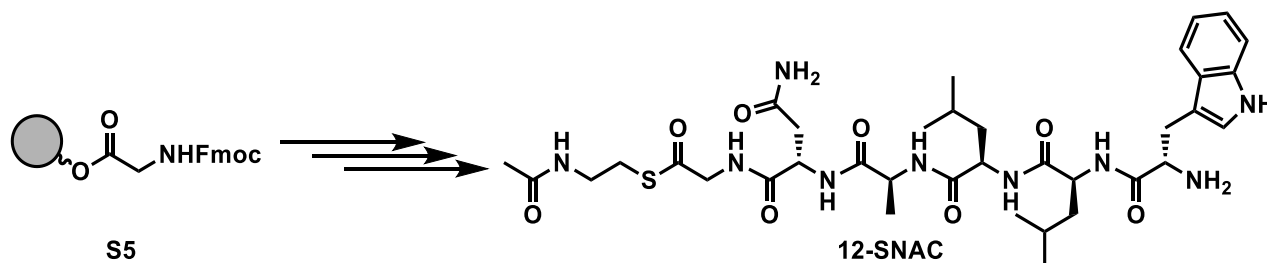

Peptide **12-SNAC** was synthesized following an identical protocol followed for Peptide 11 however Fmoc-L-Leu-OH was substituted with Fmoc-L-Ala-OH. The crude peptide was purified via reverse-phase semi-preparative HPLC using mobile phases of H<sub>2</sub>O+0.1% formic acid (A) and acetonitrile+0.1% formic acid (B). Samples were eluted using a gradient mode with mobile phase B ranging from 10% to 50% over 22 minutes at a flow rate of 20 mL/min. The column was equilibrated with 10% mobile phase B for 1 minute before and 5 minutes after the gradient to yield an off-white solid (2.1 mg, 5% yield).

**Mass spec:** expected neutral mass for C<sub>36</sub>H<sub>55</sub>N<sub>9</sub>O<sub>8</sub>S (Da): 773.3894, observed neutral mass (Da): 773.3904, mass error (ppm) 1.2.

**HPLC Trace** Obtained using mobile phases of H<sub>2</sub>O+0.1% formic acid (A) and acetonitrile+0.1% formic acid (B). Samples were eluted using a gradient mode with mobile phase B ranging from 5% to 60% over 18 minutes at a flow rate of 0.5 ml/min. The column was equilibrated with 5% mobile phase B for 1 minute before and 5 minutes after the gradient. The peptide purity was determined to be 91%.



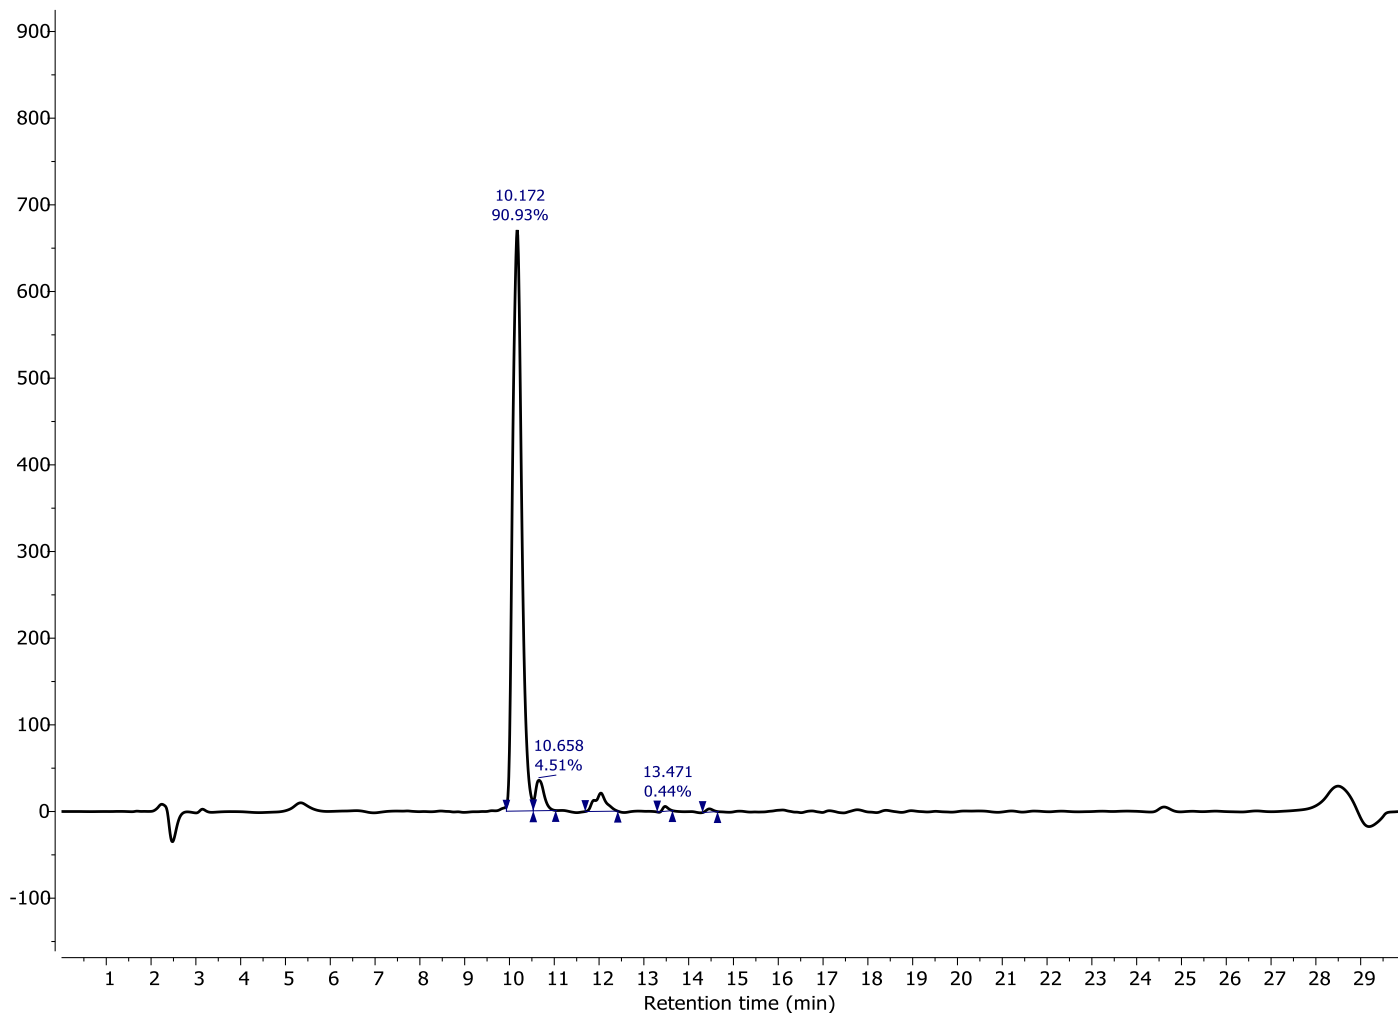

### Synthesis of **12-SMMP**

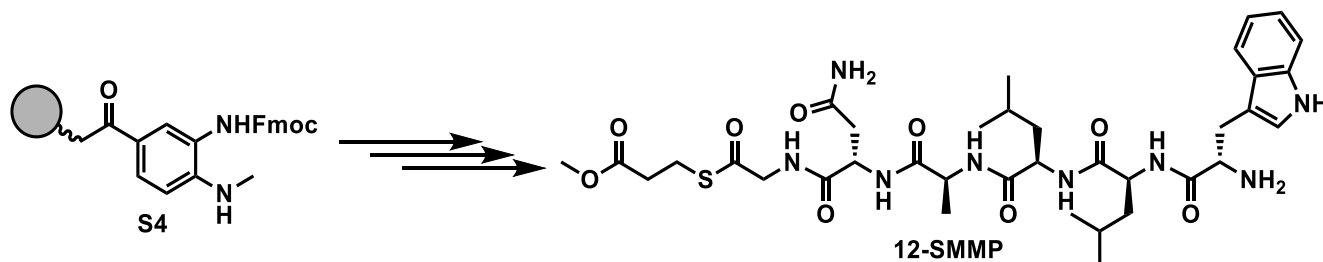

Peptide **12-SMMP** was synthesized following the general protocol outlined above for the NDbz “safety-catch” resin. The synthesis was initiated from **S4** (0.10 mmol) using the following amino acids (Fmoc-Gly-OH, Fmoc-L-Asn(Trt)-OH, Fmoc-L-Ala-OH, Fmoc-D-Leu-OH, Fmoc-L-Leu-OH, and Boc-L-Trp(Boc)-OH) and butyl 3-mercaptopropionate as the cleaving thiol. The crude peptide was purified via reverse-phase semi-preparative HPLC using mobile phases of H<sub>2</sub>O+0.05% Trifluoroacetic acid (A) and acetonitrile+0.05% Trifluoroacetic acid (B). Samples were eluted using a gradient mode with mobile phase B ranging from 0% to 50% over 22 minutes at a flow rate of 20 mL/min. The column was equilibrated with 0% mobile phase B for 1 minute before and 5 minutes after the gradient to yield an off-white solid (24.8 mg, 28% yield).

**<sup>1</sup>H NMR** (800 MHz, DMSO)  $\delta$  10.97 (s, 1H), 8.76 (d, J = 6.5 Hz, 1H), 8.42 – 8.32 (m, 2H), 8.21 (d, J = 8.5 Hz, 1H), 8.11 (d, J = 8.5 Hz, 1H), 8.02 (s, 3H), 7.73 (d, J = 7.4 Hz, 1H), 7.37 (t, J = 7.4 Hz, 2H), 7.19 (s, 1H), 7.10 (t, J = 7.4 Hz, 1H), 7.01 (t, J = 8.2 Hz, 1H), 6.90 (s, 1H), 4.62 (q, J = 6.2 Hz, 1H), 4.44 (q, J = 6.2 Hz, 1H), 4.39 –



1.58 (m, 2H), 1.56 – 1.37 (m, 8H), 1.37 – 1.03 (m, 5H), 0.85 (d,  $J = 5.7$  Hz, 9H), 0.50 (d,  $J = 5.7$  Hz, 2H), 0.42 (d,  $J = 6.9$  Hz, 3H).

$^{13}\text{C}$  NMR (201 MHz, DMSO)  $\delta$  200.6, 172.2, 172.0, 171.5, 170.6, 157.4, 156.5, 136.6, 130.5, 129.0, 128.1, 127.5, 127.3, 125.9, 124.5, 121.1, 118.3, 116.8, 116.6, 115.5, 111.5, 110.3, 70.1, 64.3, 61.4, 57.7, 53.5, 52.5, 51.5, 41.7, 40.6, 36.5, 33.9, 31.2, 30.5, 29.5, 28.5, 25.3, 24.1, 23.8, 23.1, 22.1, 19.3, 18.9, 17.6, 13.9.

**Mass spec:** expected neutral mass for  $\text{C}_{44}\text{H}_{65}\text{N}_9\text{O}_8\text{S}$  (Da): 879.4677, observed neutral mass (Da): 879.4673, mass error (ppm) 0.4.

**HPLC Trace** Obtained using mobile phases of  $\text{H}_2\text{O}+0.1\%$  formic acid (A) and acetonitrile+0.1% formic acid (B). Samples were eluted using a gradient mode with mobile phase B ranging from 0% to 55% over 28 minutes at a flow rate of 1 ml/min. The column was equilibrated with 0% mobile phase B for 3 minutes before and 5 minutes after the gradient. The peptide purity was determined to be >99%.

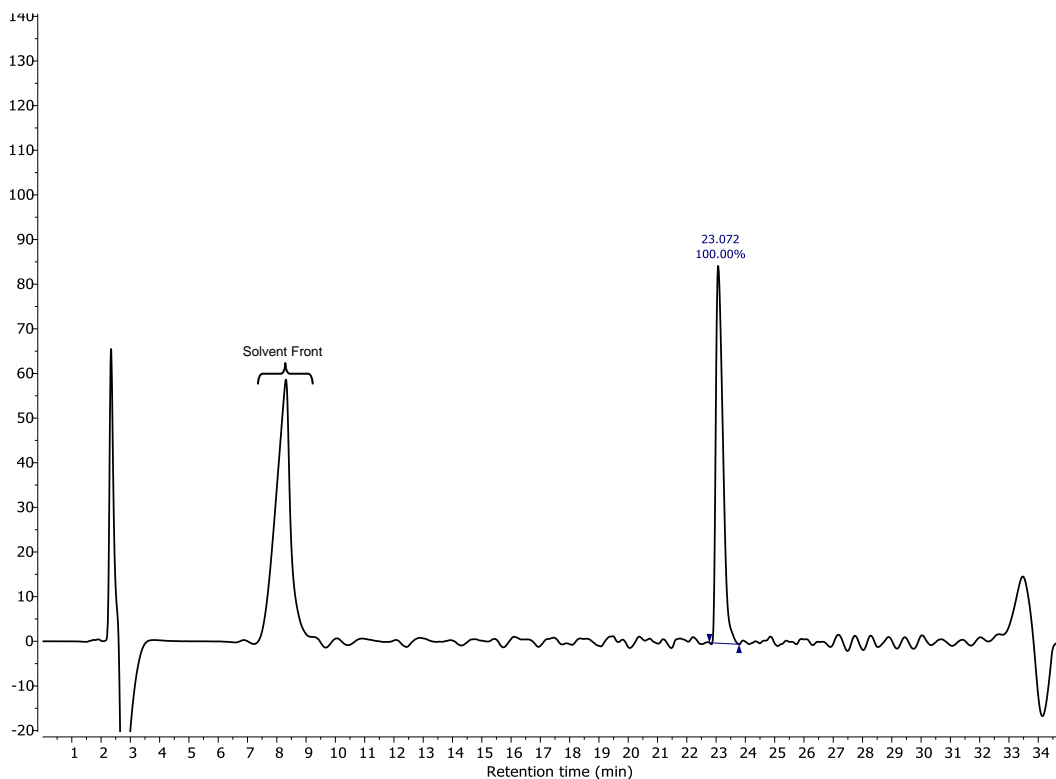

### Synthesis of **14**

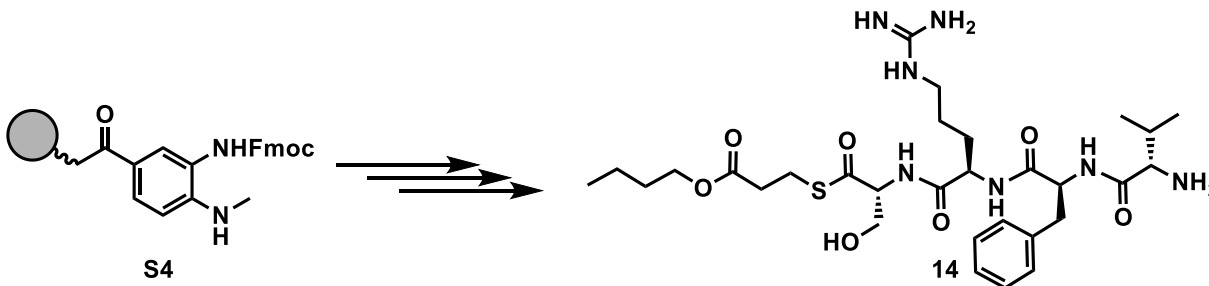

Peptide **14** was synthesized following the general protocol outlined above for the NDbz “safety-catch” resin. The synthesis was initiated from **S4** (0.10 mmol) using the following amino acids (Fmoc-D-Ser(tBu)-OH, Fmoc-D-Arg(Pbf)-OH, Fmoc-L-Phe-OH, and Boc-L-Val-OH) and butyl 3-mercaptopropionate as the cleaving thiol. The crude peptide was purified via reverse-phase semi-preparative HPLC using mobile phases of  $\text{H}_2\text{O}+0.05\%$  trifluoroacetic acid (A) and acetonitrile+0.05% trifluoroacetic acid (B). Samples were eluted using a gradient mode with mobile phase B ranging from 0% to 50% over 22 minutes at a flow rate of 20 mL/min. The column was equilibrated with 0% mobile phase B for 1 minute before and 5 minutes after the gradient to yield an off-white solid (17.8 mg, 20% yield).

**<sup>1</sup>H NMR** (800 MHz, DMSO)  $\delta$  8.66 (d,  $J$  = 7.0 Hz, 1H), 8.56 (d,  $J$  = 7.3 Hz, 1H), 8.33 (d,  $J$  = 7.3 Hz, 1H), 8.07 (s, 4H), 7.77 (s, 1H), 7.44 (s, 2H), 7.32 – 7.06 (m, 10H), 4.70 (p,  $J$  = 4.6 Hz, 1H), 4.41 (d,  $J$  = 38.4 Hz, 2H), 4.01 (dd,  $J$  = 220.7, 6.1 Hz, 3H), 3.72 (p,  $J$  = 8.2 Hz, 1H), 3.62 (s, 3H), 3.07 – 2.90 (m, 7H), 2.90 – 2.71 (m, 2H), 2.53 (t,  $J$  = 4.9 Hz, 2H), 2.08 (d,  $J$  = 4.9 Hz, 1H), 1.68 (d,  $J$  = 6.1 Hz, 1H), 1.53 (t,  $J$  = 7.0 Hz, 3H), 1.45 (p,  $J$  = 7.3 Hz, 1H), 1.31 (p,  $J$  = 8.2 Hz, 5H), 0.97 – 0.76 (m, 13H).

**<sup>13</sup>C NMR** (201 MHz, DMSO)  $\delta$  199.9, 172.7, 171.6, 169.8, 169.7, 157.4, 138.7, 138.2, 129.7, 129.2, 128.6, 126.6, 70.2, 64.3, 62.8, 61.6, 60.7, 56.0, 55.4, 34.5, 34.1, 30.5, 24.7, 24.3, 23.6, 19.8, 19.0, 17.3, 17.0, 13.9.

**Mass spec:** expected neutral mass for C<sub>30</sub>H<sub>49</sub>N<sub>7</sub>O<sub>7</sub>S (Da): 651.3414, observed neutral mass (Da): 651.3411, mass error (ppm) 0.5.

**UPLC Trace** Obtained using mobile phases of H<sub>2</sub>O+0.1% formic acid (A) and acetonitrile+0.1% formic acid (B). Samples were eluted using a gradient mode with mobile phase B ranging from 0% to 60% over 11 minutes at a flow rate of 0.5 ml/min. The column was equilibrated with 0% mobile phase B for 1 minute before and 2 minutes after the gradient. The crude peptide purity was determined to be 90.3% the only impurity being epimerized peptide that could not be separated out.

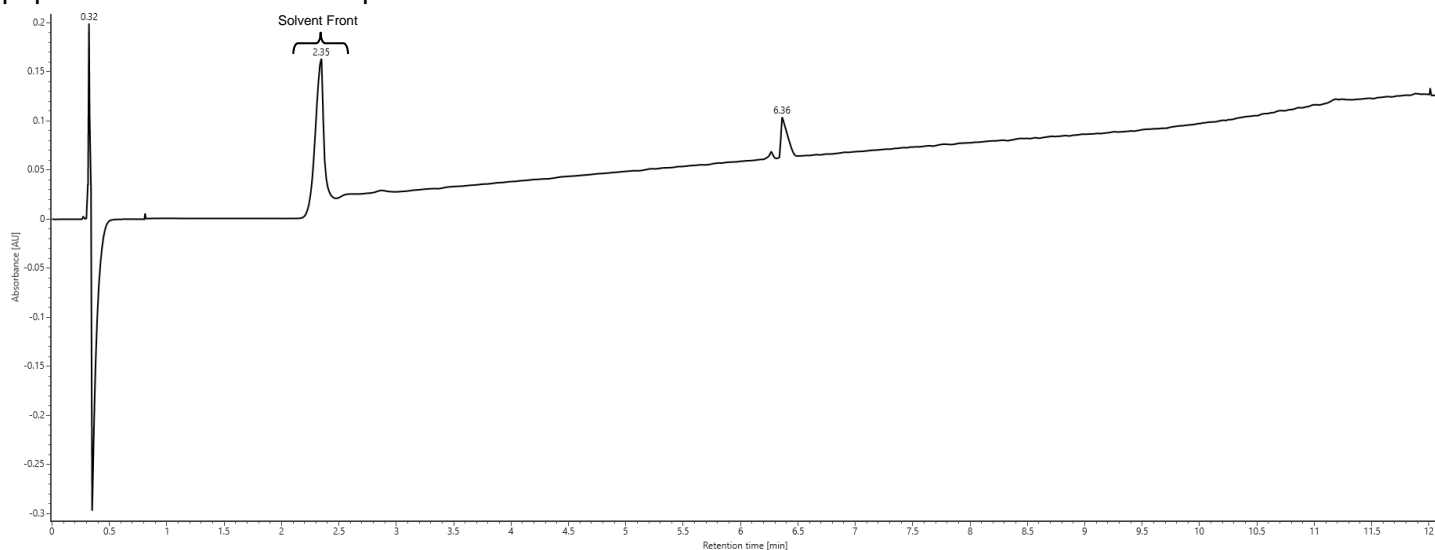

## Synthesis of **15**

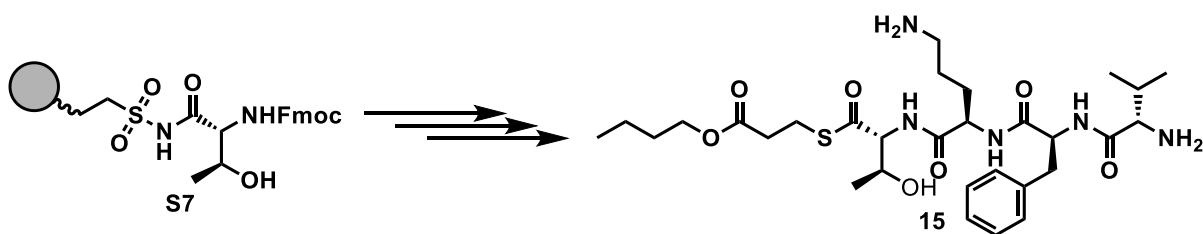

Peptide **15** was synthesized following the general protocol outlined above for the sulfonamide “safety-catch” resin. The synthesis was initiated from **S7** (0.05 mmol) using the following amino acids (Fmoc-D-Orn(Boc)-OH, Fmoc-L-Phe-OH, Boc-L-Val-OH) and butyl 3-mercaptopropionate as the cleaving thiol. The obtained crude peptide was obtained as an off white solid (30.4 mg, 70% yield) analyzed via RP-HPLC and was used in further enzyme assays without further purification.

**<sup>1</sup>H NMR** (800 MHz, DMSO)  $\delta$  8.63 (d,  $J$  = 8.3 Hz, 1H), 8.41 (dd,  $J$  = 9.1, 9.1 Hz, 2H), 7.96 (s, 6H), 7.34 – 7.23 (m, 4H), 7.19 (t,  $J$  = 6.8 Hz, 1H), 5.12 (s, 1H), 4.74 (q,  $J$  = 6.0 Hz, 1H), 4.54 (h,  $J$  = 6.8 Hz, 1H), 4.31 (dd,  $J$  = 3.1, 3.1 Hz, 1H), 4.22 (s, 1H), 4.02 (t,  $J$  = 6.0 Hz, 2H), 3.60 (d,  $J$  = 3.9 Hz, 1H), 3.02 – 2.92 (m, 3H), 2.85 (q,  $J$  = 8.3

Hz, 1H), 2.73 (h,  $J = 7.6$  Hz, 2H), 2.55 (t,  $J = 6.0$  Hz, 2H), 2.07 (h,  $J = 7.0$  Hz, 1H), 1.81 – 1.74 (m, 1H), 1.56 – 1.42 (m, 5H), 1.32 (h,  $J = 6.8$  Hz, 2H), 0.98 (d,  $J = 6.0$  Hz, 3H), 0.91 – 0.86 (m, 6H), 0.84 (d,  $J = 6.0$  Hz, 3H).

$^{13}\text{C}$  NMR (201 MHz, DMSO)  $\delta$  200.6, 172.6, 171.6, 171.0, 168.2, 137.8, 129.6, 128.5, 126.8, 66.4, 64.9, 64.3, 57.4, 54.3, 51.6, 38.7, 38.4, 34.0, 30.5, 30.3, 29.0, 23.8, 23.7, 20.5, 19.0, 18.7, 17.6, 13.9.

**Mass spec:** expected neutral mass for  $\text{C}_{30}\text{H}_{49}\text{N}_5\text{O}_7\text{S}$  (Da): 623.3352, observed neutral mass (Da): 623.3350, mass error (ppm) 0.4.

**UPLC Trace** Obtained using mobile phases of  $\text{H}_2\text{O}+0.1\%$  formic acid (A) and acetonitrile+0.1% formic acid (B). Samples were eluted using a gradient mode with mobile phase B ranging from 0% to 50% over 22 minutes at a flow rate of 1 ml/min. The column was equilibrated with 0% mobile phase B for 3 minutes before and 5 minutes after the gradient. The peptide purity was determined to be 96%

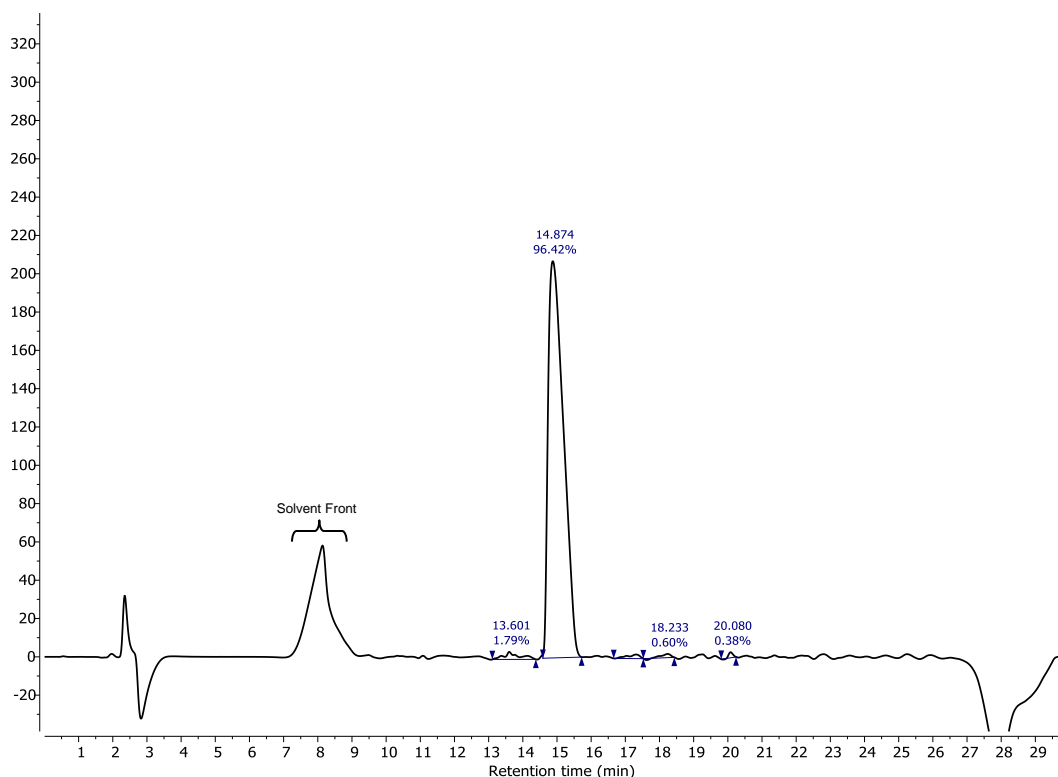

## Synthesis of **16**

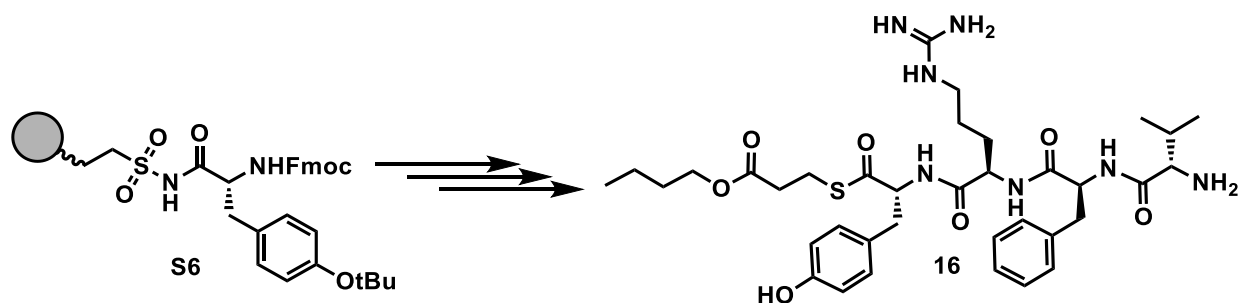

Peptide **16** was synthesized following the general protocol outlined above for the sulfonamide “safety-catch” resin. The synthesis was initiated from 4-sulfamylbutyryl resin preloaded with Fmoc-D-Tyr(tBu)-OH **S6** (0.05 mmol) using the following amino acids (Fmoc-D-Arg(Pbf)-OH, Fmoc-L-Phe-OH, Boc-L-Val-OH) and butyl 3-mercaptopropionate as the cleaving thiol. The obtained crude peptide was obtained as an off white solid (29.6 mg, 61% yield) analyzed via RP-UPLC and was used in further enzyme assays without further purification.

**<sup>1</sup>H NMR** (800 MHz, DMSO) δ 9.32 (s, 1H), 8.68 (s, 1H), 8.54 (d, *J* = 4.5 Hz, 1H), 8.27 (s, 1H), 7.98 (s, 2H), 7.83 (s, 1H), 7.44 (s, 2H), 7.26 (d, *J* = 2.6 Hz, 6H), 7.19 (s, 2H), 6.99 (d, *J* = 5.2 Hz, 3H), 6.64 (d, *J* = 5.9 Hz, 2H), 4.68 (d, *J* = 7.1 Hz, 1H), 4.42 (s, 1H), 4.29 (s, 1H), 3.97 (t, *J* = 7.0 Hz, 2H), 3.58 (t, *J* = 4.0 Hz, 1H), 3.38 (s, 1H), 3.03 – 2.89 (m, 8H), 2.87 (t, *J* = 10.3 Hz, 1H), 2.81 (t, *J* = 10.3 Hz, 1H), 2.06 (d, *J* = 5.7 Hz, 1H), 1.64 (d, *J* = 7.1 Hz, 1H), 1.54 (t, *J* = 7.1 Hz, 3H), 1.43 (dd, *J* = 27.3, 6.4 Hz, 1H), 1.39 (s, 1H), 1.32 (q, *J* = 9.0 Hz, 3H), 1.23 (s, 3H), 0.92 – 0.82 (m, 12H).

**<sup>13</sup>C NMR** (201 MHz, DMSO) δ 200.5, 171.7, 171.5, 170.7, 168.5, 157.3, 156.5, 137.5, 130.3, 129.6, 128.5, 128.1, 127.1, 126.8, 125.8, 115.5, 64.3, 61.4, 57.6, 54.6, 52.1, 40.7, 38.2, 36.5, 34.0, 30.5, 30.4, 29.3, 25.1, 23.7, 19.0, 17.7, 13.9.

**Mass spec:** expected neutral mass for C<sub>36</sub>H<sub>53</sub>N<sub>7</sub>O<sub>7</sub>S (Da): 727.3727, observed neutral mass (Da): 727.3748, mass error (ppm) 2.9.

**HPLC Trace** Obtained using mobile phases of H<sub>2</sub>O+0.1% formic acid (A) and acetonitrile+0.1% formic acid (B). Samples were eluted using a gradient mode with mobile phase B ranging from 0% to 50% over 21 minutes at a flow rate of 1 mL/min. The column was equilibrated with 0% mobile phase B for 3 minutes before and 5 minutes after the gradient. The crude peptide purity was determined to be 96%.

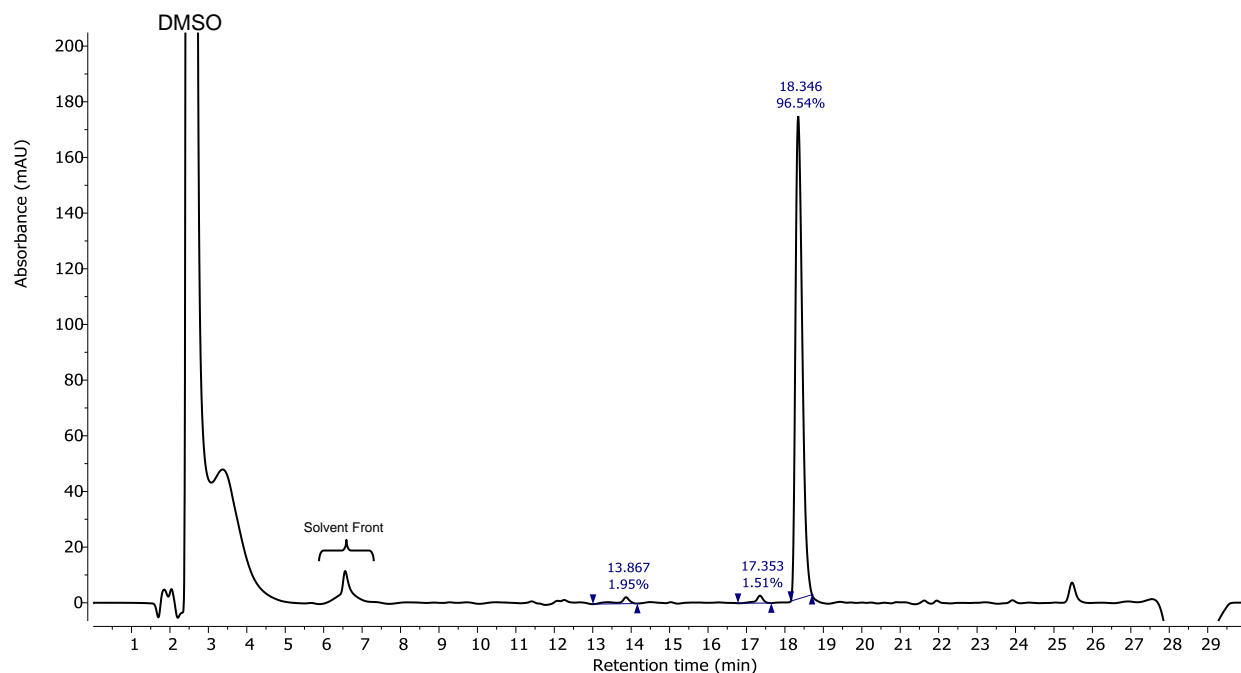

## Synthesis of **17**

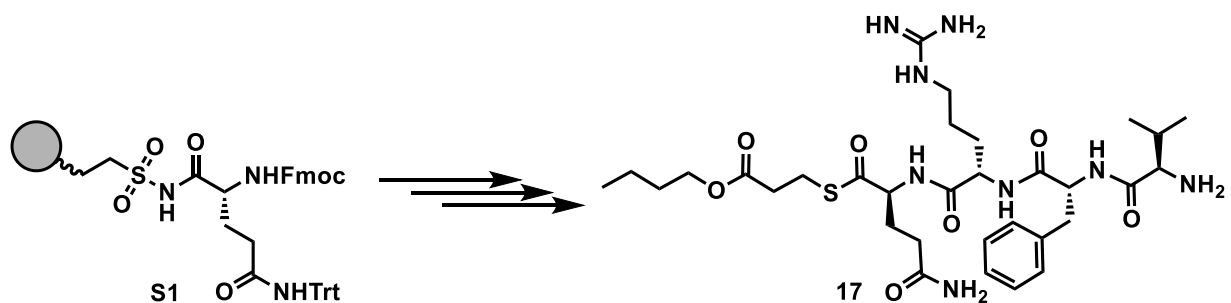

Peptide **17** was synthesized following the general protocol outlined above for the sulfonamide "safety-catch" resin. The synthesis was initiated from **S1** (0.05 mmol) using the following amino acids (Fmoc-D-Arg(Pbf)-OH, Fmoc-L-Phe-OH, Boc-L-Val-OH) and butyl 3-mercaptopropionate as the cleaving thiol. The crude peptide was purified via reverse-phase semi-preparative HPLC using mobile phases of H<sub>2</sub>O+0.05% Trifluoroacetic acid (A)

and acetonitrile+0.05% Trifluoroacetic acid (B). Samples were eluted using a gradient mode with mobile phase B ranging from 0% to 50% over 22 minutes at a flow rate of 20 ml/min. The column was equilibrated with 0% mobile phase B for 1 minute before and 5 minutes after the gradient to yield an off-white solid (7.8 mg, 17% yield).

**<sup>1</sup>H NMR** (800 MHz, DMSO) δ 9.31 (s, 1H), 8.67 (s, 1H), 8.53 (s, 1H), 8.26 (s, 1H), 7.97 (bs, 3H), 7.81 (s, 1H), 7.43 (bs, 2H), 7.24 (d, *J* = 54.6 Hz, 11H), 6.99 (s, 3H), 6.63 (s, 3H), 4.66 (s, 1H), 4.41 (s, 1H), 4.28 (s, 1H), 4.01 (s, 3H), 3.57 (s, 1H), 3.36 (s, 1H), 3.01 – 2.74 (m, 13H), 2.03 (s, 1H), 1.62 (s, 1H), 1.52 (s, 3H), 1.48 – 1.18 (m, 9H), 0.87 (s, 15H).

**<sup>13</sup>C NMR** (201 MHz, DMSO) δ 200.5, 171.7, 171.5, 170.7, 168.5, 157.3, 156.5, 137.5, 130.3, 129.6, 128.5, 128.1, 127.1, 126.8, 125.8, 118.2, 116.7, 115.5, 114.2, 70.2, 65.1, 64.3, 64.0, 61.4, 57.6, 54.6, 52.1, 39.6, 38.2, 36.5, 34.0, 30.4, 29.3, 25.1, 19.0, 17.7, 13.9.

**Mass spec:** expected neutral mass for C<sub>32</sub>HC<sub>52</sub>N<sub>8</sub>O<sub>7</sub>S (Da): 692.3679, observed neutral mass (Da): 692.3686, mass error (ppm) 0.9.

**UPLC Trace** Obtained using mobile phases of H<sub>2</sub>O+0.1% formic acid (A) and acetonitrile+0.1% formic acid (B). Samples were eluted using a gradient mode with mobile phase B ranging from 0% to 40% over 11 minutes at a flow rate of 0.5 ml/min. The column was equilibrated with 0% mobile phase B for 1 minute before and 2 minutes after the gradient. The crude peptide purity was determined to be 98%.

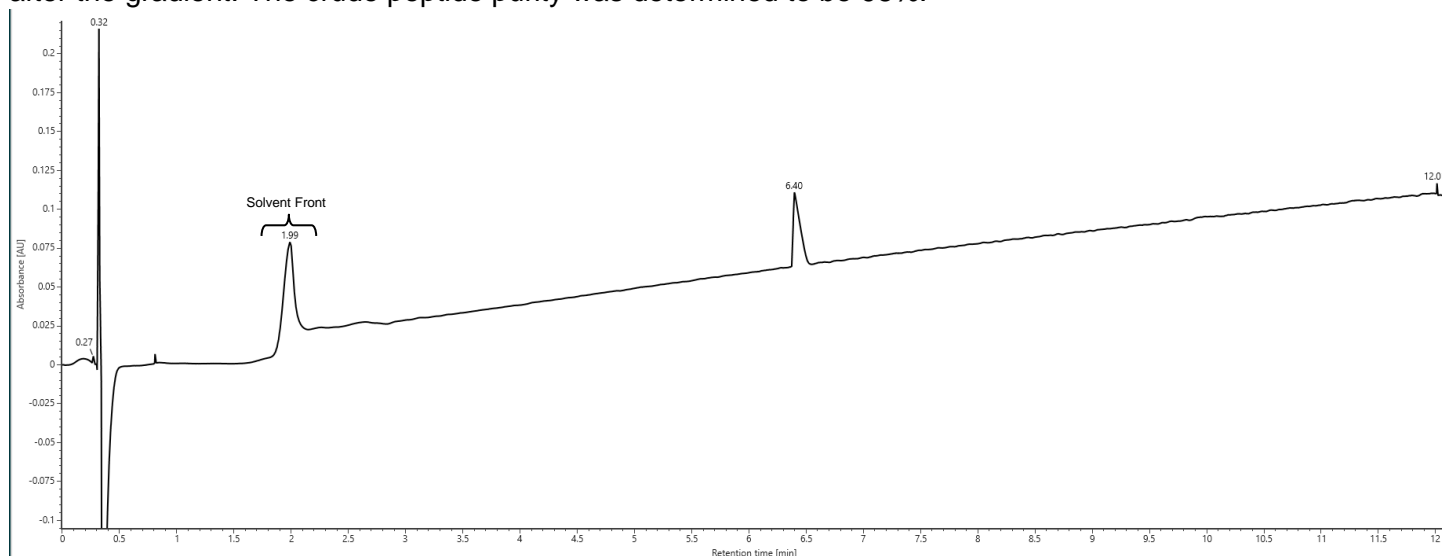

## Synthesis of **18**

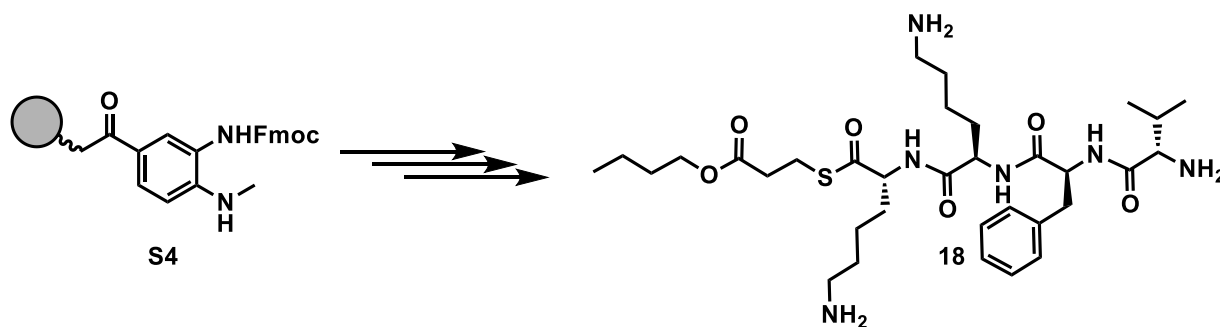

Peptide **14** was synthesized following the general protocol outlined above for the NDbz “safety-catch” resin. The synthesis was initiated from **S4** (0.15 mmol) using the following amino acids (Fmoc-D-Lys(Boc)-OH, Fmoc-D-Lys(Boc)-OH, Fmoc-L-Phe-OH, and Boc-L-Val-OH) and butyl 3-mercaptopropionate as the cleaving thiol. The crude peptide was purified via reverse-phase semi-preparative HPLC using mobile phases of H<sub>2</sub>O+0.05% Trifluoroacetic acid (A) and acetonitrile+0.05% Trifluoroacetic acid (B). Samples were eluted using a gradient mode with mobile phase B ranging from 0% to 50% over 22 minutes at a flow rate of 20 mL/min. The column was equilibrated with 0% mobile phase B for 1 minute before and 5 minutes after the gradient to yield an off-white solid (2.31 mg, 2% yield).

**<sup>1</sup>H NMR** (800 MHz, DMSO)  $\delta$  8.64 (d,  $J$  = 8.0 Hz, 1H), 8.29 (dd,  $J$  = 8.9, 8.3 Hz, 1H), 8.03 (s, 2H), 7.92 – 7.65 (m, 6H), 7.27 (d,  $J$  = 5.6 Hz, 3H), 7.21 (s, 2H), 4.68 (p,  $J$  = 7.5 Hz, 1H), 4.30 – 4.19 (m, 1H), 4.13 (s, 1H), 4.02 (q,  $J$  = 6.2 Hz, 1H), 3.65 – 3.51 (m, 1H), 3.51 (d,  $J$  = 505.9 Hz, 1H), 2.99 – 2.89 (m, 2H), 2.87 (d,  $J$  = 253.5 Hz, 1H), 2.76 – 2.57 (m, 3H), 2.54 (d,  $J$  = 386.2 Hz, 1H), 2.04 (h, 1H), 1.65 – 1.60 (m, 1H), 1.60 – 1.55 (m, 1H), 1.55 – 1.47 (m, 4H), 1.43 (h, 3H), 1.37 – 1.12 (m, 6H), 1.09 – 0.94 (m, 2H), 0.92 – 0.75 (m, 9H).

**<sup>13</sup>C NMR** (201 MHz, DMSO)  $\delta$  201.31, 158.55, 158.40, 137.52, 129.62, 128.52, 126.83, 118.40, 116.91, 70.17, 64.29, 59.40, 57.48, 54.47, 52.22, 39.07, 39.02, 38.85, 38.40, 34.02, 31.42, 30.76, 30.50, 30.33, 27.04, 26.83, 23.64, 22.50, 22.40, 18.97, 18.73, 17.79, 13.94

**Mass spec:** expected neutral mass for C<sub>33</sub>H<sub>56</sub>N<sub>6</sub>O<sub>6</sub>S (Da): 664.3982, observed neutral mass (Da): 664.3973, mass error (ppm) 1.3.

**UPLC Trace** Obtained using mobile phases of H<sub>2</sub>O+0.1% formic acid (A) and acetonitrile+0.1% formic acid (B). Samples were eluted using a gradient mode with mobile phase B ranging from 0% to 60% over 11 minutes at a flow rate of 0.5 ml/min. The column was equilibrated with 0% mobile phase B for 1 minute before and 2 minutes after the gradient.

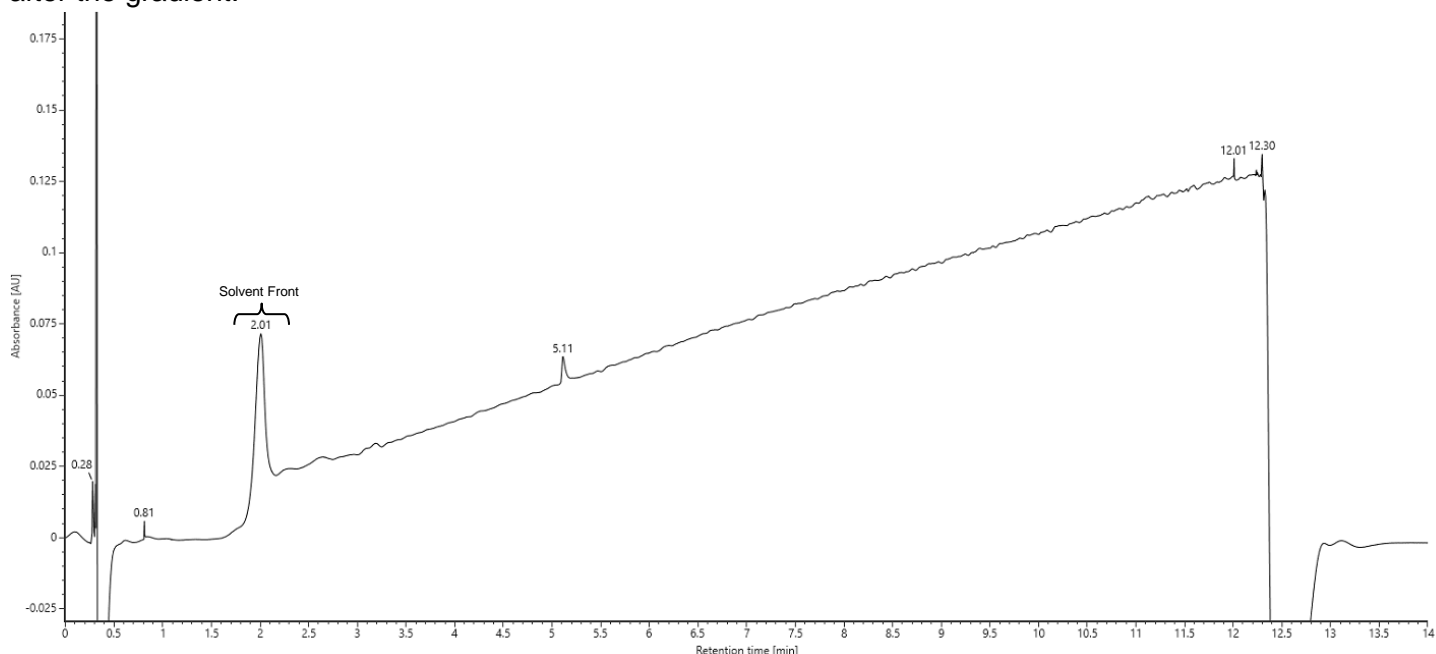

## Synthesis of **19**

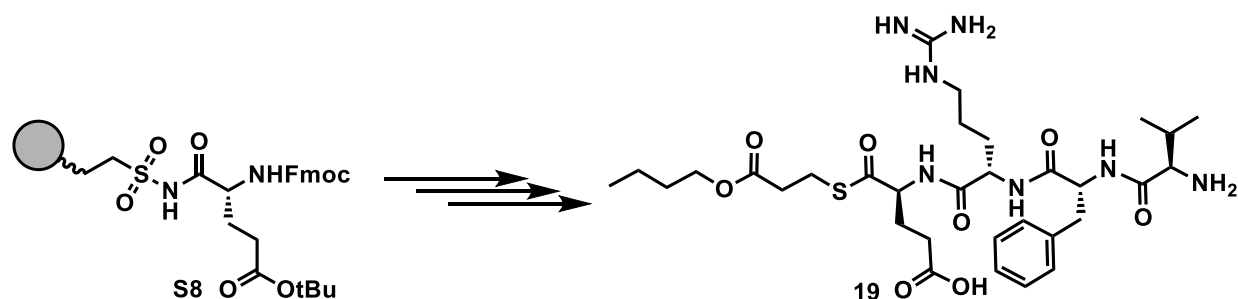

Using the general protocol described above for the sulfonamide "safety-catch" resin, Peptide **19** was synthesized by initiating the synthesis from **S9** (0.05 mmol) and coupling the following amino acids in the order of Fmoc-D-Arg(Pbf)-OH, Fmoc-L-Phe-OH, and Boc-L-Val-OH. Butyl 3-mercaptopropionate was used as the cleaving thiol. The crude peptide was obtained as an off-white solid with a yield of 36% (16.4 mg) and was analyzed via RP-HPLC. The peptide was used in further enzyme assays without additional purification.

**<sup>1</sup>H NMR** (800 MHz, DMSO)  $\delta$  8.66 (d,  $J$  = 7.9 Hz, 1H), 8.60 (d,  $J$  = 6.1 Hz, 1H), 8.33 (d,  $J$  = 8.2 Hz, 1H), 7.80 (s, 1H), 7.26 (t,  $J$  = 6.1 Hz, 5H), 7.21 – 7.18 (m, 1H), 7.15 (s, 1H), 4.67 (q,  $J$  = 7.9 Hz, 1H), 4.36 – 4.30 (m, 1H),



4.30 – 4.23 (m, 1H), 4.02 (t,  $J = 6.8$  Hz, 2H), 3.58 – 3.46 (m, 1H), 3.07 – 2.90 (m, 5H), 2.87 (q,  $J = 8.2$  Hz, 1H), 2.54 (t,  $J = 7.1$  Hz, 2H), 2.31 – 2.20 (m, 2H), 2.05 – 1.92 (m, 2H), 1.82 – 1.74 (m, 1H), 1.74 – 1.66 (m, 1H), 1.53 (p,  $J = 6.1$  Hz, 2H), 1.47 – 1.35 (m, 2H), 1.32 (hept,  $J = 7.5$  Hz, 2H), 1.25 (p,  $J = 6.8$  Hz, 2H), 0.90 – 0.86 (m, 6H), 0.84 (d,  $J = 6.7$  Hz, 3H).

$^{13}\text{C}$  NMR (201 MHz, DMSO)  $\delta$  200.6, 173.9, 171.7, 171.1, 170.4, 168.6, 156.9, 137.1, 129.2, 128.1, 126.4, 63.9, 58.6, 57.5, 54.2, 51.7, 40.3, 37.9, 33.6, 30.1, 30.1, 29.9, 28.6, 26.4, 24.8, 23.3, 18.6, 18.5, 17.3, 13.5.

**Mass spec:** expected neutral mass for  $\text{C}_{32}\text{H}_{51}\text{N}_7\text{O}_8\text{S}$  (Da): 693.3520, observed neutral mass (Da): 693.3529, mass error (ppm) 1,3.

**HPLC Trace** Obtained using mobile phases of  $\text{H}_2\text{O}+0.1\%$  formic acid (A) and acetonitrile+0.1% formic acid (B). Samples were eluted using a gradient mode with mobile phase B ranging from 0% to 60% over 52 minutes at a flow rate of 1 ml/min. The column was equilibrated with 0% mobile phase B for 3 minutes before and 5 minutes after the gradient. The crude peptide purity was determined to be >99%.

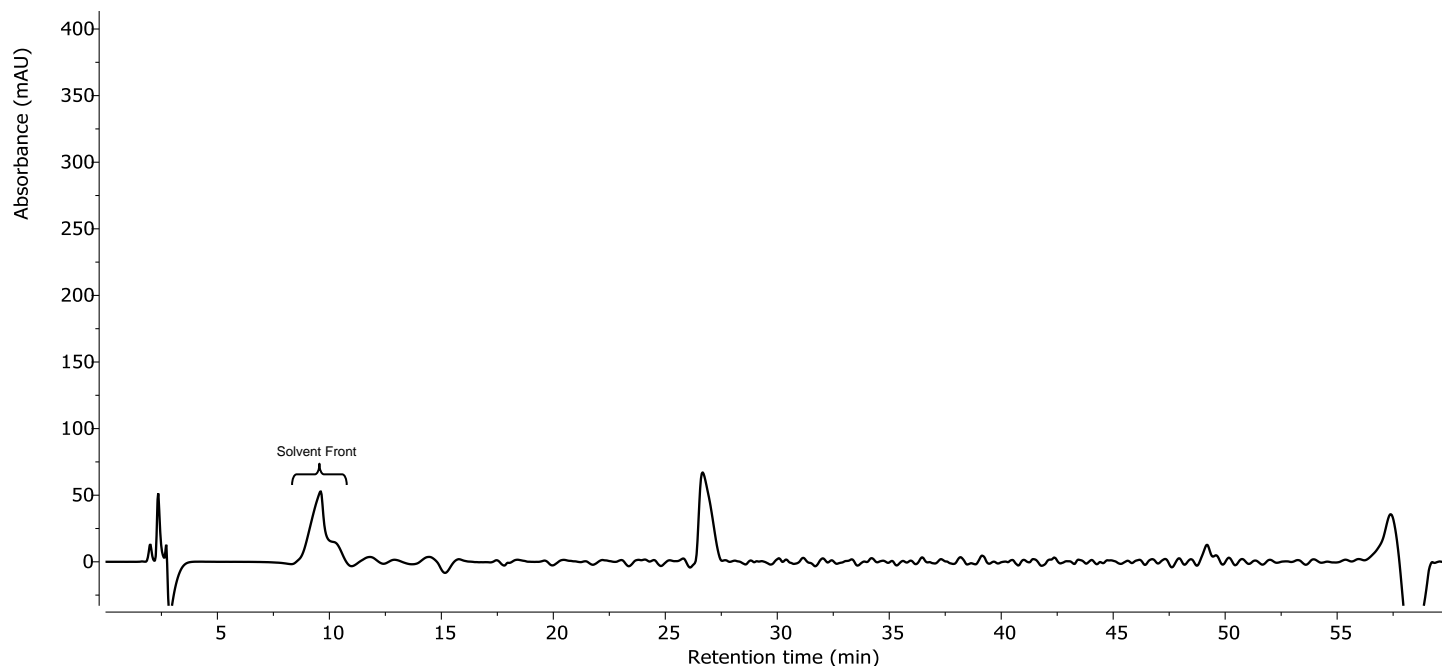

## Synthesis of **20**

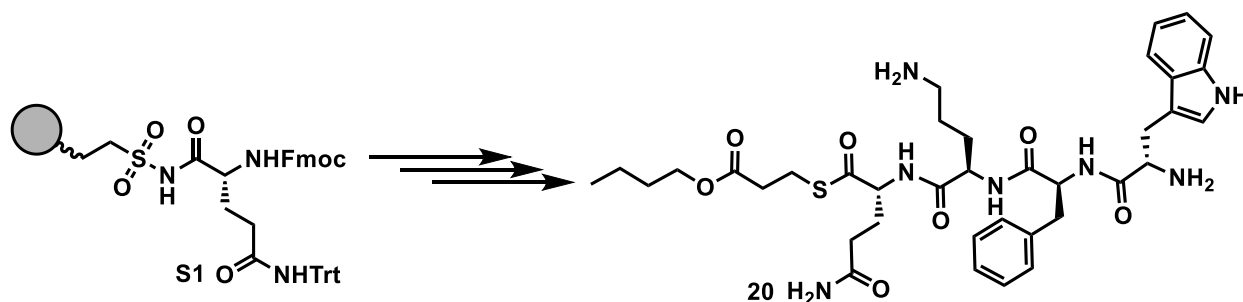

Peptide **20** was synthesized following the general protocol outlined above for the sulfonamide “safety-catch” resin. The synthesis was initiated from **S1** (0.05 mmol) using the following amino acids Fmoc-D-Orn(Boc)-OH, Fmoc-L-Phe-OH, Boc-L-Trp(Boc)-OH and butyl 3-mercaptopropionate as the cleaving thiol. The crude peptide was purified via reverse-phase semi-preparative HPLC using mobile phases of  $\text{H}_2\text{O}+0.05\%$  Formic Acid (A) and acetonitrile+0.05% Formic Acid (B). Samples were eluted using a gradient mode with mobile phase B ranging

from 0% to 50% over 22 minutes at a flow rate of 20 mL/min. The column was equilibrated with 0% mobile phase B for 1 minute before and 5 minutes after the gradient to yield an off-white solid (3.5 mg, 8% yield).

**Mass spec:** expected neutral mass for  $C_{37}H_{51}N_7O_7S$  (Da): 737.3571, observed neutral mass (Da): 737.3567, mass error (ppm) 0.5.

**UPLC Trace** Obtained using mobile phases of  $H_2O+0.1\%$  formic acid (A) and acetonitrile+0.1% formic acid (B). Samples were eluted using a gradient mode with mobile phase B ranging from 0% to 40% over 11 minutes at a flow rate of 0.5 ml/min. The column was equilibrated with 0% mobile phase B for 1 minute before and 2 minutes after the gradient. The peptide purity was determined to be 98%.

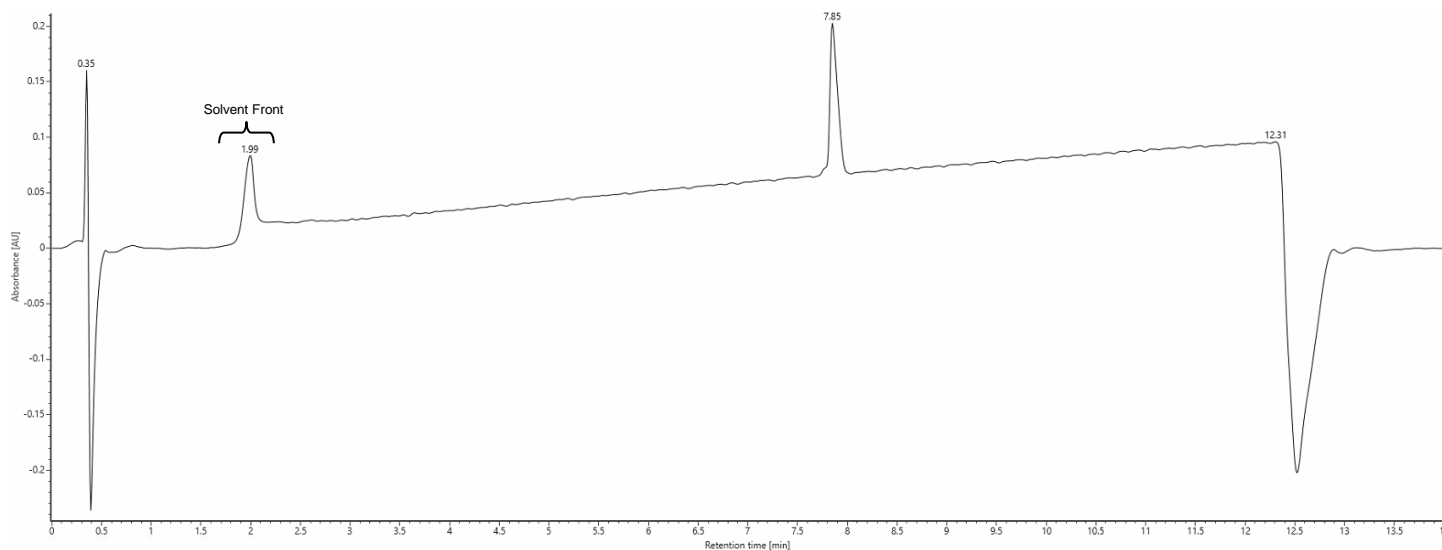

## Synthesis of **21**

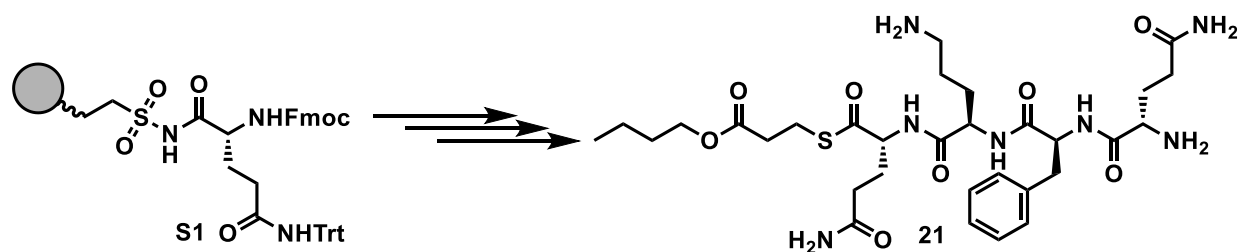

Peptide **21** was synthesized following the general protocol outlined above for the sulfonamide “safety-catch” resin. The synthesis was initiated from **S1** (0.05 mmol) using the following amino acids Fmoc-D-Orn(Boc)-OH, Fmoc-L-Phe-OH, Boc-L-Gln(Trt)-OH and butyl 3-mercaptopropionate as the cleaving thiol. The crude peptide was obtained as an off white solid (28.1 mg, 62% yield) analyzed via RP-HPLC and was used in further enzyme assays without further purification.

**$^1H$  NMR** (800 MHz, DMSO)  $\delta$  8.79 (d,  $J = 8.4$  Hz, 1H), 8.65 (d,  $J = 7.6$  Hz, 1H), 8.54 (d,  $J = 8.4$  Hz, 1H), 7.99 (s, 5H), 7.43 (s, 1H), 7.36 – 7.07 (m, 6H), 7.00 (s, 1H), 6.81 (s, 1H), 4.65 (q,  $J = 3.7$  Hz, 1H), 4.37 (dt,  $J = 37.4, 5.5$  Hz, 2H), 4.02 (t,  $J = 6.8$  Hz, 2H), 3.77 (d,  $J = 5.5$  Hz, 1H), 3.09 – 2.86 (m, 3H), 2.82 (dd,  $J = 195.6, 14.4$  Hz, 1H), 2.74 (s, 2H), 2.55 (t,  $J = 6.8$  Hz, 2H), 2.33 – 2.18 (m, 2H), 2.15 (s, 2H), 2.00 – 1.81 (m, 3H), 1.78 (q,  $J = 4.7$  Hz, 2H), 1.53 (p,  $J = 7.0$  Hz, 5H), 1.31 (p,  $J = 7.8$  Hz, 2H), 1.10 (s, 1H), 0.88 (t,  $J = 7.6$  Hz, 3H).

$^{13}\text{C}$  NMR (201 MHz, DMSO)  $\delta$  200.8, 173.9, 173.4, 171.7, 171.2, 170.9, 168.6, 137.5, 129.3, 128.2, 126.5, 69.8, 63.9, 58.9, 54.5, 51.7, 51.6, 38.5, 37.8, 33.7, 30.8, 30.5, 30.2, 28.8, 27.2, 27.0, 26.9, 23.5, 23.3, 18.6, 13.6.

**Mass spec:** expected neutral mass for  $\text{C}_{31}\text{H}_{49}\text{N}_7\text{O}_8\text{S}$  (Da): 679.3363, observed neutral mass (Da): 679.3366, mass error (ppm) 0.4.

**HPLC Trace** Obtained using mobile phases of  $\text{H}_2\text{O}+0.1\%$  formic acid (A) and acetonitrile+0.1% formic acid (B). Samples were eluted using a gradient mode with mobile phase B ranging from 0% to 50% over 22 minutes at a flow rate of 1 ml/min. The column was equilibrated with 0% mobile phase B for 3 minutes before and 5 minutes after the gradient. The peptide purity was determined to be 98%.

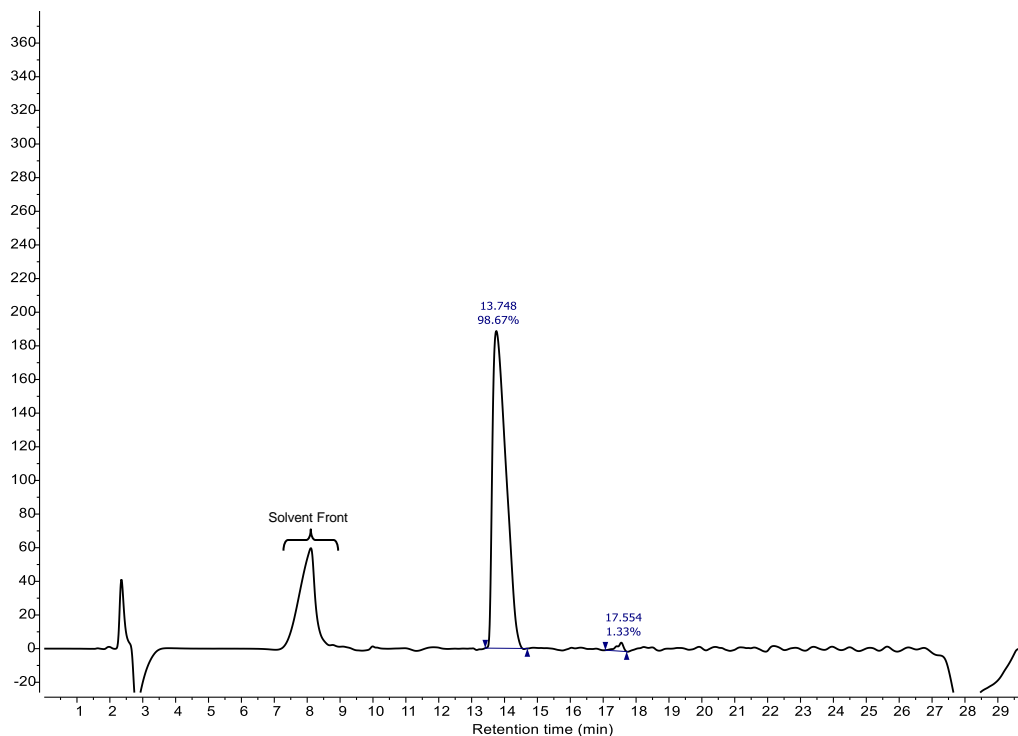

## Synthesis of **22**

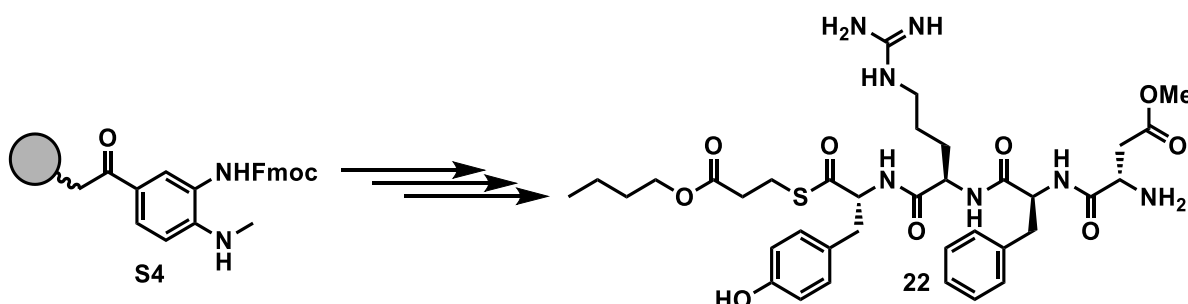

Peptide **22** was synthesized using the NDbz "safety-catch" resin. The synthesis was initiated from Fmoc-MeDbz-OH loaded resin **S4** (0.15 mmol) and involved the following amino acids: Fmoc-D-Tyr(tBu)-OH, Fmoc-D-Arg(Pbf)-OH, Fmoc-L-Phe-OH, Boc-L-Asp(OMe)-OH. Butyl 3-mercaptopropionate was used as the cleaving thiol. The crude peptide was purified via reverse-phase semi-preparative HPLC using mobile phases of acetonitrile+0.05% TFA (B) and  $\text{H}_2\text{O}+0.05\%$  TFA (A). Samples were eluted using a gradient mode with mobile phase B ranging from 0% to 50% over 22 minutes at a flow rate of 20 mL/min. The column was equilibrated with 0% mobile phase B for 5 minutes after and 1 minute before the gradient to yield an off-white solid (65.2 mg, 44% yield).

$^1\text{H}$  NMR (800 MHz, DMSO)  $\delta$  9.32 (s, 1H), 8.73 (d,  $J = 8.7$  Hz, 1H), 8.58 (d,  $J = 7.3$  Hz, 1H), 8.30 (d,  $J = 8.8$  Hz, 1H), 8.22 (s, 2H), 7.80 (t,  $J = 6.7$  Hz, 1H), 7.44 (s, 1H), 7.28 – 7.24 (m, 4H), 7.21 – 7.18 (m, 1H), 7.00 (d,  $J = 8.1$  Hz, 2H), 6.66 (d,  $J = 8.8$  Hz, 2H), 4.65 (q,  $J = 8.1$  Hz, 1H), 4.43 (q,  $J = 8.1$  Hz, 1H), 4.32 (h,  $J = 5.1$  Hz,

<sup>1</sup>H), 4.09 (dd, *J* = 4.5, 3.7 Hz, 1H), 4.02 (t, *J* = 6.7 Hz, 2H), 3.61 (s, 3H), 3.12 – 2.84 (m, 7H), 2.84 – 2.75 (m, 3H), 2.52 (t, *J* = 6.7 Hz, 2H), 1.73 – 1.64 (m, 1H), 1.58 (p, *J* = 7.3 Hz, 2H), 1.46 (h, *J* = 9.6 Hz, 1H), 1.36 – 1.21 (m, 4H), 0.88 (t, *J* = 6.7 Hz, 3H).

<sup>13</sup>C NMR (201 MHz, DMSO) δ 200.53, 171.82, 171.53, 170.58, 170.01, 167.86, 157.27, 156.49, 137.57, 130.38, 129.58, 128.52, 127.08, 126.82, 115.48, 64.30, 61.45, 54.80, 52.41, 52.07, 49.04, 40.77, 38.20, 36.58, 35.81, 33.99, 30.51, 29.46, 25.16, 23.68, 18.97, 13.92.

**Mass spec:** expected neutral mass for C<sub>36</sub>H<sub>51</sub>N<sub>7</sub>O<sub>9</sub>S (Da): 757.3469, observed neutral mass (Da): 757.3480, mass error (ppm) 1.5.

**UPLC Trace** Obtained using mobile phases of H<sub>2</sub>O+0.1% formic acid (A) and acetonitrile+0.1% formic acid (B). Samples were eluted using a gradient mode with mobile phase B ranging from 0% to 40% over 11 minutes at a flow rate of 0.5 ml/min. The column was equilibrated with 0% mobile phase B for 1 minute before and 2 minutes after the gradient. The crude peptide purity was determined to be 96%.

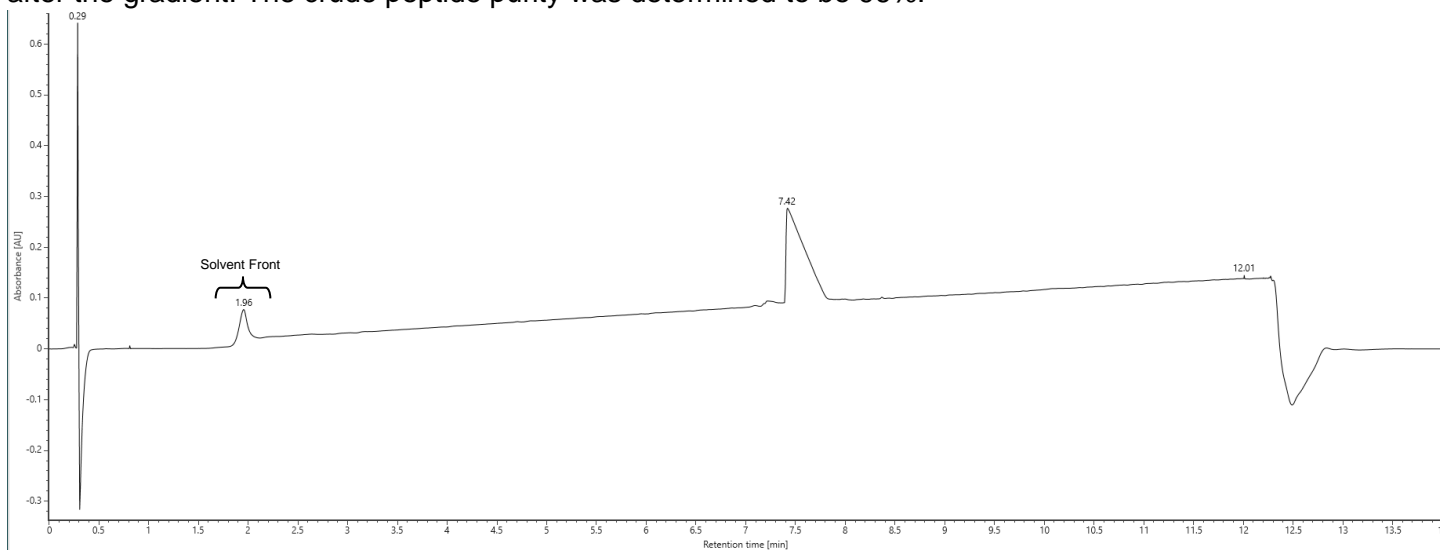

### Synthesis of **23**

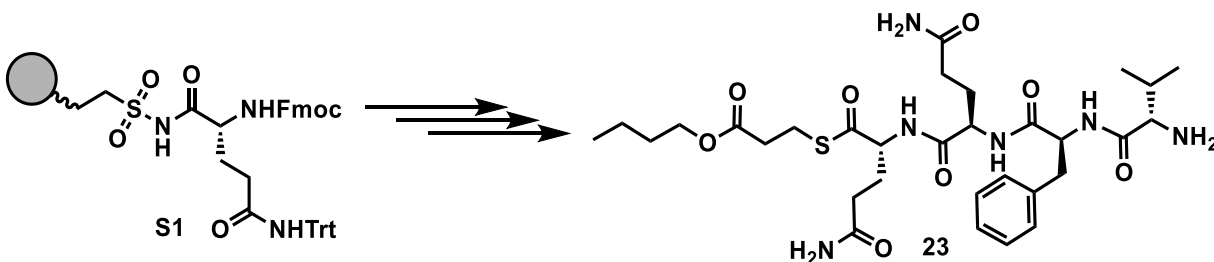

Peptide **23** was synthesized following the general protocol outlined above for the sulfonamide “safety-catch” resin. The synthesis was initiated from **S1** (0.05 mmol) using the following amino acids Fmoc-D-Gln(Trt)-OH, Fmoc-L-Phe-OH, Boc-L-Val-OH and butyl 3-mercaptopropionate as the cleaving thiol. The crude peptide was obtained as an off white solid (18.5 mg, 48% yield) analyzed via RP-HPLC and was used in further enzyme assays without further purification.

<sup>1</sup>H NMR (800 MHz, DMSO) δ 8.65 (d, *J* = 7.8 Hz, 1H), 8.53 (d, *J* = 5.6 Hz, 1H), 8.36 (d, *J* = 7.0 Hz, 1H), 7.94 (s, 2H), 7.27 (t, *J* = 7.1 Hz, 5H), 7.16 (d, *J* = 29.0 Hz, 2H), 6.75 (d, *J* = 43.0 Hz, 2H), 4.64 (dd, *J* = 490.4, 4.0 Hz, 1H), 4.29 (s, 2H), 4.01 (t, *J* = 6.2 Hz, 2H), 3.59 (s, 1H), 3.50 (s, 1H), 3.35 (s, 1H), 3.07 – 2.93 (m, 3H), 2.87 (q, *J* = 7.0 Hz, 1H), 2.54 (t, *J* = 5.4 Hz, 2H), 2.20 – 2.02 (m, 3H), 1.94 (t, *J* = 16.4 Hz, 4H), 1.80 (s, 1H), 1.67 (t, *J* = 7.0 Hz, 1H), 1.54 (q, *J* = 7.8 Hz, 2H), 1.31 (p, *J* = 5.4 Hz, 2H), 0.99 – 0.64 (m, 10H).

$^{13}\text{C}$  NMR (201 MHz, DMSO)  $\delta$  200.8, 173.6, 173.4, 171.7, 171.2, 170.4, 168.2, 137.3, 129.3, 128.2, 126.5, 69.8, 63.9, 58.9, 57.2, 54.4, 52.0, 37.7, 33.7, 31.3, 31.0, 30.1, 30.0, 27.5, 27.1, 23.3, 18.6, 18.5, 17.3, 13.6, 13.6.

**Mass spec:** expected neutral mass for  $\text{C}_{31}\text{H}_{48}\text{N}_6\text{O}_8\text{S}$  (Da): 664.3254, observed neutral mass (Da): 664.3247, mass error (ppm) 1.1.

**HPLC Trace** Obtained using mobile phases of  $\text{H}_2\text{O}+0.1\%$  formic acid (A) and acetonitrile+0.1% formic acid (B). Samples were eluted using a gradient mode with mobile phase B ranging from 0% to 50% over 22 minutes at a flow rate of 1 ml/min. The column was equilibrated with 0% mobile phase B for 3 minutes before and 5 minutes after the gradient. The crude peptide purity was determined to be >99%

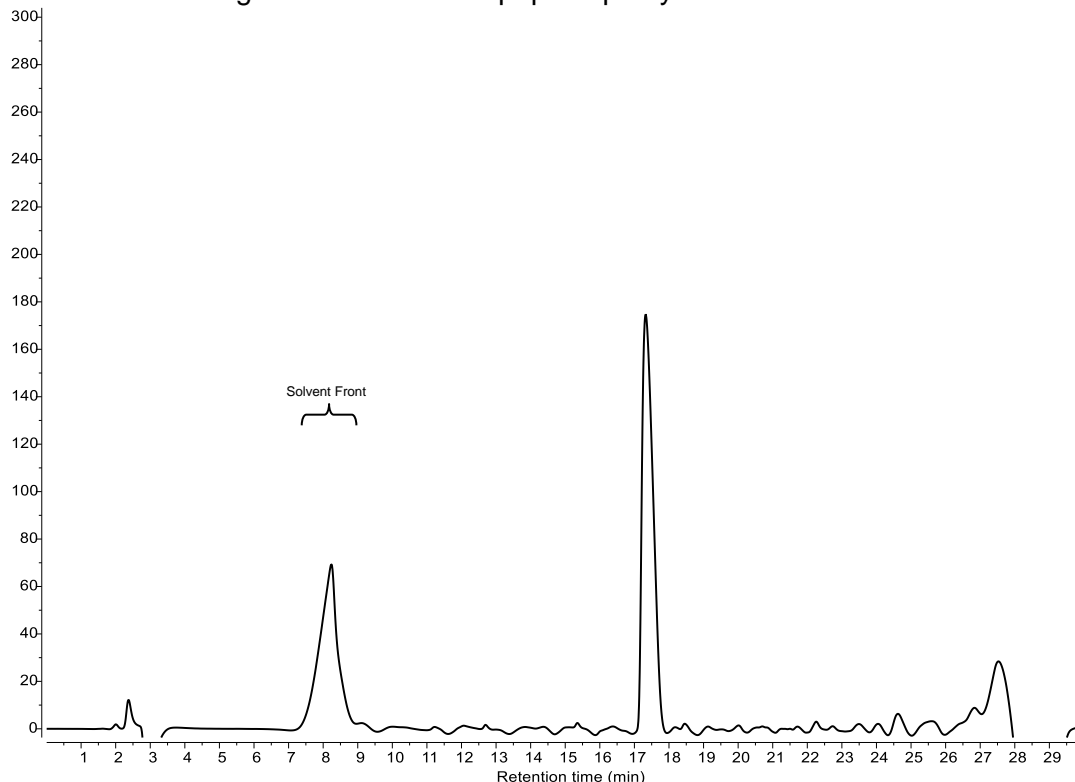

## Synthesis of **24**

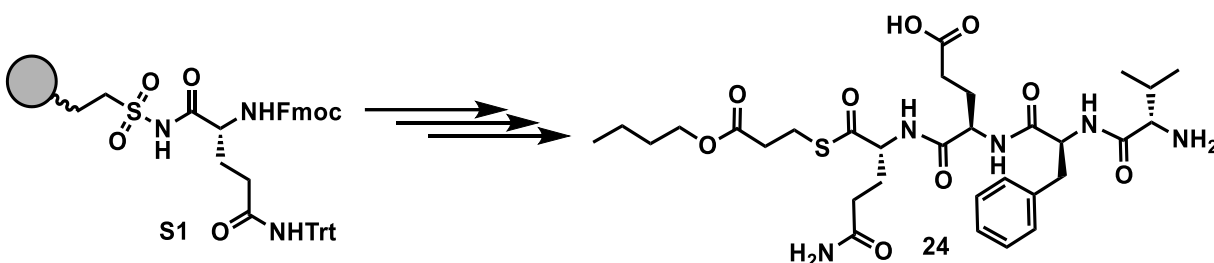

Peptide **24** was synthesized following the general protocol outlined above for the sulfonamide “safety-catch” resin. The synthesis was initiated from **S1** (0.05 mmol) using the following amino acids Fmoc-D-Glu(tBu)-OH, Fmoc-L-Phe-OH, Boc-L-Val-OH and butyl 3-mercaptopropionate as the cleaving thiol. The crude peptide was obtained as an off white solid (11.2 mg, 28% yield) analyzed via RP-HPLC and was used in further enzyme assays without further purification.

$^1\text{H}$  NMR (800 MHz, DMSO)  $\delta$  8.64 (s, 1H), 8.51 (d,  $J = 48.7$  Hz, 2H), 7.26 (d,  $J = 57.6$  Hz, 6H), 6.82 (s, 1H), 4.61 (s, 1H), 4.30 (d,  $J = 19.3$  Hz, 2H), 4.01 (d,  $J = 3.8$  Hz, 2H), 3.55 (d,  $J = 31.7$  Hz, 2H), 2.97 (d,  $J = 59.3$  Hz, 4H), 2.54 (d,  $J = 3.6$  Hz, 2H), 2.13 (s, 2H), 2.03 (s, 3H), 1.93 (s, 2H), 1.81 (s, 1H), 1.69 (s, 1H), 1.52 (t,  $J = 10.2$  Hz, 4H), 1.31 (dd,  $J = 334.3, 5.3$  Hz, 2H), 0.88 (d,  $J = 30.4$  Hz, 9H).

$^{13}\text{C}$  NMR (201 MHz, DMSO)  $\delta$  201.2, 174.4, 173.8, 171.9, 171.5, 170.7, 169.0, 137.6, 129.6, 128.5, 126.8, 70.2, 64.3, 59.3, 57.8, 54.8, 52.0, 38.0, 34.0, 31.4, 30.5, 30.4, 27.4, 27.2, 23.6, 19.0, 18.9, 17.6, 13.9.

**Mass spec:** expected neutral mass for C<sub>31</sub>H<sub>47</sub>N<sub>5</sub>O<sub>9</sub>S (Da): 665.3094, observed neutral mass (Da): 665.3090, mass error (ppm) 0.7.

**HPLC Trace** Obtained using mobile phases of H<sub>2</sub>O+0.1% formic acid (A) and acetonitrile+0.1% formic acid (B). Samples were eluted using a gradient mode with mobile phase B ranging from 0% to 50% over 22 minutes at a flow rate of 1 ml/min. The column was equilibrated with 0% mobile phase B for 3 minutes before and 5 minutes after the gradient. The crude peptide purity was determined to be >99%

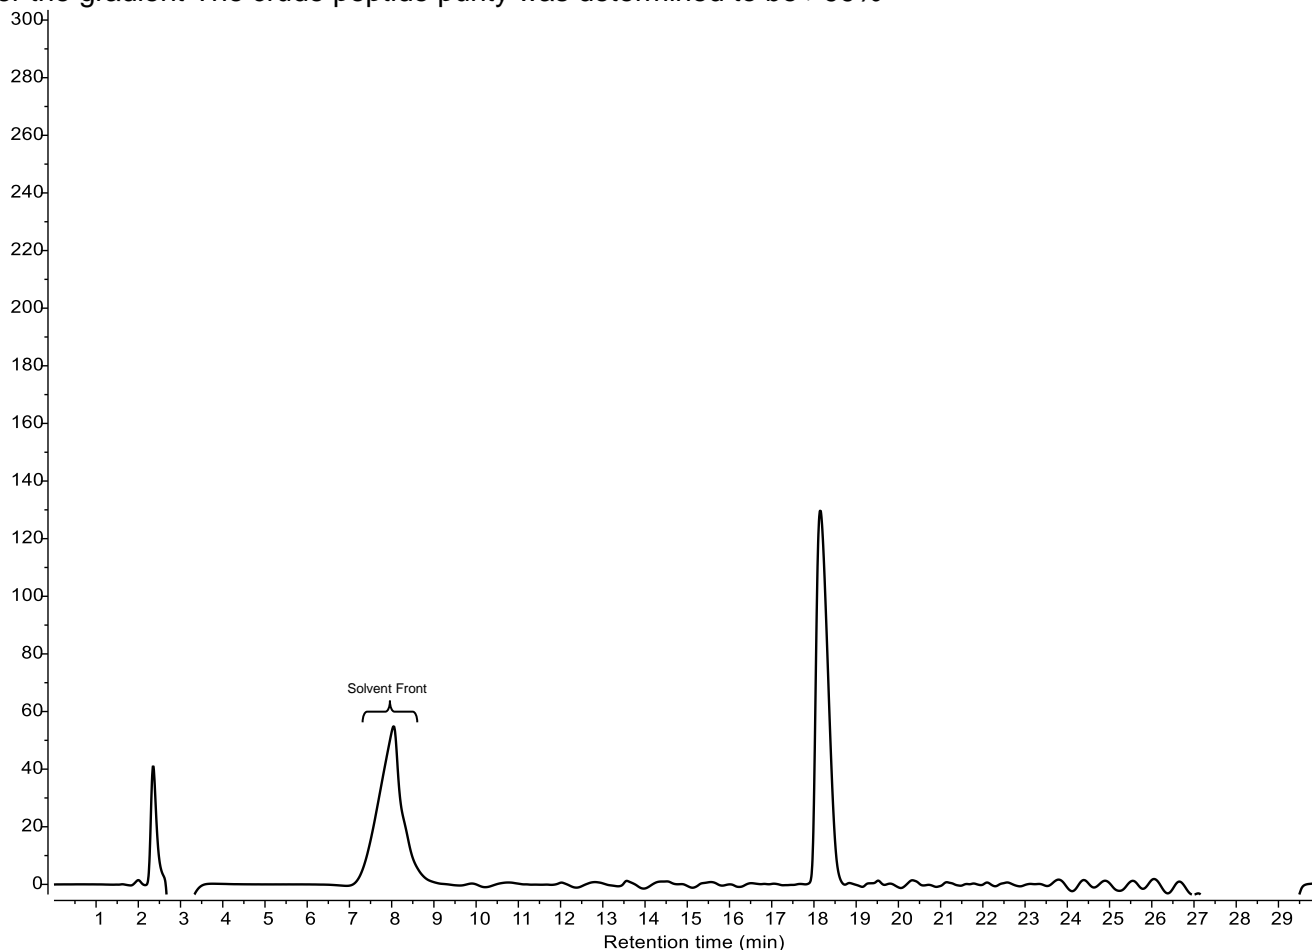

### Synthesis of **25**

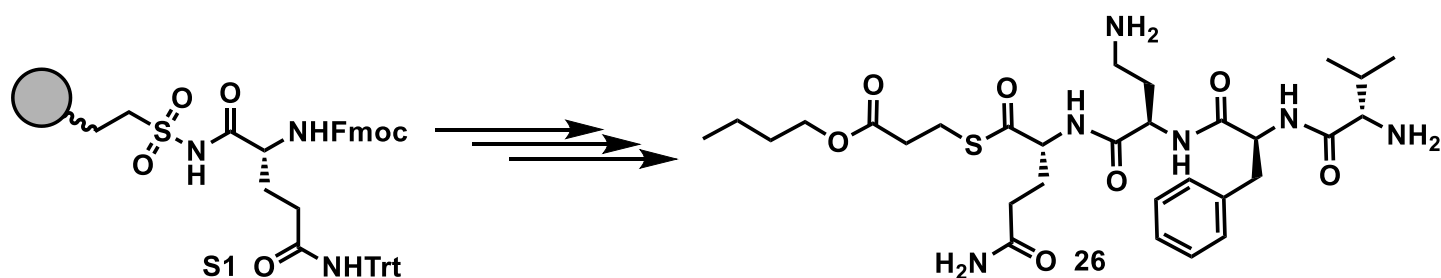

Peptide **25** was synthesized following the general protocol outlined above for the sulfonamide “safety-catch” resin. The synthesis was initiated from **S1** (0.05 mmol) using the following amino acids (Fmoc-D-Dab(Boc)-OH, Fmoc-L-Phe-OH, Boc-L-Val-OH) and butyl 3-mercaptopropionate as the cleaving thiol. The obtained crude peptide was obtained as an off white solid (23.3 mg, 54% yield) analyzed via RP-HPLC and was used in further enzyme assays without further purification.

**<sup>1</sup>H NMR** (800 MHz, DMSO)  $\delta$  8.75 (t,  $J$  = 6.5 Hz, 1H), 8.56 (t,  $J$  = 9.4 Hz, 2H), 7.98 (s, 5H), 7.34 – 7.11 (m, 6H), 6.83 (s, 1H), 4.61 (p,  $J$  = 6.8 Hz, 1H), 4.39 (p,  $J$  = 4.6 Hz, 1H), 4.29 (p,  $J$  = 3.6 Hz, 1H), 4.02 (q,  $J$  = 5.6 Hz, 2H),

3.61 (t,  $J = 2.7$  Hz, 1H), 2.97 (d,  $J = 3.9$  Hz, 3H), 2.91 – 2.82 (m, 1H), 2.66 – 2.57 (m, 1H), 2.57 – 2.51 (m, 2H), 2.21 – 2.08 (m, 2H), 2.06 (h,  $J = 4.8$  Hz, 1H), 2.02 – 1.88 (m, 2H), 1.87 – 1.78 (m, 1H), 1.78 – 1.68 (m, 1H), 1.56 – 1.41 (m, 3H), 1.31 (h,  $J = 6.5$  Hz, 2H), 1.06 (d,  $J = 3.9$  Hz, 1H), 0.91 (t,  $J = 5.8$  Hz, 2H), 0.88 (t,  $J = 6.8$  Hz, 6H).  
 $^{13}\text{C}$  NMR (201 MHz, DMSO)  $\delta$  200.5, 173.4, 171.1, 170.9, 170.7, 168.3, 137.1, 129.2, 128.2, 126.6, 64.0, 59.1, 57.2, 54.5, 50.0, 48.7, 37.5, 36.0, 33.6, 31.0, 30.1, 30.0, 29.6, 27.1, 26.8, 23.2, 18.6, 18.4, 17.4, 13.6.

**Mass spec:** expected neutral mass for  $\text{C}_{30}\text{H}_{48}\text{N}_6\text{O}_7\text{S}$  (Da): 636.3305, observed neutral mass (Da): 636.3310, mass error (ppm) 0.8.

**UPLC Trace** Obtained using mobile phases of  $\text{H}_2\text{O}+0.1\%$  formic acid (A) and acetonitrile+0.1% formic acid (B). Samples were eluted using a gradient mode with mobile phase B ranging from 0% to 40% over 11 minutes at a flow rate of 0.5 ml/min. The column was equilibrated with 0% mobile phase B for 1 minute before and 2 minutes after the gradient. The crude peptide purity was determined to be 99%.

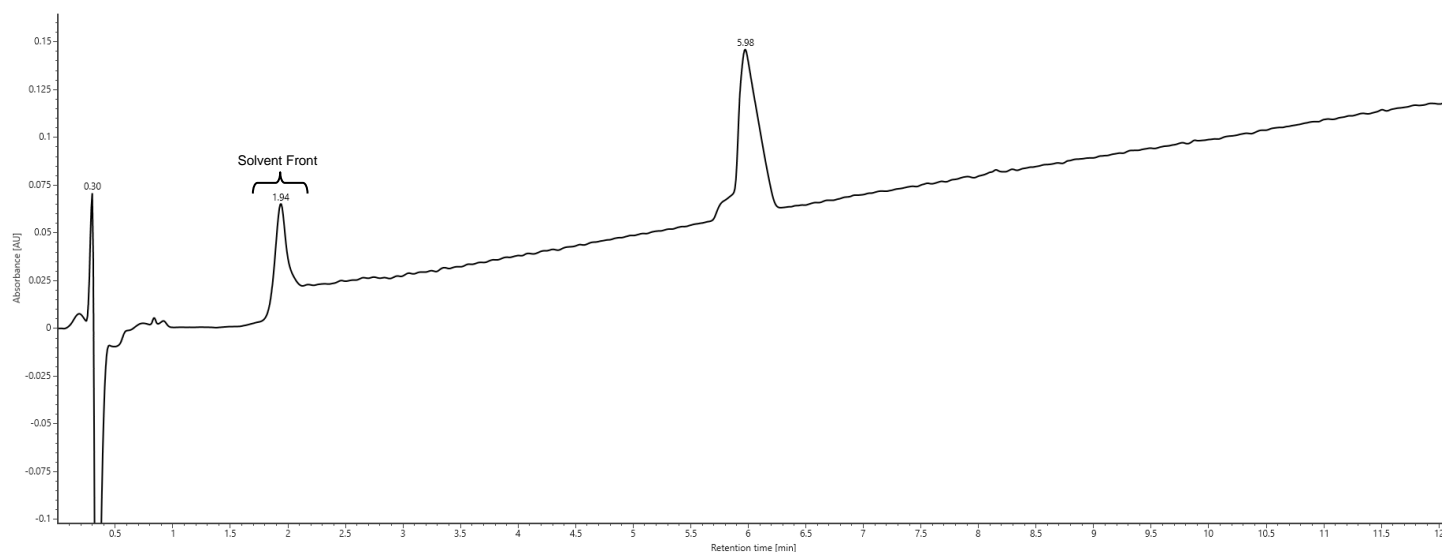

## Synthesis of **26**

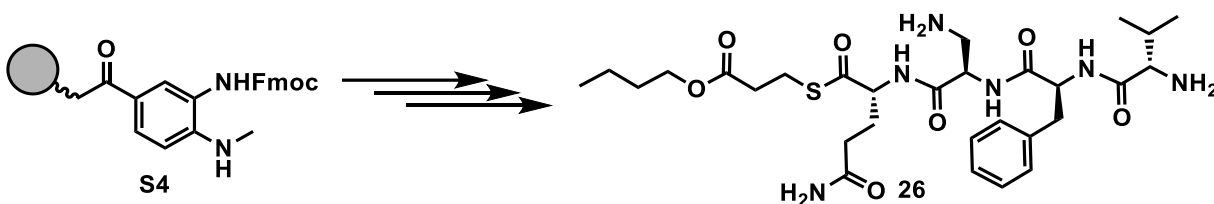

Peptide **26** was synthesized using the NDbz "safety-catch" resin. The synthesis was initiated from Fmoc-MeDbz-OH loaded resin **S4** (0.1 mmol) and involved the following amino acids: Fmoc-D-Gln(Trt)-OH, Fmoc-D-Dap(Boc)-OH, Fmoc-L-Phe-OH, and Boc-L-Val-OH. Butyl 3-mercaptopropionate was used as the cleaving thiol. The crude peptide was purified via reverse-phase semi-preparative HPLC using mobile phases of  $\text{H}_2\text{O}+0.1\%$  formic acid (A) and acetonitrile+0.1% formic acid (B). Samples were eluted using a gradient mode with mobile phase B ranging from 0% to 50% over 22 minutes at a flow rate of 20 mL/min. The column was equilibrated with 0% mobile phase B for 1 minute before and 5 minutes after the gradient to yield an off-white solid (16.3 mg, 19% yield).

$^1\text{H}$  NMR (800 MHz, DMSO)  $\delta$  8.87 (d,  $J = 6.6$  Hz, 2H), 8.40 (d,  $J = 7.1$  Hz, 1H), 8.08 (s, 6H), 7.34 – 7.25 (m, 4H), 7.22 (dd,  $J = 2056.0, 7.1$  Hz, 1H), 6.89 (s, 1H), 4.63 (p,  $J = 6.1$  Hz, 1H), 4.49 (h,  $J = 4.8$  Hz, 1H), 4.32 – 4.21 (m, 1H), 4.02 (t,  $J = 6.6$  Hz, 2H), 3.60 (s, 1H), 3.23 (dd,  $J = 5.2, 3.3$  Hz, 2H), 3.01 – 2.90 (m, 2H), 2.90 – 2.75 (m, 2H), 2.60 – 2.52 (m, 1H), 2.24 – 1.81 (m, 5H), 1.53 (p,  $J = 8.7$  Hz, 2H), 1.31 (h,  $J = 7.9$  Hz, 2H), 0.95 – 0.68 (m, 9H).

$^{13}\text{C}$  NMR (201 MHz, DMSO)  $\delta$  200.77, 174.16, 171.85, 171.60, 170.00, 169.25, 137.91, 129.55, 128.67, 126.95, 70.20, 64.39, 59.62, 57.47, 55.63, 50.52, 39.96, 36.69, 34.05, 31.40, 30.57, 30.47, 27.43, 23.67, 19.04, 18.86, 17.89, 13.99

**Mass spec:** expected neutral mass for  $C_{29}H_{46}N_6O_7S$  (Da): 622.3148, observed neutral mass (Da): 622.3152, mass error (ppm) 0.5.

**UPLC Trace** Obtained using mobile phases of  $H_2O+0.1\%$  formic acid (A) and acetonitrile+0.1% formic acid (B). Samples were eluted using a gradient mode with mobile phase B ranging from 0% to 40% over 11 minutes at a flow rate of 0.5 mL/min. The column was equilibrated with 0% mobile phase B for 1 minute before and 2 minutes after the gradient. The crude peptide purity was determined to be 96%.

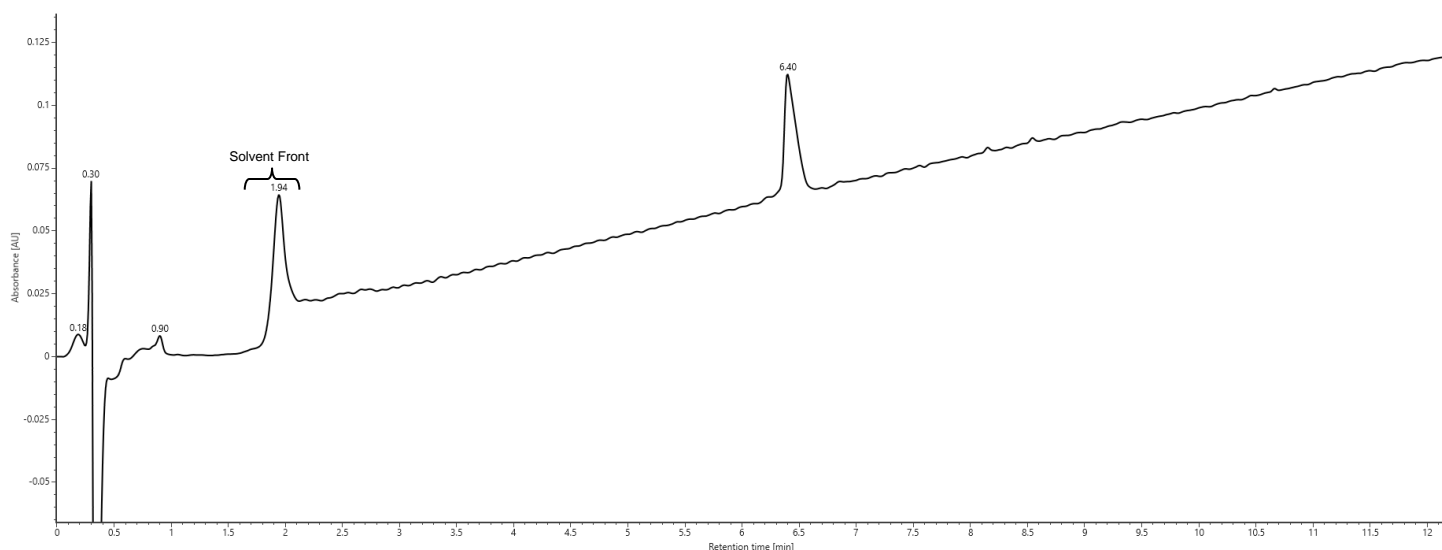

### Synthesis of **27**

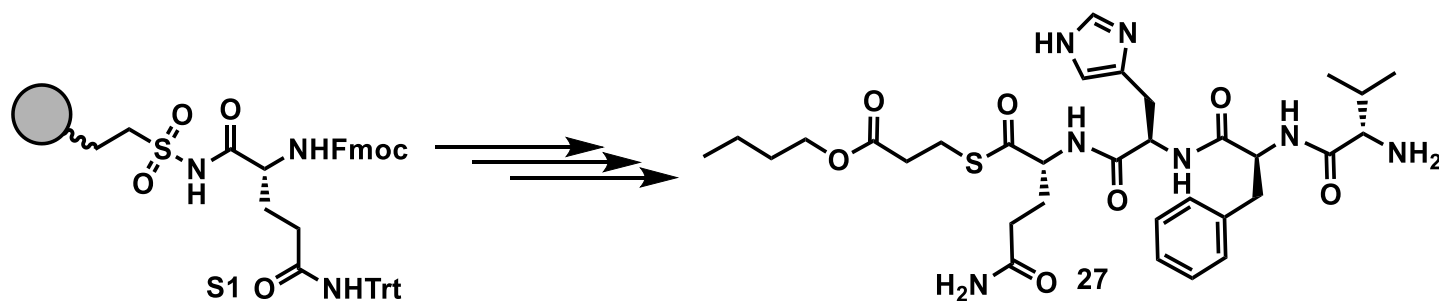

The synthesis of Peptide **27** was initiated from **S1** (0.05 mmol) using the following amino acids in the order of Fmoc-D-His(Trt)-OH, Fmoc-L-Phe-OH, and Boc-L-Val-OH, with butyl 3-mercaptopropionate used as the cleaving thiol, following the general protocol outlined above for the sulfonamide 'safety-catch' resin. The crude peptide was purified via reverse-phase semi-preparative HPLC using mobile phases of  $H_2O+0.1\%$  formic acid (A) and acetonitrile+0.1% formic acid (B). Samples were eluted using a gradient mode with mobile phase B ranging from 0% to 50% over 22 minutes at a flow rate of 20 mL/min. The column was equilibrated with 0% mobile phase B for 1 minute before and 5 minutes after the gradient to yield an off-white solid (12.1 mg, 27%).

**$^1H$  NMR** (800 MHz, DMSO)  $\delta$  8.96 (s, 1H), 8.65 (dd,  $J = 42.6, 6.3$  Hz, 3H), 8.05 (s, 2H), 7.39 – 7.05 (m, 7H), 6.83 (s, 1H), 4.64 (dt,  $J = 66.4, 5.7$  Hz, 2H), 4.30 (s, 1H), 4.01 (t,  $J = 6.2$  Hz, 2H), 3.59 (s, 1H), 3.13 (d,  $J = 13.7$  Hz, 1H), 2.95 (s, 2H), 2.84 (q,  $J = 7.4$  Hz, 2H), 2.73 (t,  $J = 8.1$  Hz, 1H), 2.54 (s, 4H), 2.23 – 2.00 (m, 3H), 2.00 –



1.94 (m, 1H), 1.91 – 1.73 (m, 1H), 1.49 (t,  $J = 7.4$  Hz, 2H), 1.31 (q,  $J = 6.2$  Hz, 2H), 0.90 (d,  $J = 5.7$  Hz, 3H), 0.87 (s, 6H).

$^{13}\text{C}$  NMR (201 MHz, DMSO)  $\delta$  200.84, 173.72, 171.51, 171.00, 170.69, 168.50, 137.47, 134.18, 129.51 (d,  $J = 16.1$  Hz), 128.47, 126.84, 117.26, 64.30, 59.44, 57.43, 54.69, 51.58, 40.81, 37.71, 33.95, 31.29, 30.49, 30.33, 27.40, 27.15, 23.60, 18.95, 18.76, 17.71, 13.90.

**Mass spec:** expected neutral mass for  $\text{C}_{32}\text{H}_{47}\text{N}_7\text{O}_7\text{S}$  (Da): 673.3257, observed neutral mass (Da): 673.3257, mass error (ppm) < 0.0.

**UPLC Trace** Obtained using mobile phases of  $\text{H}_2\text{O} + 0.1\%$  formic acid (A) and acetonitrile + 0.1% formic acid (B). Samples were eluted using a gradient mode with mobile phase B ranging from 0% to 40% over 11 minutes at a flow rate of 0.5 mL/min. The column was equilibrated with 0% mobile phase B for 1 minute before and 2 minutes after the gradient. The crude peptide purity was determined to be 98%.

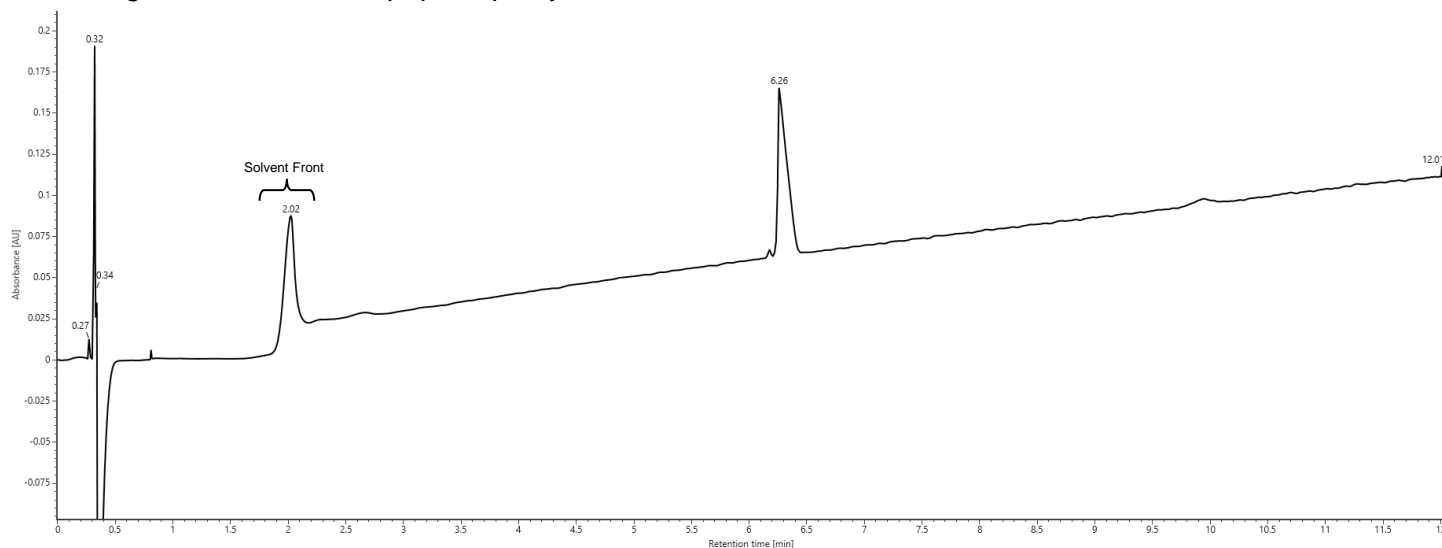

## Synthesis of **28**

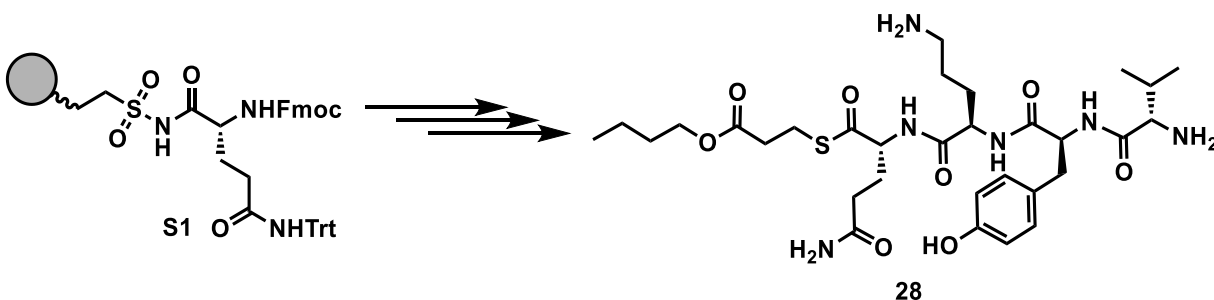

Peptide **28** was synthesized following the general protocol outlined above for the sulfonamide “safety-catch” resin. The synthesis was initiated from **S1** (0.05 mmol) using the following amino acids Fmoc-D-Orn(Boc)-OH, Fmoc-L-Tyr(tBu)-OH, Boc-L-Val-OH and butyl 3-mercaptopropionate as the cleaving thiol. The crude peptide was purified via reverse-phase semi-preparative HPLC using mobile phases of  $\text{H}_2\text{O} + 0.05\%$  TFA (A) and acetonitrile + 0.05% TFA (B). Samples were eluted using a gradient mode with mobile phase B ranging from 0% to 50% over 22 minutes at a flow rate of 20 ml/min. The column was equilibrated with 0% mobile phase B for 1 minute before and 5 minutes after the gradient to yield an off-white solid (13.0 mg, 29% yield).

$^1\text{H}$  NMR (800 MHz, DMSO)  $\delta$  9.32 (s, 1H), 8.60 (d,  $J = 6.5$  Hz, 1H), 8.52 (d,  $J = 4.7$  Hz, 1H), 8.39 (d,  $J = 7.3$  Hz, 1H), 8.04 (s, 3H), 7.83 (s, 3H), 7.26 (s, 1H), 7.08 (d,  $J = 7.1$  Hz, 2H), 6.82 (s, 1H), 6.67 (d,  $J = 4.7$  Hz, 2H), 4.58 (s, 1H), 4.31 (d,  $J = 42.2$  Hz, 2H), 4.02 (s, 2H), 3.60 (s, 1H), 2.97 (s, 2H), 2.87 (d,  $J = 12.8$  Hz, 1H), 2.54

(d,  $J = 33.4$  Hz, 7H), 2.13 (d,  $J = 46.2$  Hz, 3H), 1.94 (s, 1H), 1.80 (d,  $J = 39.9$  Hz, 2H), 1.54 (s, 2H), 1.51 – 1.37 (m, 3H), 1.32 (d,  $J = 4.7$  Hz, 2H), 1.01 – 0.60 (m, 9H).

$^{13}\text{C}$  NMR (201 MHz, DMSO)  $\delta$  201.09, 173.72, 171.95, 171.56, 171.10, 168.41, 156.37, 130.58, 127.67, 115.34, 64.29, 59.28, 57.44, 55.11, 51.74, 40.81, 38.86, 37.31, 34.01, 31.34, 30.50, 30.36, 27.49, 23.78, 23.60, 18.97, 18.79, 17.68, 13.93.

**Mass spec:** expected neutral mass for  $\text{C}_{31}\text{H}_{50}\text{N}_6\text{O}_8\text{S}$  (Da): 666.4311, observed neutral mass (Da): 666.3410, mass error (ppm) 0.1.

**UPLC Trace** Obtained using mobile phases of  $\text{H}_2\text{O}+0.1\%$  formic acid (A) and acetonitrile+0.1% formic acid (B). Samples were eluted using a gradient mode with mobile phase B ranging from 0% to 40% over 11 minutes at a flow rate of 0.5 ml/min. The column was equilibrated with 0% mobile phase B for 1 minute before and 2 minutes after the gradient. The crude peptide purity was determined to be 97%.

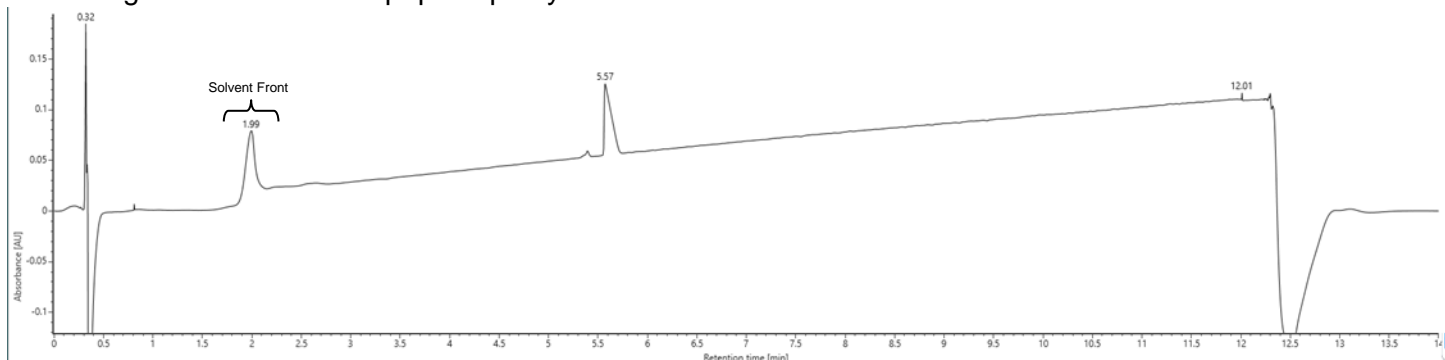

## Synthesis of **29**

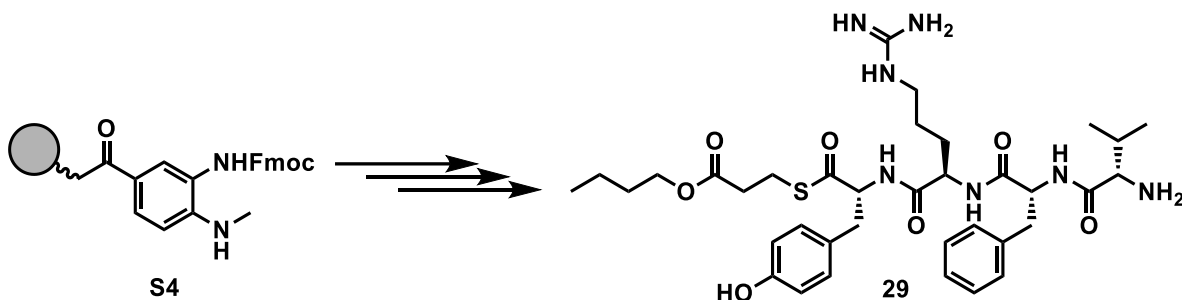

Peptide **29** was synthesized using the NDbz "safety-catch" resin. The synthesis was initiated from Fmoc-MeDbz-OH loaded resin **S4** (0.15 mmol) and involved the following amino acids: Fmoc-D-Tyr(tBu)-OH, Fmoc-D-Arg(Pbf)-OH, Fmoc-D-Phe-OH, Boc-L-Val-OH. Butyl 3-mercaptopropionate was used as the cleaving thiol. The crude peptide was purified via reverse-phase semi-preparative HPLC using mobile phases of acetonitrile+0.05% trifluoroacetic Acid (B) and  $\text{H}_2\text{O}+0.05\%$  trifluoroacetic Acid (A). Samples were eluted using a gradient mode with mobile phase B ranging from 0% to 50% over 22 minutes at a flow rate of 20 mL/min. The column was equilibrated with 0% mobile phase B for 5 minutes after and 1 minute before the gradient to yield an off-white solid (42.4 mg, 30% yield).

$^1\text{H}$  NMR (800 MHz, DMSO)  $\delta$  8.65 (q,  $J = 7.7$  Hz, 2H), 8.49 (d,  $J = 7.7$  Hz, 1H), 7.94 (d,  $J = 3.6$  Hz, 3H), 7.90 (t,  $J = 5.4$  Hz, 1H), 7.48 (s, 1H), 7.26 (d,  $J = 8.0$  Hz, 2H), 7.23 (t,  $J = 8.0$  Hz, 2H), 7.15 (t,  $J = 8.0$  Hz, 2H), 7.01 (d,  $J = 8.1$  Hz, 2H), 6.65 (d,  $J = 8.4$  Hz, 2H), 4.78 (td,  $J = 5.7, 3.9$  Hz, 1H), 4.52 – 4.47 (m, 1H), 4.36 (q,  $J = 8.1$  Hz, 1H), 4.02 (t,  $J = 6.5$  Hz, 2H), 3.59 (t,  $J = 5.4$  Hz, 1H), 3.17 – 3.08 (m, 2H), 3.06 (dd,  $J = 3.1, 2.7$  Hz, 1H), 3.02 – 2.93 (m, 3H), 2.81 (q,  $J = 9.5$  Hz, 1H), 2.66 (t,  $J = 11.9$  Hz, 1H), 2.54 (td,  $J = 3.1, 2.7$  Hz, 4H), 1.81 (h,  $J = 5.7$  Hz, 1H), 1.78 – 1.70 (m, 1H), 1.60 – 1.44 (m, 5H), 1.31 (h,  $J = 6.9$  Hz, 2H), 0.88 (t,  $J = 6.9$  Hz, 3H), 0.65 (d,  $J = 6.9$  Hz, 3H), 0.39 (d,  $J = 6.9$  Hz, 3H).

$^{13}\text{C}$  NMR (201 MHz, DMSO)  $\delta$  200.53, 171.95, 171.53, 171.26, 167.90, 157.31, 156.46, 137.88, 130.36, 129.55, 128.37, 127.14, 126.69, 115.44, 64.30, 61.25, 57.54, 54.04, 52.58, 40.81, 38.62, 36.44, 33.99, 30.50, 30.01, 29.47, 25.58, 23.74, 18.96, 18.55, 16.72, 13.92.

**Mass spec:** expected neutral mass for  $\text{C}_{36}\text{H}_{53}\text{N}_7\text{O}_7\text{S}$  (Da): 727.3727, observed neutral mass (Da): 727.3740, mass error (ppm) 1.8.

**UPLC Trace** Obtained using mobile phases of H<sub>2</sub>O+0.1% formic acid (A) and acetonitrile+0.1% formic acid (B). Samples were eluted using a gradient mode with mobile phase B ranging from 0% to 40% over 11 minutes at a flow rate of 0.5 mL/min. The column was equilibrated with 0% mobile phase B for 1 minute before and 2 minutes after the gradient. The peptides purity was determined to be 98%.

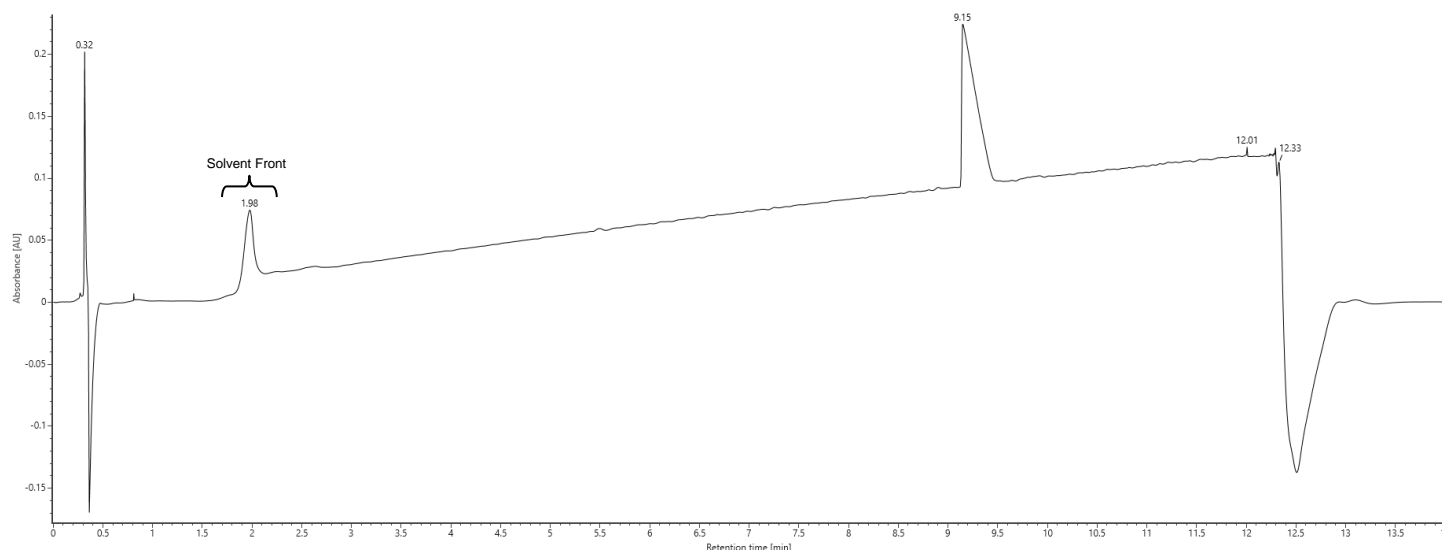

### Synthesis of **30**

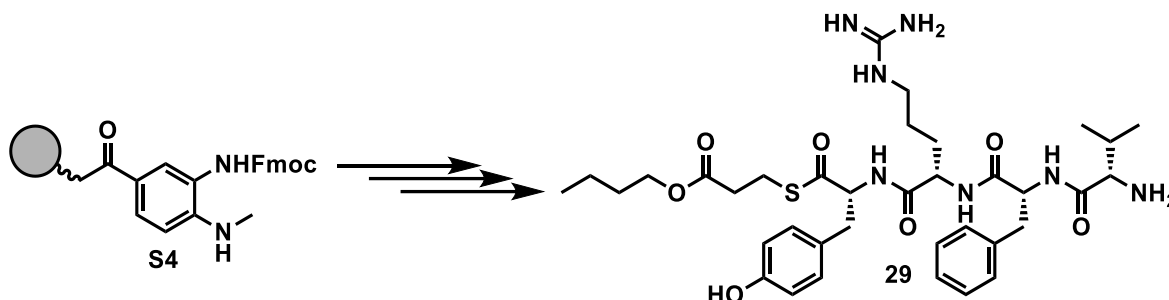

Peptide **30** was synthesized using the NDbz "safety-catch" resin. The synthesis was initiated from Fmoc-MeDbz-OH loaded resin **S4** (0.15 mmol) and involved the following amino acids: Fmoc-D-Tyr(tBu)-OH, Fmoc-L-Arg(Pbf)-OH, Fmoc-D-Phe-OH, Boc-L-Val-OH. Butyl 3-mercaptopropionate was used as the cleaving thiol. The crude peptide was purified via reverse-phase semi-preparative HPLC using mobile phases of acetonitrile+0.05% TFA (B) and H<sub>2</sub>O+0.05% TFA (A). Samples were eluted using a gradient mode with mobile phase B ranging from 0% to 50% over 22 minutes at a flow rate of 20 ml/min. The column was equilibrated with 0% mobile phase B for 5 minutes after and 1 minute before the gradient to yield an off-white solid (49.1 mg, 34% yield).

**<sup>1</sup>H NMR** (800 MHz, DMSO)  $\delta$  8.71 (t,  $J$  = 8.8 Hz, 2H), 8.45 (d,  $J$  = 8.4 Hz, 1H), 7.94 (d,  $J$  = 4.2 Hz, 3H), 7.73 (t,  $J$  = 6.0 Hz, 1H), 7.25 (d,  $J$  = 8.1 Hz, 2H), 7.23 (dd,  $J$  = 39.7, 7.3 Hz, 2H), 7.16 (t,  $J$  = 7.7 Hz, 1H), 7.01 (d,  $J$  = 8.3 Hz, 2H), 6.66 (d,  $J$  = 8.4 Hz, 2H), 4.93 – 4.86 (m, 1H), 4.54 – 4.49 (m, 1H), 4.40 (h,  $J$  = 4.5 Hz, 1H), 4.03 (t,  $J$  = 6.3 Hz, 2H), 3.59 (t,  $J$  = 5.2 Hz, 1H), 3.04 – 2.91 (m, 6H), 2.70 (t,  $J$  = 10.5 Hz, 2H), 2.61 – 2.52 (m, 2H), 1.81 (h,  $J$  = 2.4 Hz, 1H), 1.55 (p,  $J$  = 6.9 Hz, 2H), 1.43 – 1.37 (m, 1H), 1.32 (h,  $J$  = 7.7 Hz, 2H), 1.29 – 1.23 (m, 1H), 1.18 (p,  $J$  = 6.6 Hz, 2H), 0.88 (t,  $J$  = 6.9 Hz, 3H), 0.67 (d,  $J$  = 7.7 Hz, 3H), 0.42 (d,  $J$  = 7.0 Hz, 3H).

**<sup>13</sup>C NMR** (201 MHz, DMSO)  $\delta$  200.35, 171.85, 171.59, 170.92, 167.92, 157.25, 156.52, 137.64, 130.54, 129.63, 128.36, 127.07, 126.73, 115.43, 64.35, 61.19, 57.56, 53.95, 51.88, 40.63, 39.29, 36.83, 33.94, 30.51, 30.13, 29.99, 24.96, 23.82, 18.98, 18.64, 16.82, 13.93.

**Mass spec:** expected neutral mass for C<sub>36</sub>H<sub>53</sub>N<sub>7</sub>O<sub>7</sub>S (Da): 727.3727, observed neutral mass (Da): 727.3733, mass error (ppm) 0.9.

**UPLC Trace** Obtained using mobile phases of H<sub>2</sub>O+0.1% formic acid (A) and acetonitrile+0.1% formic acid (B). Samples were eluted using a gradient mode with mobile phase B ranging from 0% to 40% over 11 minutes at a

flow rate of 0.5 ml/min. The column was equilibrated with 0% mobile phase B for 1 minute before and 2 minutes after the gradient. The peptide purity was determined to be 99%.

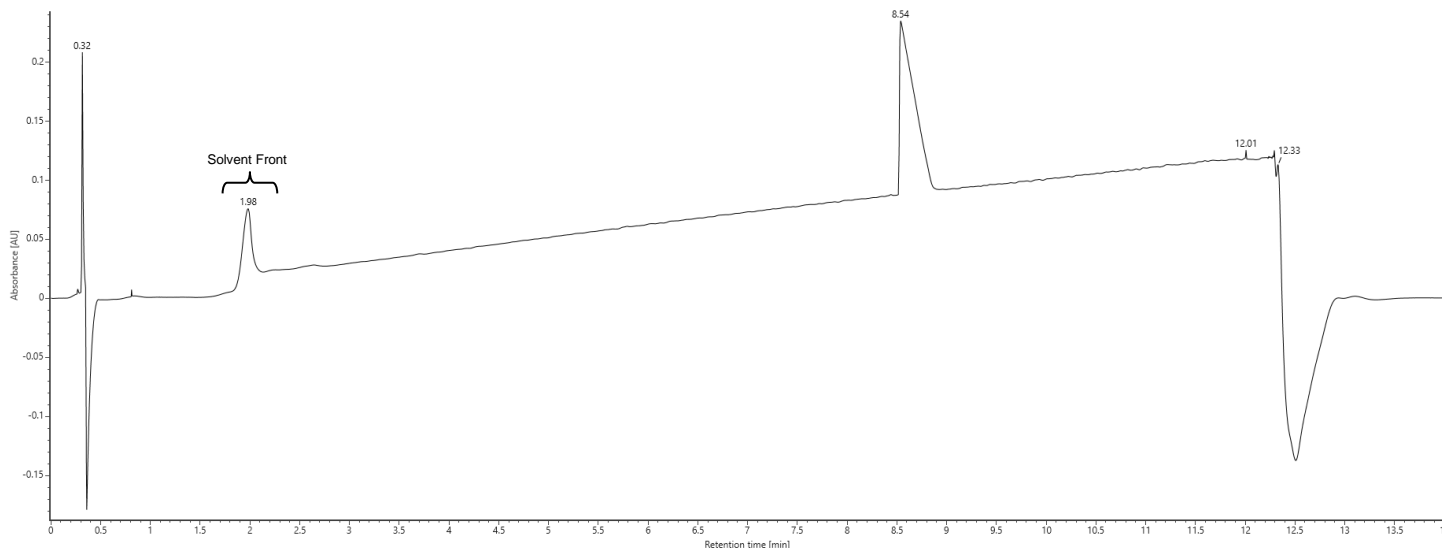

### Synthesis of **31**

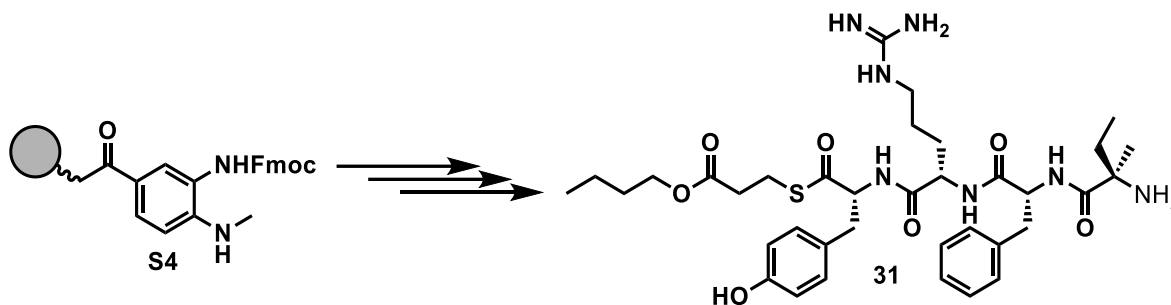

Peptide **31** was synthesized using the NDbz "safety-catch" resin. The synthesis was initiated from Fmoc-MeDbz-OH loaded resin **S4** (0.15 mmol) and involved the following amino acids: Fmoc-D-Tyr(tBu)-OH, Fmoc-D-Arg(Pbf)-OH, Fmoc-L-Phe-OH, Boc-D-isoVal-OH. Butyl 3-mercaptopropionate was used as the cleaving thiol. The crude peptide was purified via reverse-phase semi-preparative HPLC using mobile phases of acetonitrile+0.05% TFA (B) and H<sub>2</sub>O+0.05% TFA (A). Samples were eluted using a gradient mode with mobile phase B ranging from 0% to 50% over 22 minutes at a flow rate of 20 ml/min. The column was equilibrated with 0% mobile phase B for 5 minutes after and 1 minute before the gradient to yield an off-white solid (65.7 mg, 46% yield).

**<sup>1</sup>H NMR** (800 MHz, DMSO)  $\delta$  9.35 (s, 1H), 8.76 (d,  $J = 7.2$  Hz, 1H), 8.39 (dd,  $J = 9.7, 9.1$  Hz, 2H), 7.98 – 7.88 (m, 4H), 7.47 (s, 1H), 7.32 (d,  $J = 7.2$  Hz, 2H), 7.23 (t,  $J = 7.2$  Hz, 3H), 7.16 (t,  $J = 7.9$  Hz, 1H), 7.02 (d,  $J = 7.9$  Hz, 2H), 6.65 (d,  $J = 9.1$  Hz, 2H), 4.80 (td,  $J = 3.9, 3.9$  Hz, 1H), 4.49 – 4.42 (m, 2H), 4.03 (t,  $J = 6.5$  Hz, 2H), 3.13 – 3.03 (m, 3H), 2.98 (t,  $J = 7.2$  Hz, 2H), 2.92 (dd,  $J = 5.9, 5.2$  Hz, 1H), 2.80 (h,  $J = 7.2$  Hz, 2H), 2.53 (t,  $J = 6.5$  Hz, 2H), 1.79 – 1.73 (m, 1H), 1.67 (h,  $J = 7.9$  Hz, 1H), 1.52 (h,  $J = 6.5$  Hz, 4H), 1.50 – 1.40 (m, 5H), 1.32 (h,  $J = 7.9$  Hz, 2H), 0.88 (t,  $J = 7.9$  Hz, 3H), 0.24 (t,  $J = 6.5$  Hz, 3H).

**<sup>13</sup>C NMR** (201 MHz, DMSO)  $\delta$  200.62, 171.94, 171.53, 171.19, 170.68, 157.33, 156.52, 138.22, 130.39, 129.59, 128.37, 127.08, 126.65, 115.51, 64.31, 61.46, 60.47, 54.73, 51.86, 40.78, 37.96, 36.57, 34.01, 30.51, 30.30, 29.93, 25.28, 23.70, 22.63, 18.97, 13.92, 7.45.

**Mass spec:** expected neutral mass for C<sub>36</sub>H<sub>53</sub>N<sub>7</sub>O<sub>7</sub>S (Da): 727.3727, observed neutral mass (Da): 727.3774, mass error (ppm) 6.4.

**UPLC Trace** Obtained using mobile phases of H<sub>2</sub>O+0.1% formic acid (A) and acetonitrile+0.1% formic acid (B). Samples were eluted using a gradient mode with mobile phase B ranging from 0% to 40% over 11 minutes at a flow rate of 0.5 ml/min. The column was equilibrated with 0% mobile phase B for 1 minute before and 2 minutes after the gradient. The peptide purity was determined to be 97%.

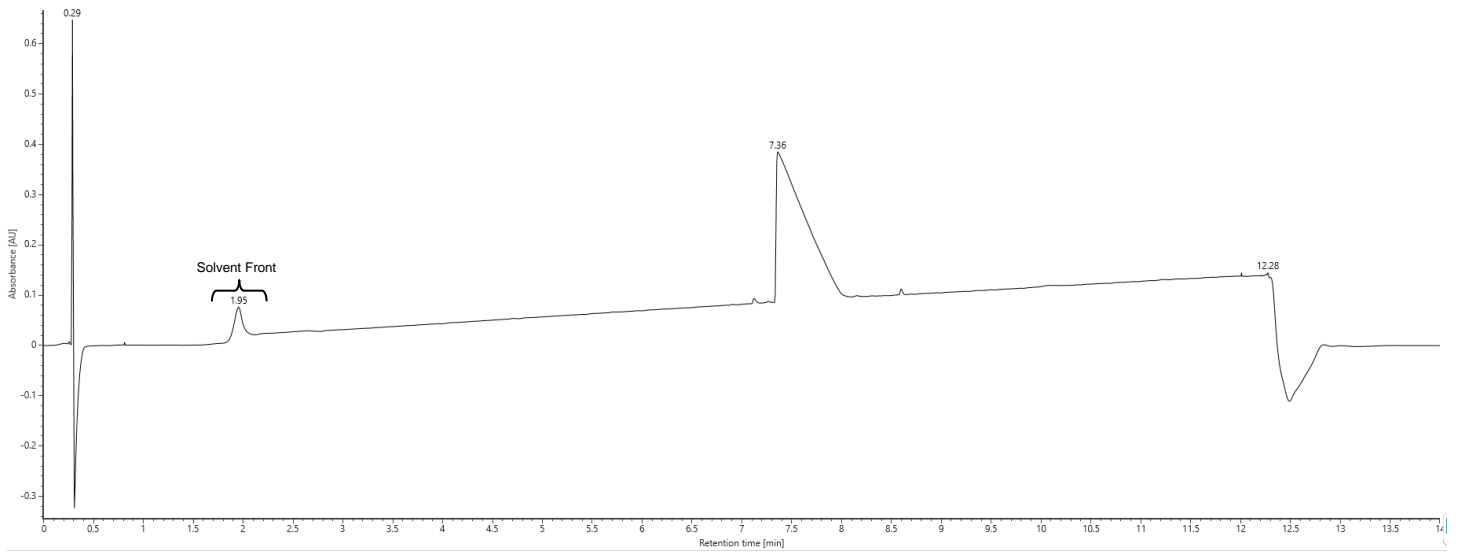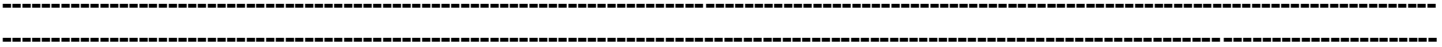

**Supplementary Table 1: Ulm16 total turnover assays.** Enzymatic reactions were conducted in 20 mM Tris at pH 8.0 with 5% DMSO for 4 hours at 30°C using various concentrations of peptides and Ulm16 as indicated by [Peptide] and [Ulm16], respectively. The areas of the enzymatic products and starting material were determined by analyzing the UPLC UV Trace at 214 nm. Total turnover numbers were calculated using a formula outlined in the methods section. Red numbers indicate substrates that were neither cyclized nor hydrolyzed.

| Substrate | [Ulm16] | [Peptide] | Area Cyclic Peptide | Area Peptide Thioester | Area Hydrolyzed Peptide | Area Hydrolyzed Dimer | Area Cyclic Dimer | Sum     | TTN   | Cyc/SM | Cyc/H |
|-----------|---------|-----------|---------------------|------------------------|-------------------------|-----------------------|-------------------|---------|-------|--------|-------|
| 2         | 14 nM   | 320 µM    | 2684660             | 37204                  | *                       |                       |                   | 2721764 | 22545 | 72     | >20:1 |
| 6         | 17 nM   | 320 µM    | 855364              | 891865                 | 30967                   |                       |                   | 1778196 | 9055  | 1.0    | 27.6  |
| 11        | 70 nM   | 280 µM    | 903688              | 927094                 | *                       |                       |                   | 1830782 | 1974  | 1.0    | >20:1 |
| 12-SNAC   | 70 nM   | 280 µM    | 1614745             | 512012                 | *                       |                       |                   | 2126758 | 3037  | 3.2    | >20:1 |
| 12-SMMP   | 70 nM   | 320 µM    | 2242929             | 61585                  | *                       |                       |                   | 2304514 | 4449  | 36     | >20:1 |
| 13        | 17 nM   | 320 µM    | 2133202             | 97416                  | 78504                   |                       |                   | 2309122 | 17389 | 21.9   | 27.2  |
| 14        | 70 nM   | 280 µM    | 584777              | 138590                 | 9594                    |                       |                   | 732961  | 3191  | 4.2    | 61    |
| 15        | 70 nM   | 280 µM    | 620130              | 56328                  | 2801                    |                       |                   | 679259  | 3652  | 11     | 221.4 |
| 16        | 11.5 nM | 280 µM    | 1922450             | 320576                 | 45581                   | 15733                 | 9476              | 2313817 | 34679 | 6.0    | 42.2  |
| 17        | 45 nM   | 280 µM    | 426879              | 176018                 | 73213                   |                       |                   | 676110  | 3929  | 2.4    | 5.8   |
| 18        | 70 nM   | 280 µM    | 439897              | 7240                   | 5536                    |                       |                   | 452673  | 3887  | 60.8   | 79.5  |
| 19        | 70 nM   | 280 µM    |                     |                        |                         |                       |                   |         |       |        |       |
| 20        | 70 nM   | 280 µM    | 1214431             | 14538                  | 79313                   |                       |                   | 1308282 | 3713  | 83.5   | 15.3  |
| 21        | 70 nM   | 280 µM    | 54373               | 138754                 | 53697                   |                       |                   | 246824  | 881   | 0.4    | 1.0   |
| 22        | 17 nM   | 320 µM    | 697840              | 227450                 | 53826                   |                       |                   | 979116  | 13416 | 3.1    | 13.0  |
| 23        | 70 nM   | 280 µM    | 175012              | 21341                  | 29731                   |                       |                   | 226084  | 3096  | 8.2    | 5.9   |
| 24        | 70 nM   | 280 µM    | 357393              | 277874                 | 39241                   |                       |                   | 674508  | 2119  | 1.3    | 9.1   |
| 25        | 70 nM   | 280 µM    | 346723              | 32901                  | 21140                   |                       |                   | 400764  | 3461  | 10.5   | 16.4  |
| 26        | 70 nM   | 280 µM    | 243137              | 67031                  | 112373                  |                       |                   | 422541  | 2302  | 3.6    | 2.2   |
| 27        | 70 nM   | 280 µM    | 142639              | 404619                 | 86311                   |                       |                   | 633569  | 1401  | 0.4    | 1.7   |
| 28        | 45 nM   | 280 µM    | 138785              | 296882                 | N.D                     |                       |                   | 435668  | 1982  | 0.5    | -     |
| 29        | 17 nM   | 320 µM    | 1078614             | 444170                 | 86863                   | 28754                 | 0                 | 1638401 | 12392 | 2.4    | 12.4  |
| 30        | 17 nM   | 320 µM    | 178195              | 270391                 | 262105                  | 57793                 | 7509              | 775992  | 4323  | 0.7    | 0.7   |
| 31        | 17 nM   | 320 µM    |                     |                        |                         |                       |                   |         |       |        |       |

**Supplementary Table 2: Ulm16 Mutant total turnover assays.** Enzymatic reactions were conducted in 20 mM Tris at pH 8.0 with 5% DMSO for 4 hours at 30°C using various concentrations of peptides and mutated Ulm16 as indicated by [Peptide] and [Ulm16], respectively. The areas of the enzymatic products and starting material were determined by analyzing the UPLC UV Trace at 214 nm. Total turnover numbers were calculated using a formula outlined in the methods section. In some cases, Tris from the reaction buffer was conjugated to the peptide and is indicated by 'Area Tris Peptide'. For Ulm16 R431A peptides 14 and 29 did not cyclize and the hydrolyzed peptide was used for TTN and are indicated with an asterisk.

| Substrate | [Ulm16] | Mutant | [Peptide] | Area Cyclic Peptide | Area Peptide Thioester | Area Hydrolyzed Peptide | Hydrolyzed Dimer | Area Tris Peptide | Sum     | TTN   | Cyc/SM | Cyc/H |
|-----------|---------|--------|-----------|---------------------|------------------------|-------------------------|------------------|-------------------|---------|-------|--------|-------|
| 12-MMP    | 70 nM   | R431A  | 280 μM    | 76920               | 1297157                | 55670                   | 6952             | 384405            | 1821105 | 169   | 0.1    | 1.4   |
| 12-MMP    | 70 nM   | S429A  | 280 μM    | 2243756             | 463979                 | 330492                  | -                | -                 | 3038226 | 2757  | 5      | 7     |
| 12-MMP    | 70 nM   | Y428A  | 280 μM    | 337847              | 2114642                | 476929                  | -                | -                 | 2929418 | 431   | 0.2    | 0.7   |
| 12-MMP    | 500 nM  | 1-344  | 280 μM    | 34981               | 1914589                | 398195                  | 118632           | -                 | 2466397 | 8     | 0.0    | 0.1   |
| 12-MMP    | 70 nM   | L300G  | 280 μM    | 352754              | 1333933                | 73655                   | 9596             | -                 | 1769938 | 797   | 0.3    | 4.8   |
| 12-MMP    | 70 nM   | D297N  | 280 μM    | 639759              | 889575                 | 25572                   | 15839            | -                 | 1570745 | 1629  | 0.7    | 25.0  |
| 14        | 70 nM   | R431A  | 280 μM    | 0                   | 350874                 | 40992                   | -                | -                 | 391866  | 391*  | 8.6*   | -     |
| 14        | 70 nM   | S429A  | 280 μM    | 421988              | 68621                  | 15890                   | -                | -                 | 506499  | 3110  | 6      | 26.6  |
| 14        | 70 nM   | Y428A  | 280 μM    | 265996              | 285678                 | 14688                   | -                | -                 | 566362  | 1753  | 1      | 18.1  |
| 14        | 500 nM  | 1-344  | 280 μM    | -                   | -                      | -                       | -                | -                 | -       | -     | -      | -     |
| 14        | 70 nM   | L300G  | 280 μM    | 92709               | 320930                 | 14295                   | -                | -                 | 427935  | 800   | 0.3    | 6.5   |
| 14        | 70 nM   | D297N  | 280 μM    | 46591               | 325366                 | 13582                   | -                | -                 | 385539  | 451   | 0.1    | 3.4   |
| 16        | 32.5 nM | R431A  | 280 μM    | 206670              | 21343                  | 451015                  | 69447            | -                 | 748474  | 2379  | 9.7    | 0.5   |
| 16        | 32.5 nM | S429A  | 280 μM    | 1676219             | 16367                  | 21117                   | -                | -                 | 1713703 | 8427  | 102    | 79    |
| 16        | 32.5 nM | Y428A  | 280 μM    | 1077523             | 510451                 | 37788                   | 26261            | -                 | 1652023 | 5619  | 2.1    | 28.5  |
| 16        | 500 nM  | 1-344  | 280 μM    | 32923               | 1428807                | 20947                   | -                | -                 | 1482676 | 12    | 0      | 1.6   |
| 16        | 32.5 nM | L300G  | 280 μM    | 676744              | 1097879                | 17546                   | -                | -                 | 1792168 | 3253  | 0.6    | 38.6  |
| 16        | 32.5 nM | D297N  | 280 μM    | 936327              | 819680                 | 21794                   | -                | -                 | 1777802 | 4538  | 1.1    | 43    |
| 29        | 32.5 nM | R431A  | 280 μM    | -                   | 12064                  | 506230                  | 279574           | -                 | 797868  | 8485* | 23.2*  | -     |
| 29        | 32.5 nM | S429A  | 280 μM    | 1316148             | 7336                   | 95074                   | 44703            | -                 | 1463262 | 7749  | 179    | 14    |
| 29        | 32.5 nM | Y428A  | 280 μM    | 1139426             | 15322                  | 99508                   | 78596            | -                 | 1332852 | 7365  | 74     | 11.5  |
| 29        | 500 nM  | 1-344  | 280 μM    | 15295               | 546699                 | 54107                   | -                | -                 | 616101  | 14    | 0      | 0.3   |
| 29        | 32.5 nM | L300G  | 280 μM    | 831196              | 626389                 | 41292                   | -                | -                 | 1498876 | 4778  | 1.3    | 20.1  |
| 29        | 32.5 nM | D297N  | 280 μM    | 1013803             | 379441                 | 111736                  | -                | -                 | 1504979 | 5804  | 2.7    | 9.1   |
| 30        | 32.5 nM | R431A  | 280 μM    | 17557               | 43403                  | 535460                  | 98024            | 313789            | 1008232 | 150   | 0.4    | 0.02  |
| 30        | 32.5 nM | S429A  | 280 μM    | 283097              | 12587                  | 183397                  | 206969           | -                 | 686050  | 3555  | 22.5   | 1.5   |
| 30        | 32.5 nM | Y428A  | 280 μM    | 295075              | 11015                  | 280007                  | 122283           | -                 | 708380  | 3589  | 26.8   | 1.1   |
| 30        | 500 nM  | 1-344  | 280 μM    | 22817               | 1153654                | 58062                   | -                | -                 | 1234532 | 10    | 0      | 0.4   |
| 30        | 32.5 nM | L300G  | 280 μM    | 501905              | 13196                  | 246999                  | 76568            | -                 | 838668  | 5156  | 38     | 2     |
| 30        | 32.5 nM | D297N  | 280 μM    | 127879              | 11739                  | 380677                  | 78431            | 74063             | 672789  | 1638  | 11     | 0.3   |

**Supplementary Table 3: Crystallography Table**

Ulm16 12-440 8FEK

| Data Collection                            |                          |
|--------------------------------------------|--------------------------|
| Beamline                                   | SSRL BL 12-2             |
| Wavelength (Å)                             | 0.98                     |
| Resolution range (Å)                       | 32.8-2.058 (2.132-2.058) |
| Space group                                | P 1 21 1                 |
| Cell dimensions                            |                          |
| a, b, c (Å)                                | 48.822, 67.871, 56.779   |
| $\alpha$ , $\beta$ , $\gamma$ (°)          | 90.0, 102.505, 90.0      |
| Total reflections                          | 1987820                  |
| Unique reflections                         | 22120 (2171)             |
| Redundancy (%)                             | 5.9 (6.0)                |
| Completeness (%)                           | 97.74 (95.59)            |
| Rmerge                                     | 0.141 (0.710)            |
| Rmeas                                      | 0.156 (0.785)            |
| Rpim                                       | 0.065 (0.328)            |
| I/ $\sigma$ (I)                            | 15.11 (4.31)             |
| CC1/2                                      | 0.984 (0.505)            |
| Wilson B (Å <sup>2</sup> )                 | 28.42                    |
| Refinement                                 |                          |
| Copies/A.S.U.                              | 1                        |
| Resolution (Å)                             | 2.07                     |
| Rwork / Rfree                              | 0.186 / 0.219            |
| No. nonhydrogen atoms                      | 3176                     |
| Protein                                    | 2981                     |
| Water                                      | 195                      |
| B factors (Å <sup>2</sup> )                | 40.67                    |
| Protein                                    | 40.65                    |
| Water                                      | 40.92                    |
| R.m.s.d                                    |                          |
| Bond lengths (Å)                           | 0.004                    |
| Bond angles (°)                            | 0.66                     |
| Ramachandran<br>(favored/allowed/outliers) | 97.75, 2.25, 0           |
| Rotamer outliers (%)                       | 0.0                      |
| Clash score                                | 3.07                     |



**Supplementary Table 4: Primers used for site directed mutagenesis**

| Primer Name          | Oligonucleotide Sequence (5'-3')      |
|----------------------|---------------------------------------|
| BamHI-Ulm16 12 Fwd   | CATCATGGATCCGGCGCCGGTGACGGCG          |
| Ulm16 440-XhoI Rev   | ATGATGATGCTCGAGTCAGGACTCTCCCGCTTCCCGC |
| pGEX6p1 Ulm16 FL Fwd | CAGGGGCCCTGGGATCCGGCGCCGGTGACGGCG     |
| pGEX6p1 Ulm16 FL Rev | GCGCGAGGCAGATCGTCAGGACTCTCCCGCTTCCCGC |
| 5GEX Fwd             | GGGCTGGCAAGCCACGTTTGGTG               |
| 3GEX Rev             | CCGGGAGCTGCATGTGTGTCAGAGG             |
| Ulm16 D297N Fwd      | TGGCTCGGCCACAACGGCACCCCTG             |
| Ulm16 D297N Rev      | CAGGGTGCCGTTGTGGCCGAGCCA              |
| Ulm16 L300A Fwd      | CCACGACGGCACCGCCGACGGCGCCACCTG        |
| Ulm16 L300A Rev      | CAGGTGGCGCCGTCGGCGGTGCCGTCGTGG        |
| Ulm16 L300G Fwd      | CCACGACGGCACCGGGCGACGGCGCCACCTG       |
| Ulm16 L300G Rev      | CAGGTGGCGCCGTCGCCGGTGCCGTCGTGG        |
| Ulm16 R431A Fwd      | CTCCAGTACAGCGGAGCCACCCTCCTGCGGGAAG    |
| Ulm16 R431A Rev      | CTTCCCGCAGGAGGGTGGCTCCGCTGTACTGGAG    |
| Ulm16 Y428A Fwd      | CGCCCTCCAGGCCAGCGGACGCACCC            |
| Ulm16 Y428A Rev      | GGGTGCGTCCGCTGGCCTGGAGGGCG            |
| Ulm16 S429A Fwd      | CGCCCTCCAGTACGCCGGACGCACCCTCCT        |
| Ulm16 S429A Rev      | AGGAGGGTGCGTCCGGCGTACTGGAGGGCG        |

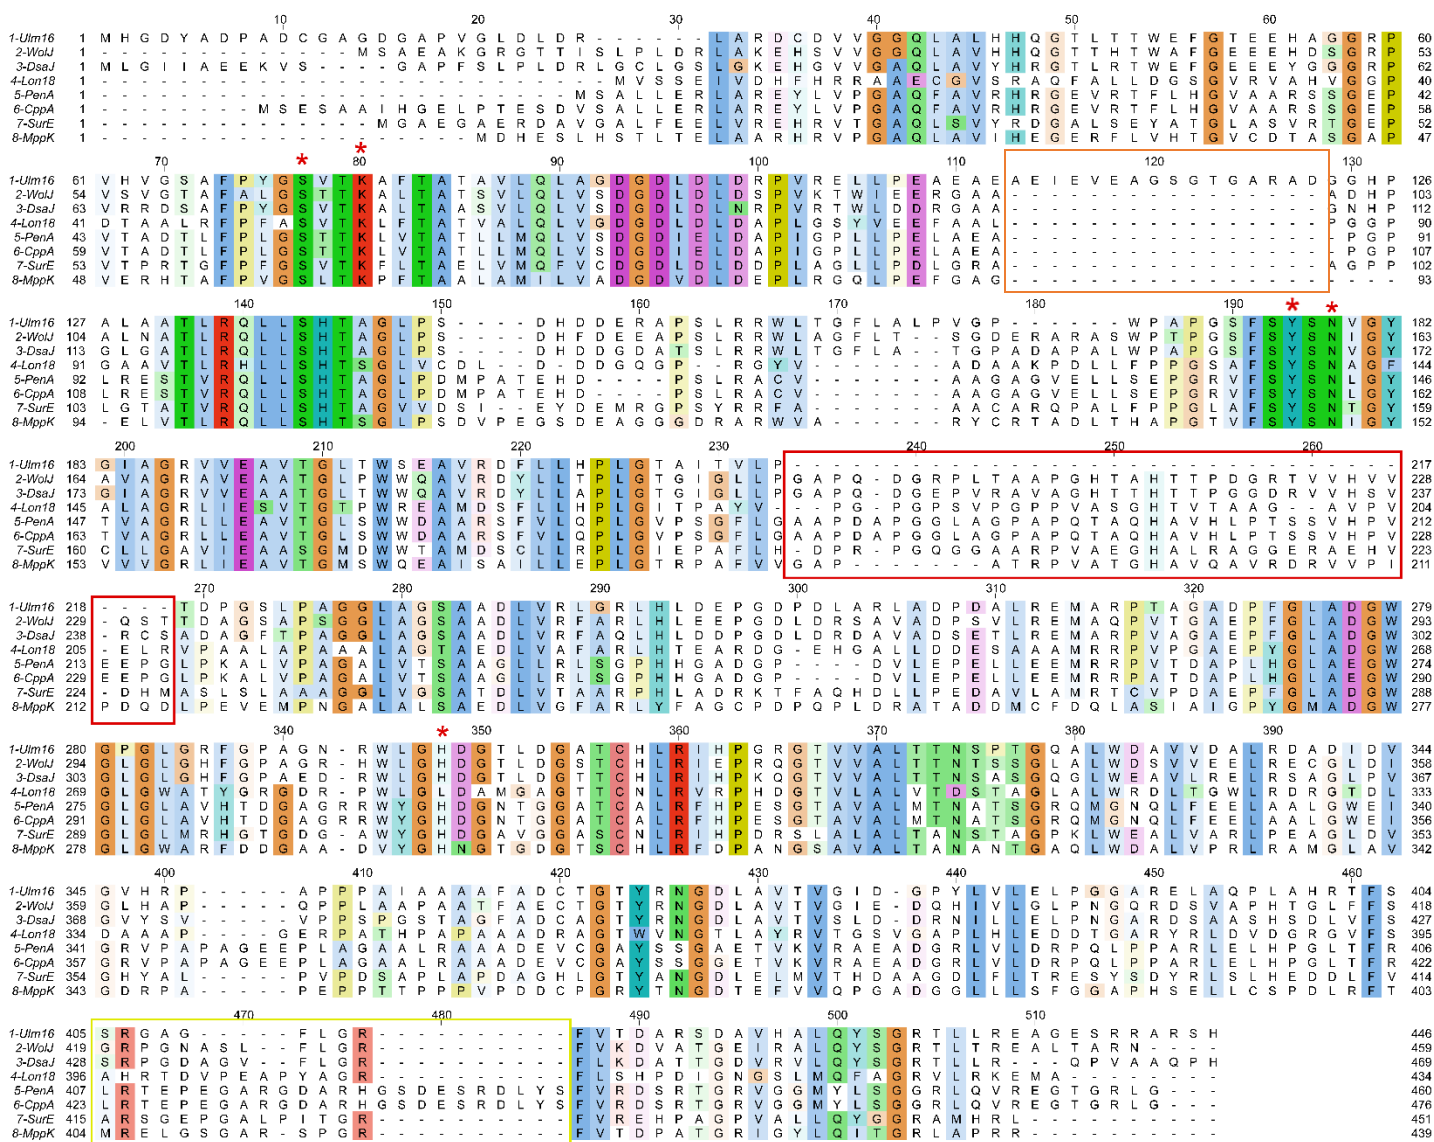

**Supplementary Fig. 1: Multiple sequence alignment of predicted and validated PBP-TEs.** Residues in the conserved catalytic tetrad are highlighted with a red star. The loop regions that were identified in the alpha fold structure are also highlighted in the multiple sequence alignment, with red being the loop region, which is truncated in Ulm16, yellow being the lipocalin domain loop, and orange being the insertion in Ulm16. Note: the numbering of the amino acids is off compared to the numbering in the paper due to the alignment. The orange loop is residues 113-128.

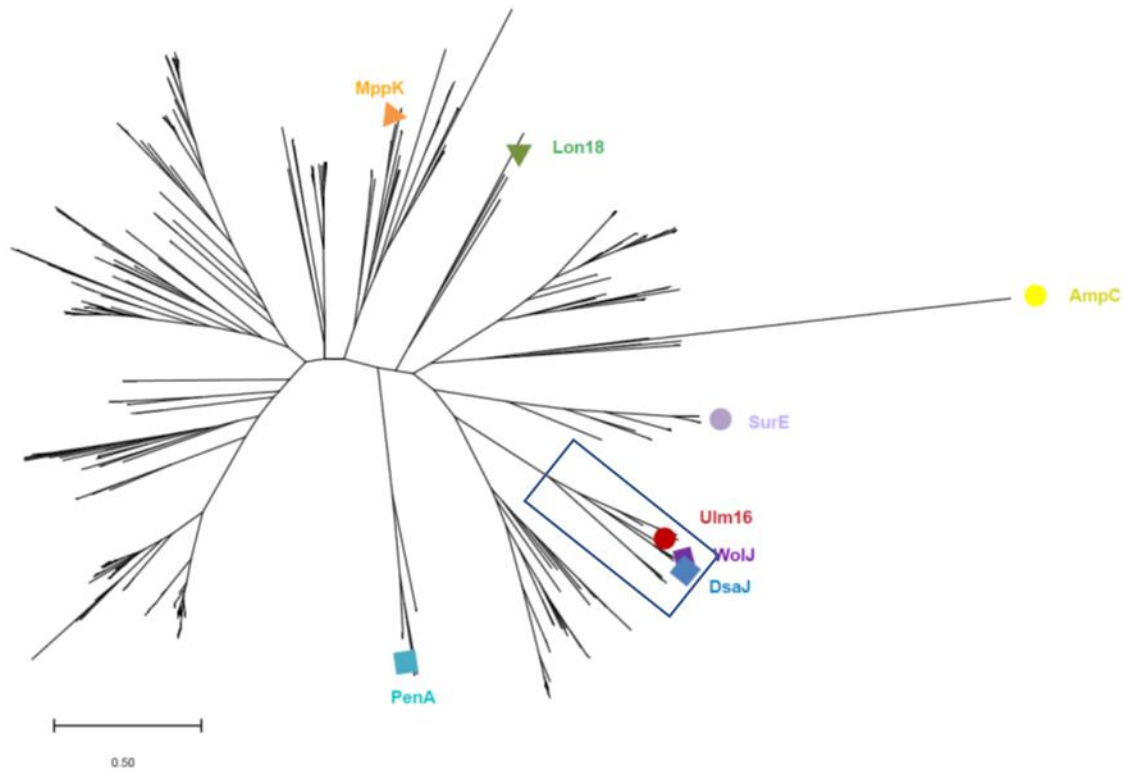

**Supplementary Fig. 2 Phylogenetic tree of PBP-TEs.** The top 500 hits to Ulm16 from NCBI along with the known PBP-TEs are shown. PBP-TEs belonging to known biosynthetic gene clusters are labeled in the figure. Including the outlier AmpC, which is a beta-lactamase from *E. coli*.

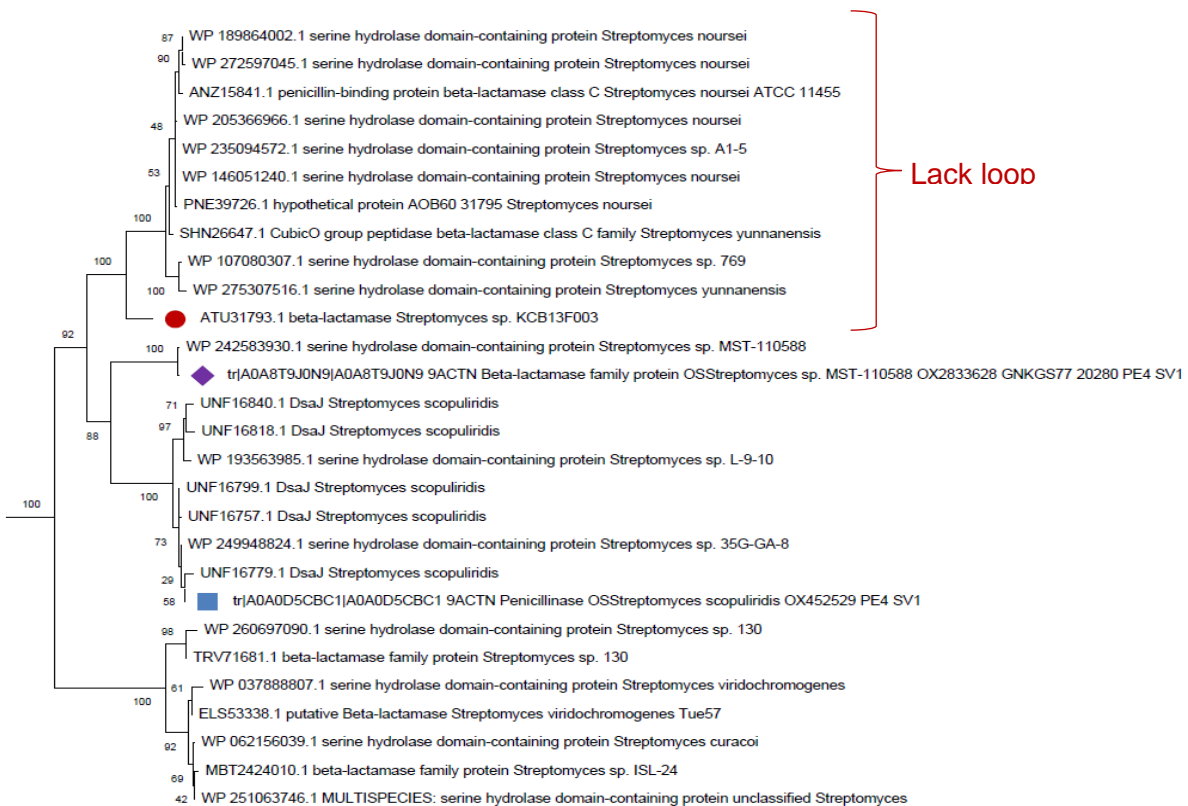

**Supplementary Fig. 3: Zoom in of Phylogenetic tree the PBP-TEs most similar to Ulm16.** Homologs to Ulm16 that lack the loop region are indicated. Numbers at nodes represent bootstrap values.

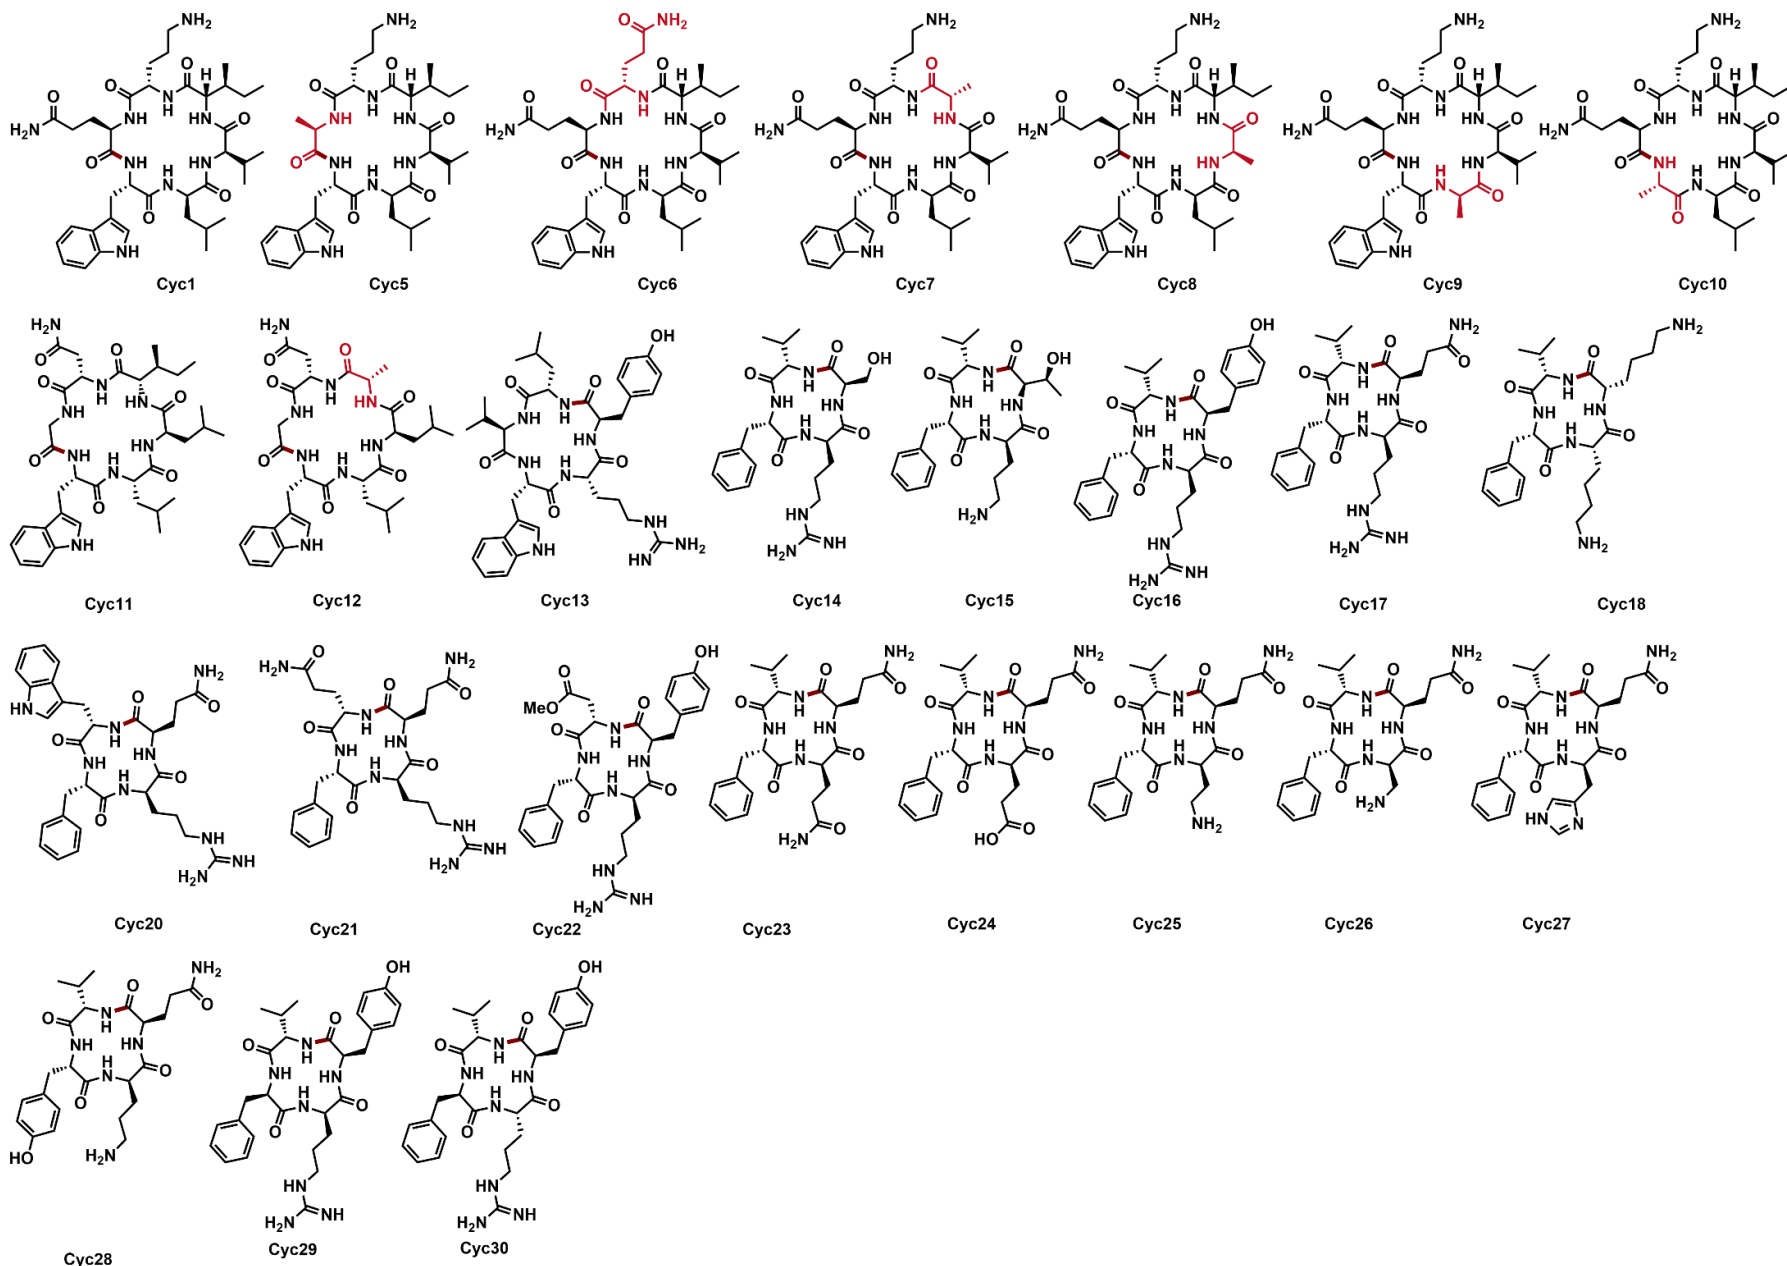

**Supplementary Fig. 4: Cyclic peptides identified by MS/MS analysis.** For cyclic peptides belonging to the Ulm16 alanine scan (Cyc 5-10) residues which differ from the original structure (Cyc1) are colored in red. For all peptides point of cyclization is colored in maroon. Actual MS/MS data can be found on pages S76-S104.

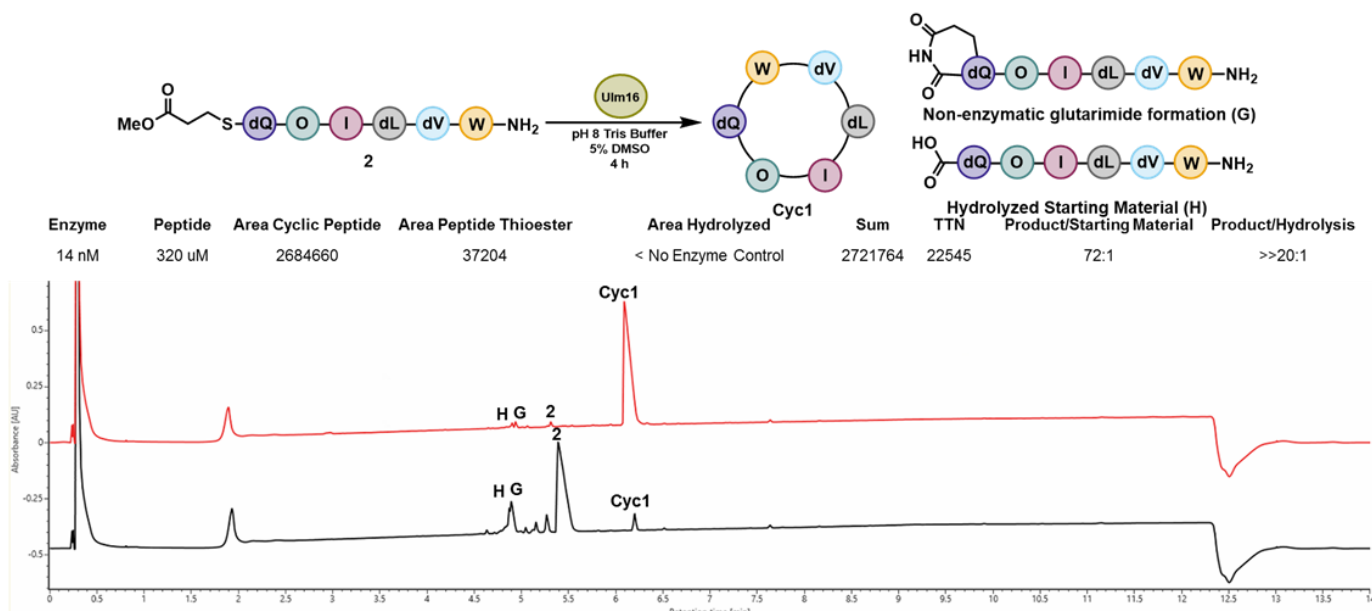

**Supplementary Fig. 5: UPLC UV trace (214 nm) for the total turnover number (TTN) assay of Ulm16 with Ulm-SMMP (2).** The enzyme and substrate concentrations are indicated in **Supplementary Table 1** and above the trace. The substrates are labeled with their corresponding numbers from the paper, while 'Cyc' and 'H' represent head-to-tail cyclic and hydrolyzed linear compounds, respectively. 'G' represents non-enzymatic glutaramide formation, which can occur due to extended incubation periods in the absence of enzyme (-Ulm16). The UPLC trace is representative of three individual replicates, while the TTN, product to hydrolysis/starting material ratios are averages of three replicates. UPLC was taken on a 0 to 70% gradient (See methods section for more details).

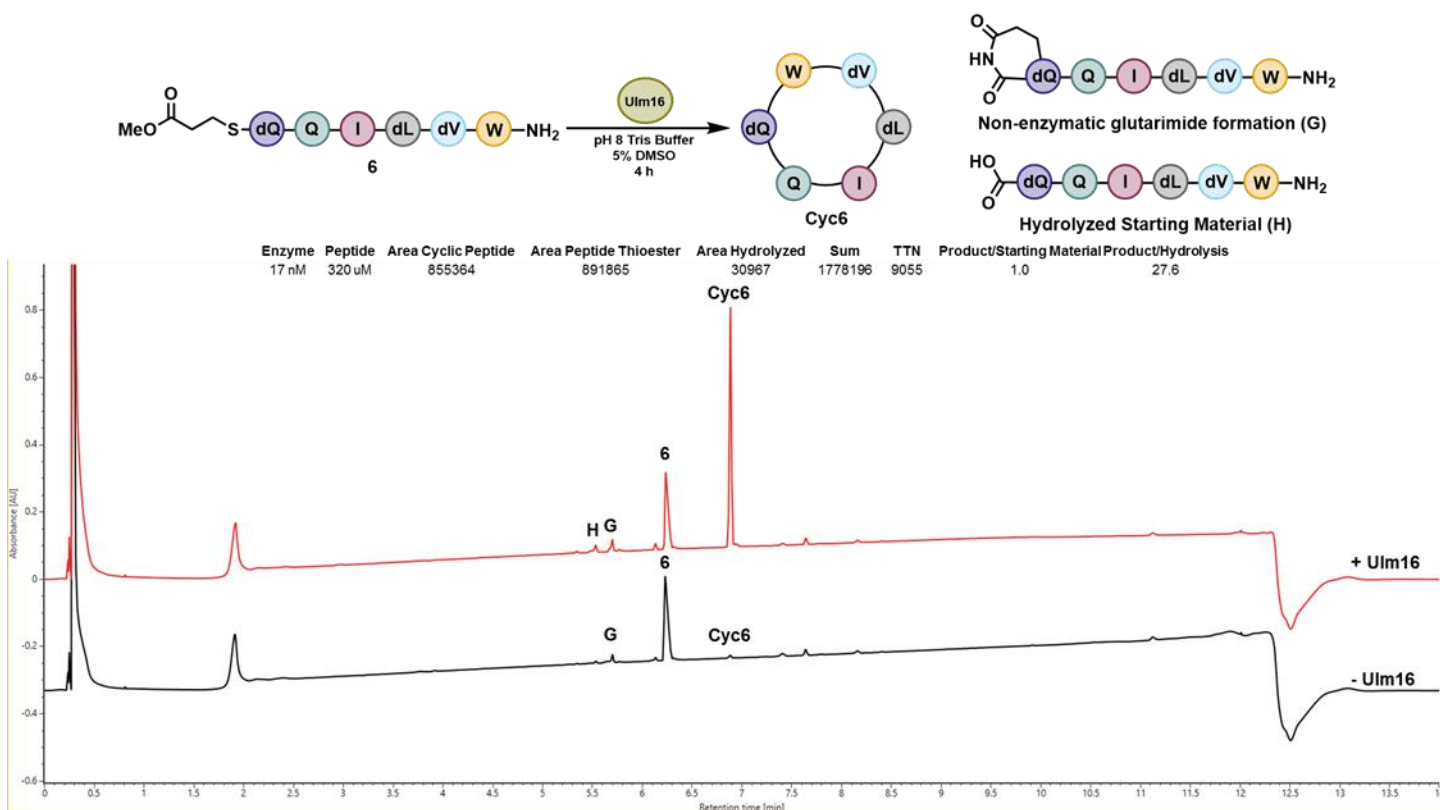

**Supplementary Fig. 6: UPLC UV trace (214 nm) for the total turnover number (TTN) assay of Ulm16 with Ulm-SMMP where L-Orn replaced by L-Gln (6).** The enzyme and substrate concentrations are indicated in **Supplementary Table 1** and above the trace. The substrates are labeled with their corresponding numbers from

the paper, while 'Cyc' and 'H' represent head-to-tail cyclic and hydrolyzed linear compounds, respectively. 'G' represents non-enzymatic glutaramide formation, which can occur due to extended incubation periods in the absence of enzyme (-Ulm16). The UPLC trace is representative of three individual replicates, while the TTN, product to hydrolysis/starting material ratios are averages of three replicates. UPLC was taken on a 0 to 70% gradient (See methods section for more details).

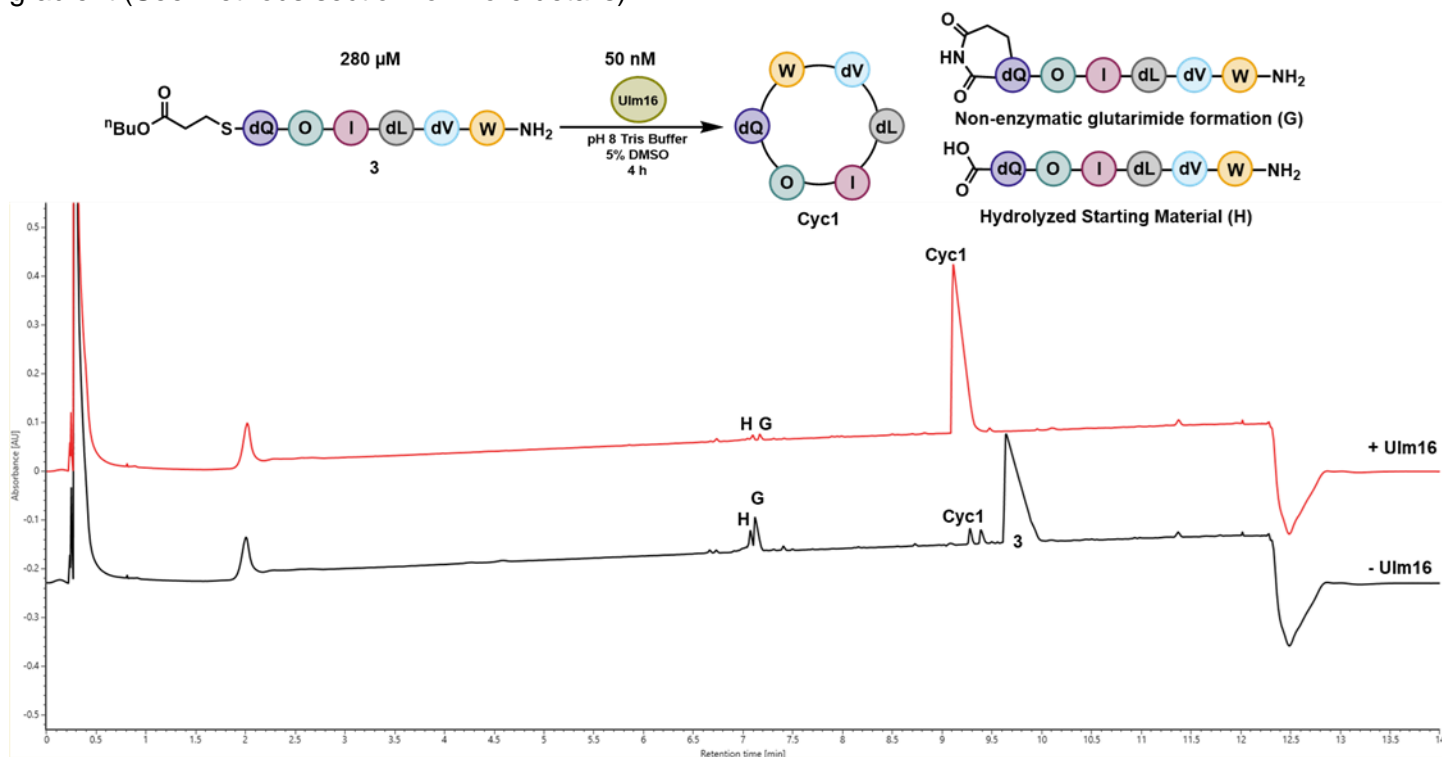

**Supplementary Fig. 7: In vitro reaction of Ulm16 with Ulm-SBMP (3).** Enzyme and substrate concentrations are indicated above each reaction in the figure. The substrates are labeled with their corresponding numbers from the paper, while 'Cyc' and 'H' represent head-to-tail cyclic and hydrolyzed linear compounds, respectively. 'G' represents non-enzymatic glutaramide formation, which can occur due to extended incubation periods in the absence of enzyme (-Ulm16). All UPLC UV traces (214 nm) are representative of three individual replicates.

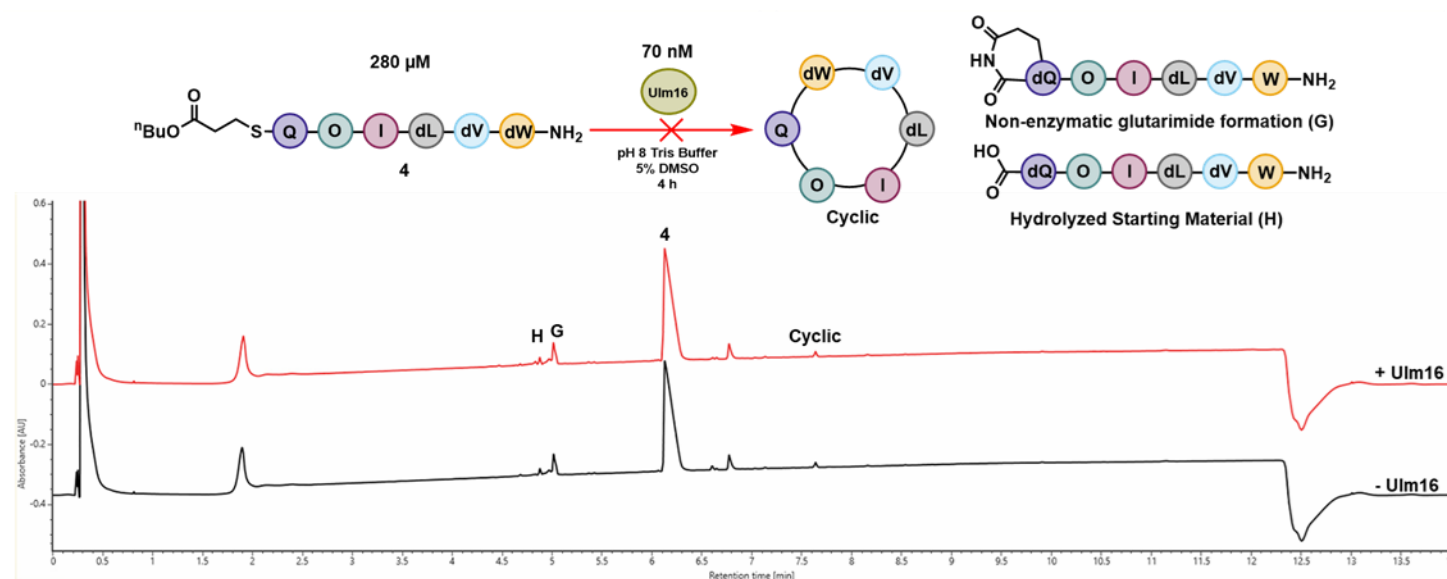

**Supplementary Fig. 8: In vitro reaction of Ulm16 with Ulm-SBMP where D-Gln was replaced by L-Gln (4).** Enzyme and substrate concentrations are indicated above each reaction in the figure. The substrates are labeled with their corresponding numbers from the paper, while 'Cyc' and 'H' represent head-to-tail cyclic and hydrolyzed linear compounds, respectively. 'G' represents non-enzymatic glutaramide formation, which can occur due to

extended incubation periods in the absence of enzyme (-Ulm16). All UPLC UV traces (214 nm) are representative of three individual replicates.

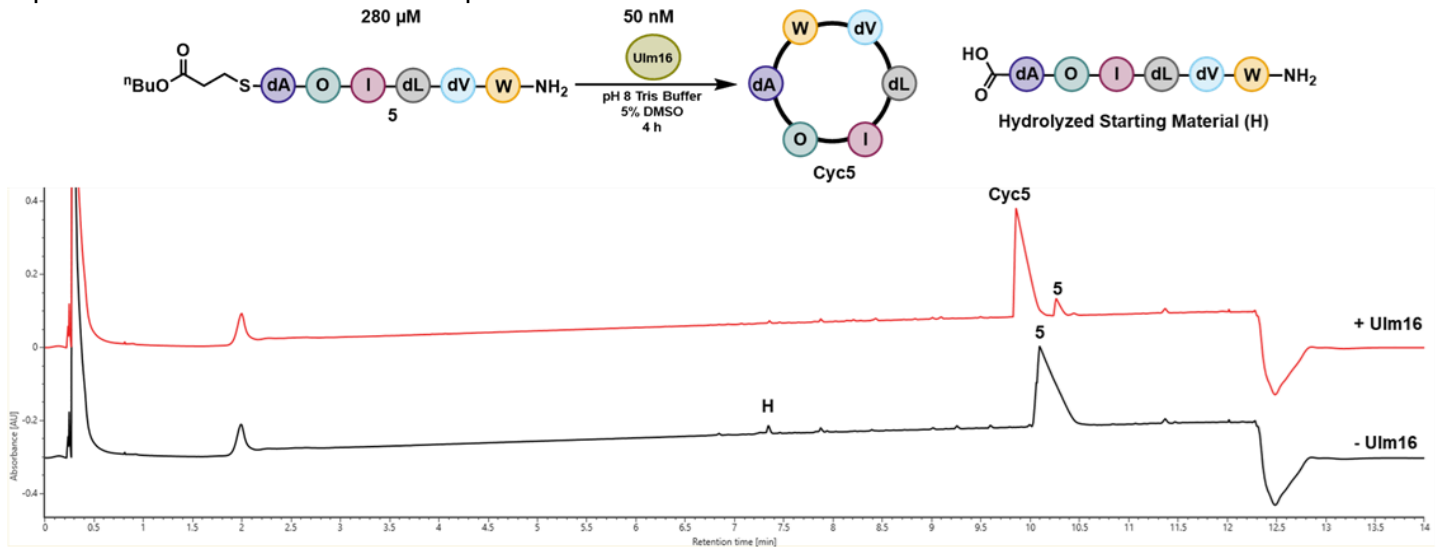

**Supplementary Fig. 9:** *In vitro* reaction of Ulm16 with Ulm-SBMP where D-Gln was replaced by D-Ala (5). Enzyme and substrate concentrations are indicated above each reaction in the figure. The substrates are labeled with their corresponding numbers from the paper, while 'Cyc' and 'H' represent head-to-tail cyclic and hydrolyzed linear compounds, respectively. 'G' represents non-enzymatic glutaramide formation, which can occur due to extended incubation periods in the absence of enzyme (-Ulm16). All UPLC UV traces (214 nm) are representative of three individual replicates.

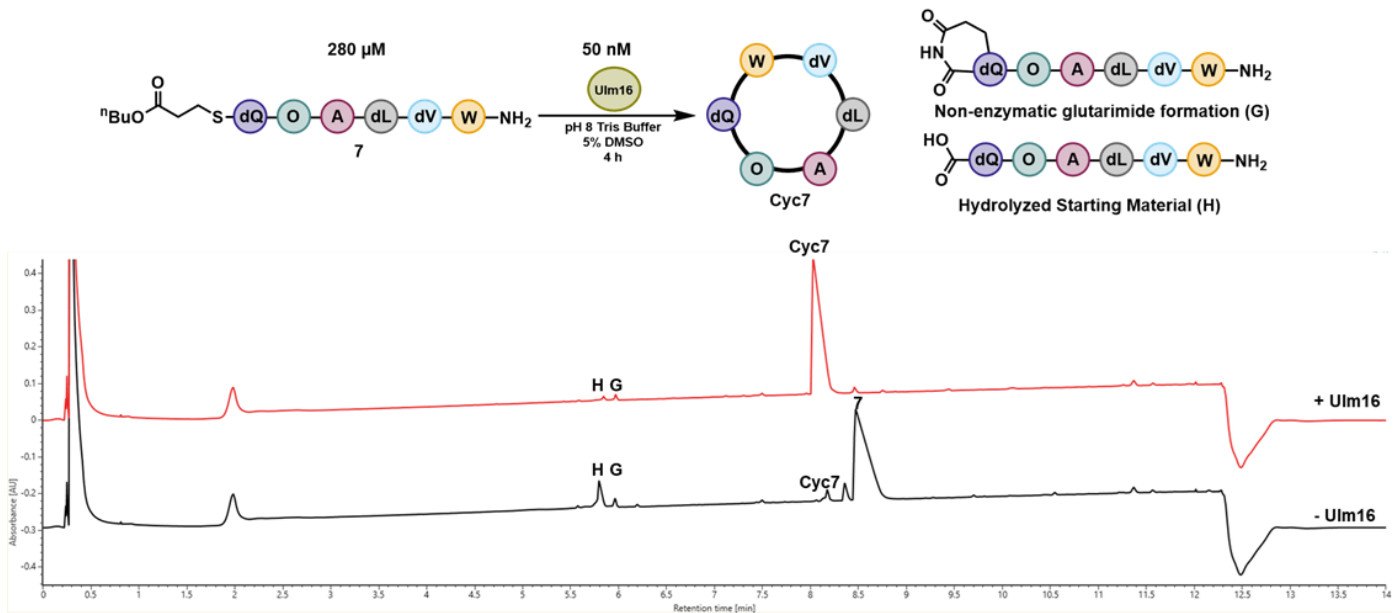

**Supplementary Fig. 10:** *In vitro* reaction of Ulm16 with Ulm-SBMP where L-Ile was replaced by L-Ala (7). Enzyme and substrate concentrations are indicated above each reaction in the figure. The substrates are labeled with their corresponding numbers from the paper, while 'Cyc' and 'H' represent head-to-tail cyclic and hydrolyzed linear compounds, respectively. 'G' represents non-enzymatic glutaramide formation, which can occur due to extended incubation periods in the absence of enzyme (-Ulm16). All UPLC UV traces (214 nm) are representative of three individual replicates.

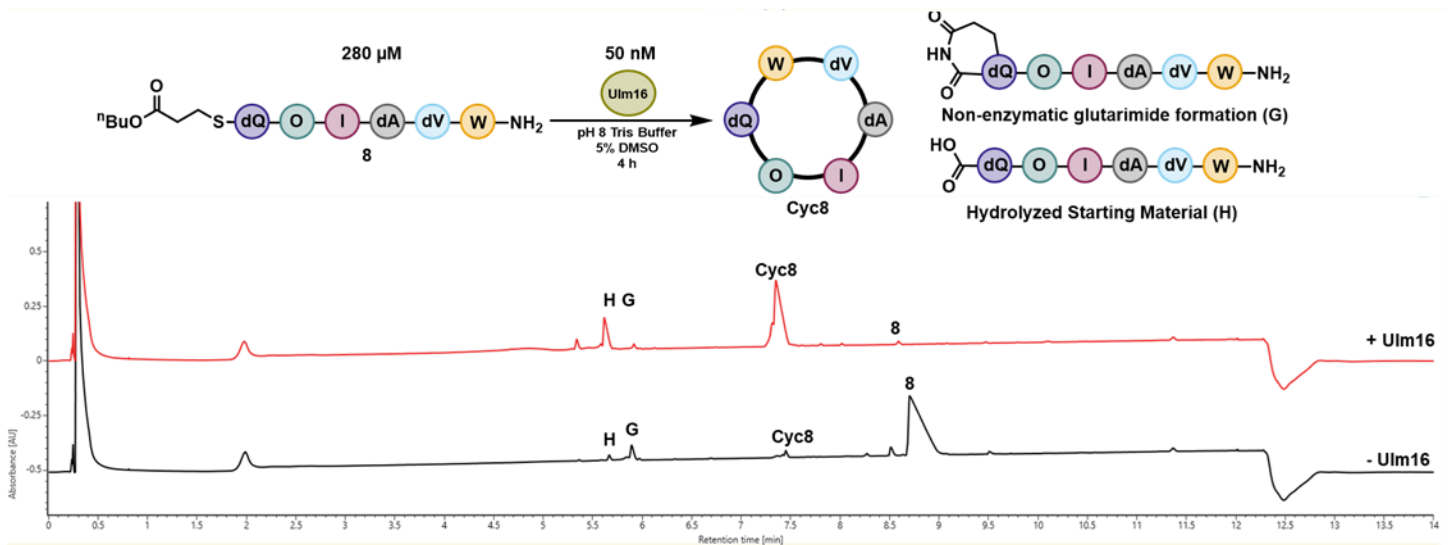

**Supplementary Fig. 11: *In vitro* reaction of Ulm16 with Ulm-SBMP where D-Leu was replaced by D-Ala (8).** Enzyme and substrate concentrations are indicated above each reaction in the figure. The substrates are labeled with their corresponding numbers from the paper, while 'Cyc' and 'H' represent head-to-tail cyclic and hydrolyzed linear compounds, respectively. 'G' represents non-enzymatic glutarimide formation, which can occur due to extended incubation periods in the absence of enzyme (-Ulm16). All UPLC UV traces (214 nm) are representative of three individual replicates.

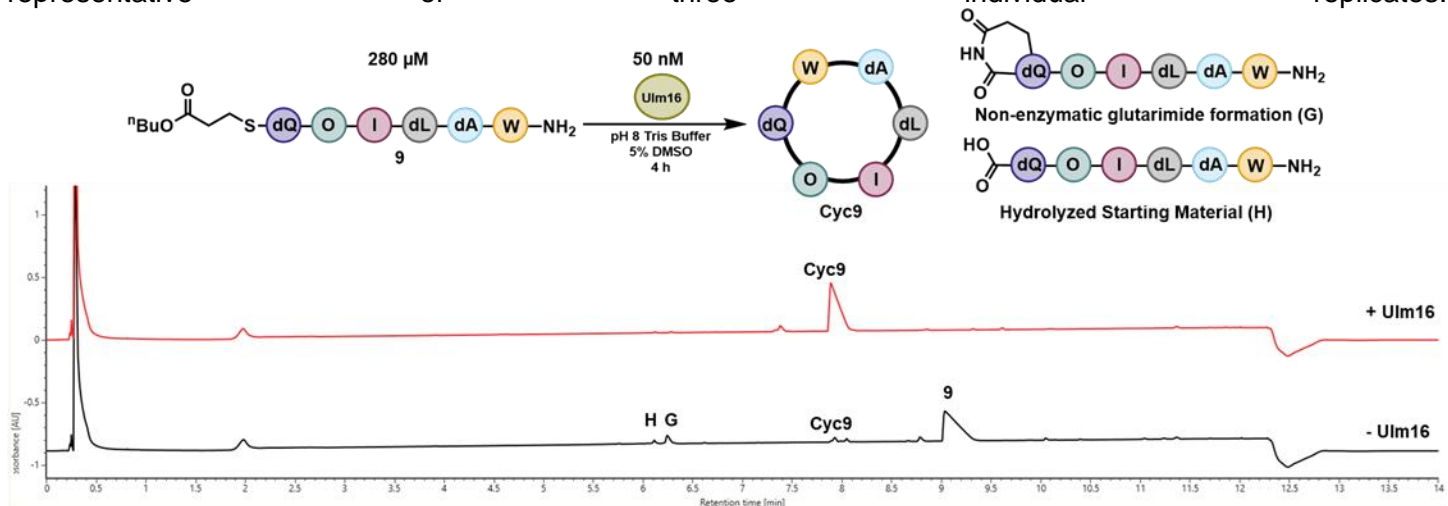

**Supplementary Fig. 12: *In vitro* reaction of Ulm16 with Ulm-SBMP where D-Val was replaced by D-Ala (9).** Enzyme and substrate concentrations are indicated above each reaction in the figure. The substrates are labeled with their corresponding numbers from the paper, while 'Cyc' and 'H' represent head-to-tail cyclic and hydrolyzed linear compounds, respectively. 'G' represents non-enzymatic glutarimide formation, which can occur due to extended incubation periods in the absence of enzyme (-Ulm16). All UPLC UV traces (214 nm) are representative



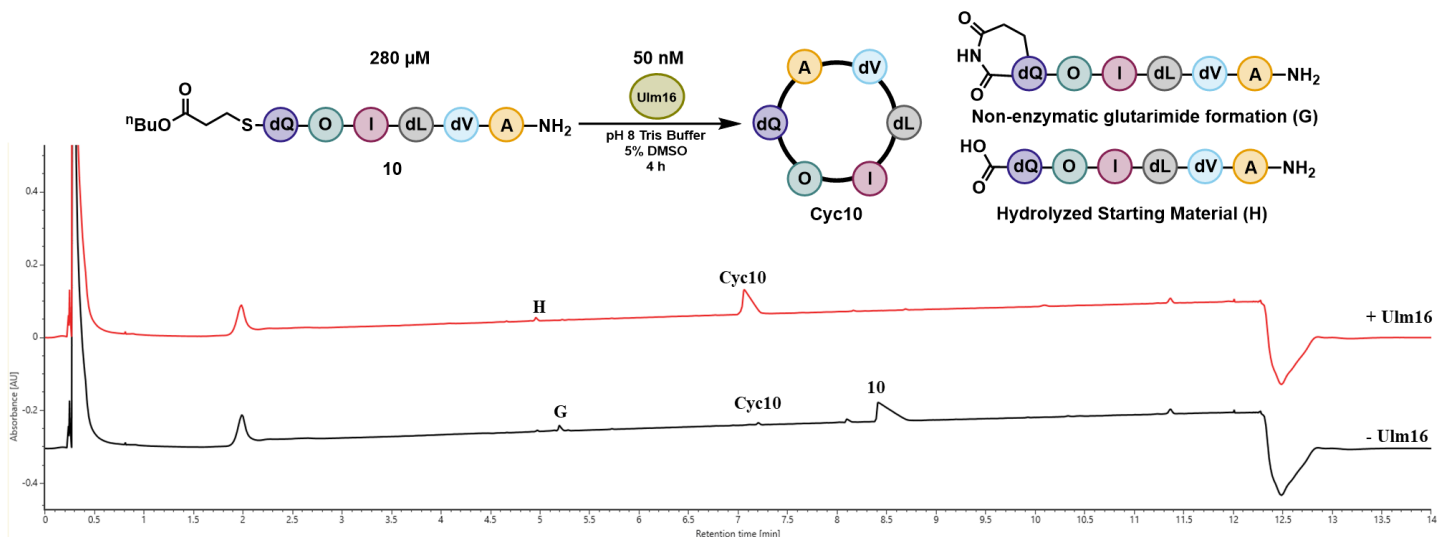

**Supplementary Fig. 13: *In vitro* reaction of Ulm16 with Ulm-SBMP where L-Trp was replaced by L-Ala (10).** Enzyme and substrate concentrations are indicated above each reaction in the figure. The substrates are labeled with their corresponding numbers from the paper, while 'Cyc' and 'H' represent head-to-tail cyclic and hydrolyzed linear compounds, respectively. 'G' represents non-enzymatic glutarimide formation, which can occur due to extended incubation periods in the absence of enzyme (-Ulm16). All UPLC UV traces (214 nm) are representative

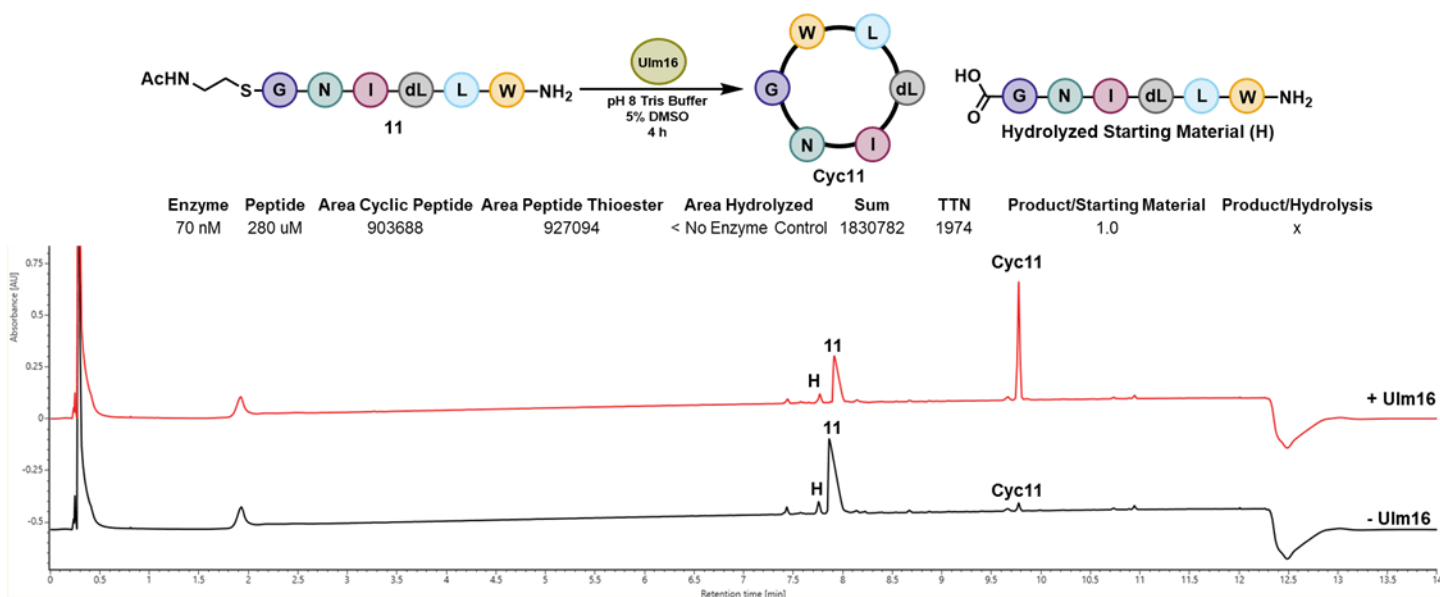

**Supplementary Fig. 14: The UPLC UV trace (214 nm) displays the total turnover number (TTN) assay results of Ulm16 with substrate 11.** The enzyme and substrate concentrations are noted in Supplementary Table 1 and above the trace, and the substrates are labeled with their corresponding numbers from the paper. The nomenclatures 'Cyc' and 'H' represent head-to-tail cyclic and hydrolyzed linear compounds, respectively. The UPLC trace represents three individual replicates, while the TTN and product to hydrolysis/starting material ratios are averages of three replicates. It is important to note that in the case of these specific substrates, the no enzyme control (-Ulm16) showed more hydrolysis, and thus it was not possible to determine an exact product/hydrolysis ratio.

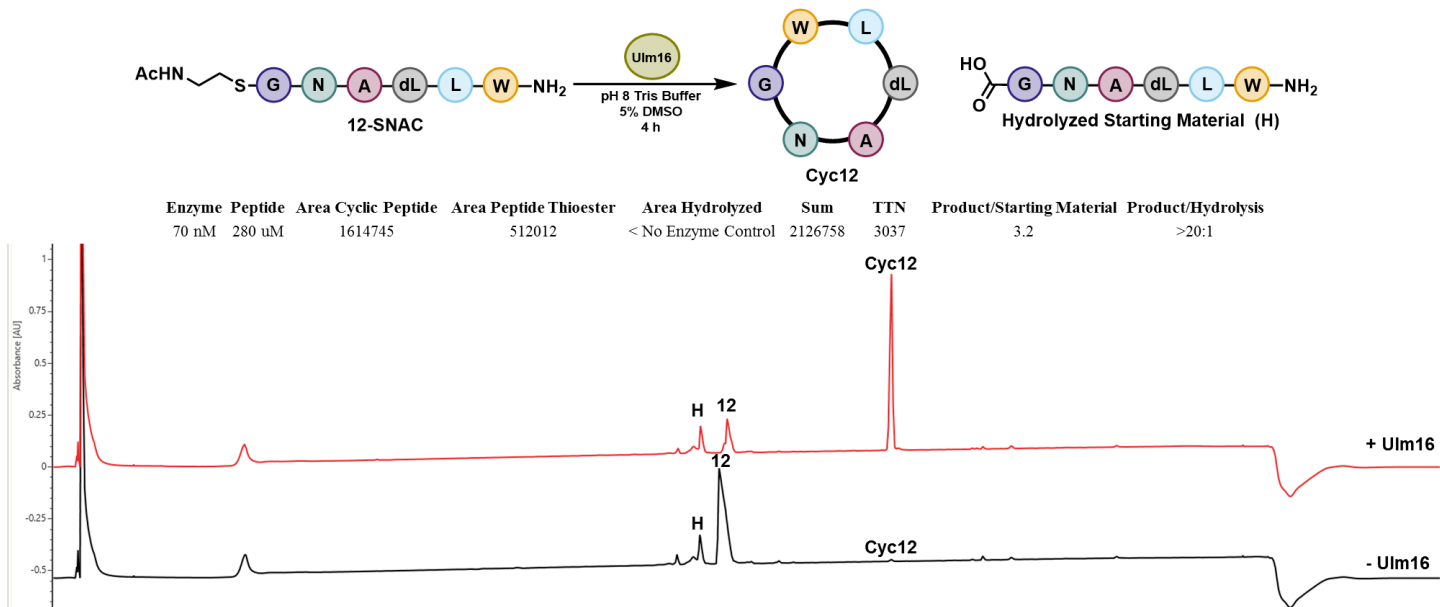

**Supplementary Fig. 15: The UPLC UV trace (214 nm) displays the total turnover number (TTN) assay results of Ulm16 with substrate 12-SNAC.** The enzyme and substrate concentrations are noted in Supplementary Table 1 and above the trace, and the substrates are labeled with their corresponding numbers from the paper. The nomenclatures 'Cyc' and 'H' represent head-to-tail cyclic and hydrolyzed linear compounds, respectively. The UPLC trace represents three individual replicates, while the TTN and product to hydrolysis/starting material ratios are averages of three replicates. It is important to note that in the case of these specific substrates, the no enzyme control (-Ulm16) showed more hydrolysis, and thus it was not possible to determine an exact product/hydrolysis ratio.

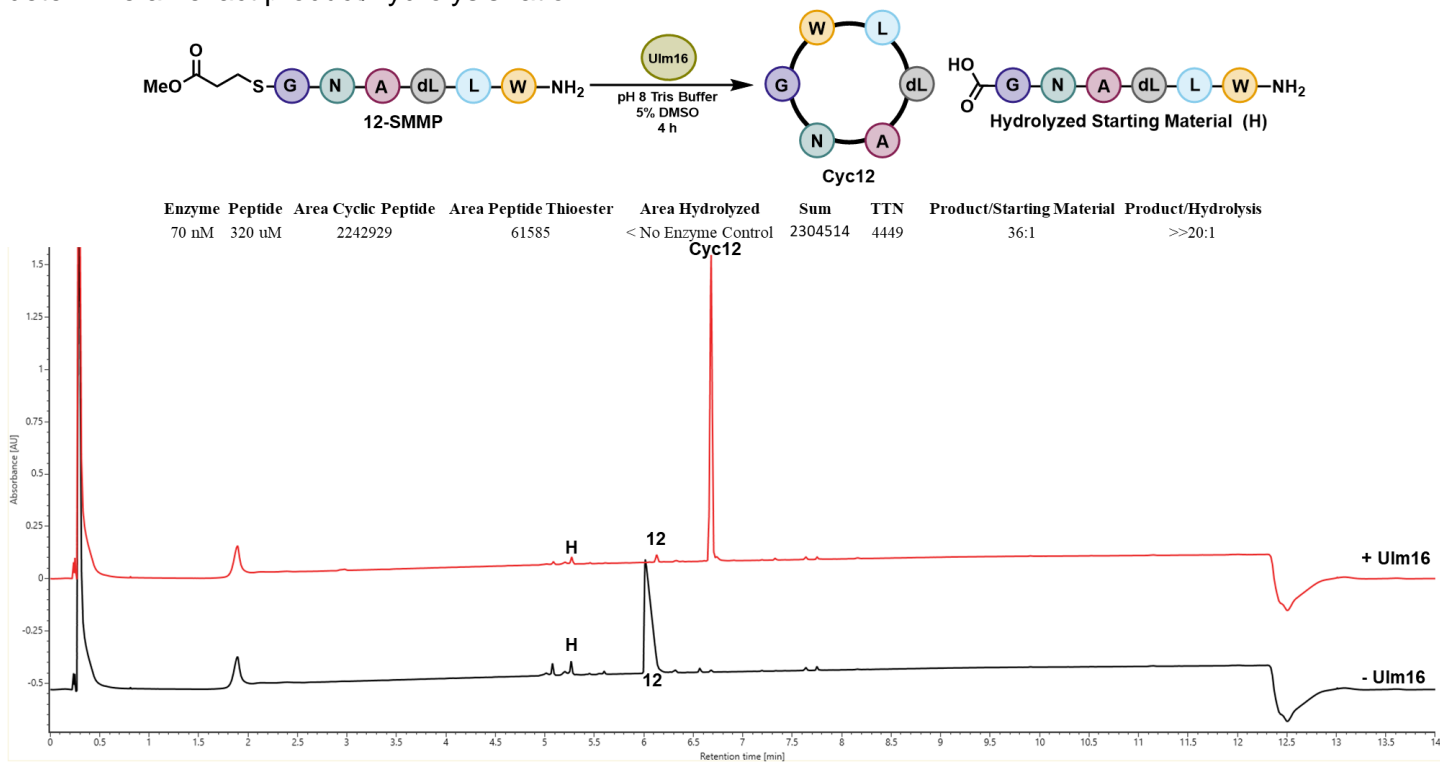

**Supplementary Fig. 16: The UPLC UV trace (214 nm) displays the total turnover number (TTN) assay results of Ulm16 with substrate 12-SMMP.** The enzyme and substrate concentrations are noted in Supplementary Table 1 and above the trace, and the substrates are labeled with their corresponding numbers from the paper. The nomenclatures 'Cyc' and 'H' represent head-to-tail cyclic and hydrolyzed linear compounds,

respectively. The UPLC trace represents three individual replicates, while the TTN and product to hydrolysis/starting material ratios are averages of three replicates. It is important to note that in the case of these specific substrates, the no enzyme control (-Ulm16) showed more hydrolysis, and thus it was not possible to determine an exact product/hydrolysis ratio. The reaction was analyzed with a 0 to 70% (Acetonitrile 0.1% Formic acid) gradient instead of the typical 0 to 40%

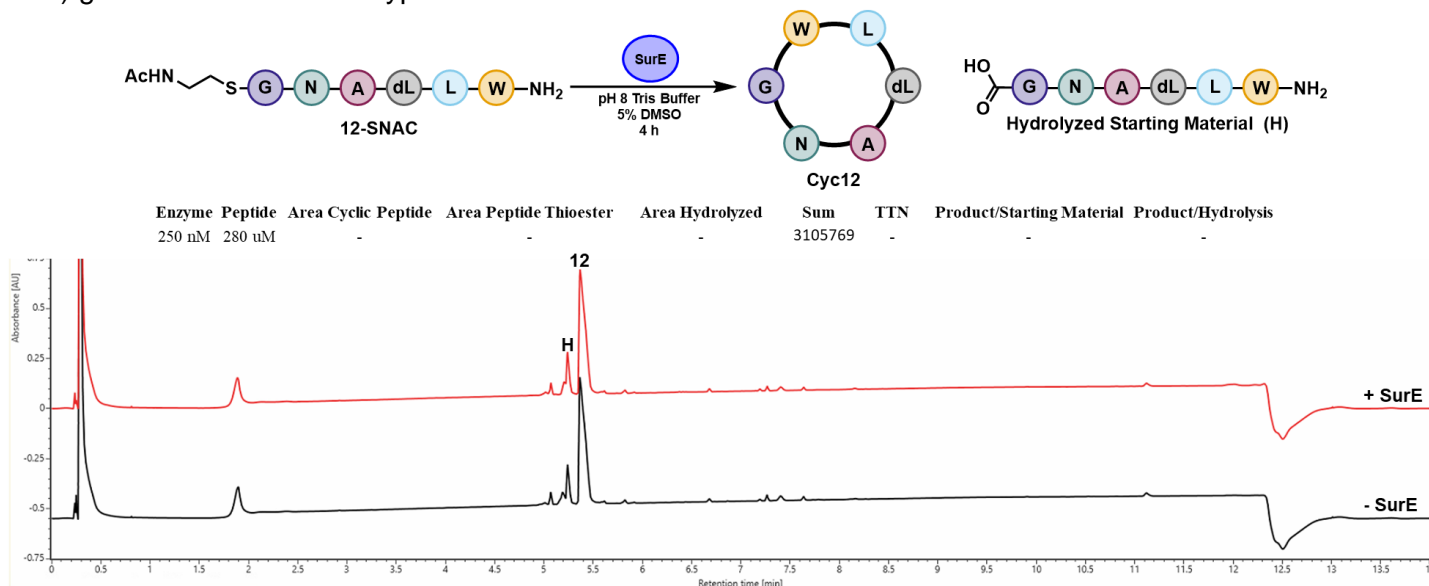

**Supplementary Fig. 17: The UPLC UV trace (214 nm) displays the total turnover number (TTN) assay results of SurE with substrate 12-SNAC.** The enzyme and substrate concentrations are noted in Supplementary Table 1 and above the trace, and the substrates are labeled with their corresponding numbers from the paper. The nomenclatures 'Cyc' and 'H' represent head-to-tail cyclic and hydrolyzed linear compounds, respectively. The UPLC trace represents three individual replicates, while the TTN and product to hydrolysis/starting material ratios are averages of three replicates. It is important to note that in the case of these specific substrates, the no enzyme control (-Ulm16) showed more hydrolysis, and thus it was not possible to determine an exact product/hydrolysis ratio. No significant difference was observed between the +/- SurE Samples. The reaction was analyzed with a 0 to 70% (Acetonitrile 0.1% Formic acid) gradient instead of the typical 0 to 40%

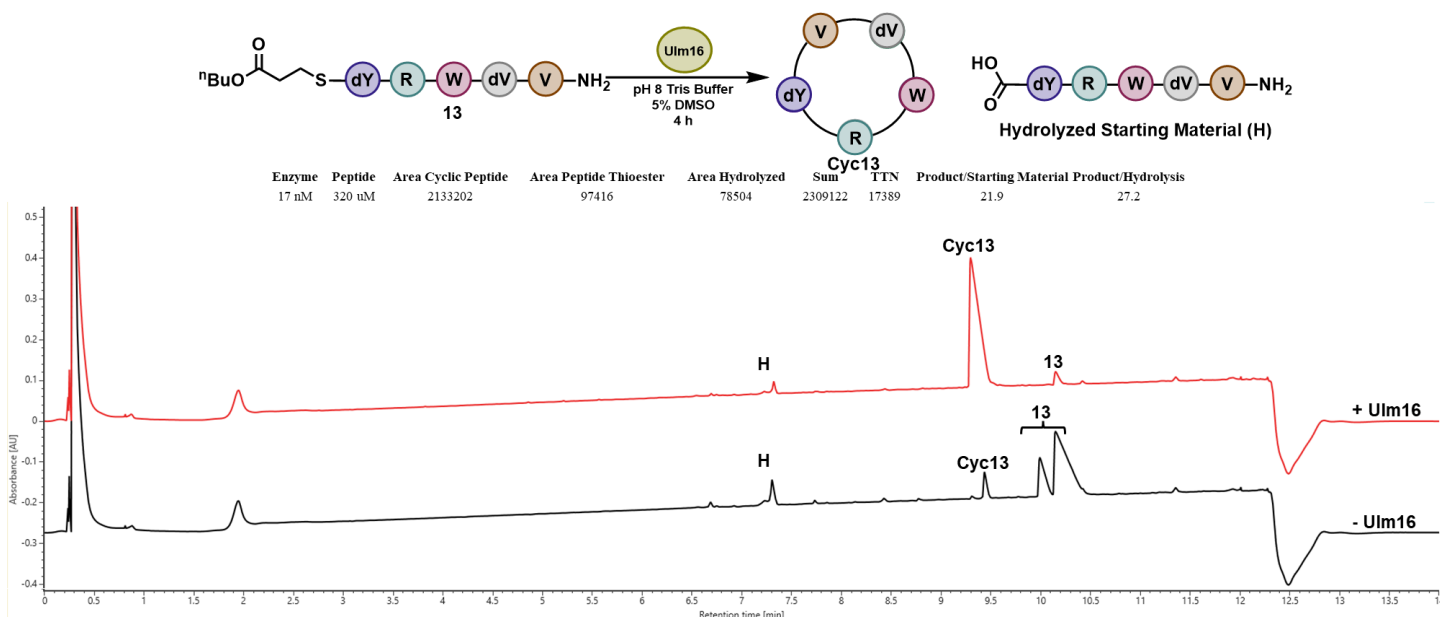

**Supplementary Fig. 18: UPLC UV trace (214 nm) is shown for the total turnover number (TTN) assay of Ulm16 with a substrate of a known PBP-TE PenA (13).** The enzyme and substrate concentrations are indicated above the trace. The substrates are labeled with their corresponding numbers from the paper, while 'Cyc' and 'H' represent head-to-tail cyclic and hydrolyzed linear compounds, respectively. The UPLC trace is representative of three individual replicates, while the TTN and product to hydrolysis/starting material ratios are averages of three replicates.

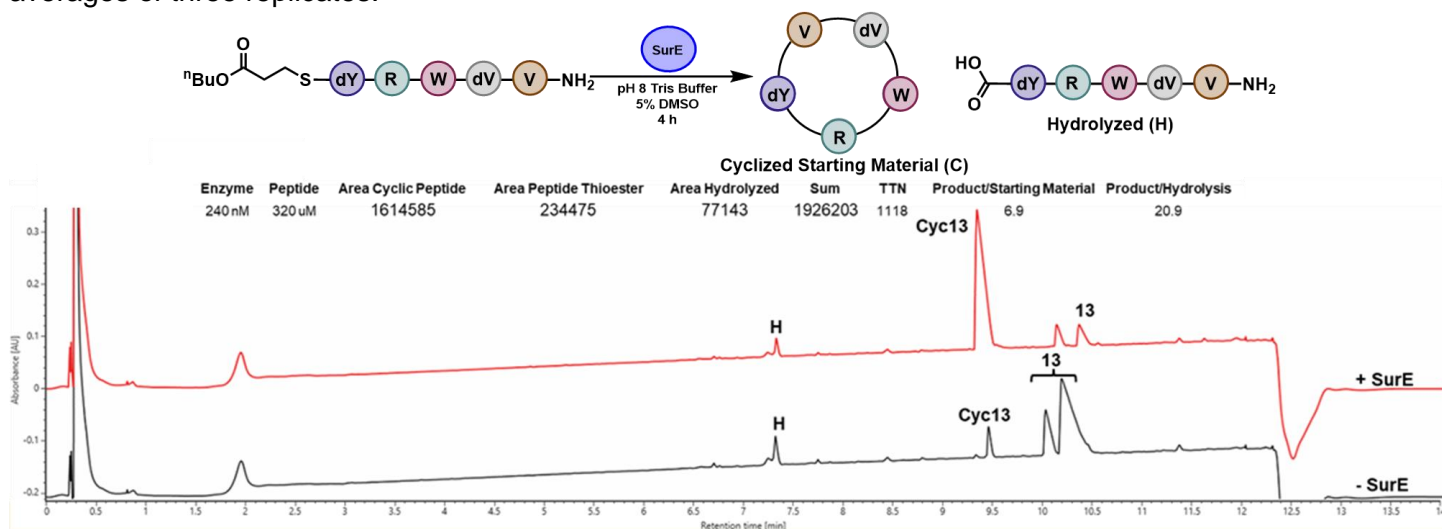

**Supplementary Fig. 19: UPLC UV trace (214 nm) is shown for the total turnover number (TTN) assay of SurE with a substrate of a known PBP-TE PenA (13).** The enzyme and substrate concentrations are indicated above the trace. The substrates are labeled with their corresponding numbers from the paper, while 'Cyc' and 'H' represent head-to-tail cyclic and hydrolyzed linear compounds, respectively. The UPLC trace is representative of three individual replicates, while the TTN and product to hydrolysis/starting material ratios are averages of three replicates.

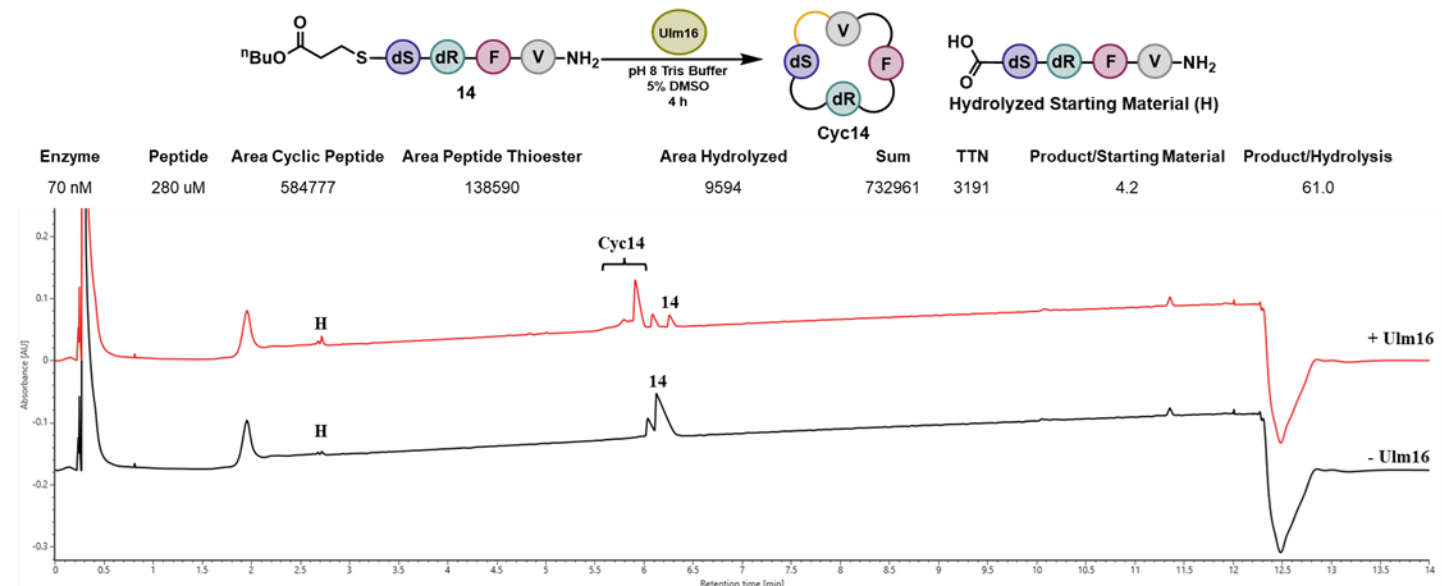

**Supplementary Fig. 20: UPLC UV trace (214 nm) is shown for the total turnover number (TTN) assay of Ulm16 with tetrapeptide substrate 14.** The enzyme and substrate concentrations are indicated above the trace. The substrates are labeled with their corresponding numbers from the paper, while 'Cyc' and 'H' represent head-to-tail cyclic and hydrolyzed linear compounds, respectively. 'HD' and 'CD' represent hydrolyzed dimer and cyclic dimer, respectively. The UPLC trace is representative of three individual replicates, while the TTN and product to hydrolysis/starting material ratios are averages of three replicates.

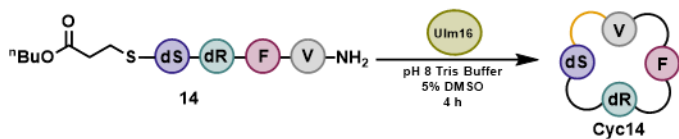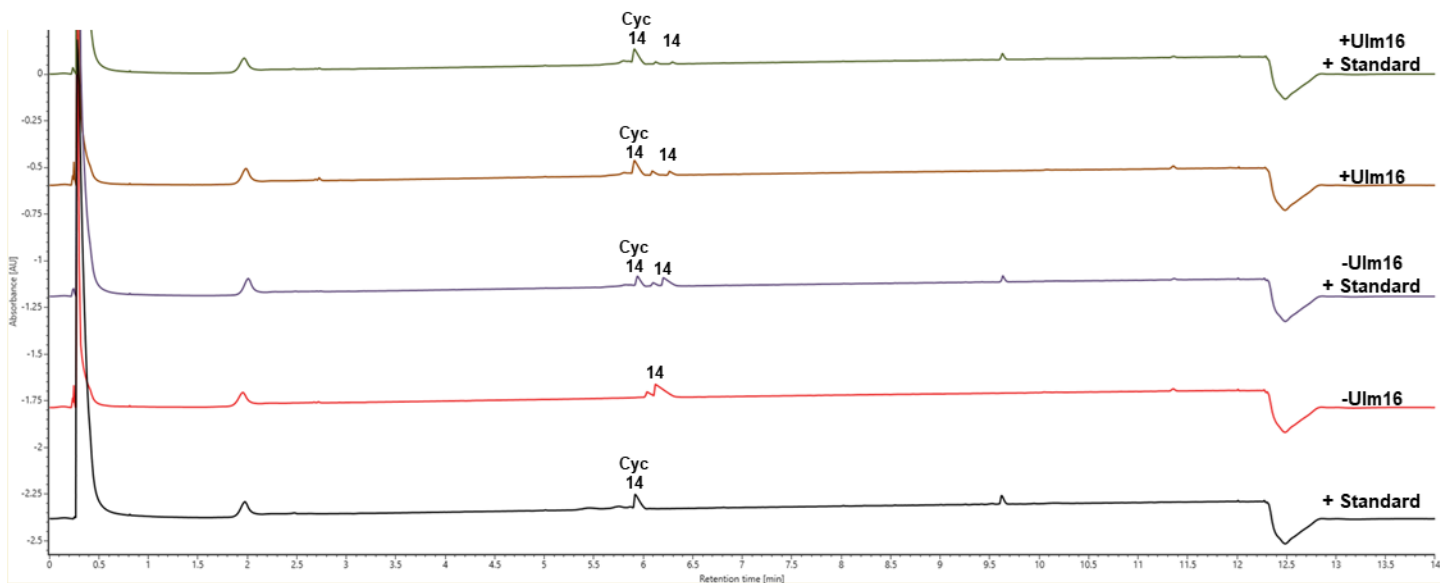

**Supplementary Fig. 21: Spiking with synthetic standard to confirm cyclic tetrapeptide.** UPLC UV trace (214 nm) for the total turnover number (TTN) assay of Ulm16 with substrate 14, which was previously seen in Supplementary Fig. 26. To confirm the identity of the cyclic product, a purified cyclic standard from a previous publication<sup>2</sup> was used.

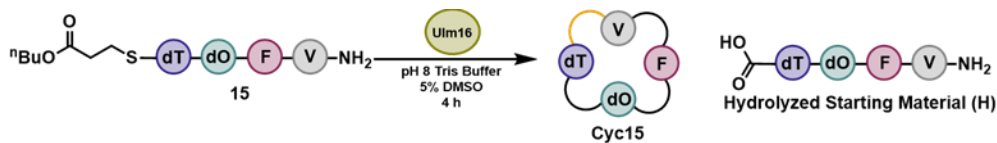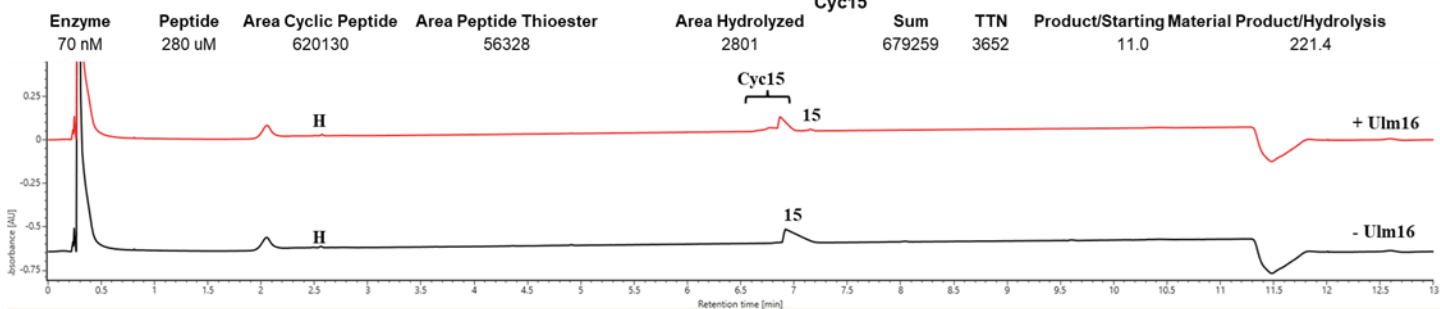

**Supplementary Fig. 22: UPLC UV trace (214 nm) is shown for the total turnover number (TTN) assay of Ulm16 with tetrapeptide substrate 15.** The enzyme and substrate concentrations are indicated above the trace. The substrates are labeled with their corresponding numbers from the paper, while 'Cyc' and 'H' represent head-to-tail cyclic and hydrolyzed linear compounds, respectively. 'HD' and 'CD' represent hydrolyzed dimer and cyclic dimer, respectively. The UPLC trace is representative of three individual replicates, while the TTN and product to hydrolysis/starting material ratios are averages of three replicates.

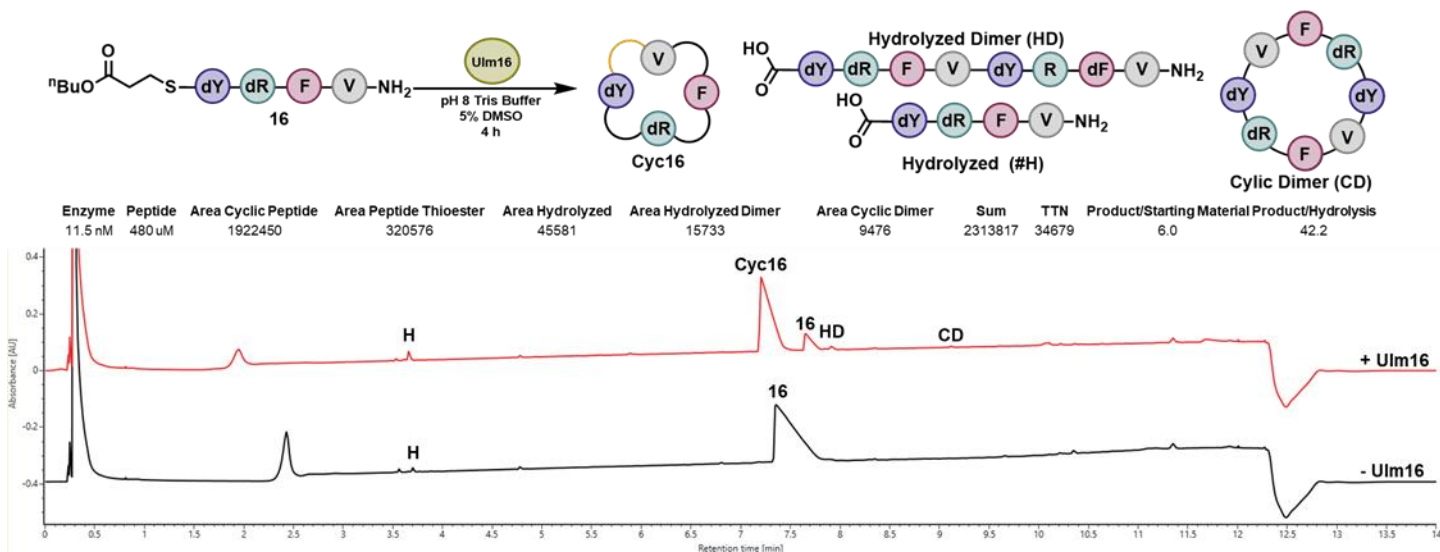

**Supplementary Fig. 23: UPLC UV trace (214 nm) is shown for the total turnover number (TTN) assay of Ulm16 with tetrapeptide substrate 16.** The enzyme and substrate concentrations are indicated above the trace. The substrates are labeled with their corresponding numbers from the paper, while 'Cyc' and 'H' represent head-to-tail cyclic and hydrolyzed linear compounds, respectively. 'HD' and 'CD' represent hydrolyzed dimer and cyclic dimer, respectively. The UPLC trace is representative of three individual replicates, while the TTN and product to hydrolysis/starting material ratios are averages of three replicates.

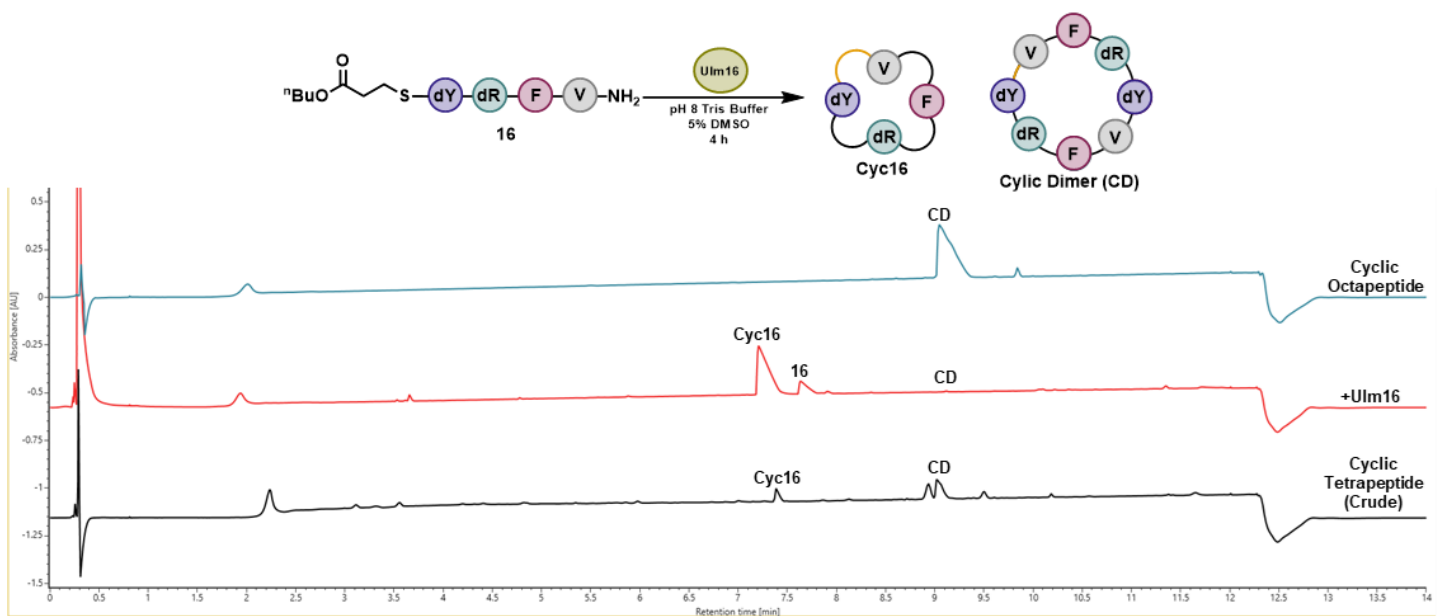

**Supplementary Fig. 24: Spiking with synthetic standard to confirm cyclic tetrapeptide.** UPLC UV trace (214 nm) for the total turnover number (TTN) assay of Ulm16 with substrates 16, which was previously seen in Supplementary Fig. 27. To confirm the identity of the cyclic product, cyclic tetrapeptide standards and a cyclic octapeptide standard, which would be the head-to-tail cyclic dimerized product of substrate 16, were used. The cyclic tetrapeptide of substrate 16 matched in retention time but could not be isolated during purification (top panel). The cyclic octapeptide (CD) matched in retention time with a peak observed at ~9 minutes in the enzyme reaction, but not enough was produced to accurately determine a ratio.

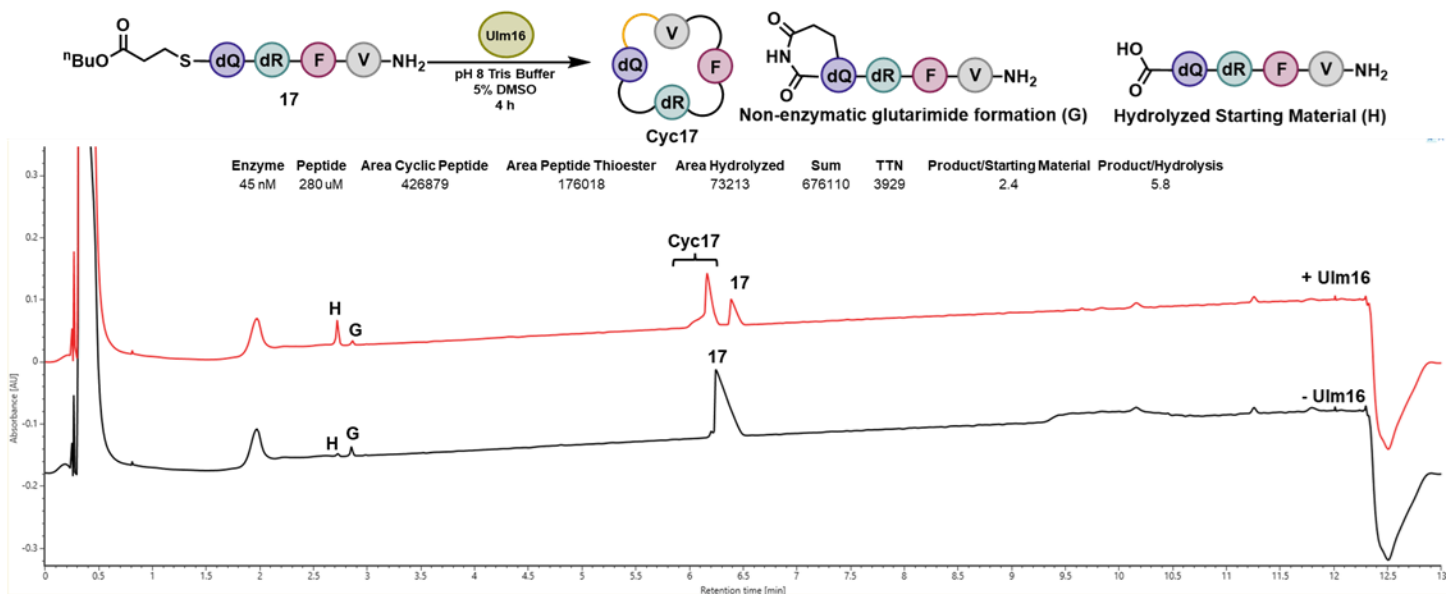

**Supplementary Fig. 25: UPLC UV trace (214 nm) is shown for the total turnover number (TTN) assay of Ulm16 with tetrapeptide substrate 17.** The enzyme and substrate concentrations are indicated above the trace. The substrates are labeled with their corresponding numbers from the paper, while 'Cyc' and 'H' represent head-to-tail cyclic and hydrolyzed linear compounds, respectively. The UPLC trace is representative of three individual replicates, while the TTN and product to hydrolysis/starting material ratios are averages of three replicates.

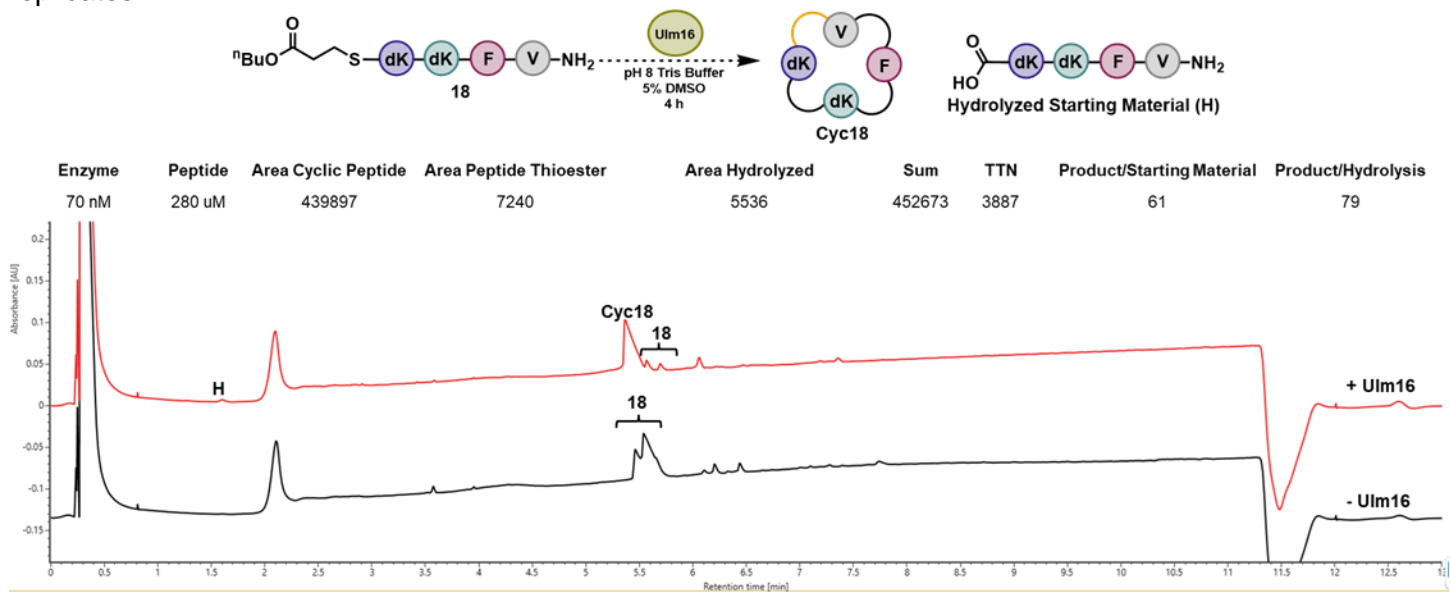

**Supplementary Fig. 26: UPLC UV trace (214 nm) is shown for the total turnover number (TTN) assay of Ulm16 with tetrapeptide substrate 18.** The enzyme and substrate concentrations are indicated above the trace. The substrates are labeled with their corresponding numbers from the paper, while 'Cyc' and 'H' represent head-to-tail cyclic and hydrolyzed linear compounds, respectively. The UPLC trace is representative of three individual replicates, while the TTN and product to hydrolysis/starting material ratios are averages of three replicates.

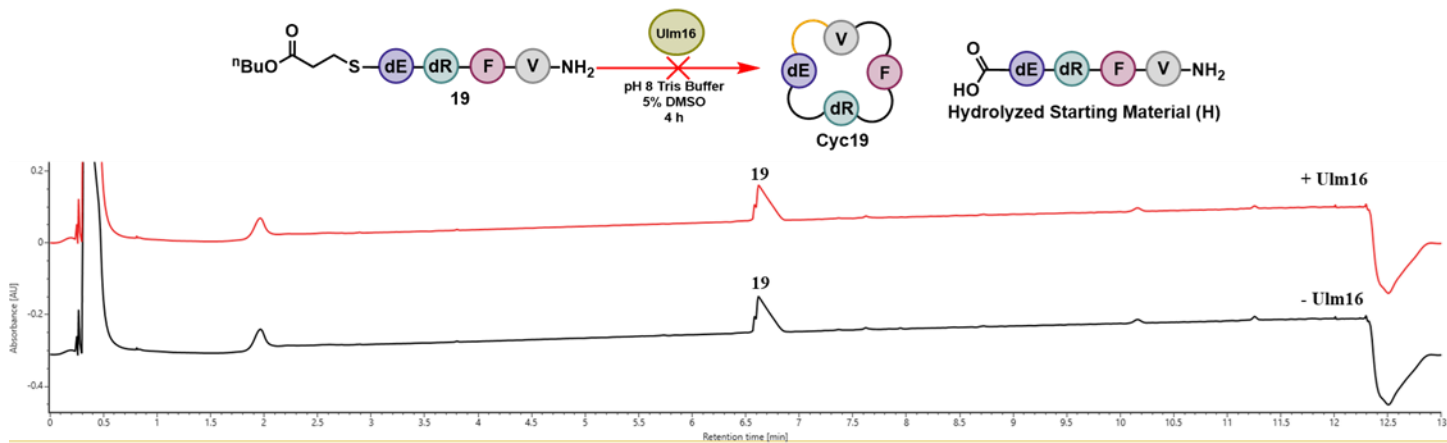

**Supplementary Fig. 27: UPLC UV trace (214 nm) is shown for the total turnover number (TTN) assay of Ulm16 with tetrapeptide substrates 19.** The enzyme and substrate concentrations are indicated above the trace. The substrates are labeled with their corresponding numbers from the paper, while 'Cyc' and 'H' represent head-to-tail cyclic and hydrolyzed linear compounds, respectively. The UPLC trace is representative of three individual replicates, while the TTN and product to hydrolysis/starting material ratios are averages of three replicates.

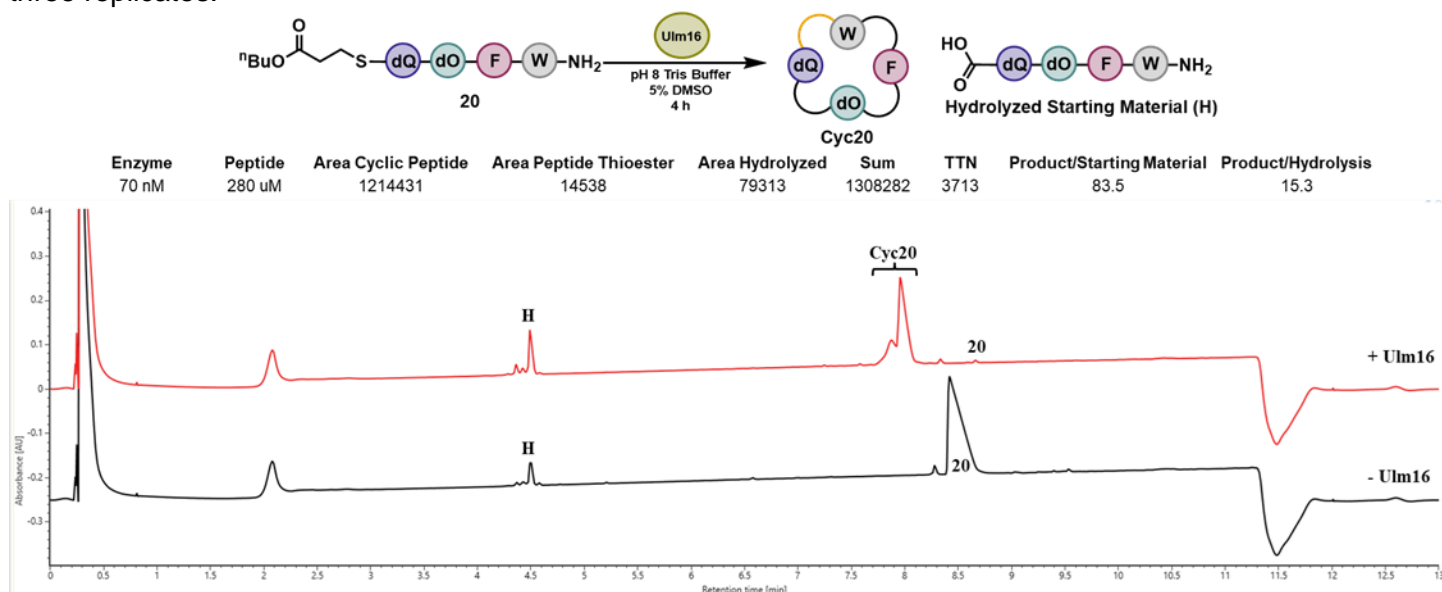



**Supplementary Fig. 28: UPLC UV trace (214 nm) for the total turnover number (TTN) assay of Ulm16 with tetrapeptide substrates 20.** The enzyme and substrate concentrations are indicated above the trace. The substrates are labeled with their corresponding numbers from the paper, while 'Cyc' and 'H' represent head-to-tail cyclic and hydrolyzed linear compounds, respectively.

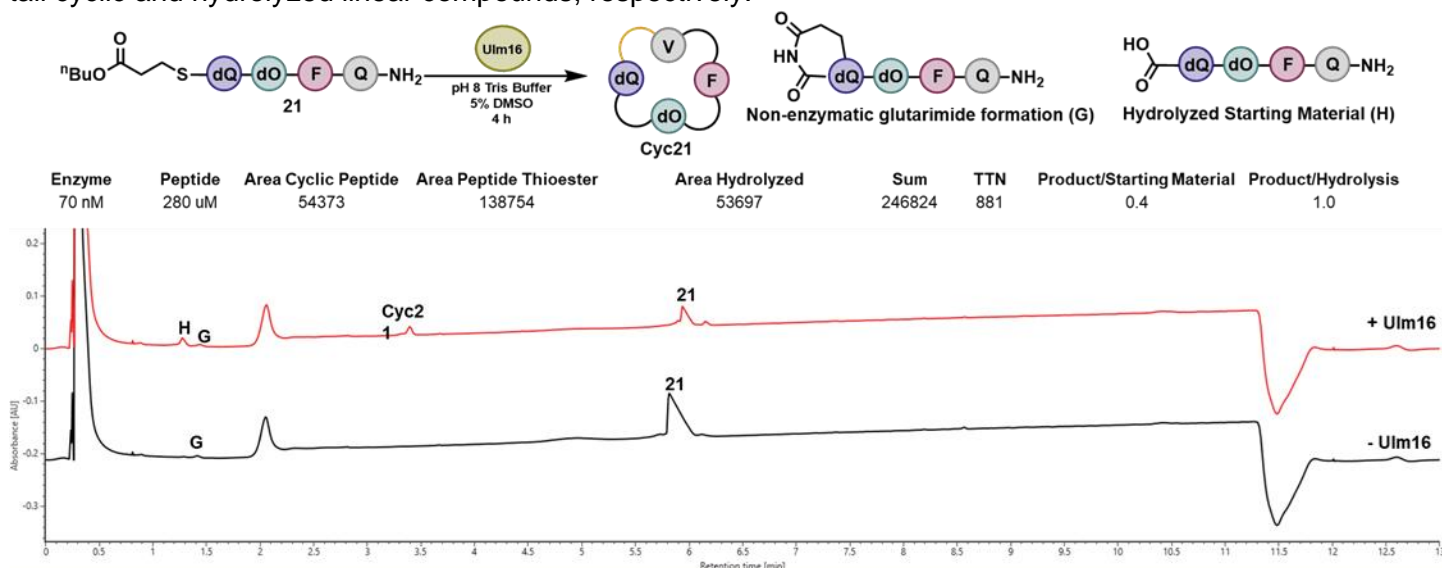

**Supplementary Fig. 29: UPLC UV trace (214 nm) for the total turnover number (TTN) assay of Ulm16 with tetrapeptide substrates 21.** The enzyme and substrate concentrations are indicated above the trace. The substrates are labeled with their corresponding numbers from the paper, while 'Cyc' and 'H' represent head-to-tail cyclic and hydrolyzed linear compounds, respectively.

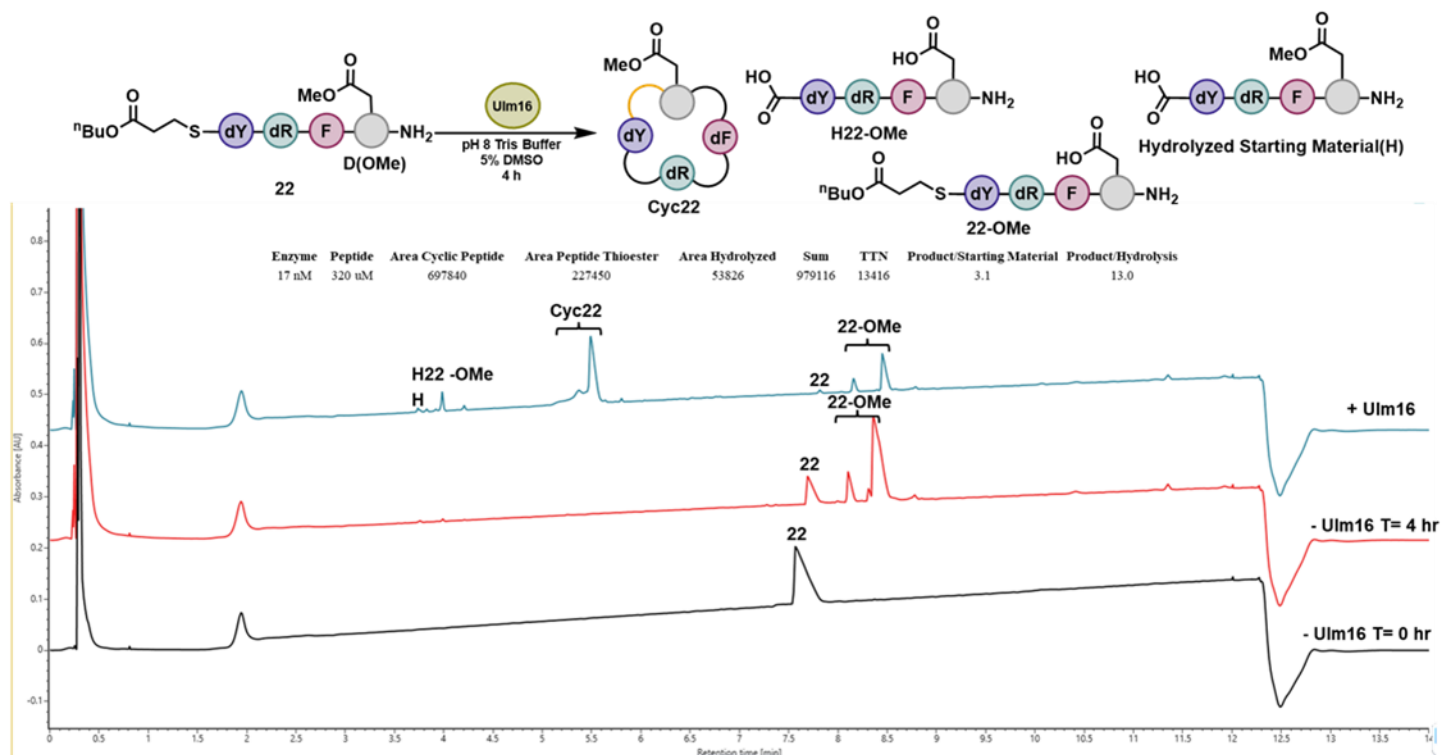

**Supplementary Fig. 30: UPLC UV trace (214 nm) for the total turnover number (TTN) assay of Ulm16 with tetrapeptide substrates 22.** The enzyme and substrate concentrations are indicated above the trace. The substrates are labeled with their corresponding numbers from the paper, while 'Cyc' and 'H' represent head-to-tail cyclic and hydrolyzed linear compounds, respectively. Rapid asparamide formation at the C-terminus resulted in both epimerization and deprotection of the N-Terminal aspartate. This phenomenon was also observed in an

allyl glycine-protected variant (data not shown), but no cyclic product corresponding to the deprotected peptide with an N-Terminal aspartate was observed. The UPLC trace is representative of three individual replicates, while the TTN and product to hydrolysis/starting material ratios are averages of three replicates.

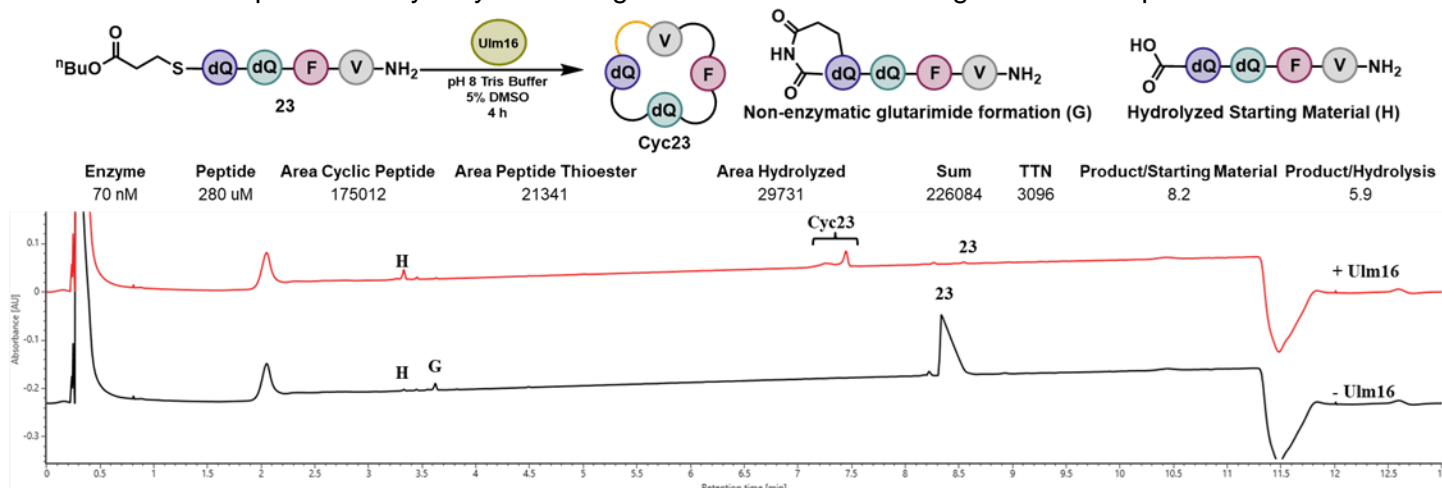

**Supplementary Fig. 31: UPLC UV trace (214 nm) for the total turnover number (TTN) assay of Ulm16 with tetrapeptide substrates 23.** The enzyme and substrate concentrations are indicated above the trace. The substrates are labeled with their corresponding numbers from the paper, while 'Cyc' and 'H' represent head-to-tail cyclic and hydrolyzed linear compounds, respectively. The UPLC trace is representative of three individual replicates, while the TTN and product to hydrolysis/starting material ratios are averages of three replicates.

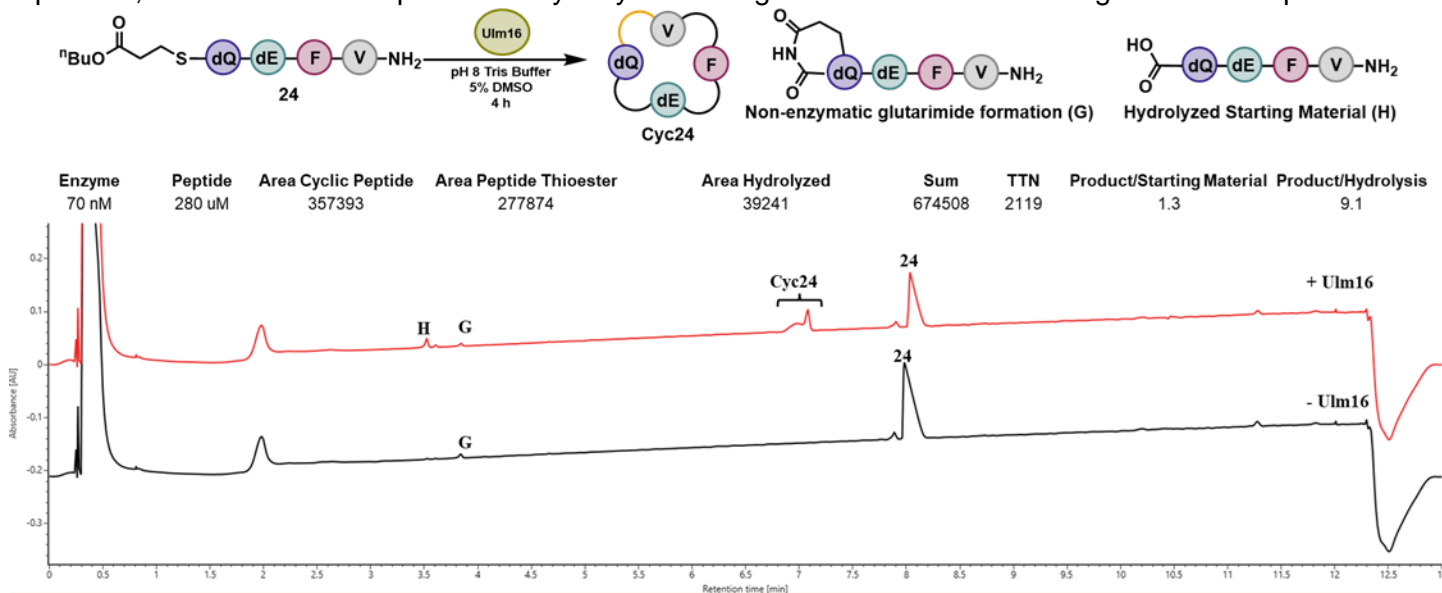

**Supplementary Fig. 32: UPLC UV trace (214 nm) for the total turnover number (TTN) assay of Ulm16 with tetrapeptide substrates 24.** The enzyme and substrate concentrations are indicated above the trace. The substrates are labeled with their corresponding numbers from the paper, while 'Cyc' and 'H' represent head-to-tail cyclic and hydrolyzed linear compounds, respectively. The UPLC trace is representative of three individual replicates, while the TTN and product to hydrolysis/starting material ratios are averages of three replicates.

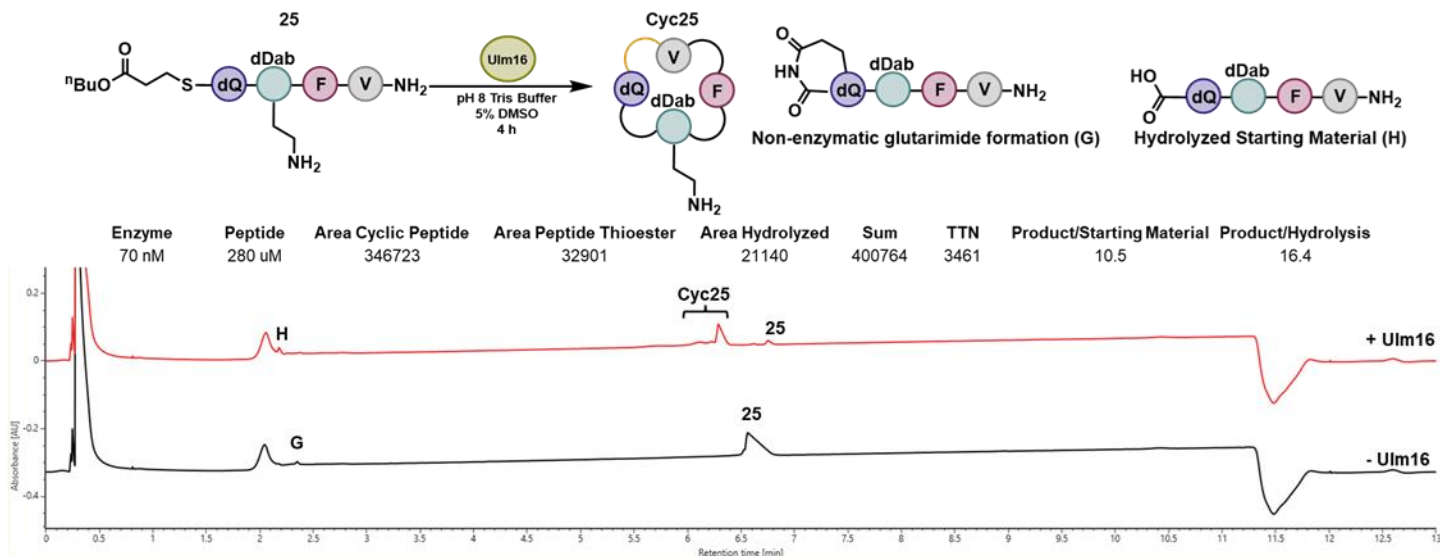

**Sup Supplementary Fig. 33: UPLC UV trace (214 nm) for the total turnover number (TTN) assay of Ulm16 with tetrapeptide substrates 25.** The enzyme and substrate concentrations are indicated above the trace. The substrates are labeled with their corresponding numbers from the paper, while 'Cyc' and 'H' represent head-to-tail cyclic and hydrolyzed linear compounds, respectively. The UPLC trace is representative of three individual replicates, while the TTN and product to hydrolysis/starting material ratios are averages of three replicates.

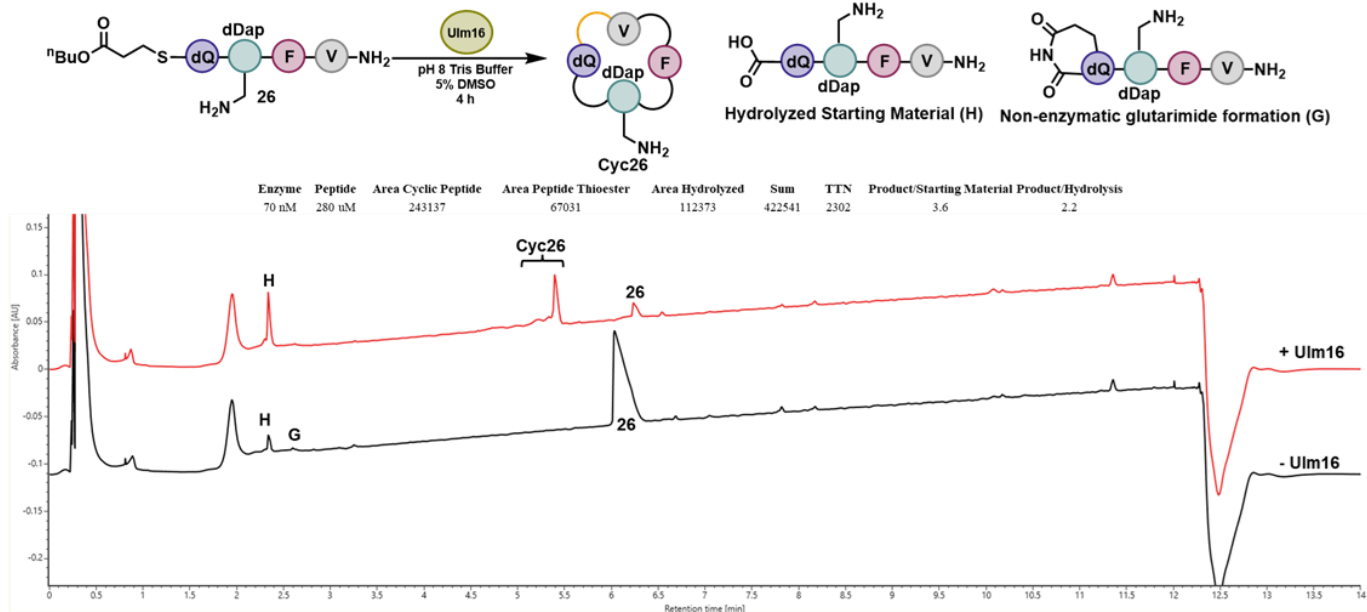

**Supplementary Fig. 34: UPLC UV trace (214 nm) for the total turnover number (TTN) assay of Ulm16 with tetrapeptide substrates 26.** The enzyme and substrate concentrations are indicated above the trace. The substrates are labeled with their corresponding numbers from the paper, while 'Cyc' and 'H' represent head-to-tail cyclic and hydrolyzed linear compounds, respectively. The UPLC trace is representative of three individual replicates, while the TTN and product to hydrolysis/starting material ratios are averages of three replicates.

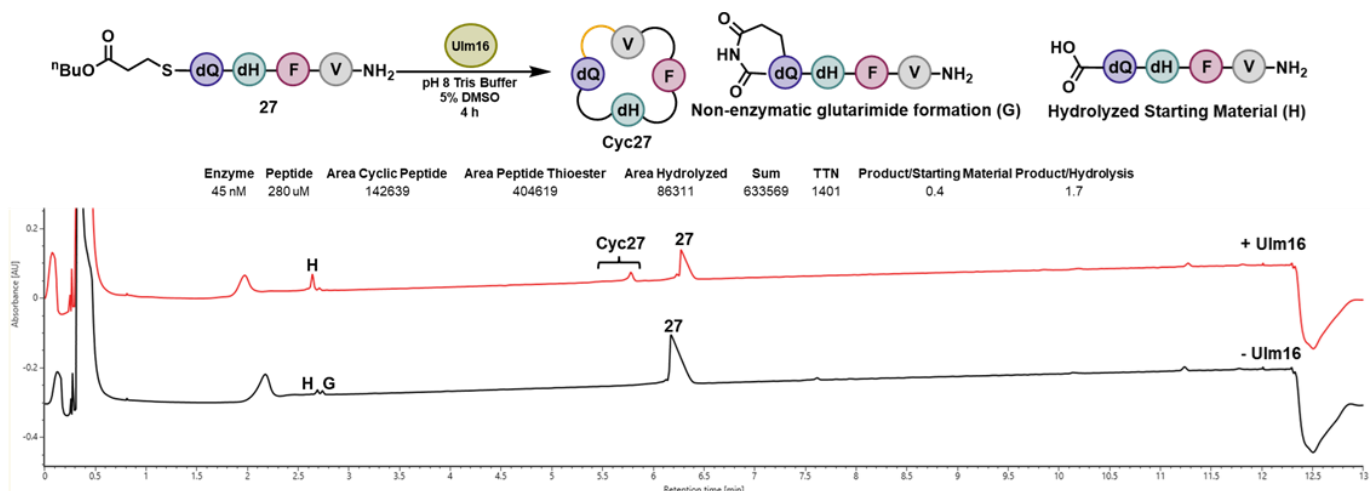

**Supplementary Fig. 35: UPLC UV trace (214 nm) for the total turnover number (TTN) assay of Ulm16 with tetrapeptide substrates 27.** The enzyme and substrate concentrations are indicated above the trace. The substrates are labeled with their corresponding numbers from the paper, while 'Cyc' and 'H' represent head-to-tail cyclic and hydrolyzed linear compounds, respectively. The UPLC trace is representative of three individual replicates, while the TTN and product to hydrolysis/starting material ratios are averages of three replicates.

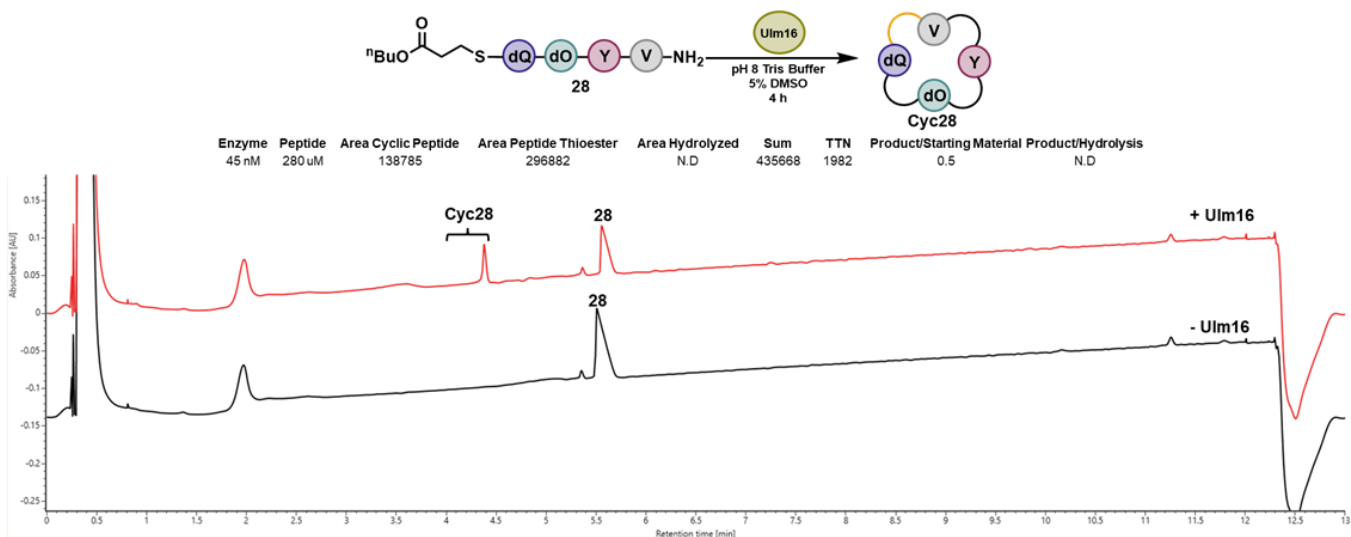

**Supplementary Fig. 36: UPLC UV trace (214 nm) for the total turnover number (TTN) assay of Ulm16 with tetrapeptide substrates 28.** The enzyme and substrate concentrations are indicated above the trace. The substrates are labeled with their corresponding numbers from the paper, while 'Cyc' and 'H' represent head-to-tail cyclic and hydrolyzed linear compounds, respectively. The UPLC trace is representative of three individual replicates, while the TTN and product to hydrolysis/starting material ratios are averages of three replicates.

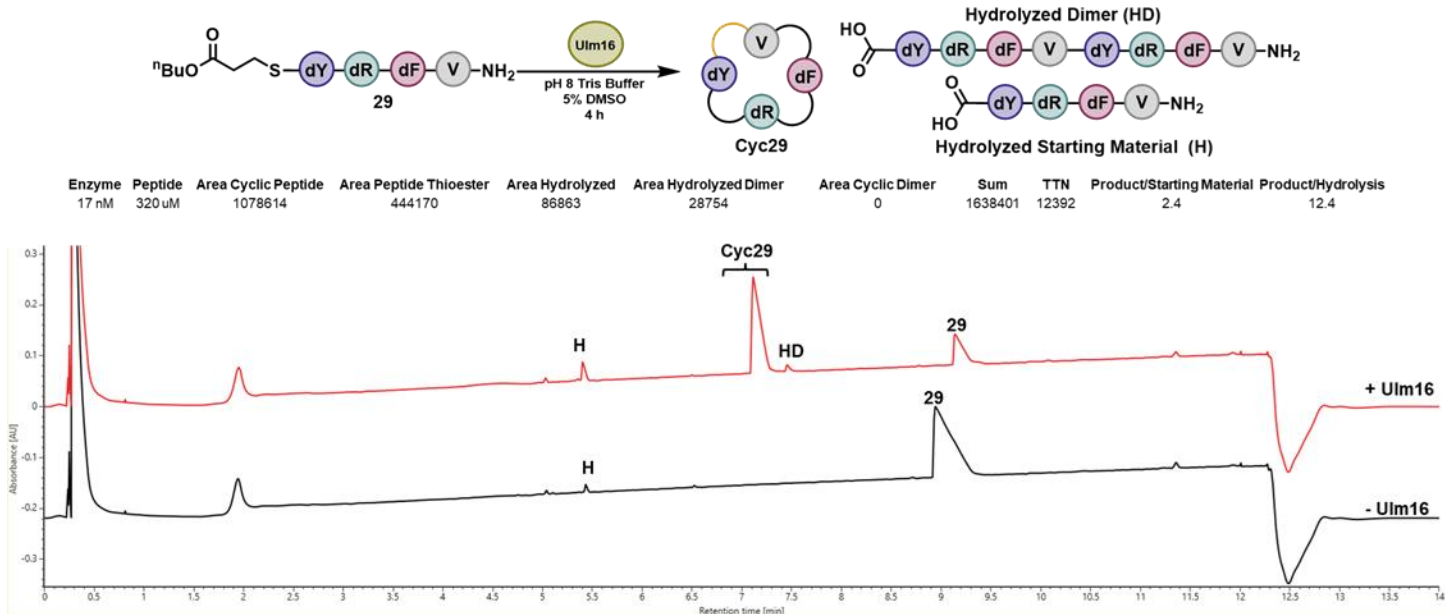

**Supplementary Fig. 37: UPLC UV trace (214 nm) for the total turnover number (TTN) assay of Ulm16 with tetrapeptide substrates 29.** The enzyme and substrate concentrations are indicated above the trace. The substrates are labeled with their corresponding numbers from the paper, while 'Cyc' and 'H' represent head-to-tail cyclic and hydrolyzed linear compounds, respectively. While CD and HD represent head-to-tail cyclized dimerized product and hydrolyzed dimerized product, respectively. The UPLC trace is representative of three individual replicates, while the TTN and product to hydrolysis/starting material ratios are averages of three replicates.

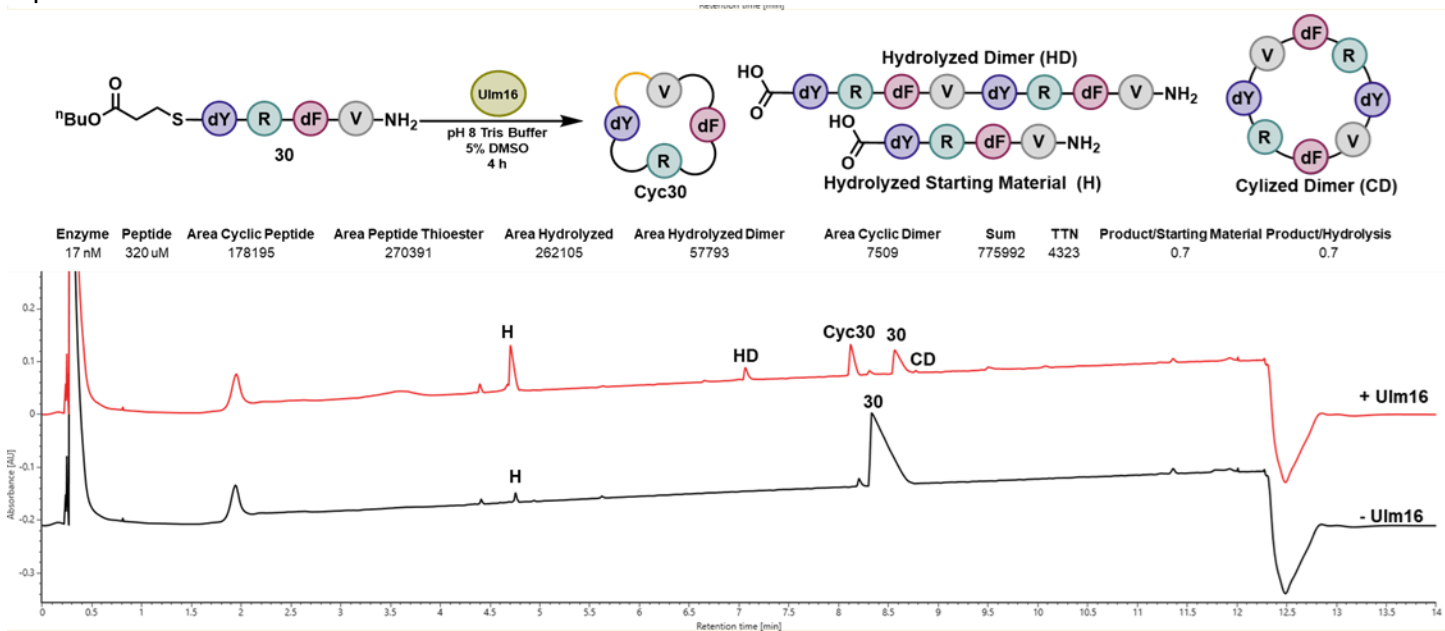

**Supplementary Fig. 38: UPLC UV trace (214 nm) for the total turnover number (TTN) assay of Ulm16 with tetrapeptide substrates 30.** The enzyme and substrate concentrations are indicated above the trace. The substrates are labeled with their corresponding numbers from the paper, while 'Cyc' and 'H' represent head-to-tail cyclic and hydrolyzed linear compounds, respectively. While CD and HD represent head-to-tail cyclized dimerized product and hydrolyzed dimerized product, respectively. The UPLC trace is representative of three individual replicates, while the TTN and product to hydrolysis/starting material ratios are averages of three replicates.

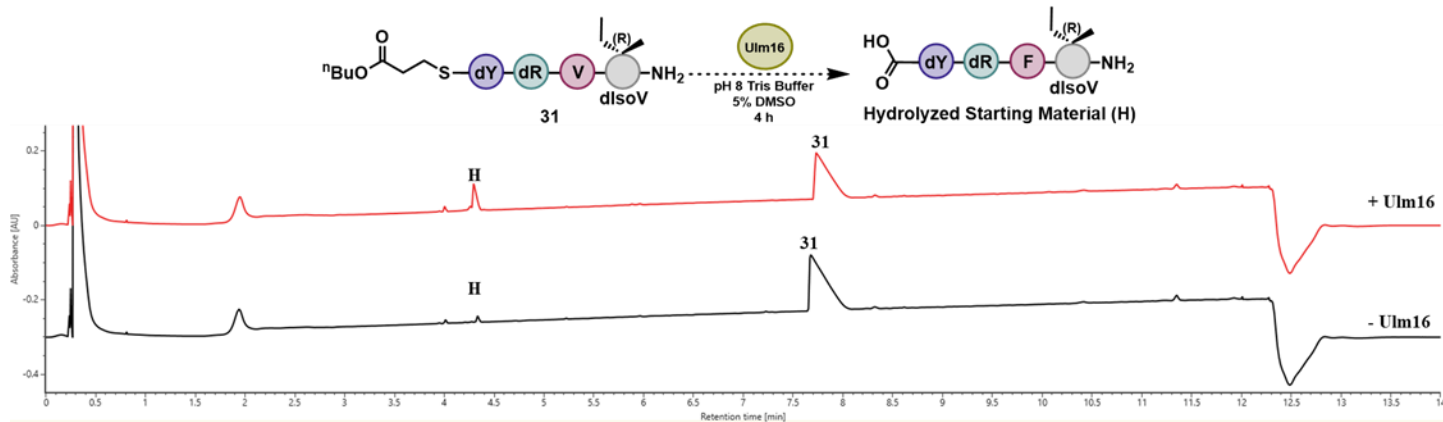

**Supplementary Fig. 39: UPLC UV trace (214 nm) for the total turnover number (TTN) assay of Ulm16 with tetrapeptide substrates 31.** The enzyme and substrate concentrations are indicated above the trace. The substrates are labeled with their corresponding numbers from the paper, while 'Cyc' and 'H' represent head-to-tail cyclic and hydrolyzed linear compounds, respectively. While CD and HD represent head-to-tail cyclized dimerized product and hydrolyzed dimerized product, respectively. The UPLC trace is representative of three individual replicates, while the TTN and product to hydrolysis/starting material ratios are averages of three replicates.

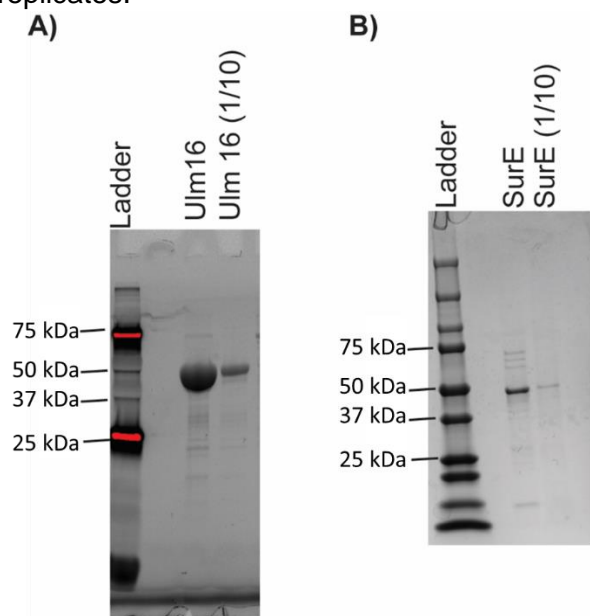

**Supplementary Fig. 40: Expression of Ulm16 and SurE.** A) Heterologous expression of Ulm16 and B) SurE. 1/10 indicates a 1/10 dilution of the initial protein stock used in the Ulm16 or SurE lane.

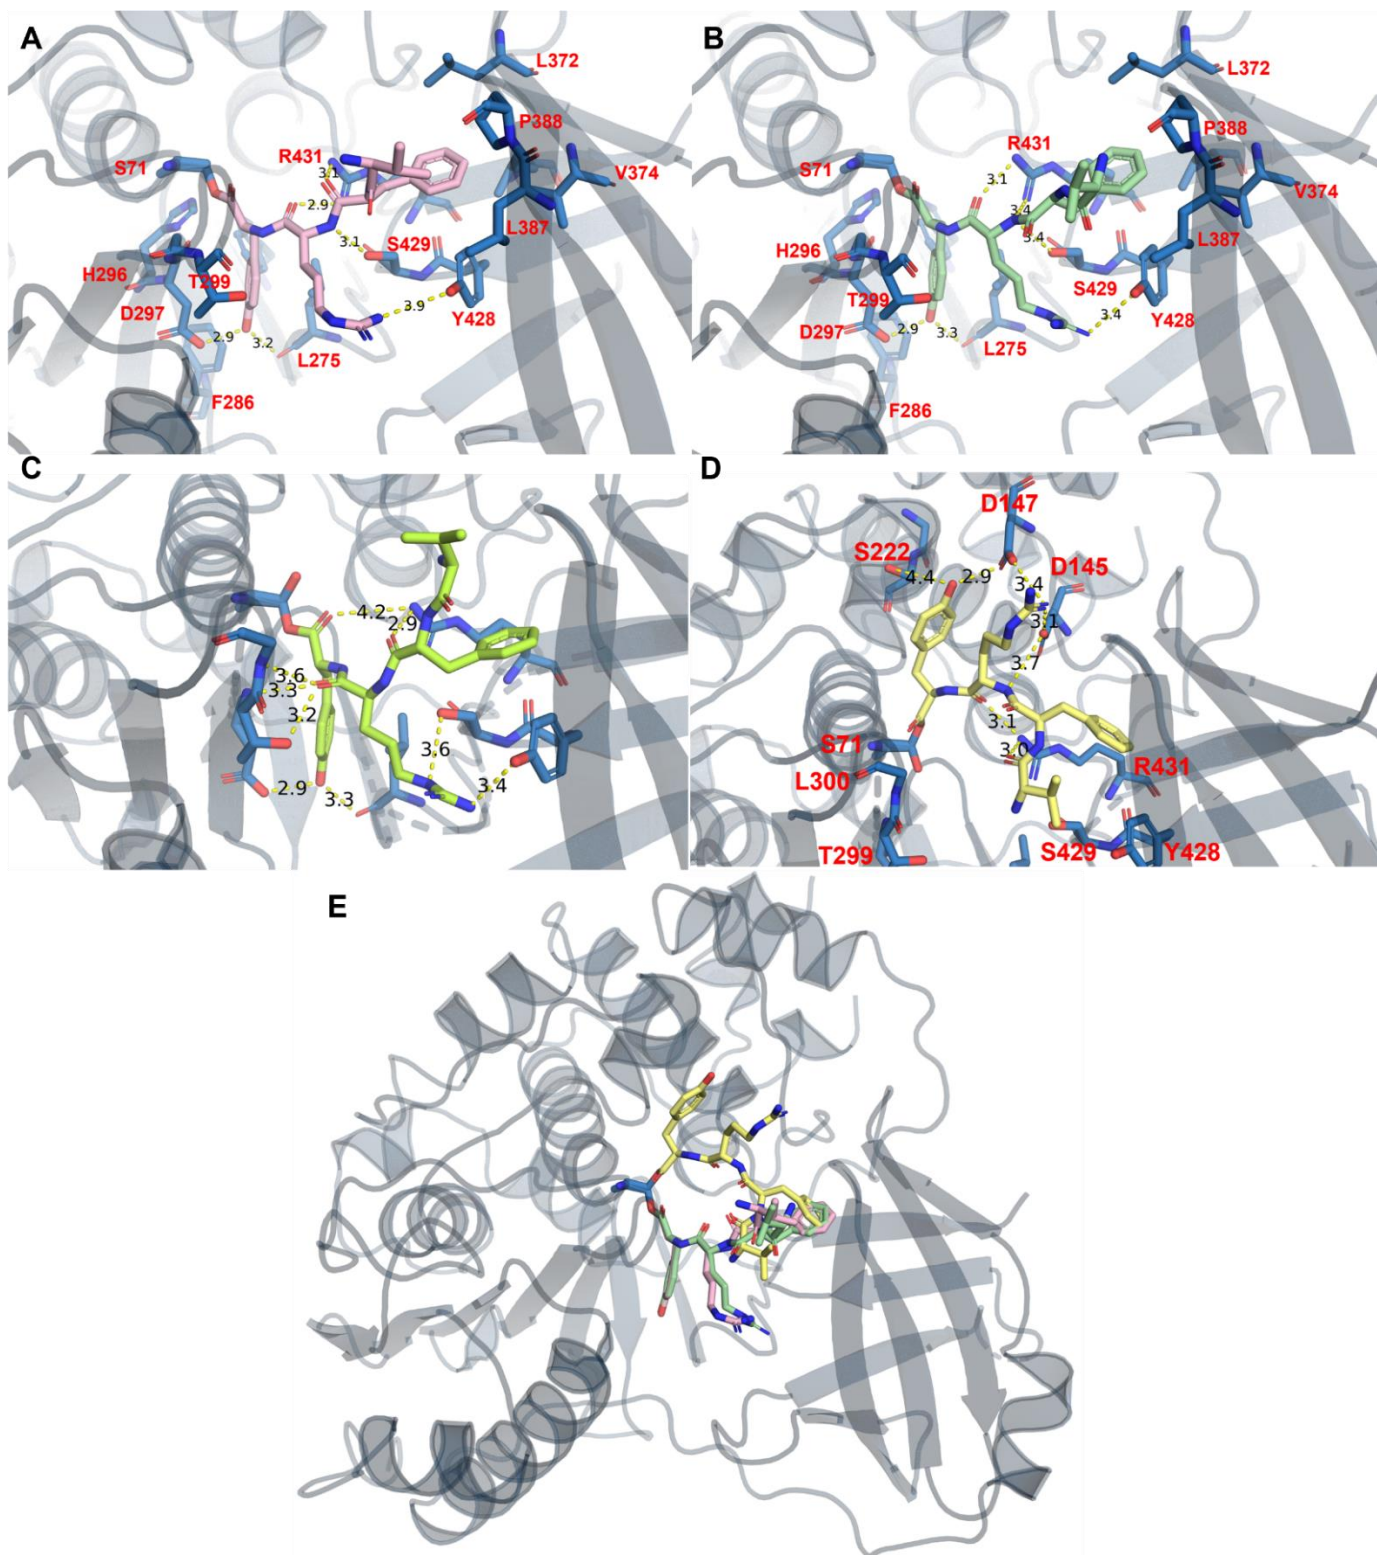

**Supplementary Fig. 41: Covalent docking of tetrapeptides to the Ulm16 crystal structure.** (A-D) Representative poses of peptide **29** (pink, A), peptide **16** (dark green, B), and peptide **30** (dark green or yellow, C-D) docked to Ulm16. Hydrogen bonding residues are labeled and shown in stick representation, while lipocalin domain residues involved in possible hydrophobic interactions are also displayed as sticks. Panels (A) and (B) show the lowest MMGBSA and dock score poses for peptides **29** and **16**, respectively. Panels (C) and (D) show the lowest dock score and MMGBSA score poses for peptide **30**, respectively. (E) Overlay of the lowest MMGBSA scoring poses for peptides **16**, **29**, and **30** in the Ulm16 active site, highlighting the different initial orientation of peptide **30**.

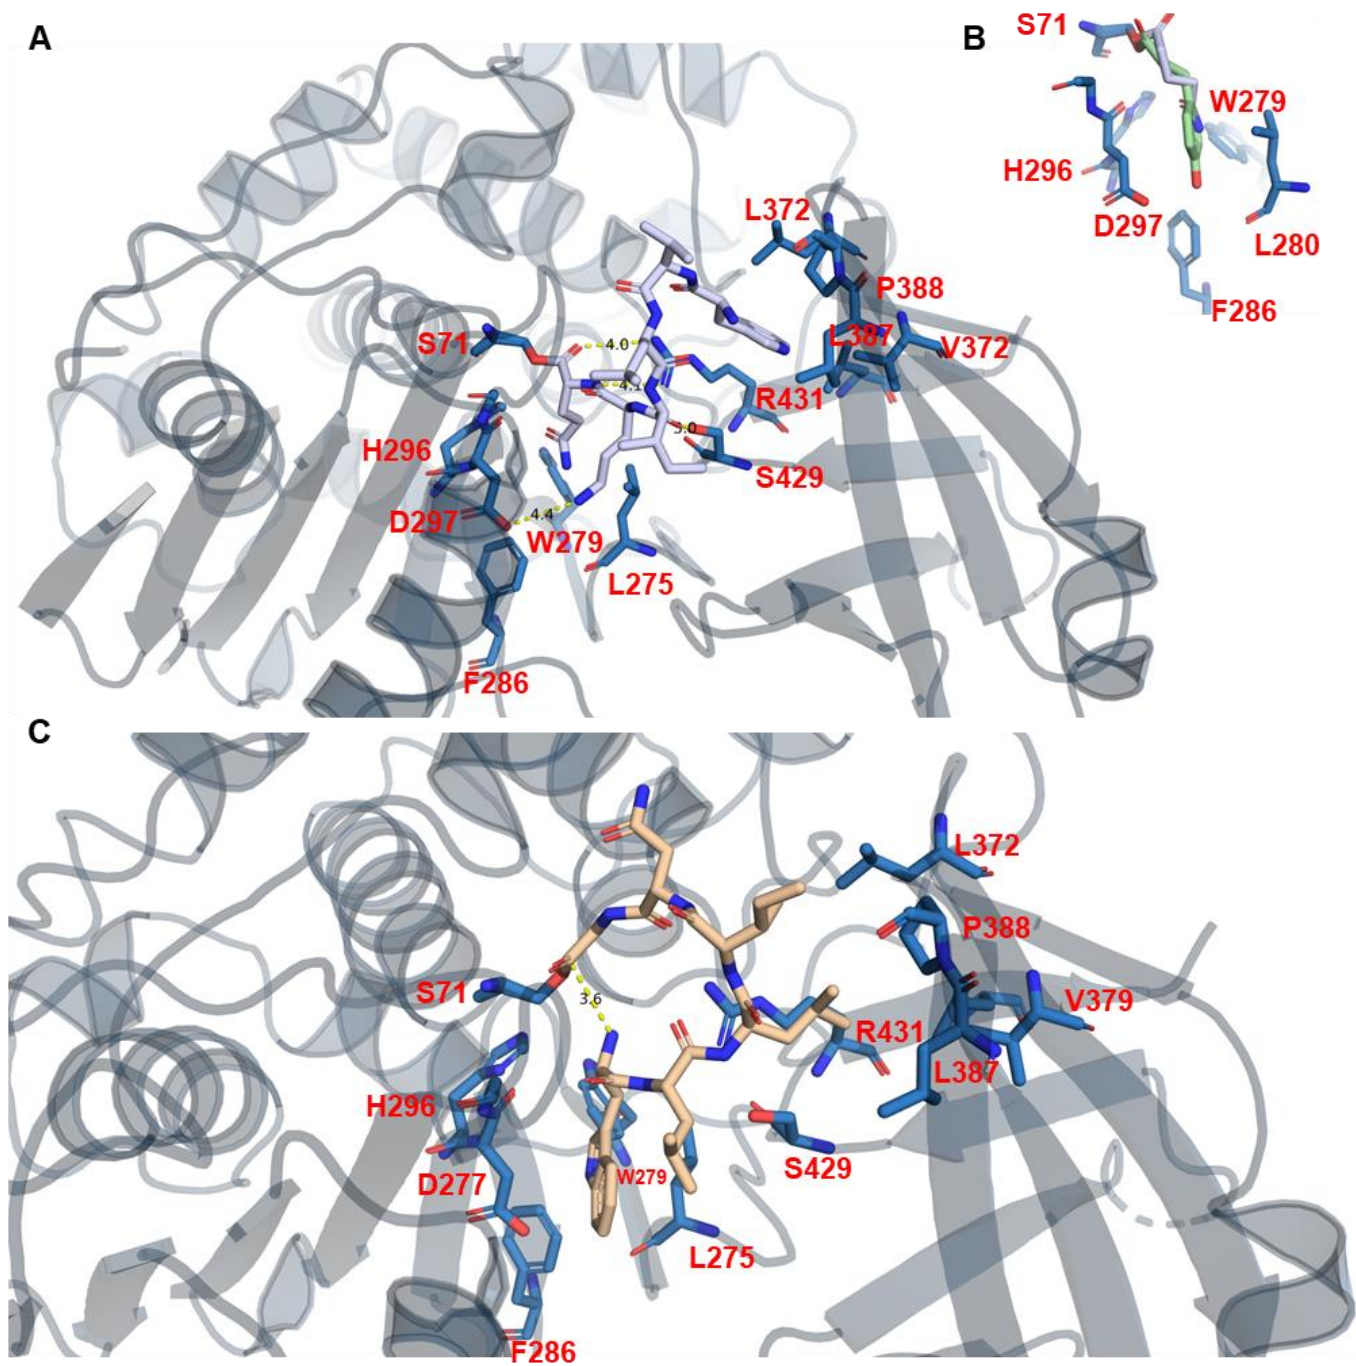

**Supplementary Fig. 42: Covalent docking of hexapeptides to the Ulm16 crystal structure.** (A-C) Representative poses of peptide 1 (light blue) and peptide 11 (tan) covalently docked to Ulm16. Hydrogen bonding residues are labeled and shown in stick representation, while lipocalin domain residues involved in possible hydrophobic interactions are also displayed as sticks. Panels (A) and (C) show the lowest MMGBSA and dock score poses for Peptides 1 and 2, respectively. Panel (B) shows the C-terminal D-Gln of the Ulm16 peptide overlaid with the C-terminal D-Tyrosine of peptide 16.



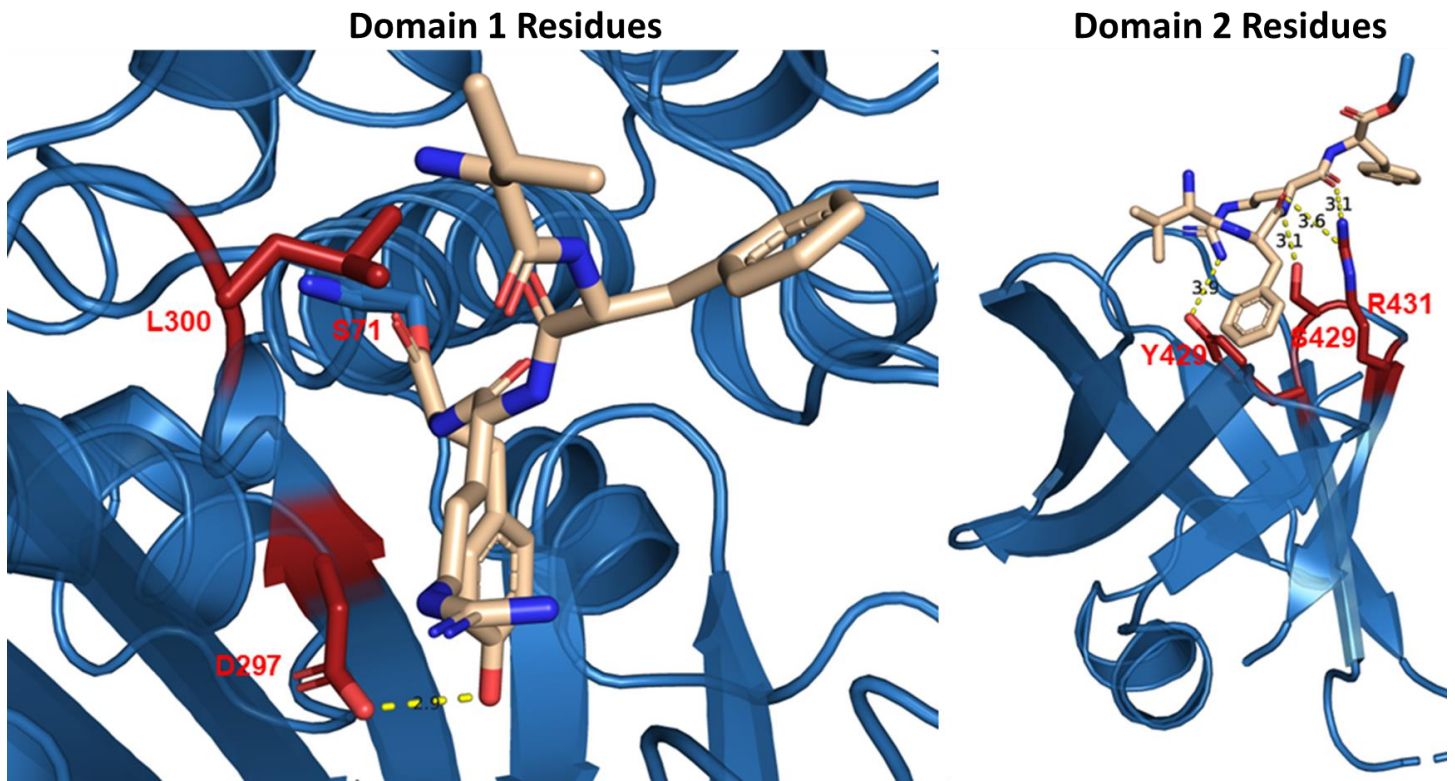

**Supplementary Fig. 43: Residues mutated in SDM studies** **A)** Close-up of mutated residues (L300 and D297) within Domain 1, highlighting their proximity and interactions with the covalently docked peptide 29. **B)** Close-up of mutated residues (Y428, S429, and R431) located in Domain 2, highlighting their proximity and interactions with the covalently docked peptide 29

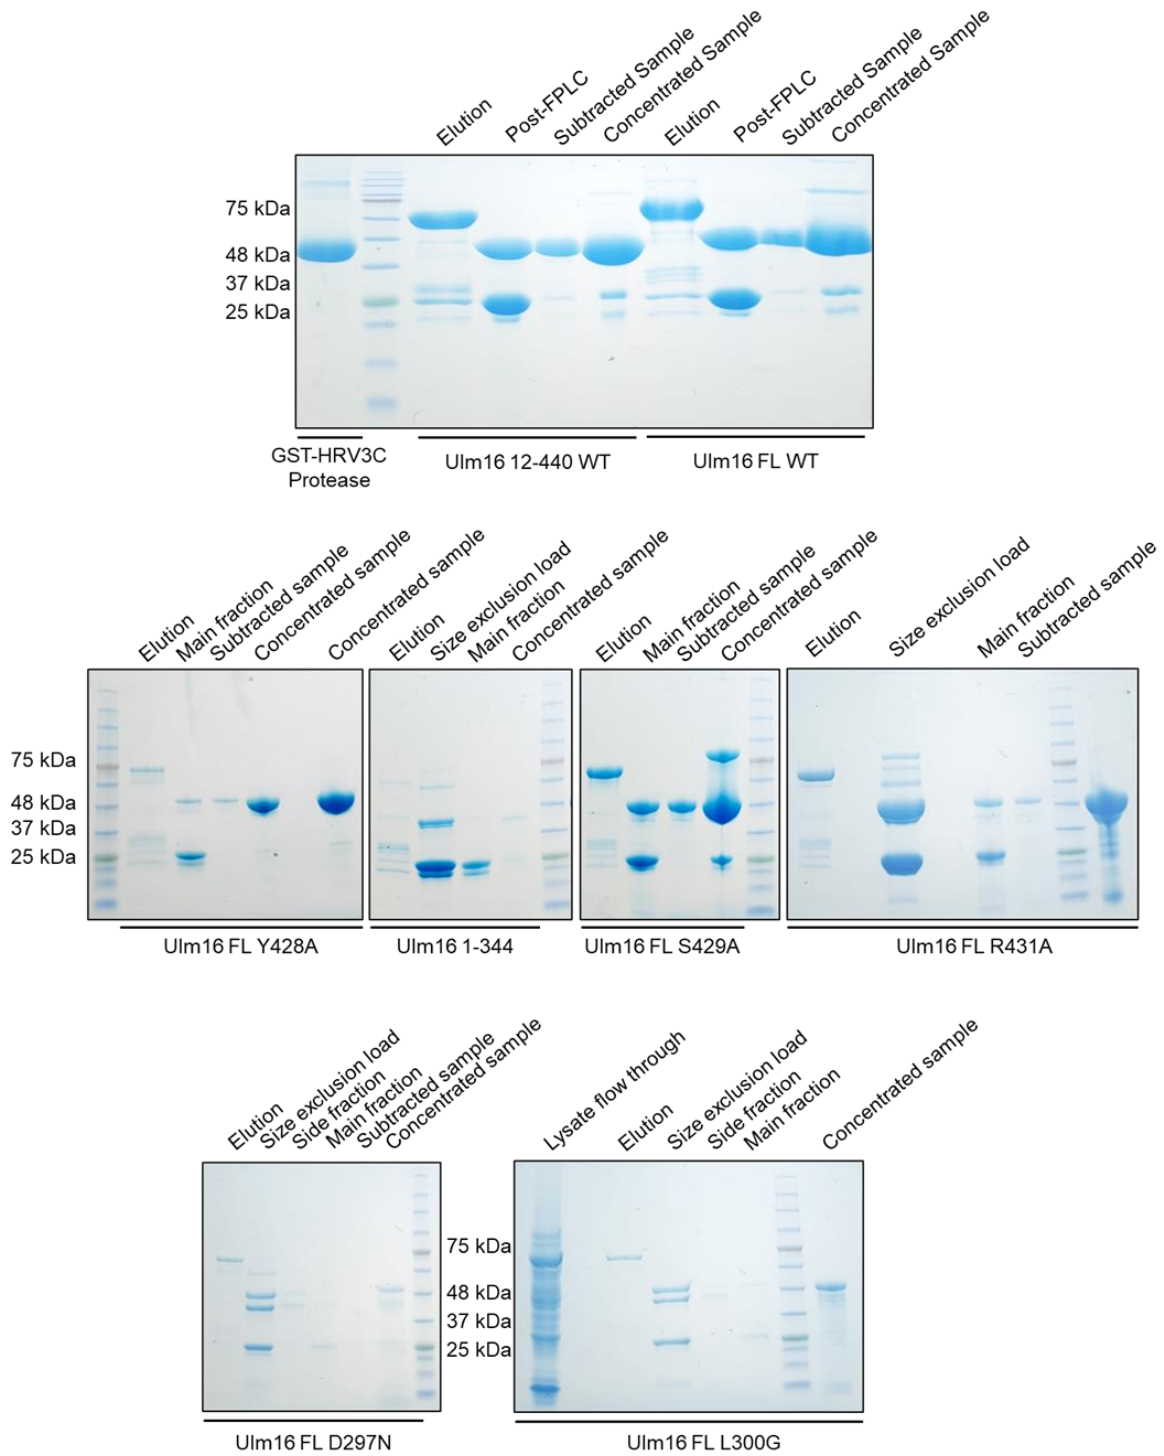

**Supplementary Fig. 44. Purification gels for GST tagged Ulm16 FL, Ulm16 FL mutants, and Ulm16 12-440.** Purification gels as described in the following: HRV3C protease used to cleave GST-Ulm16 WT to GST and Ulm16 WT individually along with the purification of Ulm16 12-440 and FL constructs (top); Ulm16 FL mutants Y428A, 1-344, S429, R431A (middle); and Ulm16 D297N, L300G (bottom). The fusion protein appears in the lysate elution at ~70 kDa and is cleaved by the HRV3C protease into fragments of Ulm16 (~45 kDa) and GST (two bands that appear near the 25 kDa marker). Tag subtraction and concentration lead to highly pure samples that are then used for assays.

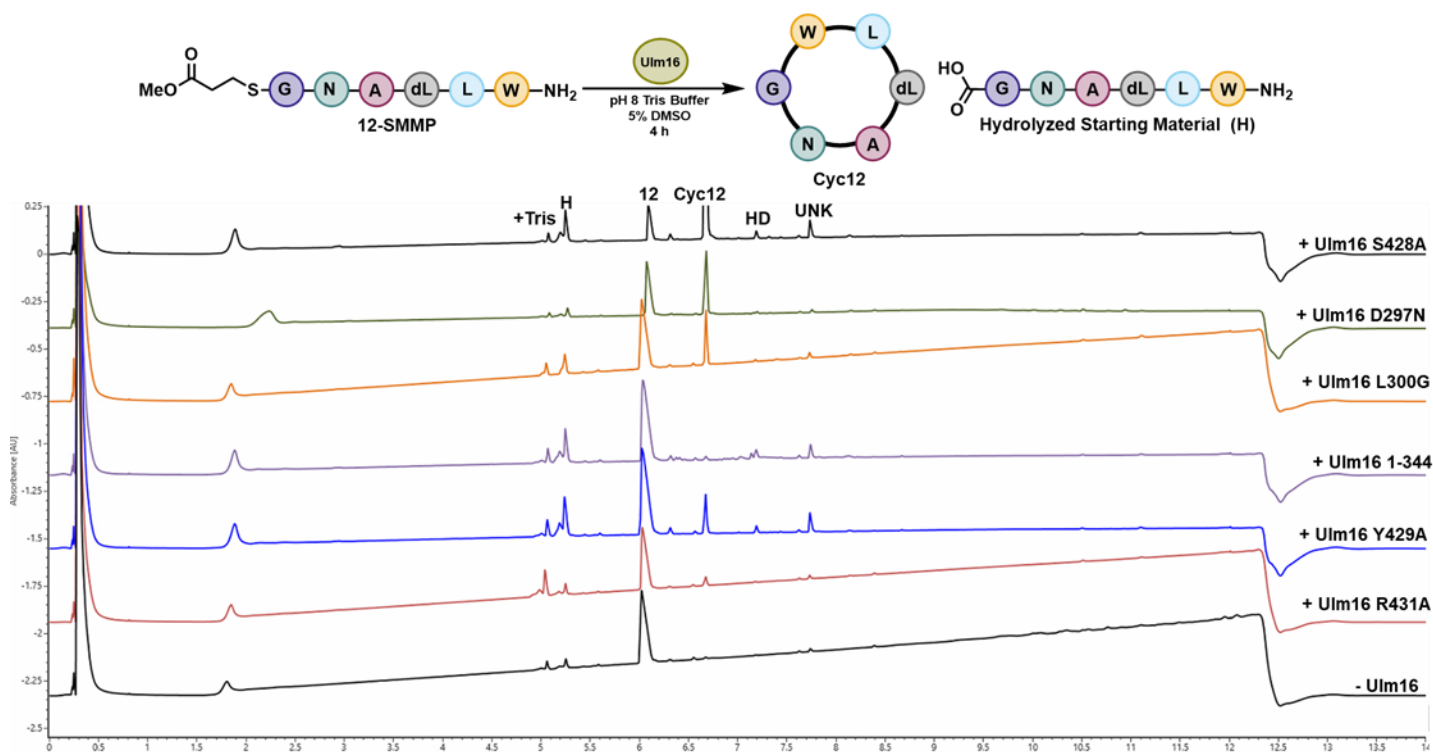

**Supplementary Fig. 45.** UPLC UV trace (214 nm) is shown for the total turnover number (TTN) assay of Ulm16 mutant reactions with peptide 12-MMP. The enzyme and substrate concentrations can be found in Supplementary Table 2. Each UPLC trace is labeled with the Ulm16 Mutant tested. The substrates are labeled with their corresponding numbers from the paper, while 'Cyc' and 'H' represent head-to-tail cyclic and hydrolyzed linear compounds, respectively. Other side reactions included dimerization followed by hydrolysis (HD) and addition of Tris to the C-terminus of the peptide (+Tris) The UPLC trace is representative of three individual replicates.

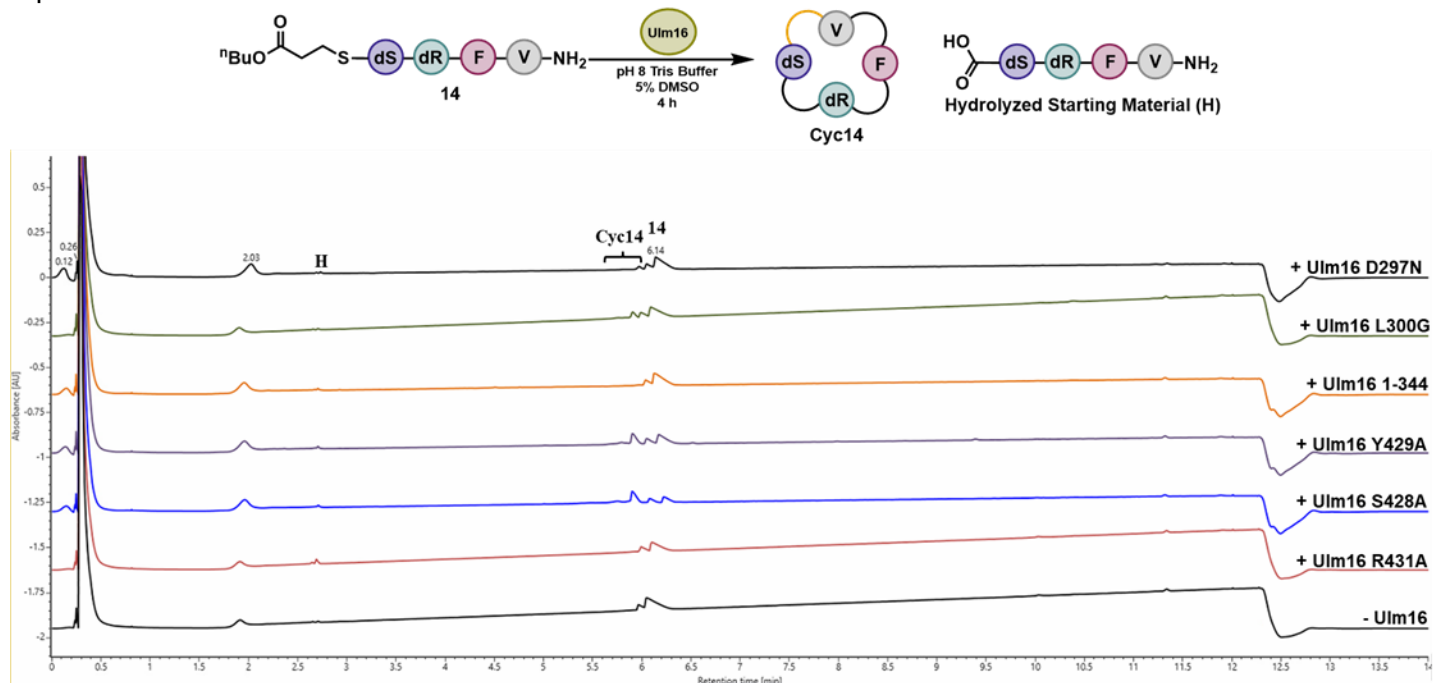

**Supplementary Fig. 46.** UPLC UV trace (214 nm) is shown for the total turnover number (TTN) assay of Ulm16 mutant reactions with peptide 14. The enzyme and substrate concentrations can be found in

Supplementary Table 2. Each UPLC trace is labeled with the Ulm16 Mutant tested. The substrates are labeled with their corresponding numbers from the paper, while 'Cyc' and 'H' represent head-to-tail cyclic and hydrolyzed linear compounds, respectively.

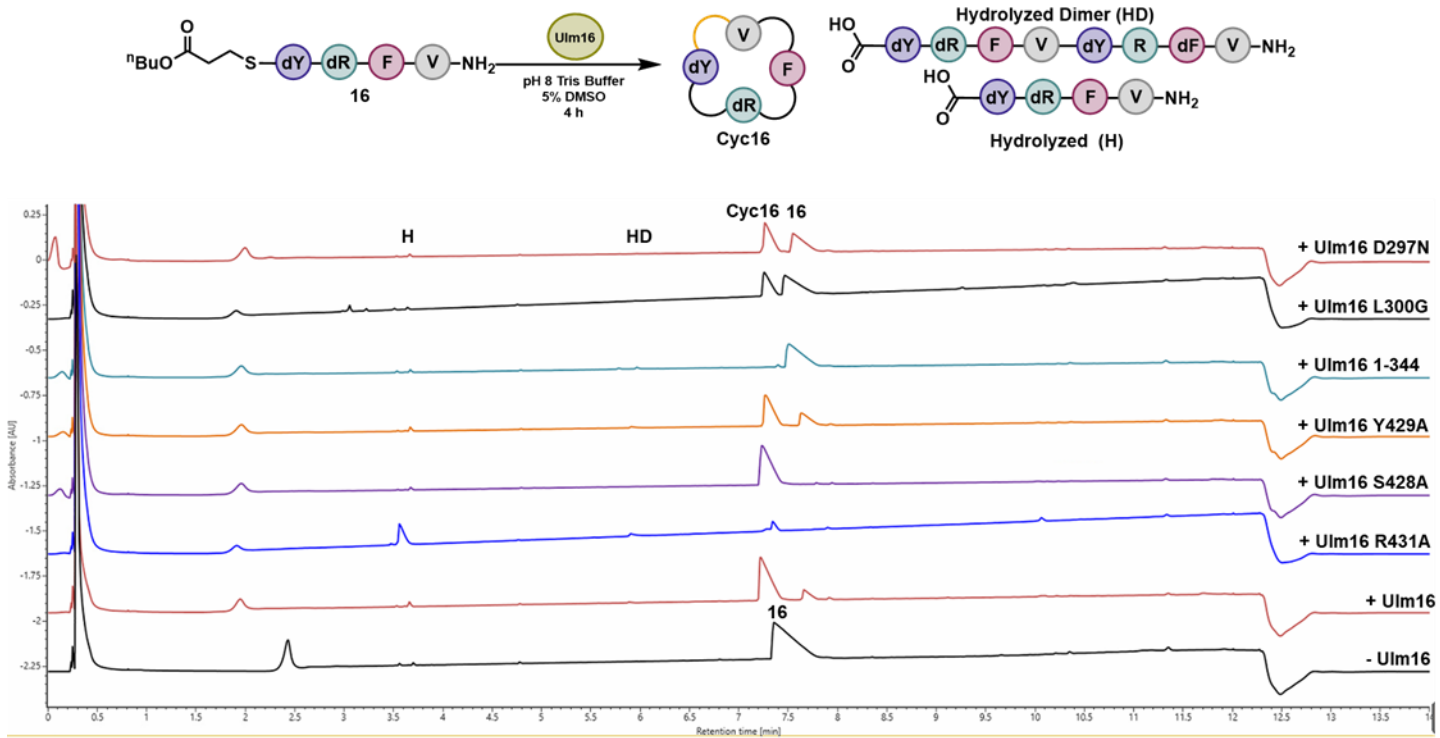

**Supplementary Fig. 47. UPLC UV trace (214 nm) is shown for the total turnover number (TTN) assay of Ulm16 mutant reactions with peptide 16.** The enzyme and substrate concentrations can be found in Supplementary Table 2. Each UPLC trace is labeled with the Ulm16 Mutant tested. The substrates are labeled with their corresponding numbers from the paper, while 'Cyc' and 'H' represent head-to-tail cyclic and hydrolyzed linear compounds, respectively. Other side reactions included dimerization followed by hydrolysis (HD). The UPLC trace is representative of three individual replicates.

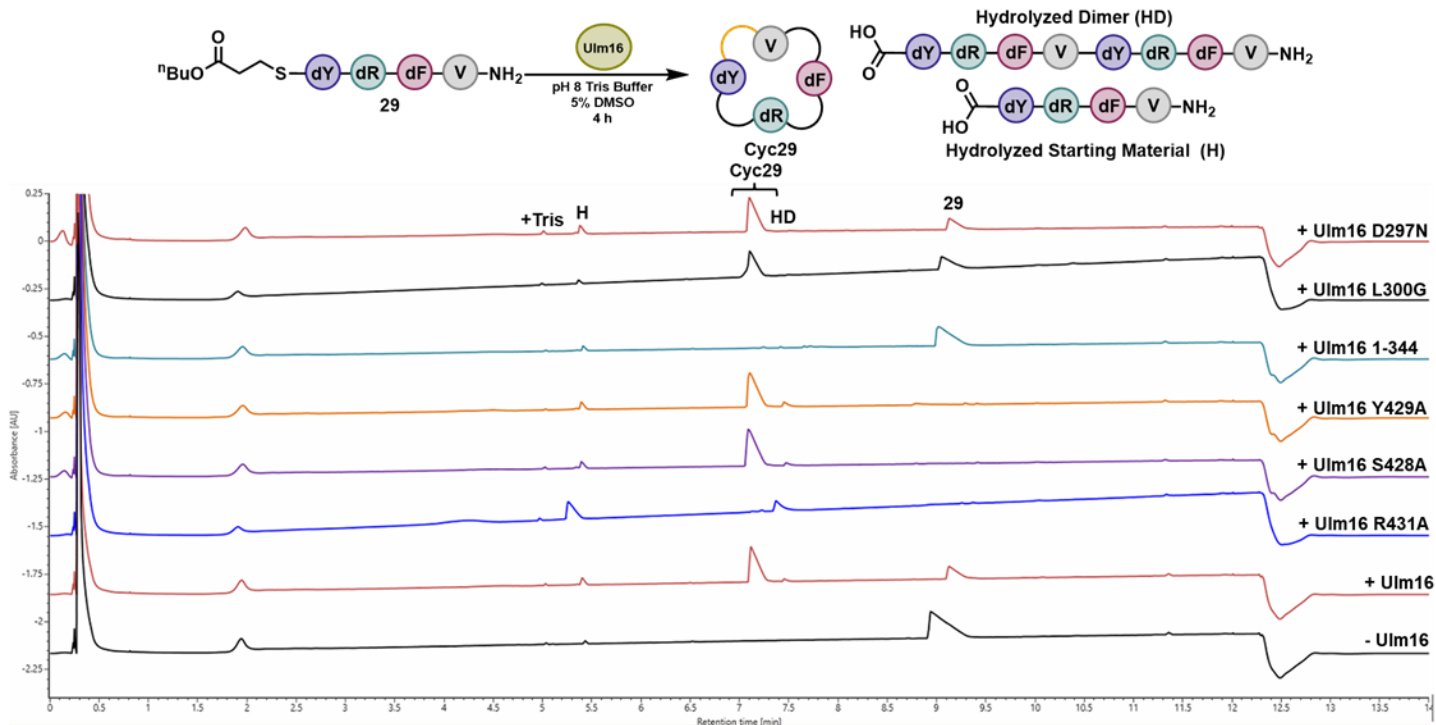

**Supplementary Fig. 48. UPLC UV trace (214 nm) is shown for the total turnover number (TTN) assay of Ulm16 mutant reactions with peptide 29.** The enzyme and substrate concentrations can be found in Supplementary Table 2. Each UPLC trace is labeled with the Ulm16 Mutant tested. The substrates are labeled with their corresponding numbers from the paper, while 'Cyc' and 'H' represent head-to-tail cyclic and hydrolyzed linear compounds, respectively. Other side reactions included dimerization followed by hydrolysis (HD) and addition of Tris to the C-terminus of the peptide (+Tris). The UPLC trace is representative of three individual replicates.

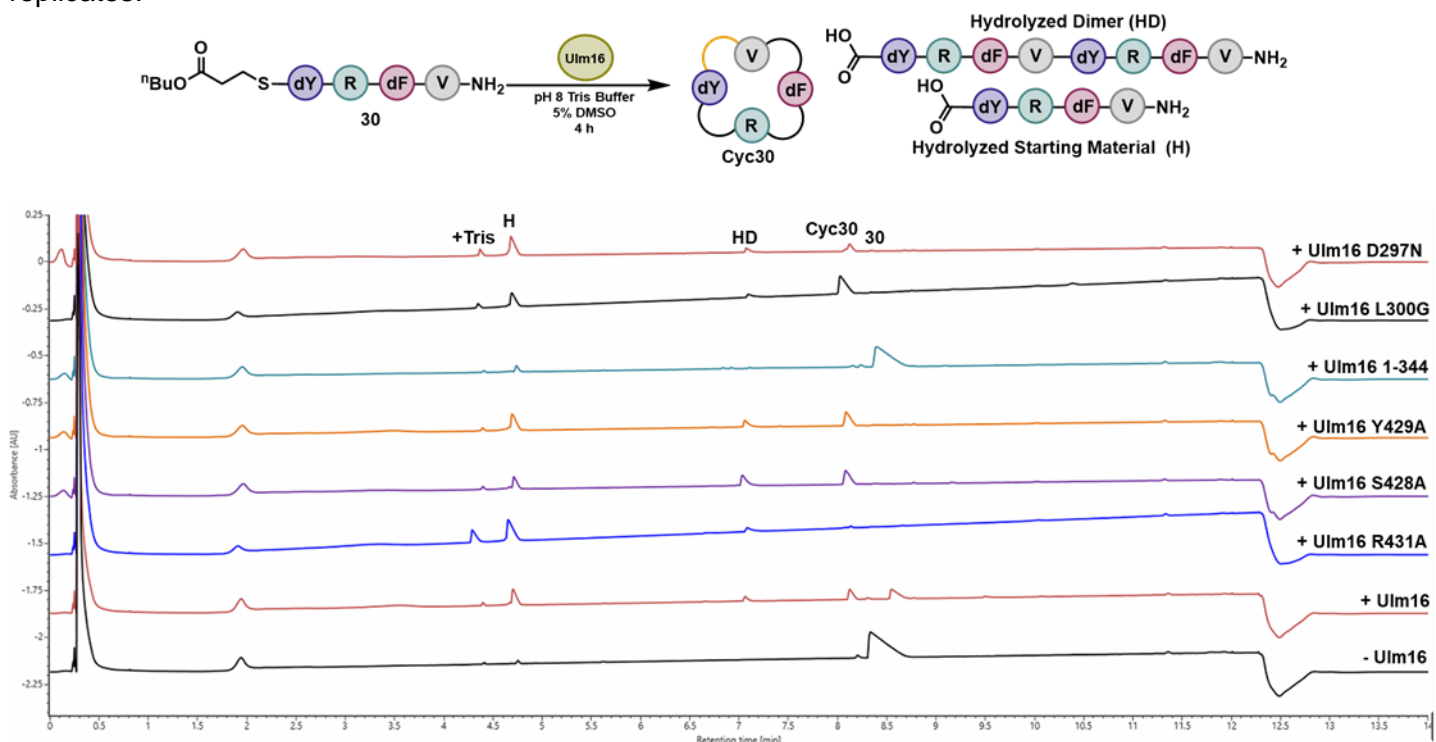

**Supplementary Fig. 49. UPLC UV trace (214 nm) is shown for the total turnover number (TTN) assay of Ulm16 mutant reactions with peptide 30.** The enzyme and substrate concentrations can be found in

Supplementary Table 2. Each UPLC trace is labeled with the Ulm16 Mutant tested. The substrates are labeled with their corresponding numbers from the paper, while 'Cyc' and 'H' represent head-to-tail cyclic and hydrolyzed linear compounds, respectively. Other side reactions included dimerization followed by hydrolysis (HD) and addition of Tris to the C-terminus of the peptide (+Tris) The UPLC trace is representative of three individual replicates.

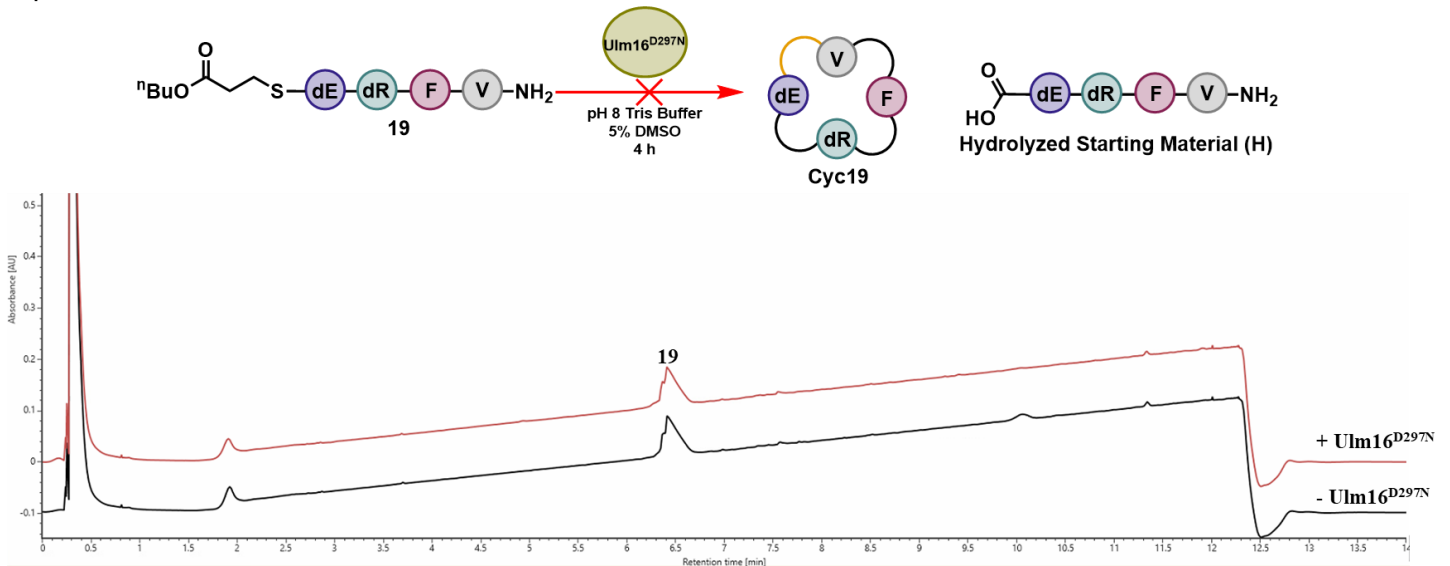

**Supplementary Fig. 50. UPLC UV trace (214 nm) is shown for the total turnover number (TTN) assay of Ulm16<sup>D297N</sup> mutant reaction with peptide 19.** A concentration of 70 nM Ulm16 and 280  $\mu$ M of substrate was used however like with the wild type reaction no cyclic peptide or hydrolyzed peptide was observed. The UPLC trace is representative of three individual replicates.

**Supplementary note 1: Gene sequence for Ulm16**

ATGCACGGGGACTATGCGGATCCAGCGGATTGCGGCGCCGGTGACGGCGCCCCGTGGCCTCGACCT  
GGACCGCCTCGCCCGTGACTGCGACGTCGTCGGCGGGCAGCTGGCCCTCCATACCAAGGCACCCTGA  
CCACCTGGGAGTTCGGCACCGAGGAGCACGCCGGCGGGCGTCCGGTACACGTCCGGGTCGGCGTTCCC  
GTACGGGTCCGGTACCAAGGCGTTACCCGCCACCGCCGTTCTGCAACTGGCCGGTGACGGGGACCTGG  
ACCTCGACCGACCGGTACGGGAACTGCTCCCCGAGGCCGAGGCCGAGGCCGAGATCGAGGTTCGAGGCA  
GGGTCCGGGACCGGTGCGCGCGCGGACGGCGGCCACCCGGCCCTCGCCGCCACCCTCCGCCAACTCC  
TCAGCCACACCGCCGACTCCCGTCCGACCACGACGACGAGCGCGCCCCCTCGCTGCGCCGCTGGCTC  
ACCGGCTTCCTGGCACTGCCGGTCCGGCCCTGGCCCGCACCCGGCTCCTTCTCCTACTCCAACGTCCGGC  
TACGGCATCGCGGGCCGCGTCGTGGAGGCCGTCACCGGACTGACCTGGTCCGAGGCCGTACGGGACTT  
CCTGCTGCACCCGCTGGGCACCGCCATCACCGTGCTGCCACCGACCCCGGCTCGCTGCCCGCGGGCG  
GTCTCGCGGGCAGCGCCGCGACCTGGTACGGCTGGGCCGGCTGCATCTGGACGAGCCCGGTGACCC  
GGACCTGGCCCGCCTCGCCGACCCGGACGCCCTGCGGGAGATGGCCCGGCCACCGCCGGCGCCGAC  
CCCTTCGGGCTGGCGGACGGCTGGGGACCGGGCCTGGGCCGGTTCGGCCCCGCCGGCAACCGCTGGC  
TCGGCCACGACGGCACCCCTGGACGGCGCCACCTGCCATCTGCGCATCCACCCGGGCGCGGCACCGTC  
GTCGCGCTGACCACCAACTCCCCGACCGGGCAGGCCCTGTGGGACGCCGTGGTTCGACGCACTGCGGGA  
CGCGGACATCGACGTCGGCGTCCACCGCCCCGCGCCCCCGCCTGCCATCGCCGCGGGCGGCCTTCGCG  
GACTGTACGGGTACCTACCGCAACGGCGACCTGGCGGTGACGGTCGGCATCGACGGCCCGTACCTCGT  
ACTTGAACCTCCCCGGCGGGCGCACGGGAGTTGGCGCAGCCACTGGCTACCGGACGTTCTCCTCGCGGG  
GGGCCGGCTTCCTCGGGCGCTTTGTACCGACGCGCGCTCCGACGCCGTCCACGCCCTCCAGTACAGC  
GGACGCACCCTCCTGCGGGAAGCGGGAGAGTCCCGCCGCGCACGGTCCGCACTGA

**Supplementary note 2: Gene sequence for SurE**

ATGGGTGCCGAGGGGGCGGAACGGGACGCGGTTCGGCGCGCTCTTCGAGGAGCTGGTGC GCGAGCACC  
GGGTCACCGGGGGCGCAGCTGGCCGTCTACCGCGACGGCGCCCTCAGCGAGTACGCCACCGGCCTCGC  
CTCGGTCCGCACCGGTGAACCGGTCACCCCCCGACGGGTTTCCCCTTCGGCTCGGTGACCAAGTTCT  
CACCGCCGAGCTGGTCATGCAGTTCGTCTGCGACGGCGACCTGGACCTCGACGACCCCTCGCCGGGC  
TCCTCCCCGACCTGGGGCGCGCCGCGGCCCGGCCCTCGGCACCGCCACCGTCCGCCAGCTCCTCAG  
CCACACCGCCGGCGTGGTGGACAGCATCGAGTACGACGAGATGCGCGGTCCCTCCTACCGGCGGTTTCG  
CCGCGACGTGCGCCCGGCAGCCCGCGCTCTTCCCGCCGGGCCTCGCCTTCTCCTACTCCAACACCGGC  
TACTGCCTGCTGGGCGCGGTGATCGAGGCGGCGTTCGGGGATGGACTGGTGGACGGCGATGGACAGTTG  
CCTGCTGCGTCCGCTCGGCATCGAGCCGGCCTTCTGACGACCCCGCGCCCCGGCCAGGGCGGGCGCC  
GCCCCGGCCGGTGGCCGAAGGCCACGCGCTGCGCGCCGGCGGGCGAGCGGGCCGAGCGCGTCGACCAC  
ATGGCCTCGCTCTCGCTGGCCGCCGCGGGCGGGTGGTTCGGCAGCGCCACCGACCTGGTCACCGCGG  
CCCGCCCGCACCTGGCCGACCGGAAGACCTTCGCCCAGCACGACCTGCTCCCCGAGGACGCCGTCTC  
GCCATGCGCACCTGCGTGCCGGACGCCGAGCCGTTTCGGCCTGGCCGACGGCTGGGGGCTGGGCCTGA  
TGCGCCACGGCACCGGCGACGGCGCCTGGTACGGCCACGACGGCGCGGTGGGCGGGCGCCTCCTGCAA  
CCTCCGTATCCACCCGGACCGTTCGCTGGCGCTGGCGCTGACCGCCAACCTCCACCGCCGGGCCGAAGC  
TGTGGGAGGCGCTGGTTCGCGCGGCTGCCGGAGGCCGGGCTCGACGTGGGCCACTACGCGCTGCCCGT  
CCCCGACTCCGCGCCGCTGGCCCCGACGTCGGCCACCTCGGCACCTACGCCAACGGCGACCTGGAGC  
TGATGGTGACCCACGATGCCGCCGGCGACCTCTTCTGACCCGCGAGAGCTACTCCGACTACCGCCTCT  
CCCTGCACGAGGACGACCTCTTCGTGGCCCCGGAGCGGCGAGCCCGGCGCGCTCCCGATACCGGCCG  
CTTCGTCCGGGAGCACCCGGCCGGGCCGGTTCGCCCTGCTCCAGTACGGCGGGCCGGGCCATGCACCGG  
CTCTGA

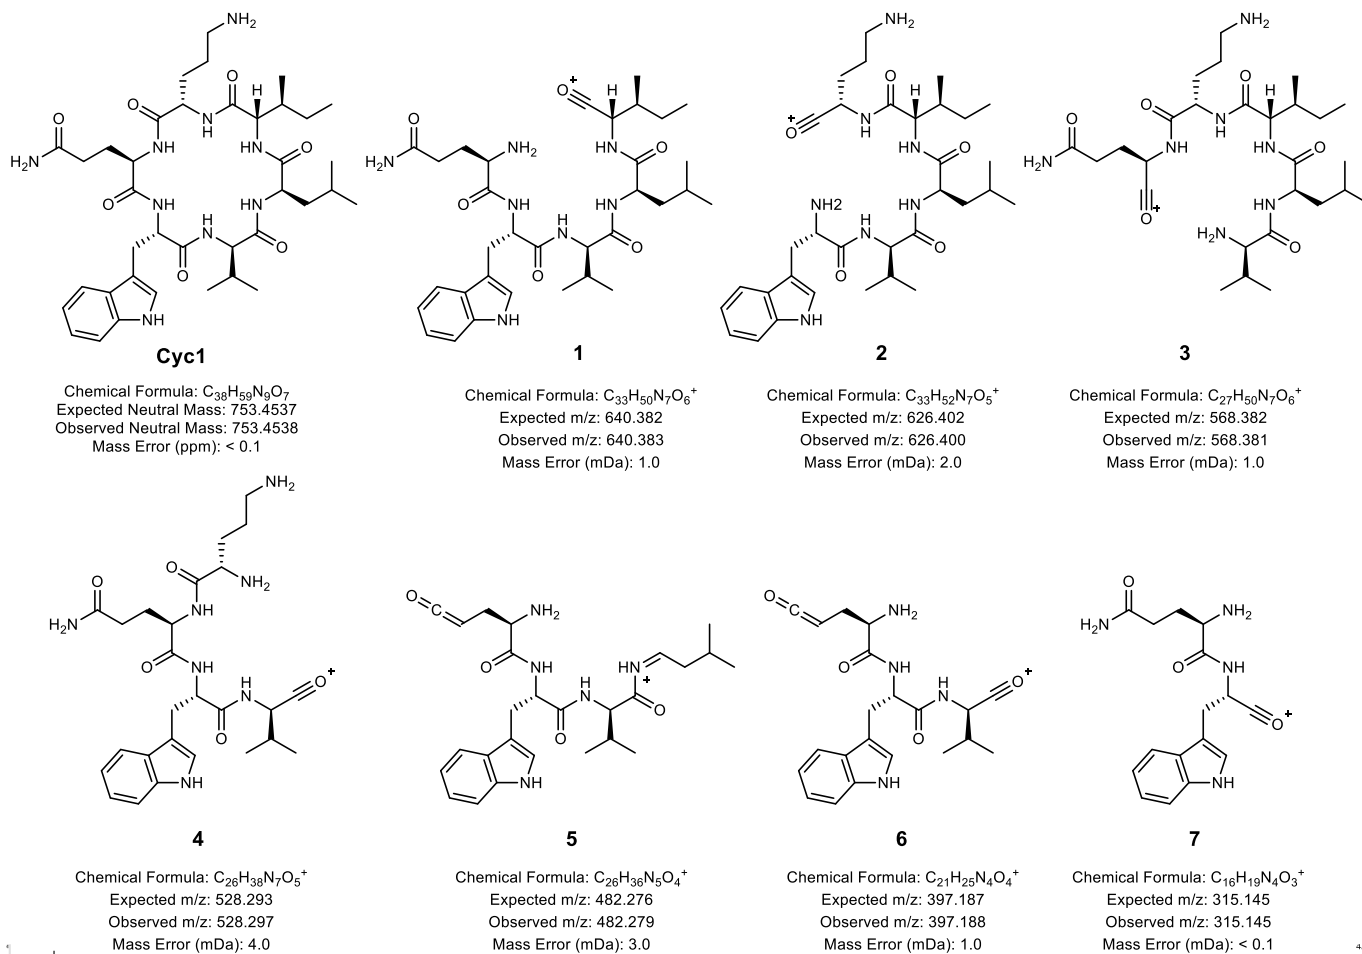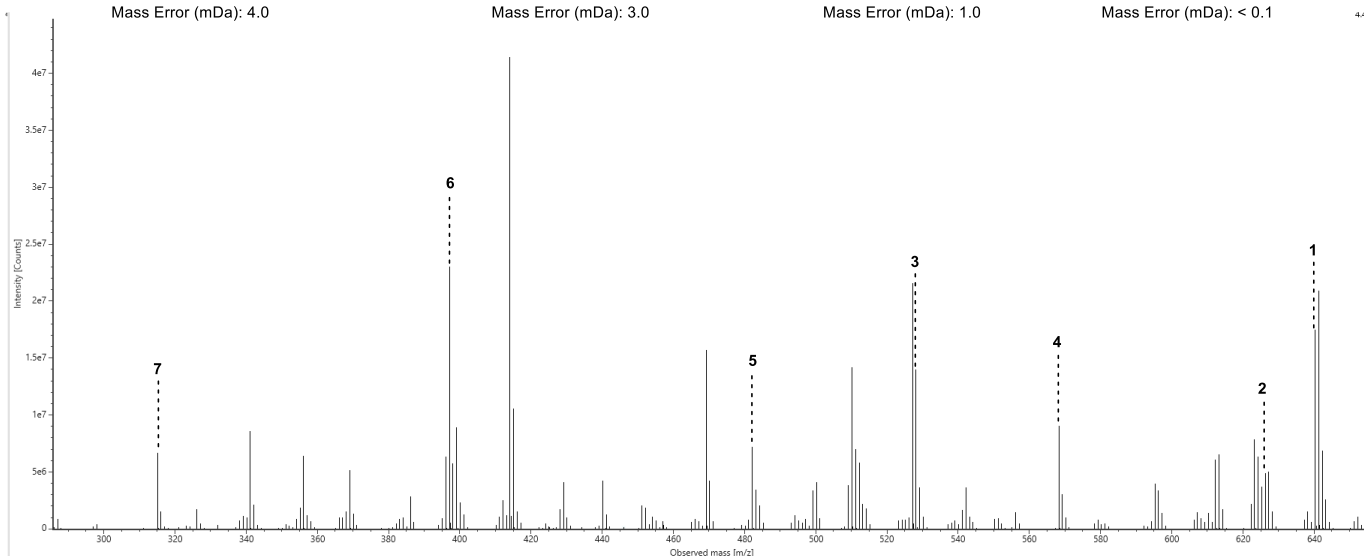

**MS/MS Spectra of Cyclic Peptides Identified in this Study**  
**Supplementary Fig. 51: MS2 spectrum for Cyclic peptide 1 (Cyc1)**





## Supplementary Fig. 52: MS2 spectrum for Cyclic peptide 5 (Cyc5)

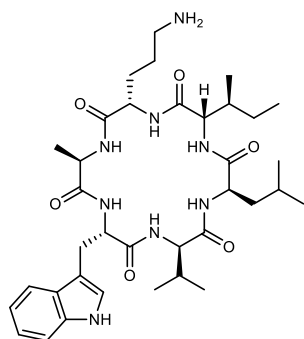

Chemical Formula:  $C_{36}H_{56}N_9O_8$   
 Expected Neutral Mass: 696.4322  
 Observed Neutral Mass: 696.4322  
 Mass Error (ppm): < 0.1

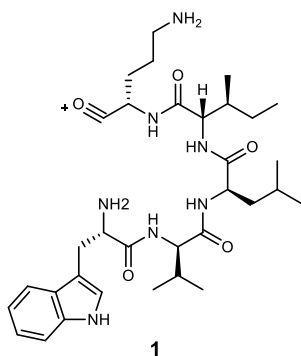

Chemical Formula:  $C_{33}H_{52}N_7O_5^+$   
 Expected m/z: 626.402  
 Observed m/z: 626.403  
 Mass Error (mDa): 1.0

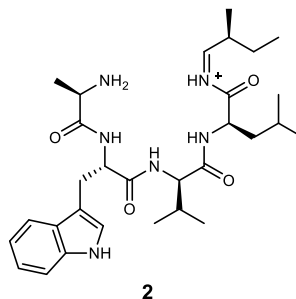

Chemical Formula:  $C_{30}H_{47}N_6O_4^+$   
 Expected m/z: 555.365  
 Observed m/z: 555.367  
 Mass Error (mDa): 2.0

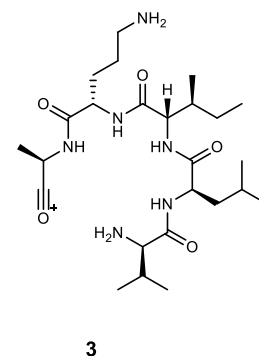

Chemical Formula:  $C_{25}H_{47}N_5O_5^+$   
 Expected m/z: 511.360  
 Observed m/z: 511.359  
 Mass Error (mDa): 1.0

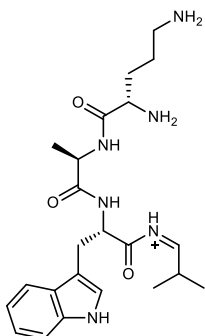

Chemical Formula:  $C_{23}H_{35}N_6O_3^+$   
 Expected m/z: 443.277  
 Observed m/z: 443.278  
 Mass Error (mDa): 1.0

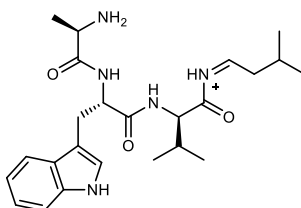

Chemical Formula:  $C_{24}H_{36}N_5O_3^+$   
 Expected m/z: 442.281  
 Observed m/z: 442.283  
 Mass Error (mDa): 2.0

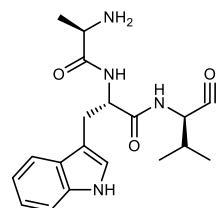

Chemical Formula:  $C_{19}H_{25}N_4O_3^+$   
 Expected m/z: 357.192  
 Observed m/z: 357.192  
 Mass Error (mDa): < 1.0

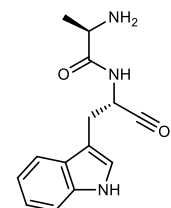

Chemical Formula:  $C_{14}H_{16}N_3O_2^+$   
 Expected m/z: 258.124  
 Observed m/z: 258.126  
 Mass Error (mDa): 1.0

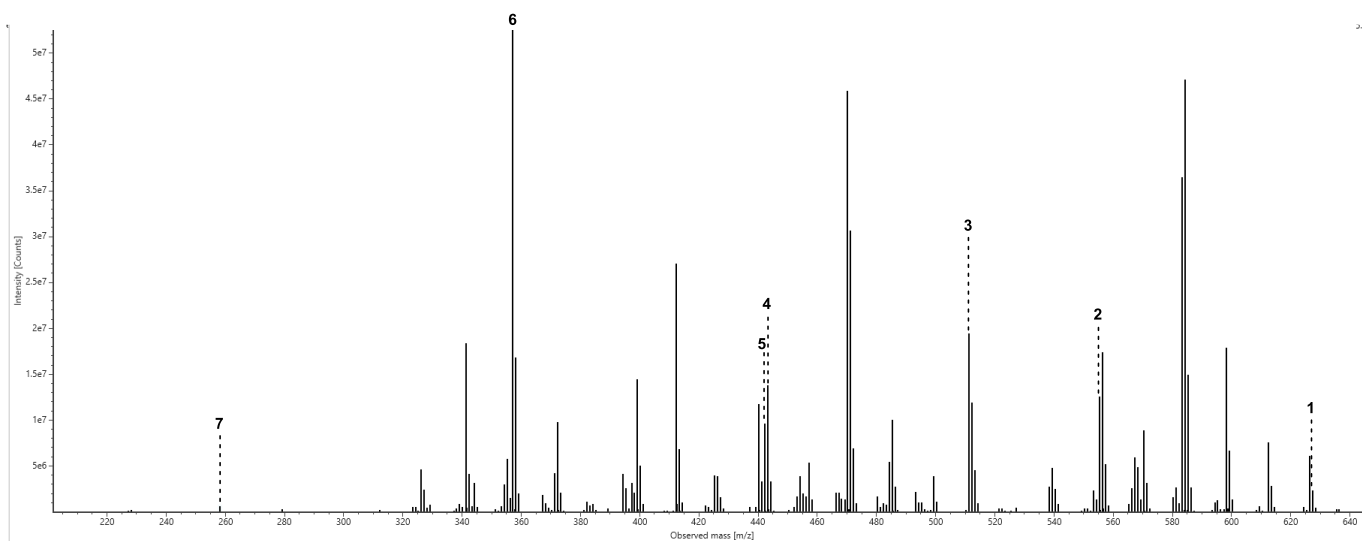

## Supplementary Fig. 53: MS2 spectrum for Cyclic Peptide 6 (Cyc 6)

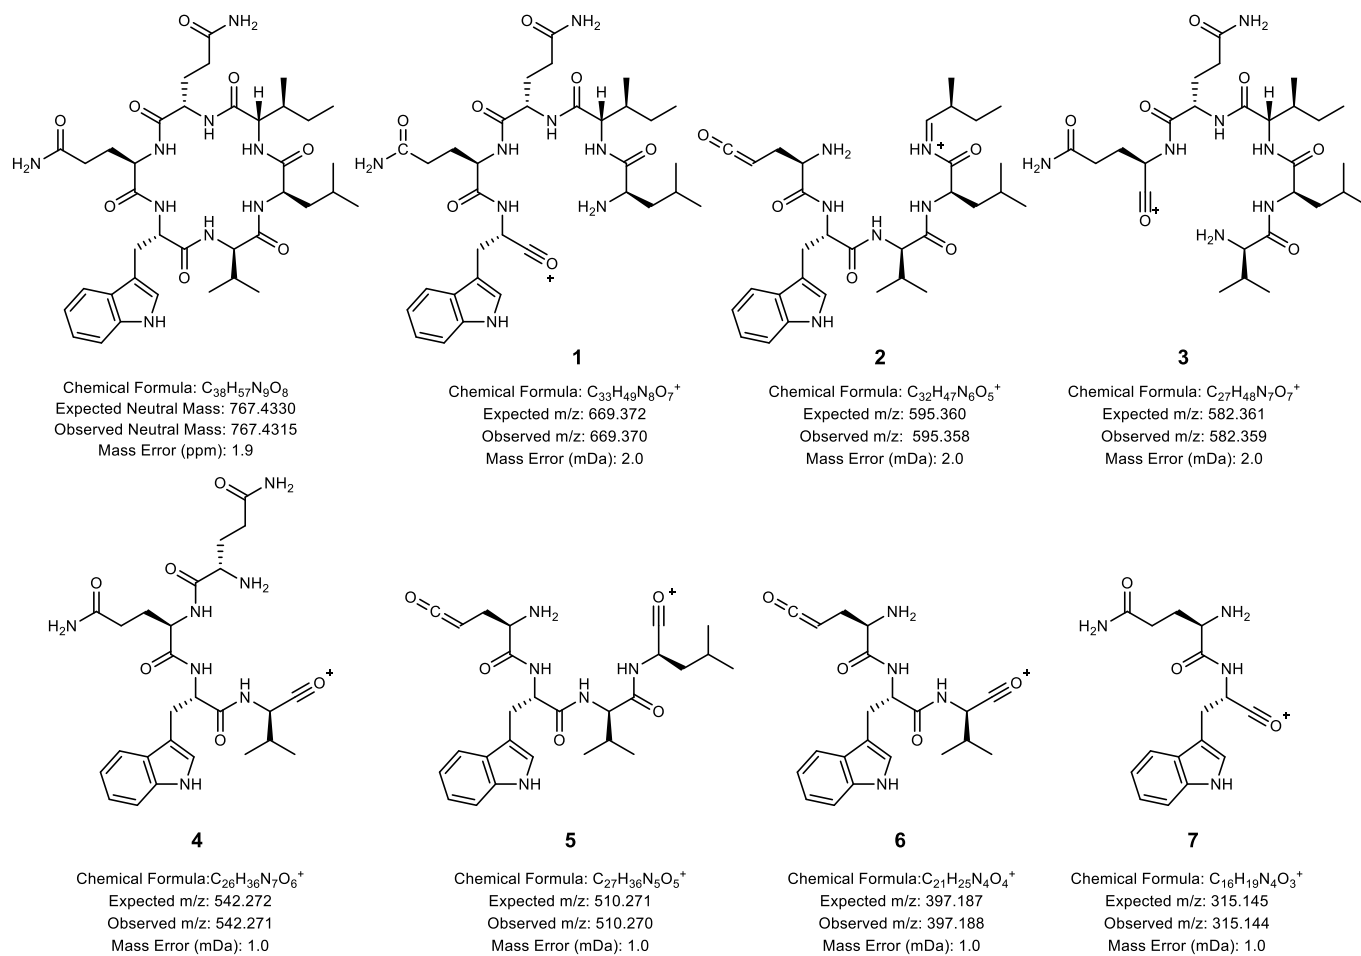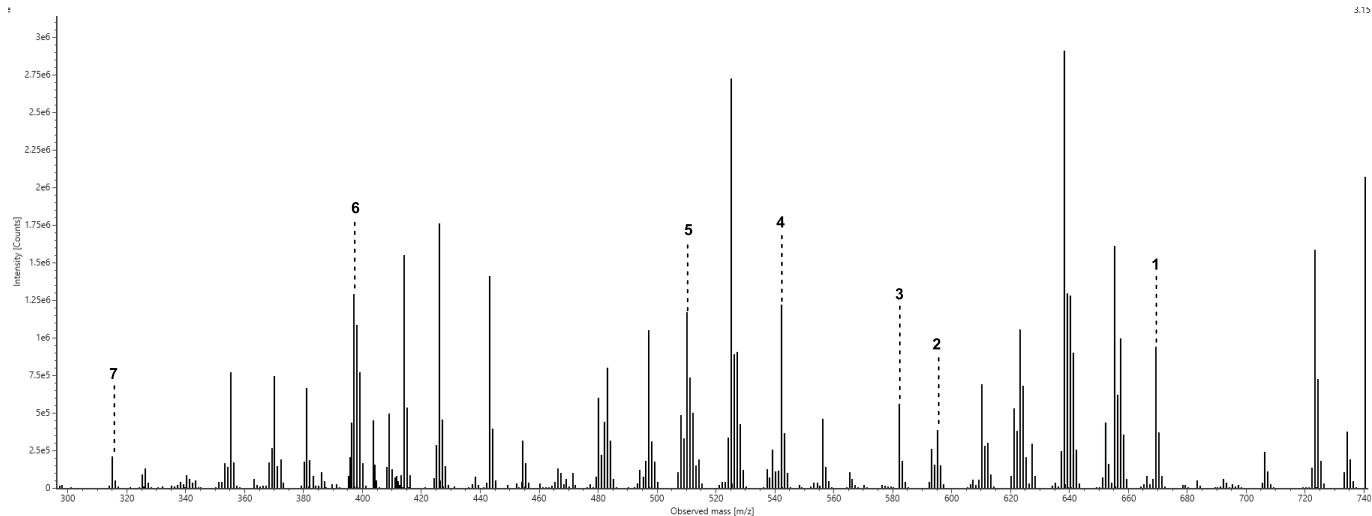

## Supplementary Fig. 54: MS2 spectrum for Cyclic Peptide 7 (Cyc 7)

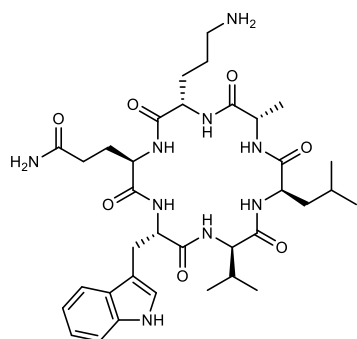

Chemical Formula:  $C_{35}H_{53}N_9O_7$   
 Expected Neutral Mass: 711.4068  
 Observed Neutral Mass: 711.4061  
 Mass Error (ppm): 1.0

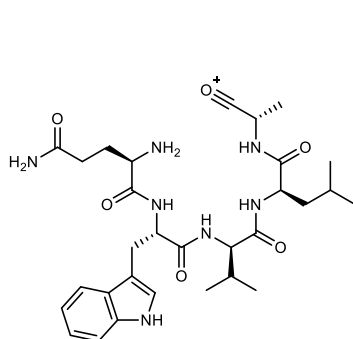

Chemical Formula:  $C_{30}H_{44}N_7O_6^+$   
 Expected m/z: 598.335  
 Observed m/z: 598.335  
 Mass Error (mDa): > 1.0

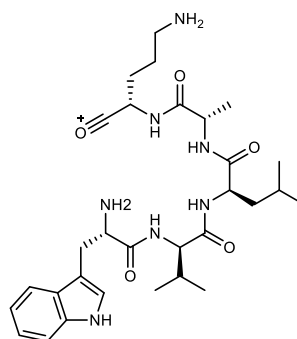

Chemical Formula:  $C_{30}H_{46}N_7O_5^+$   
 Expected m/z: 584.355  
 Observed m/z: 584.355  
 Mass Error (mDa): > 1.0

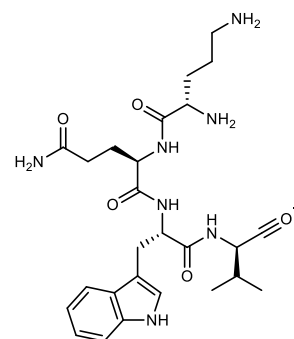

Chemical Formula:  $C_{26}H_{38}N_7O_5^+$   
 Expected m/z: 528.293  
 Observed m/z: 528.297  
 Mass Error (mDa): 4.0

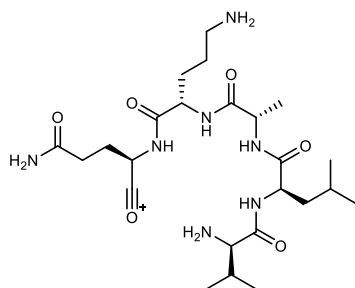

Chemical Formula:  $C_{24}H_{44}N_7O_6^+$   
 Expected m/z: 526.335  
 Observed m/z: 526.333  
 Mass Error (mDa): 2.0

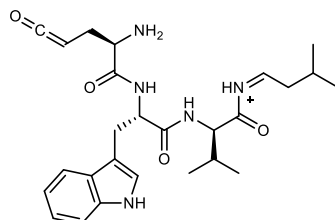

Chemical Formula:  $C_{26}H_{36}N_5O_4^+$   
 Expected m/z: 482.276  
 Observed m/z: 482.274  
 Mass Error (mDa): 2.0

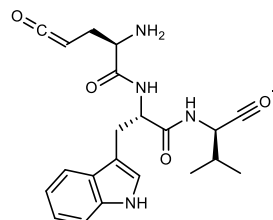

Chemical Formula:  $C_{21}H_{25}N_4O_4^+$   
 Expected m/z: 397.187  
 Observed m/z: 397.188  
 Mass Error (mDa): 1.0

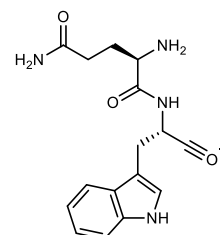

Chemical Formula:  $C_{16}H_{19}N_4O_3^+$   
 Expected m/z: 315.145  
 Observed m/z: 315.148  
 Mass Error (mDa): < 3.0

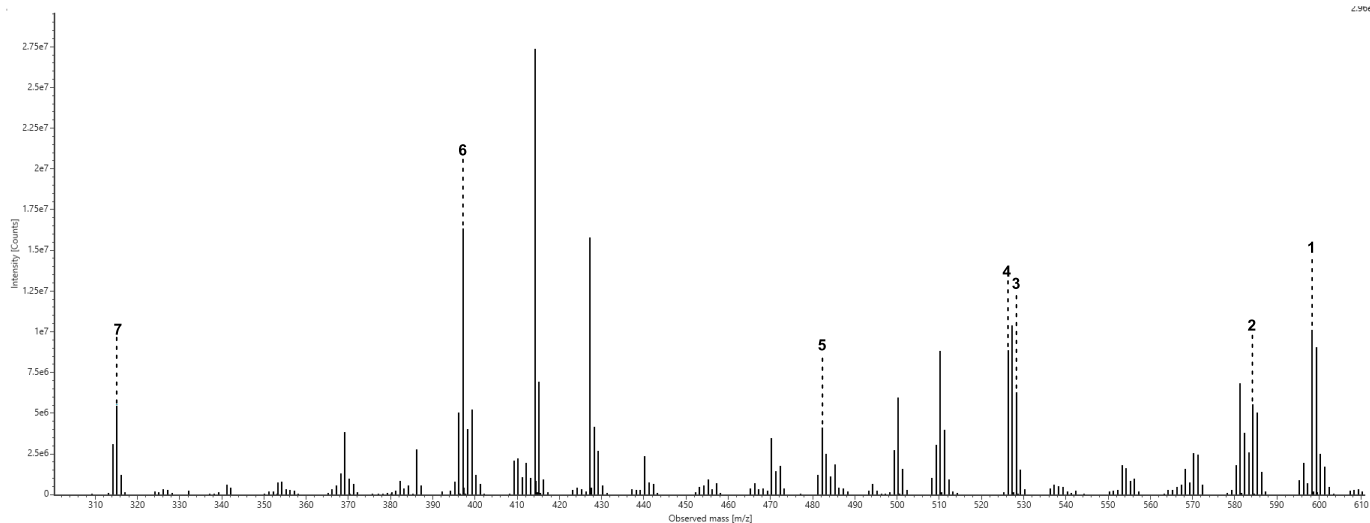

439e

# Supplementary Fig. 55: MS2 spectrum for Cyclic Peptide 8 (Cyc 8)

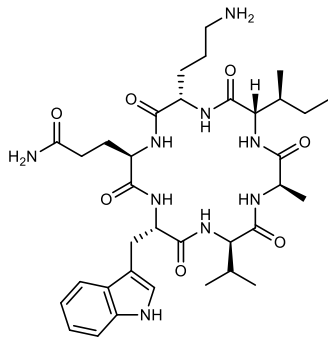

Chemical Formula:  $C_{38}H_{59}N_9O_7$   
 Expected Neutral Mass: 711.4068  
 Observed Neutral Mass: 711.4078  
 Mass Error (ppm): 1.4

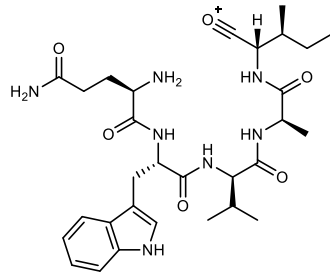

Chemical Formula:  $C_{30}H_{44}N_7O_6^+$   
 Expected m/z: 598.335  
 Observed m/z: 598.336  
 Mass Error (mDa): 1.0

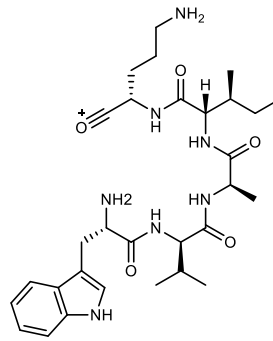

Chemical Formula:  $C_{30}H_{46}N_7O_5^+$   
 Expected m/z: 584.355  
 Observed m/z: 584.356  
 Mass Error (mDa): 1.0

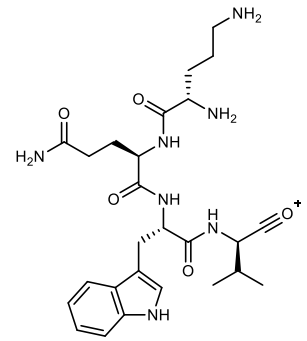

Chemical Formula:  $C_{26}H_{38}N_7O_5^+$   
 Expected m/z: 528.293  
 Observed m/z: 528.296  
 Mass Error (mDa): 3.0

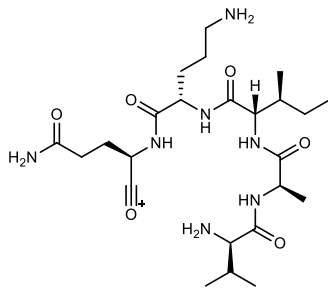

Chemical Formula:  $C_{24}H_{44}N_7O_6^+$   
 Expected m/z: 526.335  
 Observed m/z: 526.335  
 Mass Error (mDa): > 1.0

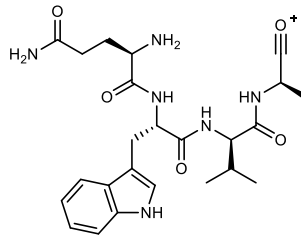

Chemical Formula:  $C_{24}H_{33}N_6O_5^+$   
 Expected m/z: 485.251  
 Observed m/z: 485.252  
 Mass Error (mDa): 1.0

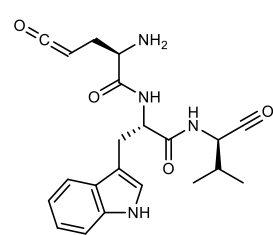

Chemical Formula:  $C_{21}H_{25}N_4O_4^+$   
 Expected m/z: 397.187  
 Observed m/z: 397.188  
 Mass Error (mDa): 1.0

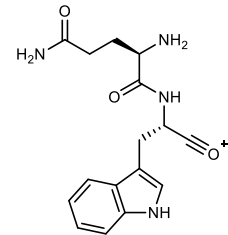

Chemical Formula:  $C_{16}H_{19}N_4O_3^+$   
 Expected m/z: 315.145  
 Observed m/z: 315.146  
 Mass Error (mDa): 1.0

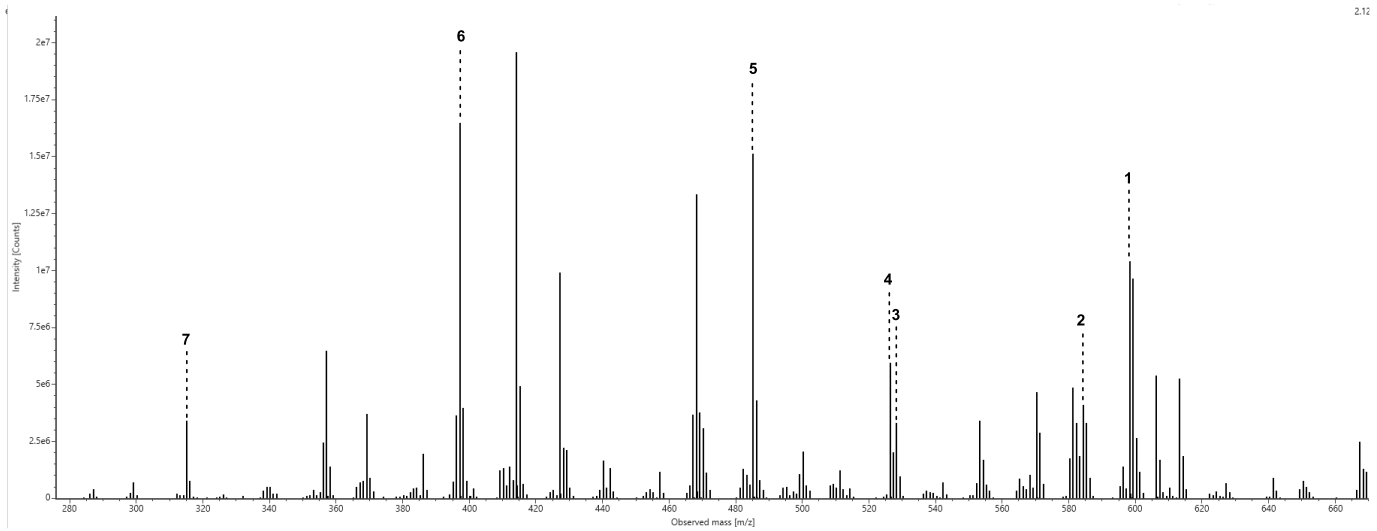

2.12

# Supplementary Fig. 56: MS2 spectrum for Cyclic peptide 9 (Cyc 9)

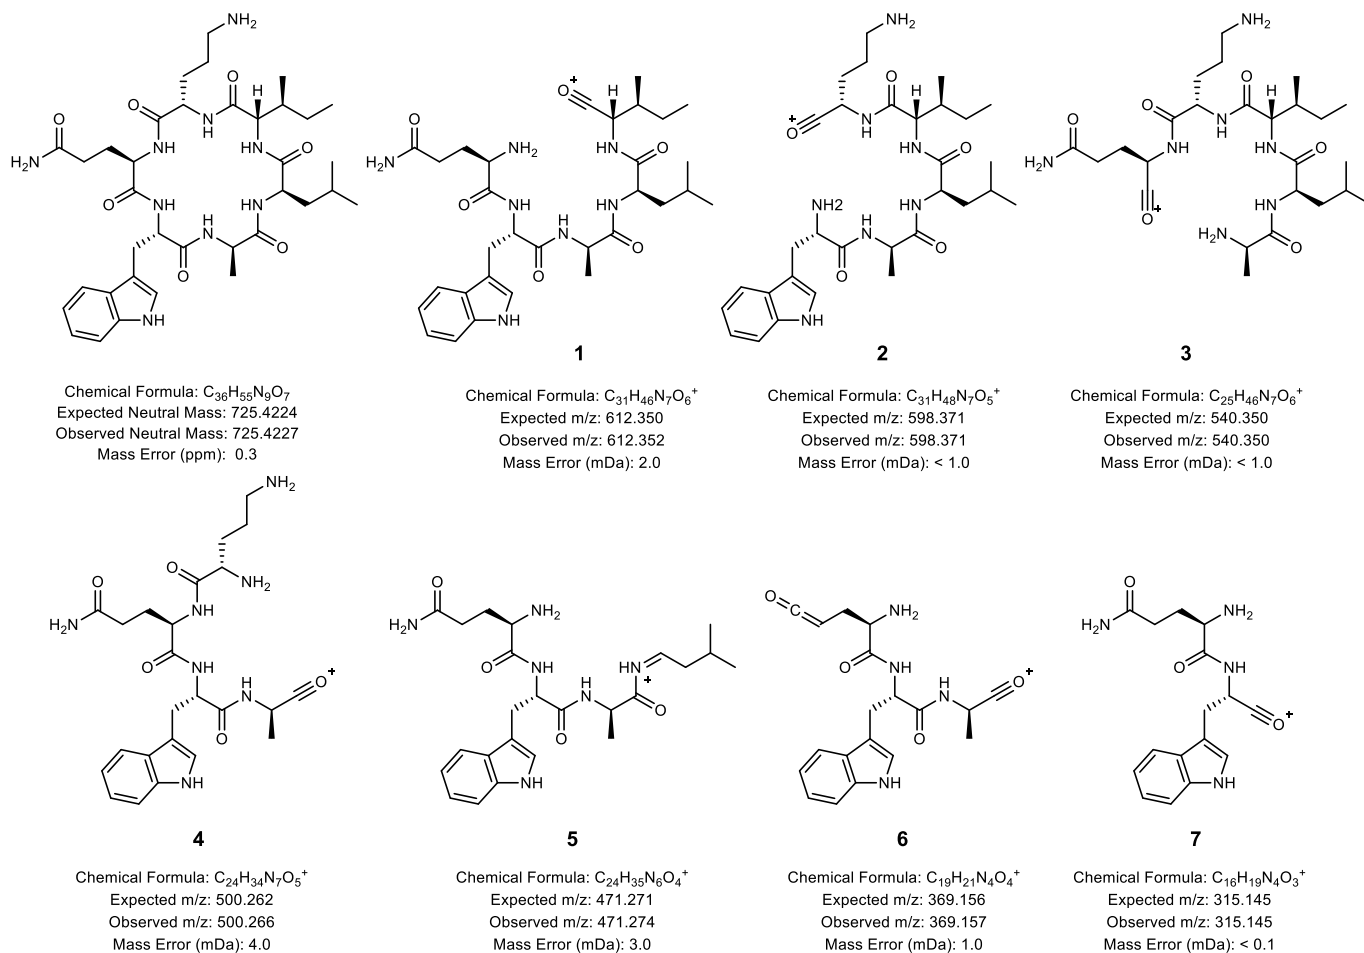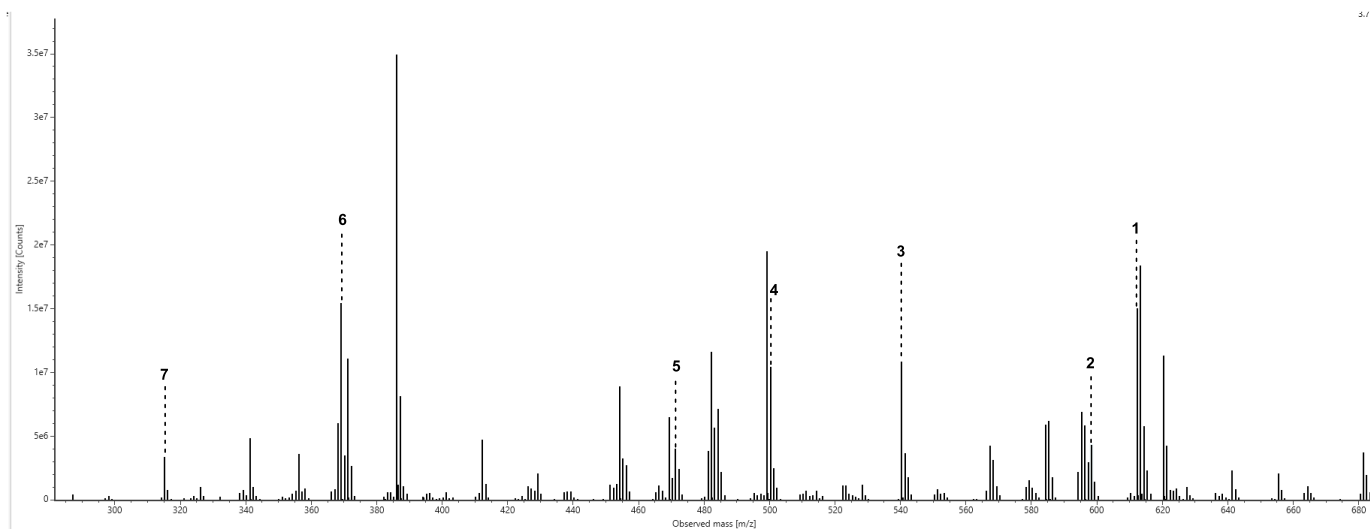

S171

## Supplementary Fig. 57: MS2 spectrum for Cyclic Peptide 10 (Cyc 10)

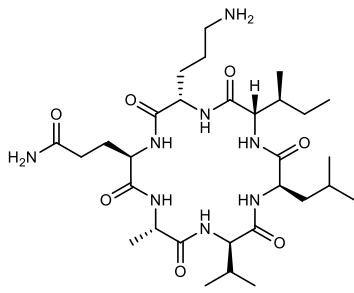

Chemical Formula:  $C_{30}H_{54}N_8O_7$   
 Expected Neutral Mass: 638.4115  
 Observed Neutral Mass: 638.4120  
 Mass Error (ppm): 0.7

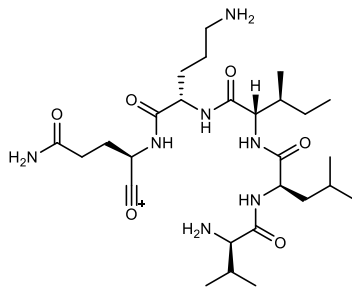

Chemical Formula:  $C_{27}H_{50}N_7O_6^+$   
 Expected m/z: 568.382  
 Observed m/z: 568.381  
 Mass Error (mDa): 1.0

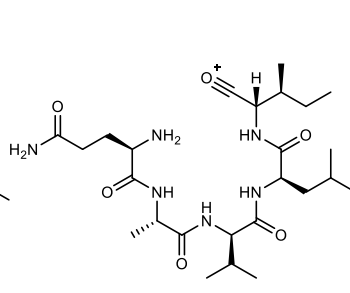

Chemical Formula:  $C_{25}H_{45}N_6O_6^+$   
 Expected m/z: 525.340  
 Observed m/z: 525.341  
 Mass Error (mDa): 1.0

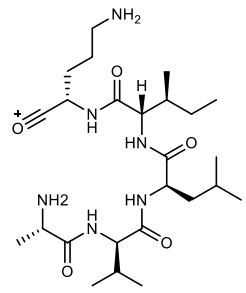

Chemical Formula:  $C_{25}H_{47}N_6O_5^+$   
 Expected m/z: 511.360  
 Observed m/z: 511.358  
 Mass Error (mDa): 2.0

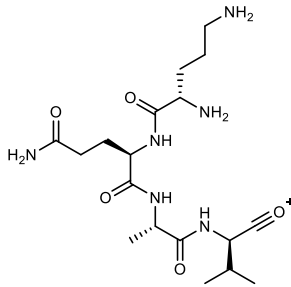

Chemical Formula:  $C_{18}H_{33}N_6O_5^+$   
 Expected m/z: 413.251  
 Observed m/z: 413.255  
 Mass Error (mDa): 4.0

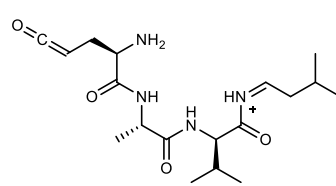

Chemical Formula:  $C_{18}H_{31}N_4O_4^+$   
 Expected m/z: 367.234  
 Observed m/z: 367.236  
 Mass Error (mDa): 2.0

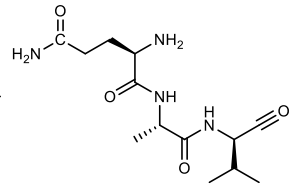

Chemical Formula:  $C_{13}H_{23}N_4O_4^+$   
 Expected m/z: 299.171  
 Observed m/z: 299.173  
 Mass Error (mDa): 2.0

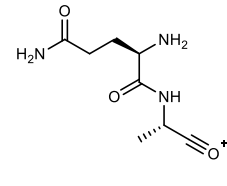

Chemical Formula:  $C_8H_{14}N_3O_3^+$   
 Expected m/z: 200.103  
 Observed m/z: 200.103  
 Mass Error (mDa): < 0.1

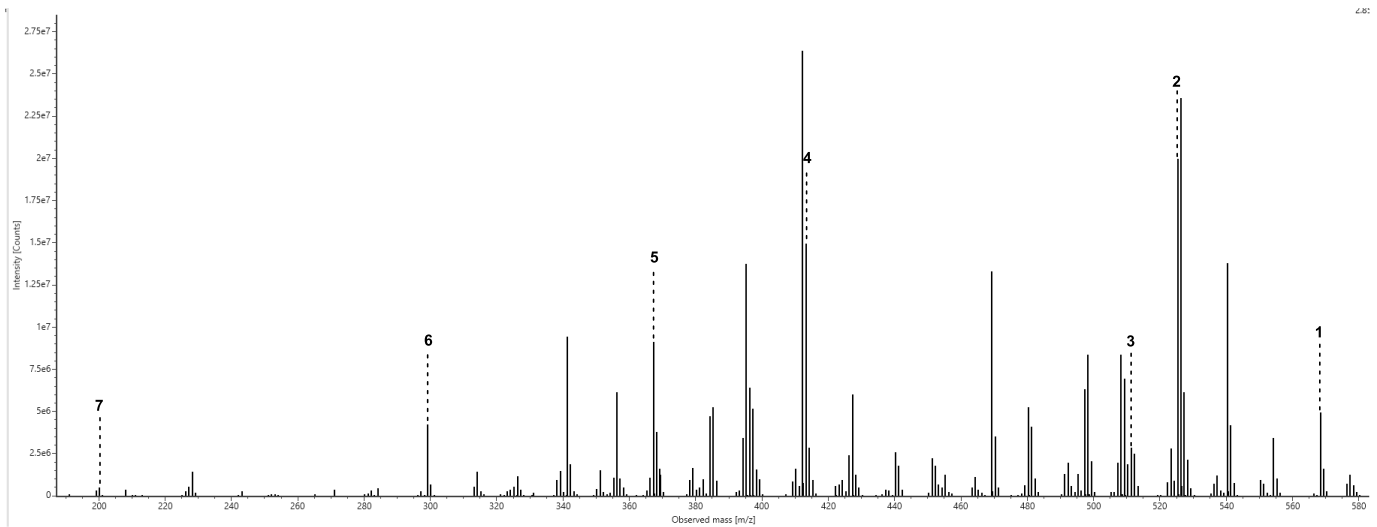

## Supplementary Fig. 58: MS2 spectrum for Cyclic Peptide 11 (Cyc11)

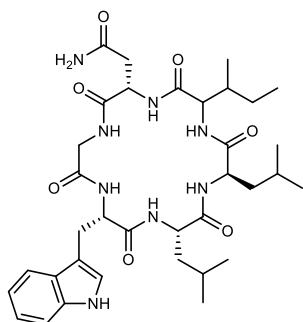

Chemical Formula:  $C_{35}H_{52}N_8O_7$   
 Expected Neutral Mass: 696.3959  
 Observed Neutral Mass: 696.3978  
 Mass Error (ppm): 2.7

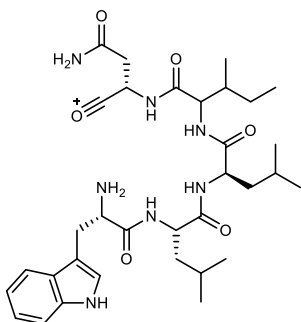

Chemical Formula:  $C_{33}H_{50}N_7O_6^+$   
 Expected m/z: 640.382  
 Observed m/z: 640.379  
 Mass Error (mDa): 3.0

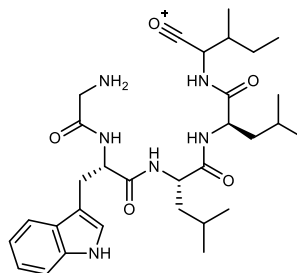

Chemical Formula:  $C_{31}H_{47}N_6O_5^+$   
 Expected m/z: 583.360  
 Observed m/z: 583.360  
 Mass Error (mDa): < 1.0

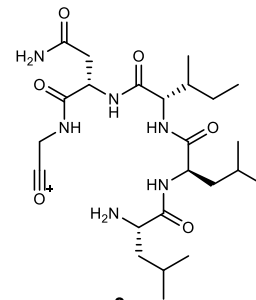

Chemical Formula:  $C_{24}H_{43}N_6O_6^+$   
 Expected m/z: 511.324  
 Observed m/z: 511.318  
 Mass Error (mDa): 6.0

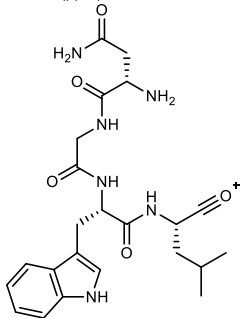

Chemical Formula:  $C_{23}H_{31}N_6O_5^+$   
 Expected m/z: 471.235  
 Observed m/z: 471.236  
 Mass Error (mDa): 1.0

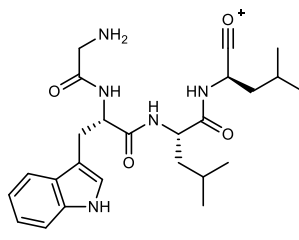

Chemical Formula:  $C_{25}H_{36}N_5O_4^+$   
 Expected m/z: 470.276  
 Observed m/z: 470.276  
 Mass Error (mDa): < 1.0

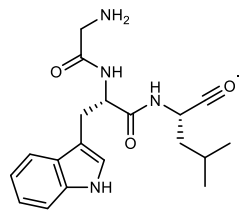

Chemical Formula:  $C_{19}H_{25}N_4O_3^+$   
 Expected m/z: 357.192  
 Observed m/z: 357.190  
 Mass Error (mDa): 2.0

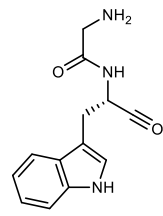

Chemical Formula:  $C_{13}H_{14}N_3O_2^+$   
 Expected m/z: 244.108  
 Observed m/z: 244.105  
 Mass Error (mDa): 3.0

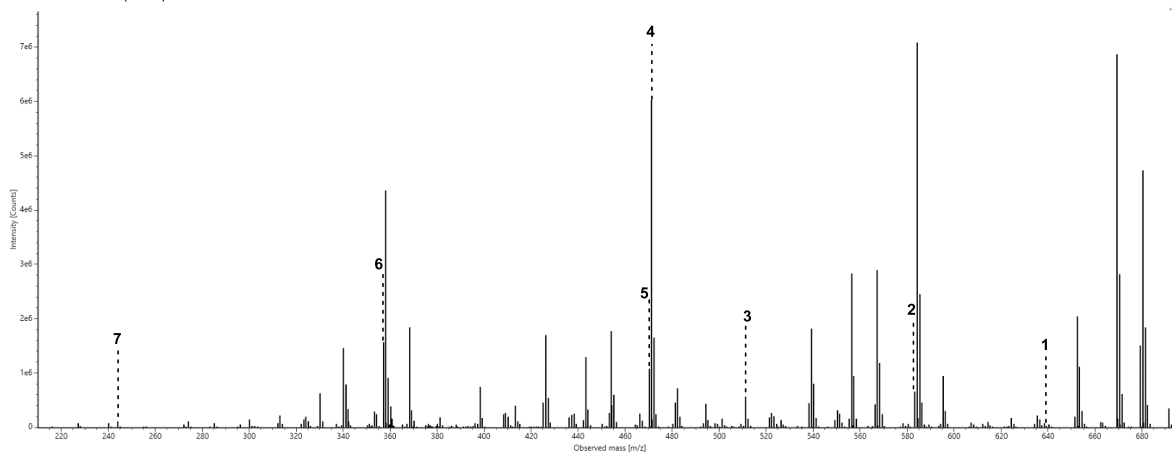



## Supplementary Fig. 59: MS2 spectrum for Cyclic Peptide 12 (Cyc12)

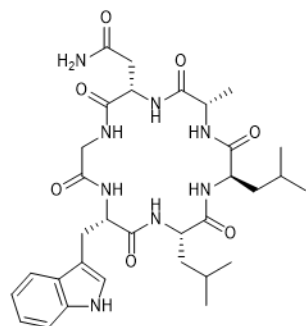

Chemical Formula:  $C_{32}H_{46}N_6O_7$   
 Expected Neutral Mass: 654.3489  
 Observed Neutral Mass: 654.3499  
 Mass Error (ppm): 1.5

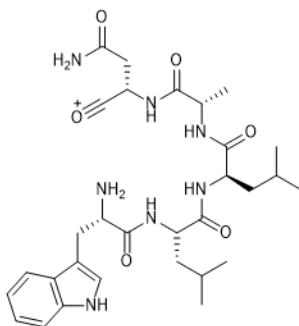

Chemical Formula:  $C_{30}H_{44}N_7O_6^+$   
 Expected m/z: 598.335  
 Observed m/z: 598.331  
 Mass Error (mDa): 4.0

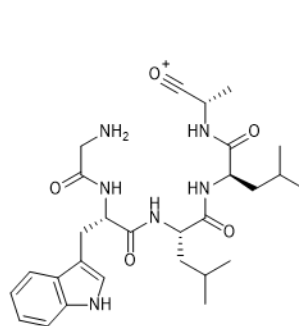

Chemical Formula:  $C_{28}H_{41}N_6O_5^+$   
 Expected m/z: 541.313  
 Observed m/z: 541.313  
 Mass Error (mDa): < 1.0

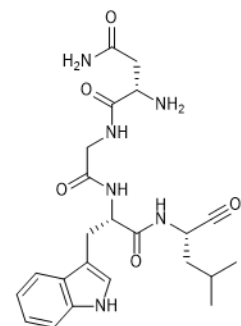

Chemical Formula:  $C_{23}H_{31}N_6O_5^+$   
 Expected m/z: 471.235  
 Observed m/z: 471.236  
 Mass Error (mDa): 1.0

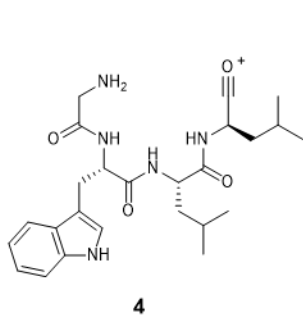

Chemical Formula:  $C_{25}H_{36}N_5O_4^+$   
 Expected m/z: 470.276  
 Observed m/z: 470.275  
 Mass Error (mDa): 1.0

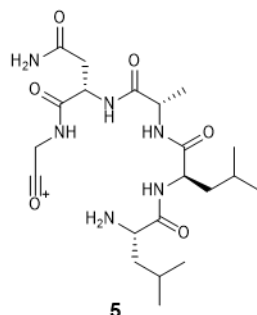

Chemical Formula:  $C_{21}H_{37}N_6O_6^+$   
 Expected m/z: 469.277  
 Observed m/z: 469.274  
 Mass Error (mDa): 3.0

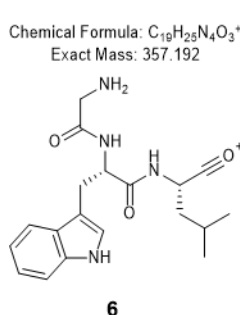

Chemical Formula:  $C_{19}H_{25}N_4O_3^+$   
 Exact Mass: 357.192

Chemical Formula:  $C_{19}H_{25}N_4O_3^+$   
 Expected m/z: 357.192  
 Observed m/z: 357.190  
 Mass Error (mDa): 2.0

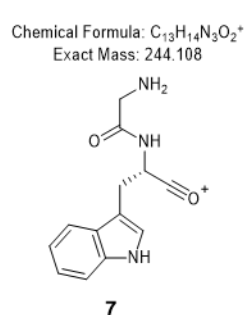

Chemical Formula:  $C_{13}H_{14}N_3O_2^+$   
 Exact Mass: 244.108

Chemical Formula:  $C_{13}H_{14}N_3O_2^+$   
 Expected m/z: 244.108  
 Observed m/z: 244.106  
 Mass Error (mDa): 2.0

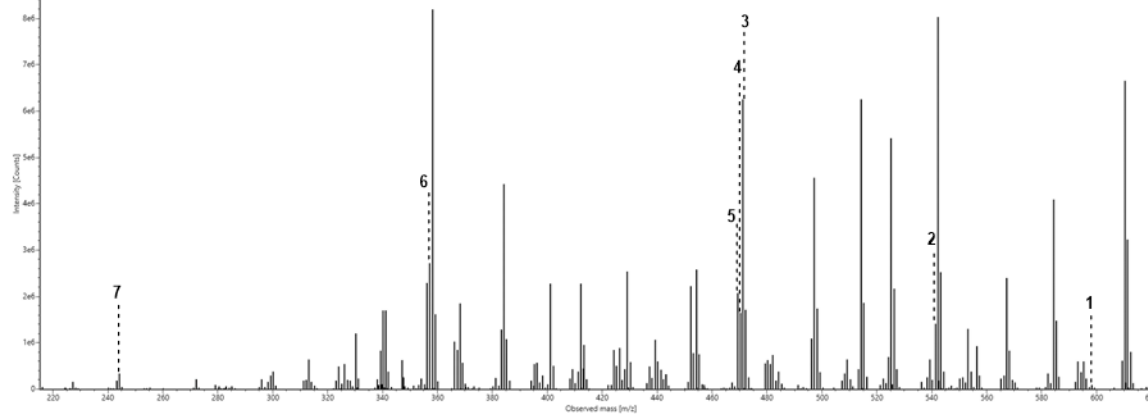

# Supplementary Fig. 60: MS2 spectrum for Cyclic Peptide 13 (Cyc13)

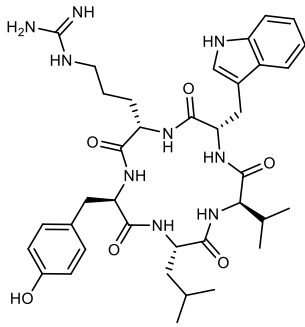

Chemical Formula:  $C_{37}H_{51}N_9O_6$   
 Expected Neutral Mass: 717.3962  
 Observed Neutral Mass: 717.3969  
 Mass Error (ppm): 1.0

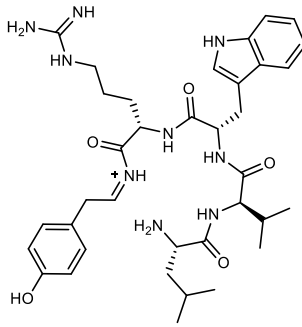

Chemical Formula:  $C_{36}H_{52}N_9O_5^+$   
 Expected m/z: 690.409  
 Observed m/z: 690.409  
 Mass Error (mDa): < 1.0

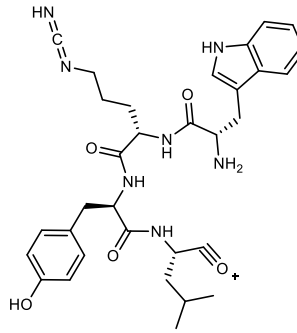

Chemical Formula:  $C_{32}H_{40}N_7O_5^+$   
 Expected m/z: 602.309  
 Observed m/z: 602.309  
 Mass Error (mDa): 1.0

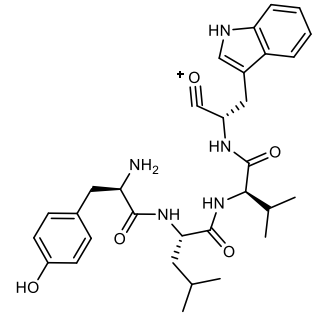

Chemical Formula:  $C_{31}H_{40}N_5O_5^+$   
 Expected m/z: 562.302  
 Observed m/z: 562.304  
 Mass Error (mDa): 2.0

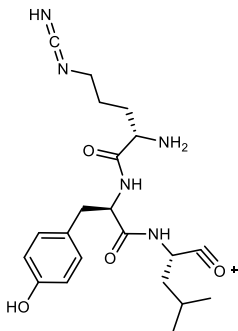

Chemical Formula:  $C_{21}H_{30}N_5O_4^+$   
 Expected m/z: 416.229  
 Observed m/z: 416.230  
 Mass Error (mDa): 1.0

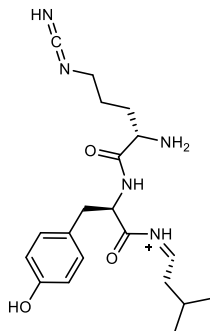

Chemical Formula:  $C_{20}H_{30}N_5O_3^+$   
 Expected m/z: 388.234  
 Observed m/z: 388.234  
 Mass Error (mDa): < 1.0

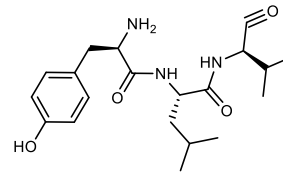

Chemical Formula:  $C_{20}H_{30}N_3O_4^+$   
 Expected m/z: 376.223  
 Observed m/z: 376.223  
 Mass Error (mDa): < 1.0

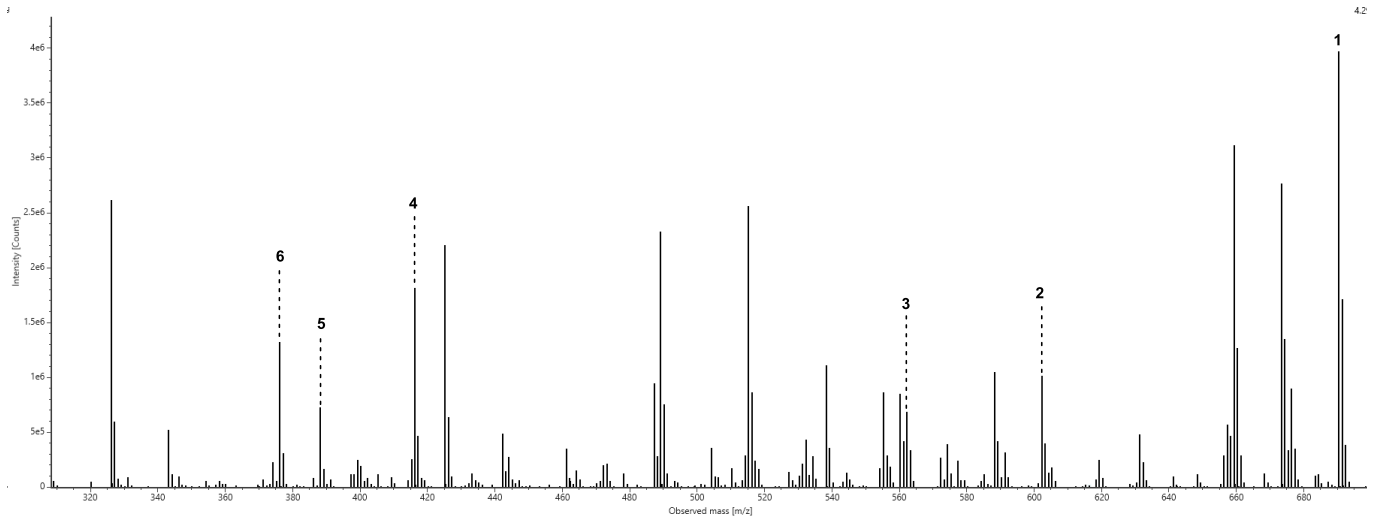

## Supplementary Fig. 61: MS2 spectrum for Cyclic Peptide 14 (Cyc14)

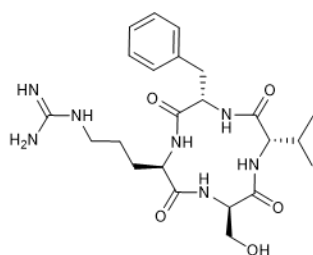

Chemical Formula:  $C_{23}H_{35}N_7O_5$   
 Expected Neutral Mass: 489.2699  
 Observed Neutral Mass: 489.2697  
 Mass Error (ppm): 0.6

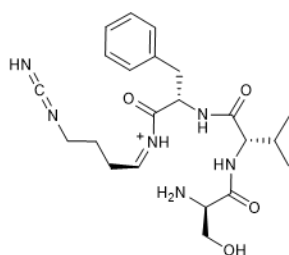

1  
 Chemical Formula:  $C_{22}H_{33}N_6O_4^+$   
 Expected m/z: 445.256  
 Observed m/z: 445.256  
 Mass Error (mDa): < 1.0

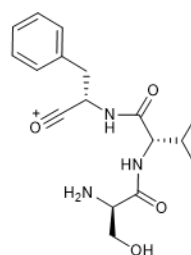

2  
 Chemical Formula:  $C_{17}H_{24}N_3O_4^+$   
 Expected m/z: 334.176  
 Observed m/z: 334.176  
 Mass Error (mDa): < 1.0

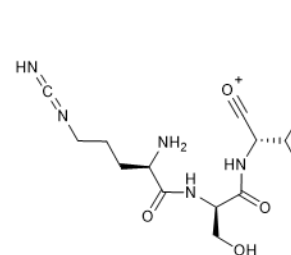

3  
 Chemical Formula:  $C_{14}H_{24}N_5O_4^+$   
 Expected m/z: 326.182  
 Observed m/z: 326.183  
 Mass Error (mDa): 1.0

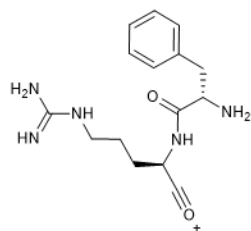

4  
 Chemical Formula:  $C_{15}H_{22}N_5O_2^+$   
 Expected m/z: 304.177  
 Observed m/z: 304.176  
 Mass Error (mDa): 1.0

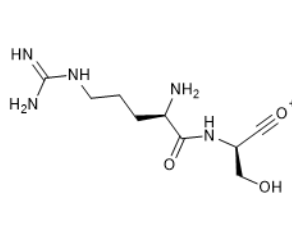

5  
 Chemical Formula:  $C_9H_{18}N_5O_3^+$   
 Expected m/z: 244.140  
 Observed m/z: 244.140  
 Mass Error (mDa): < 1.0

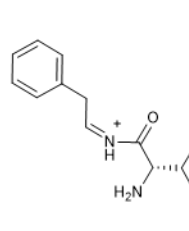

6  
 Chemical Formula:  $C_{13}H_{18}N_2O^+$   
 Expected m/z: 219.149  
 Observed m/z: 219.148  
 Mass Error (mDa): 1.0

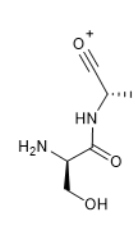

7  
 Chemical Formula:  $C_8H_{12}N_2O_3^+$   
 Expected m/z: 187.108  
 Observed m/z: 187.107  
 Mass Error (mDa): 1.0

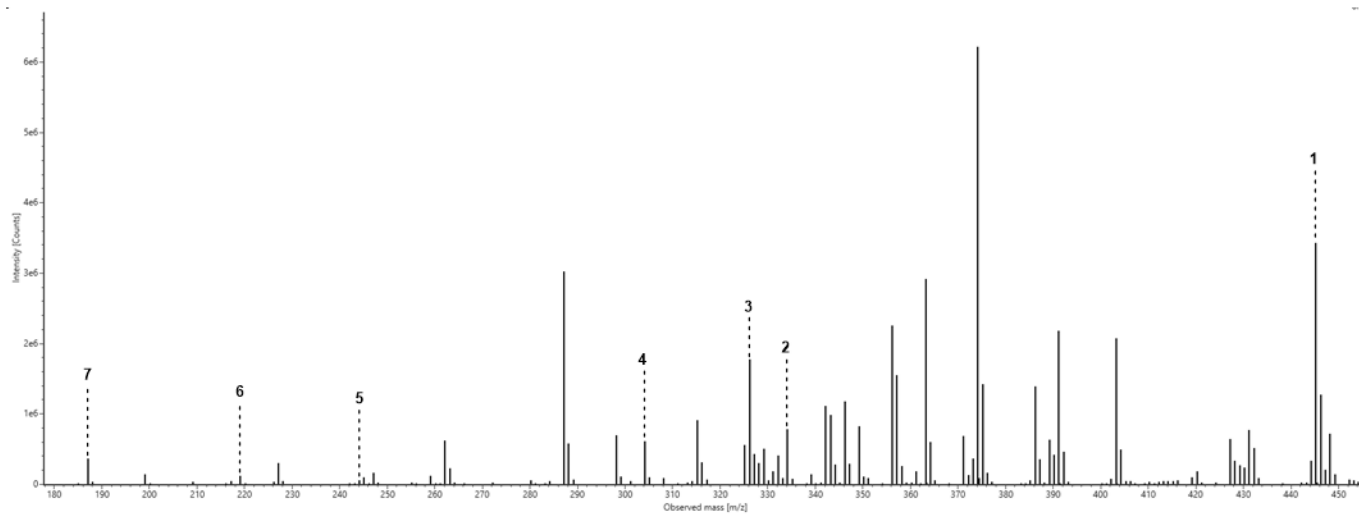

## Supplementary Fig. 62: MS2 spectrum for Cyclic Peptide 15 (Cyc15)

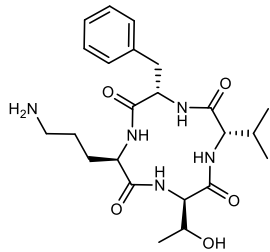

Chemical Formula:  $C_{23}H_{35}N_5O_5$   
 Expected Neutral Mass: 461.2638  
 Observed Neutral Mass: 461.2635  
 Mass Error (ppm): 0.7

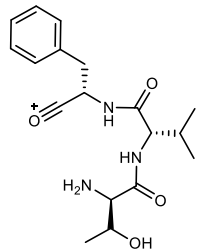

**1**  
 Chemical Formula:  $C_{18}H_{26}N_3O_4^+$   
 Expected m/z: 348.192  
 Observed m/z: 348.192  
 Mass Error (mDa): < 1.0

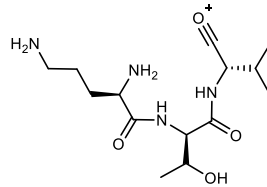

**2**  
 Chemical Formula:  $C_{14}H_{27}N_4O_4^+$   
 Expected m/z: 315.203  
 Observed m/z: 315.202  
 Mass Error (mDa): 1.0

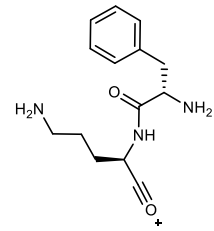

**3**  
 Chemical Formula:  $C_{14}H_{20}N_3O_2^+$   
 Expected m/z: 262.155  
 Observed m/z: 262.155  
 Mass Error (mDa): < 1.0

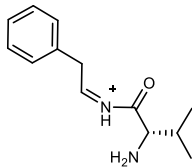

**4**  
 Chemical Formula:  $C_{13}H_{19}N_2O^+$   
 Expected m/z: 219.149  
 Observed m/z: 219.148  
 Mass Error (mDa): 1.0

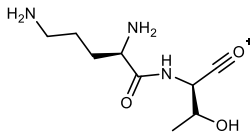

**5**  
 Chemical Formula:  $C_9H_{18}N_3O_3^+$   
 Expected m/z: 216.134  
 Observed m/z: 216.134  
 Mass Error (mDa): < 1.0

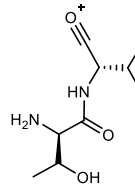

**6**  
 Chemical Formula:  $C_9H_{17}N_2O_3^+$   
 Expected m/z: 201.123  
 Observed m/z: 201.123  
 Mass Error (mDa): < 1.0

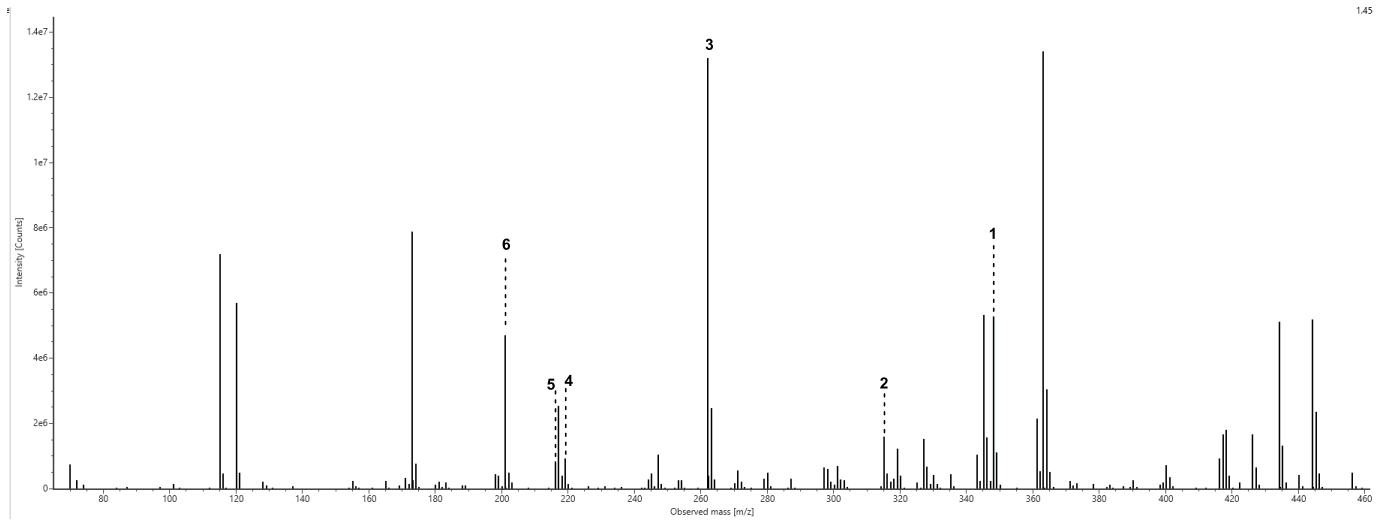

145

# Supplementary Fig. 63: MS2 spectrum for Cyclic Peptide 16 (Cyc16)

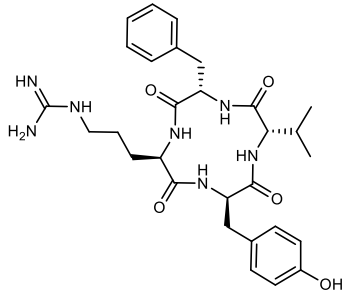

Chemical Formula:  $C_{29}H_{39}N_7O_5$   
 Expected Neutral Mass: 565.3012  
 Observed Neutral Mass: 565.3019  
 Mass Error (ppm): 1.1

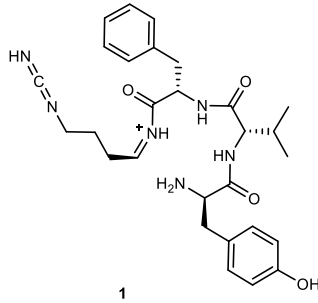

Chemical Formula:  $C_{28}H_{37}N_6O_4^+$   
 Expected m/z: 521.287  
 Observed m/z: 521.287  
 Mass Error (mDa): < 1.0

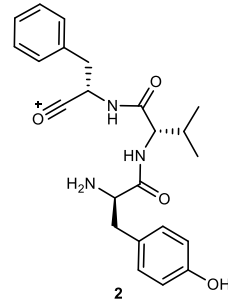

Chemical Formula:  $C_{23}H_{28}N_3O_4^+$   
 Expected m/z: 410.207  
 Observed m/z: 410.208  
 Mass Error (mDa): 1.0

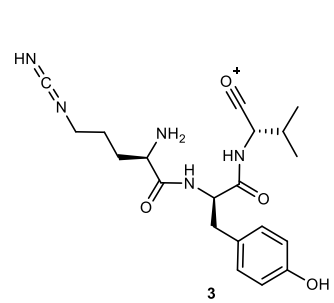

Chemical Formula:  $C_{20}H_{28}N_5O_4^+$   
 Expected m/z: 402.214  
 Observed m/z: 402.216  
 Mass Error (mDa): 2.0

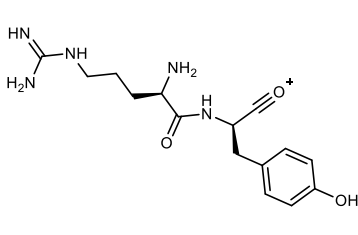

Chemical Formula:  $C_{15}H_{22}N_5O_3^+$   
 Expected m/z: 320.172  
 Observed m/z: 320.172  
 Mass Error (mDa): < 1.0

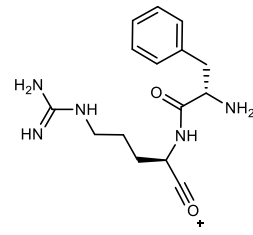

Chemical Formula:  $C_{15}H_{22}N_5O_2^+$   
 Expected m/z: 304.177  
 Observed m/z: 304.175  
 Mass Error (mDa): 2.0

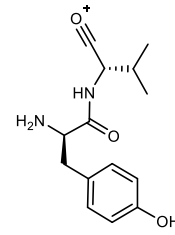

Chemical Formula:  $C_{14}H_{19}N_2O_3^+$   
 Expected m/z: 263.139  
 Observed m/z: 263.141  
 Mass Error (mDa): 2.0

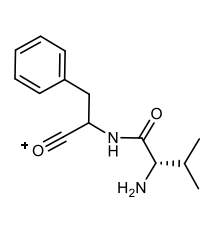

Chemical Formula:  $C_{14}H_{19}N_2O_2^+$   
 Expected m/z: 247.144  
 Observed m/z: 247.146  
 Mass Error (mDa): 2.0

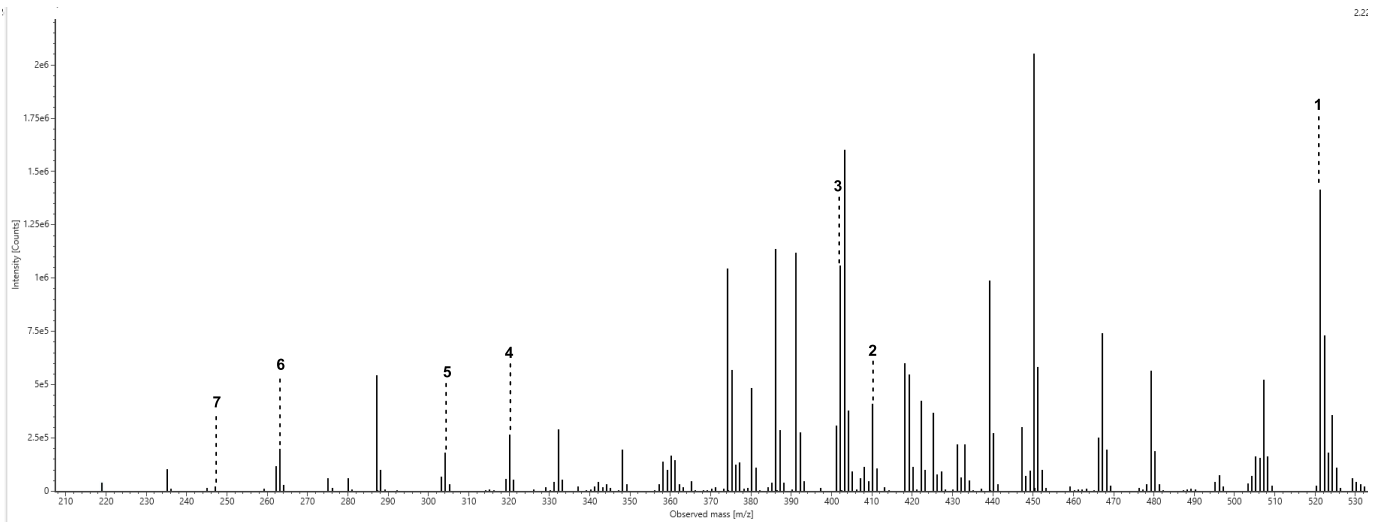

22:

# Supplementary Fig. 64: MS2 spectrum for Cyclic Peptide 17 (Cyc17)

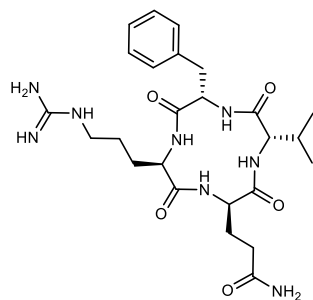

Chemical Formula:  $C_{25}H_{38}N_8O_5$   
 Expected Neutral Mass: 530.2965  
 Observed Neutral Mass: 530.2965  
 Mass Error (ppm): 0.1

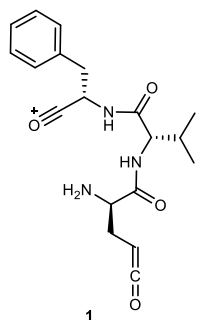

Chemical Formula:  $C_{19}H_{27}N_4O_4^+$   
 Expected m/z: 358.176  
 Observed m/z: 358.181  
 Mass Error (mDa): 5.0

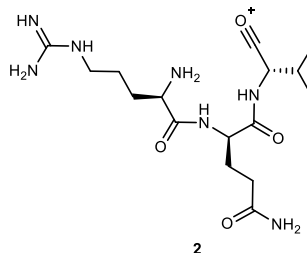

Chemical Formula:  $C_{16}H_{30}N_7O_4^+$   
 Expected m/z: 384.235  
 Observed m/z: 384.237  
 Mass Error (mDa): 2.0

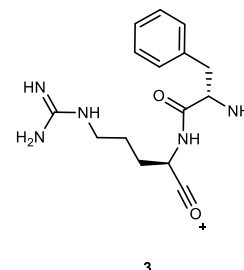

Chemical Formula:  $C_{15}H_{22}N_5O_2^+$   
 Expected m/z: 304.176  
 Observed m/z: 304.175  
 Mass Error (mDa): 1.0

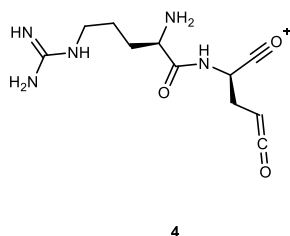

Chemical Formula:  $C_{11}H_{18}N_5O_3^+$   
 Expected m/z: 268.140  
 Observed m/z: 268.139  
 Mass Error (mDa): 1.0

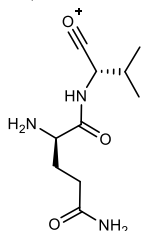

Chemical Formula:  $C_{10}H_{18}N_3O_3^+$   
 Expected m/z: 228.134  
 Observed m/z: 228.139  
 Mass Error (mDa): 5.0

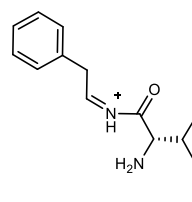

Chemical Formula:  $C_{13}H_{19}N_2O^+$   
 Expected m/z: 219.149  
 Observed m/z: 219.147  
 Mass Error (mDa): 2.0

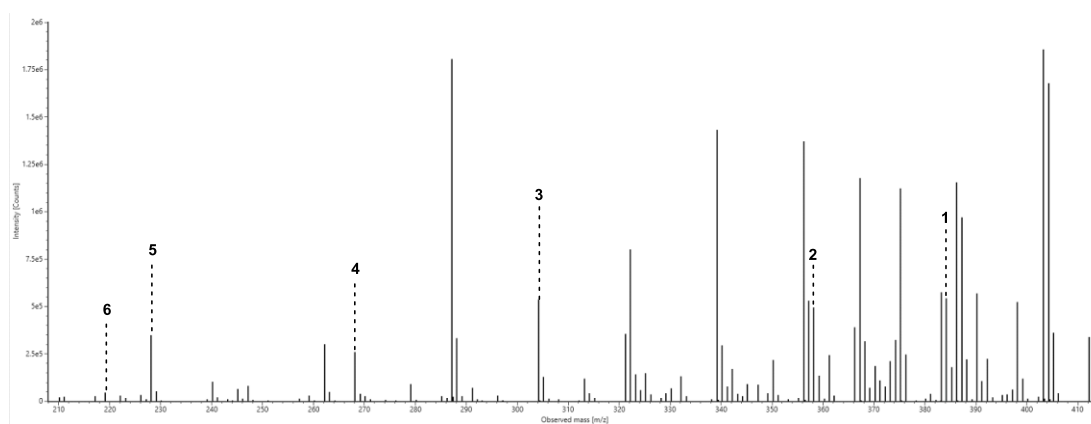

### Supplementary Fig. 65: MS2 spectrum for Cyclic Peptide 18 (Cyc18)

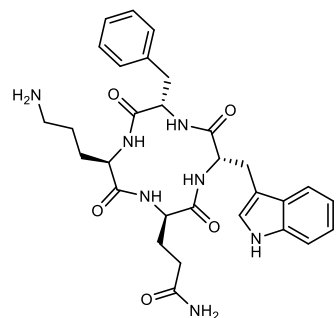

Chemical Formula:  $C_{30}H_{37}N_7O_5$   
 Expected Neutral Mass: 575.2856  
 Observed Neutral Mass: 575.2852  
 Mass Error (ppm): 0.7

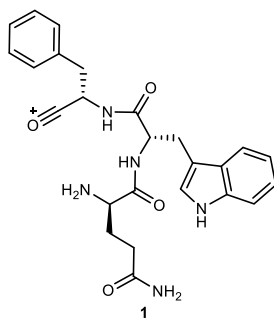

Chemical Formula:  $C_{25}H_{28}N_5O_4^+$   
 Expected m/z: 462.214  
 Observed m/z: 462.214  
 Mass Error (mDa): < 1.0

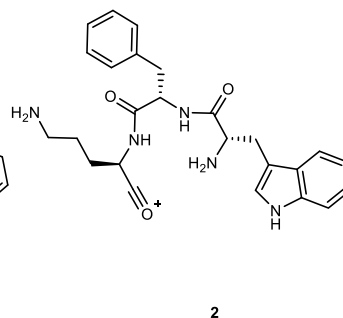

Chemical Formula:  $C_{25}H_{30}N_5O_3^+$   
 Expected m/z: 448.234  
 Observed m/z: 448.234  
 Mass Error (mDa): < 1.0

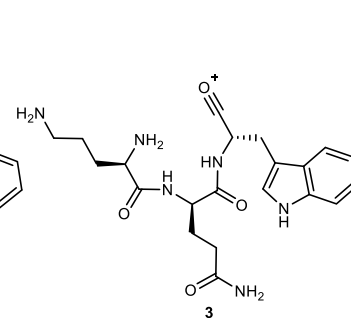

Chemical Formula:  $C_{21}H_{29}N_6O_4^+$   
 Expected m/z: 429.224  
 Observed m/z: 429.223  
 Mass Error (mDa): 1.0

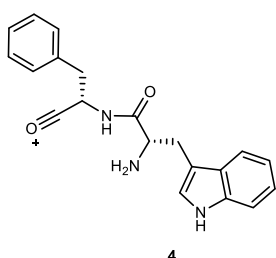

Chemical Formula:  $C_{20}H_{20}N_3O_2^+$   
 Expected m/z: 334.155  
 Observed m/z: 334.154  
 Mass Error (mDa): 1.0

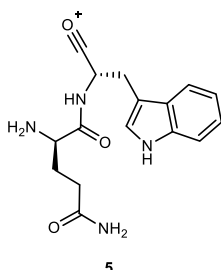

Chemical Formula:  $C_{16}H_{19}N_4O_3^+$   
 Expected m/z: 315.145  
 Observed m/z: 315.145  
 Mass Error (mDa): < 1.0

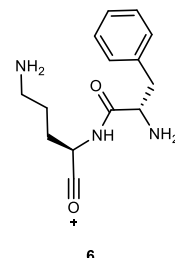

Chemical Formula:  $C_{14}H_{20}N_3O_2^+$   
 Expected m/z: 262.155  
 Observed m/z: 262.155  
 Mass Error (mDa): < 1.0

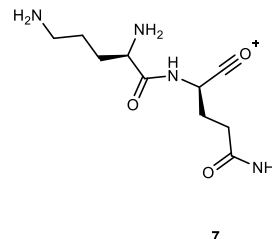

Chemical Formula:  $C_{10}H_{19}N_4O_3^+$   
 Expected m/z: 243.145  
 Observed m/z: 243.144  
 Mass Error (mDa): 1.0

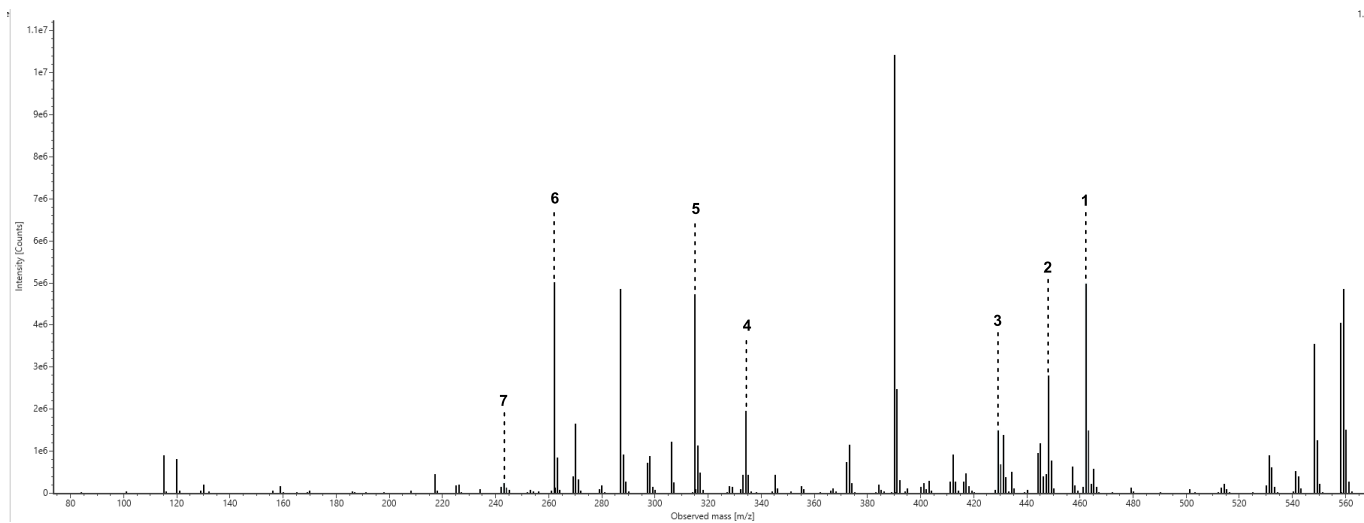

## Supplementary Fig. 66: MS2 spectrum for Cyclic Peptide 20 (Cyc20)

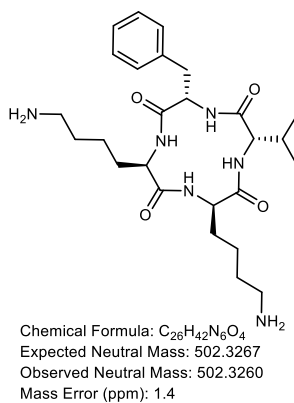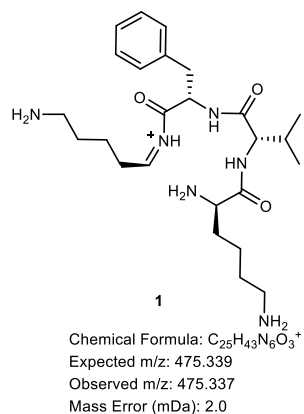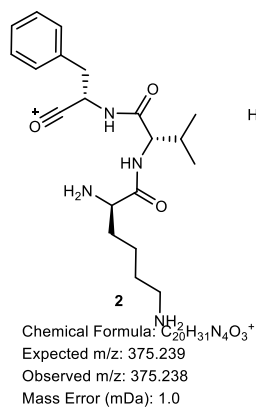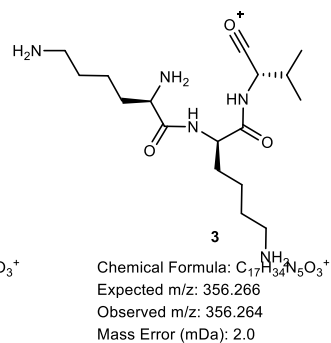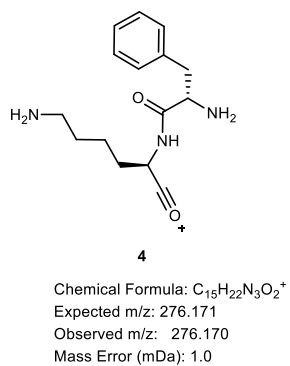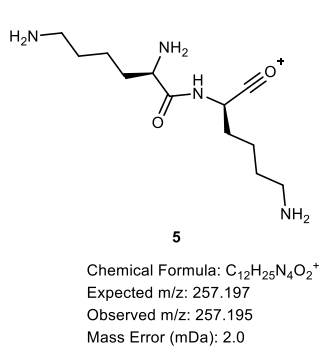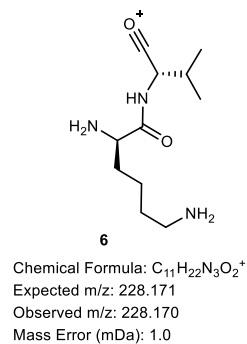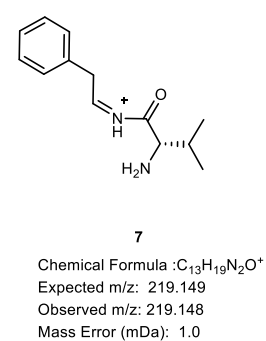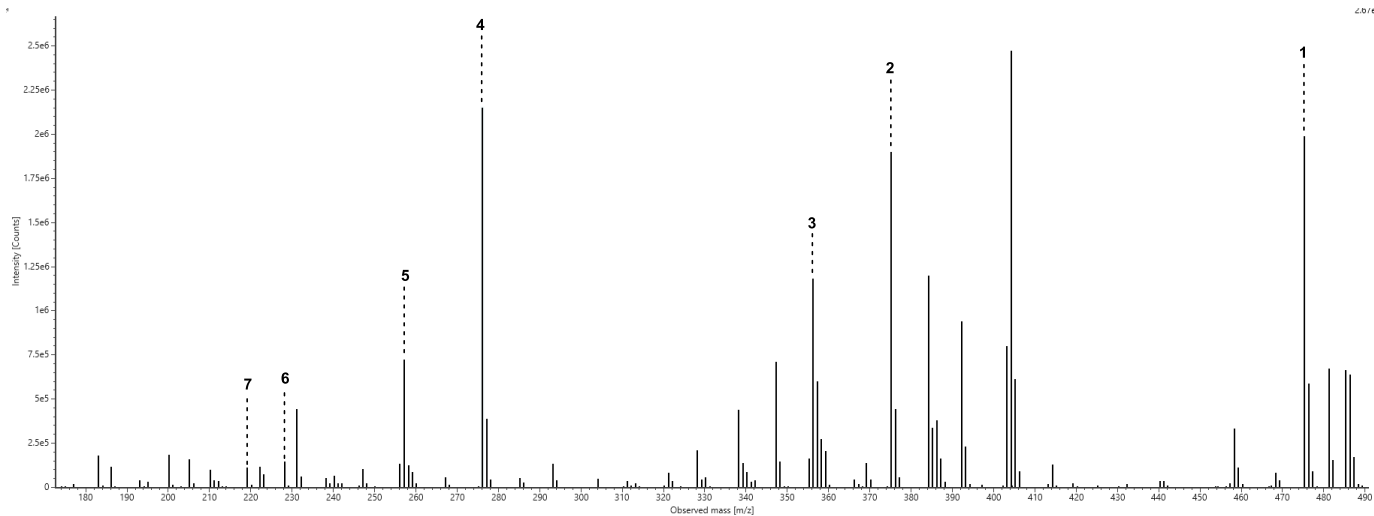



# Supplementary Fig. 67: MS2 spectrum for Cyclic Peptide 21 (Cyc21)

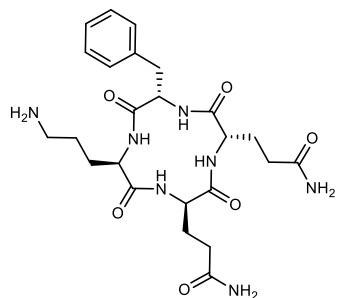

Chemical Formula:  $C_{24}H_{35}N_7O_6$   
 Expected Neutral Mass: 517.2648  
 Observed Neutral Mass: 517.2640  
 Mass Error (ppm): 1.7

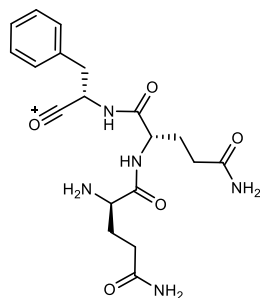

Chemical Formula:  $C_{19}H_{26}N_6O_5^+$   
 Expected m/z: 404.193  
 Observed m/z: 404.192  
 Mass Error (mDa): 1.0

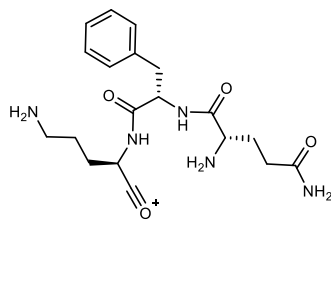

Chemical Formula:  $C_{19}H_{28}N_5O_4^+$   
 Expected m/z: 390.214  
 Observed m/z: 390.213  
 Mass Error (mDa): 1.0

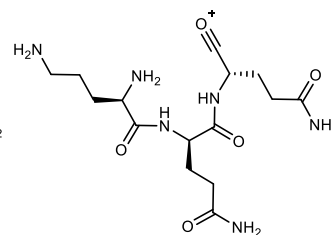

Chemical Formula:  $C_{15}H_{27}N_6O_5^+$   
 Expected m/z: 371.204  
 Observed m/z: 371.202  
 Mass Error (mDa): 2.0

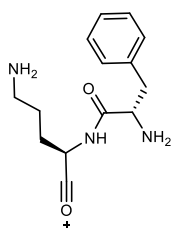

Chemical Formula:  $C_{14}H_{20}N_3O_2^+$   
 Expected m/z: 262.155  
 Observed m/z: 262.154  
 Mass Error (mDa): 1.0

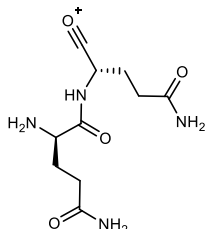

Chemical Formula:  $C_{10}H_{17}N_4O_4^+$   
 Expected m/z: 257.124  
 Observed m/z: 257.124  
 Mass Error (mDa): < 1.0

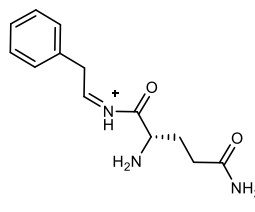

Chemical Formula:  $C_{13}H_{16}N_3O_2^+$   
 Expected m/z: 248.139  
 Observed m/z: 248.138  
 Mass Error (mDa): 1.0

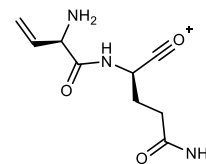

Chemical Formula:  $C_9H_{14}N_3O_3^+$   
 Expected m/z: 212.103  
 Observed m/z: 212.103  
 Mass Error (mDa): < 1.0

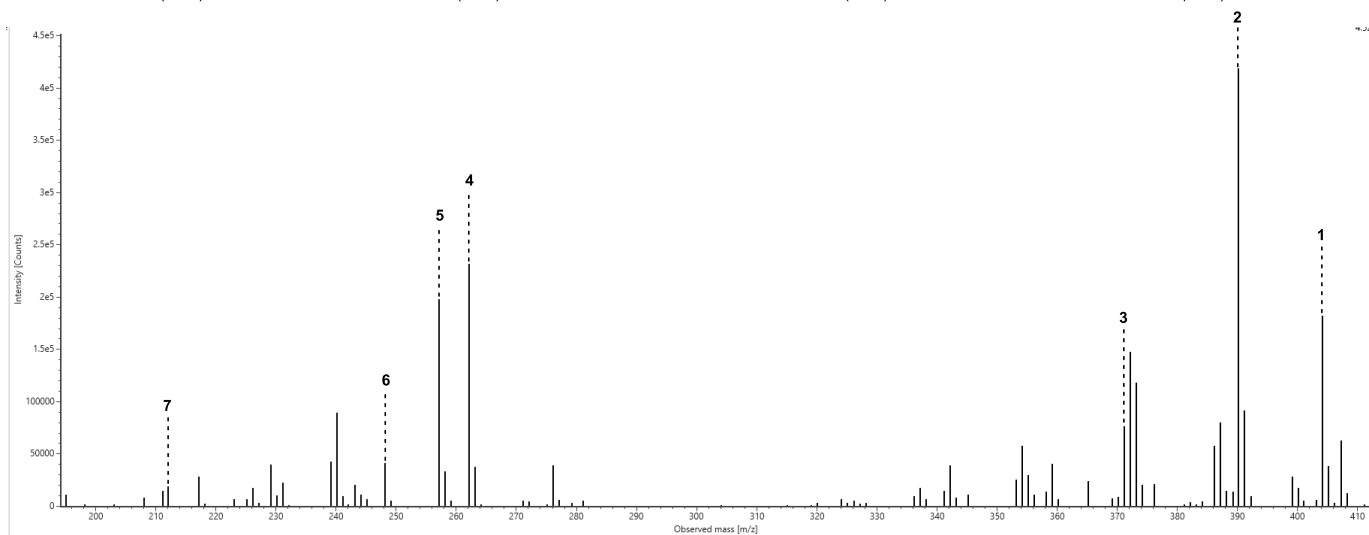

# Supplementary Fig. 68: MS2 spectrum for Cyclic Peptide 22 (Cyc22)

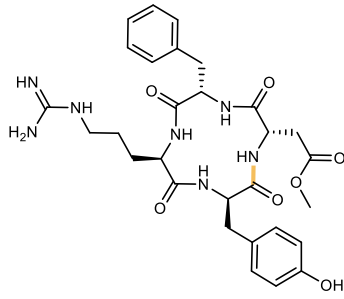

Chemical Formula:  $C_{29}H_{37}N_7O_7$   
 Expected Neutral Mass: 595.2754  
 Observed Neutral Mass: 595.2767  
 Mass Error (ppm): 2.1

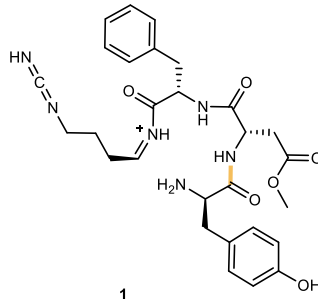

Chemical Formula:  $C_{28}H_{35}N_6O_6^+$   
 Expected m/z: 551.261  
 Observed m/z: 551.261  
 Mass Error (mDa): < 1.0

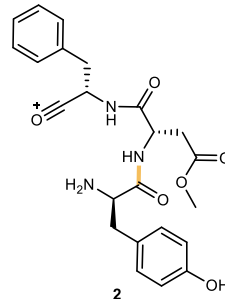

Chemical Formula:  $C_{23}H_{26}N_3O_6^+$   
 Expected m/z: 440.182  
 Observed m/z: 440.182  
 Mass Error (mDa): < 1.0

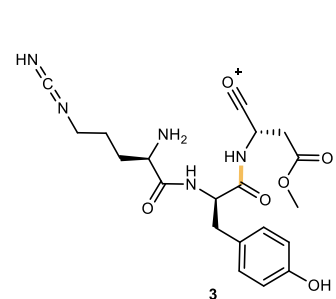

Chemical Formula:  $C_{20}H_{26}N_5O_6^+$   
 Expected m/z: 432.188  
 Observed m/z: 432.188  
 Mass Error (mDa): > 1.0

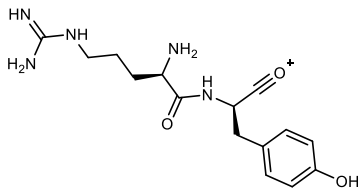

Chemical Formula:  $C_{15}H_{22}N_5O_3^+$   
 Expected m/z: 320.172  
 Observed m/z: 320.171  
 Mass Error (mDa): 1.0

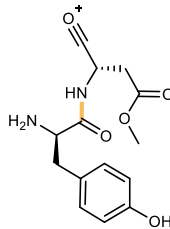

Chemical Formula:  $C_{14}H_{17}N_2O_5^+$   
 Expected m/z: 293.113  
 Observed m/z: 293.112  
 Mass Error (mDa): < 1.0

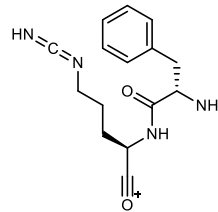

Chemical Formula:  $C_{15}H_{19}N_4O_2^+$   
 Expected m/z: 287.150  
 Observed m/z: 287.149  
 Mass Error (mDa): 2.0

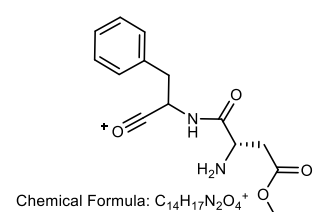

Chemical Formula:  $C_{14}H_{17}N_2O_4^+$   
 Exact Mass: 277.118  
 Observed m/z: 277.117  
 Mass Error (mDa): 1.0

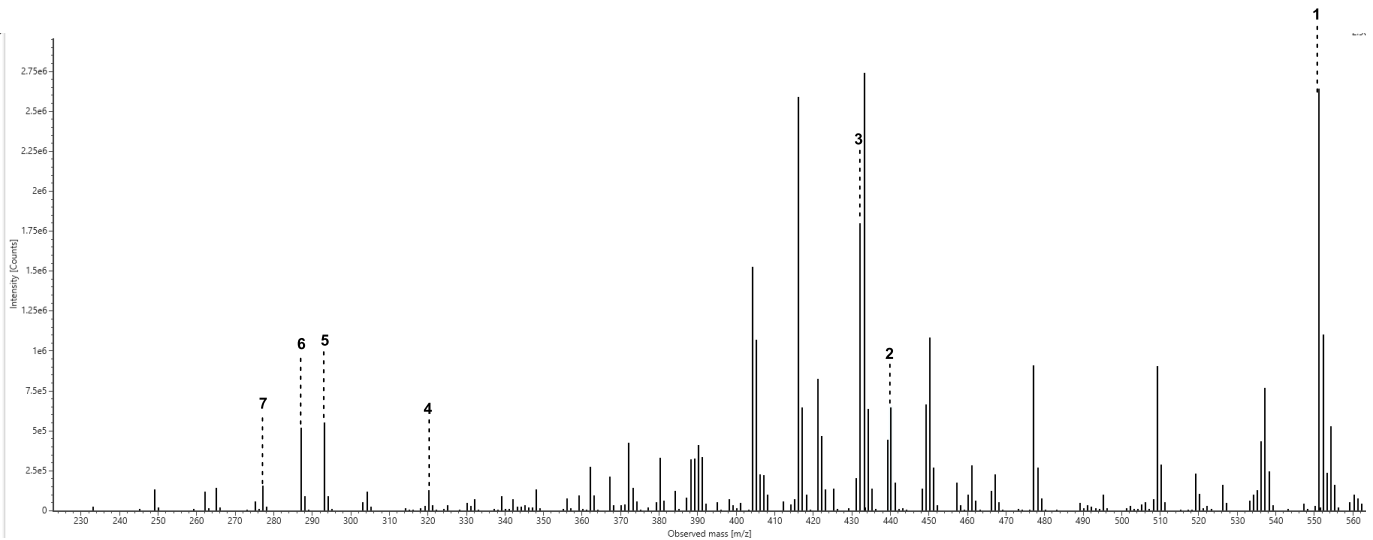

**Supplementary Fig. 69: MS2 spectrum for Cyclic Peptide 23 (Cyc23)**

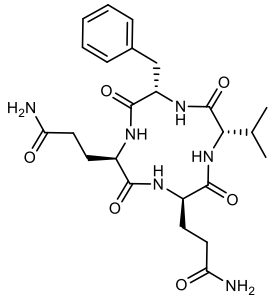

Chemical Formula:  $C_{24}H_{34}N_6O_6$   
 Expected Neutral Mass: 502.2539  
 Observed Neutral Mass: 502.2538  
 Mass Error (ppm): 0.3

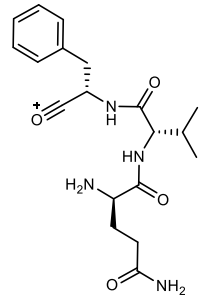

Chemical Formula:  $C_{19}H_{27}N_4O_4^+$   
 Expected m/z: 375.203  
 Observed m/z: 375.203  
 Mass Error (mDa): < 1.0

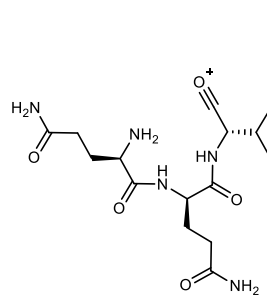

Chemical Formula:  $C_{16}H_{26}N_5O_5^+$   
 Expected m/z: 356.193  
 Observed m/z: 356.192  
 Mass Error (mDa): 1.0

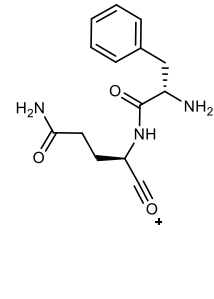

Chemical Formula:  $C_{14}H_{18}N_3O_3^+$   
 Expected m/z: 276.134  
 Observed m/z: 276.134  
 Mass Error (mDa): < 1.0

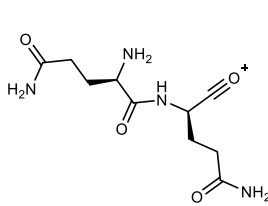

Chemical Formula:  $C_{10}H_{17}N_4O_4^+$   
 Expected m/z: 257.124  
 Observed m/z: 257.124  
 Mass Error (mDa): < 1.0

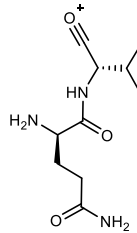

Chemical Formula:  $C_{10}H_{18}N_3O_3^+$   
 Expected m/z: 228.134  
 Observed m/z: 228.133  
 Mass Error (mDa): 1.0

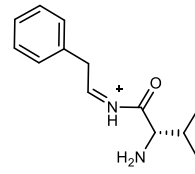

Chemical Formula:  $C_{13}H_{19}N_2O^+$   
 Expected m/z: 219.149  
 Observed m/z: 219.148  
 Mass Error (mDa): 1.0

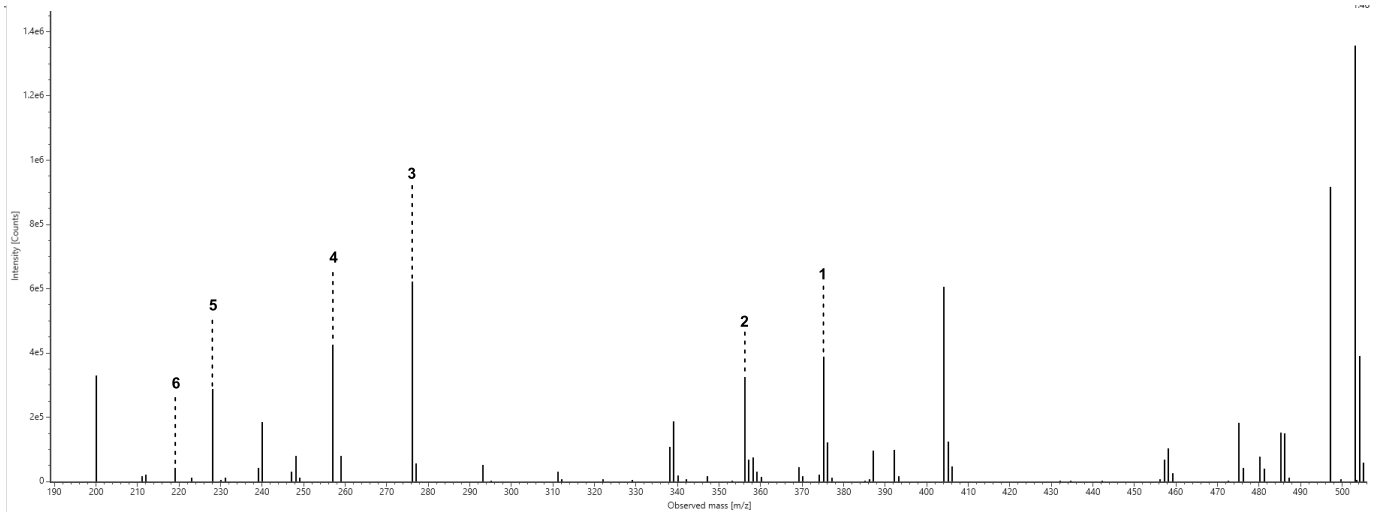

# Supplementary Fig. 70: MS2 spectrum for Cyclic Peptide 24 (Cyc24)

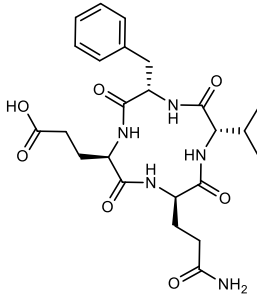

Chemical Formula:  $C_{24}H_{33}N_5O_7$   
 Expected Neutral Mass: 503.2380  
 Observed Neutral Mass: 503.2372  
 Mass Error (ppm): 1.6

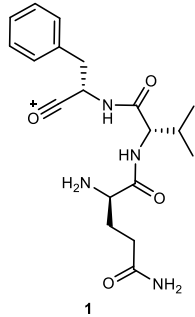

Chemical Formula:  $C_{19}H_{27}N_4O_4^+$   
 Expected m/z: 375.203  
 Observed m/z: 375.202  
 Mass Error (mDa): 1.0

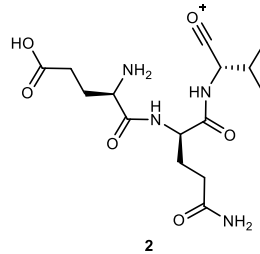

Chemical Formula:  $C_{15}H_{25}N_4O_6^+$   
 Expected m/z: 357.177  
 Observed m/z: 357.177  
 Mass Error (mDa): < 1.0

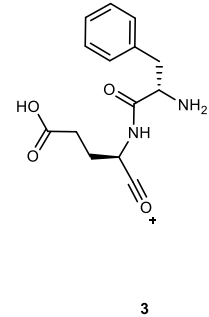

Chemical Formula:  $C_{14}H_{17}N_2O_4^+$   
 Expected m/z: 277.118  
 Observed m/z: 277.117  
 Mass Error (mDa): 1.0

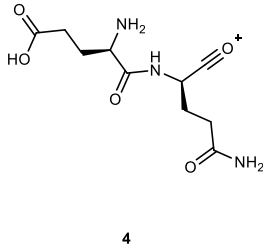

Chemical Formula:  $C_{10}H_{16}N_3O_5^+$   
 Expected m/z: 258.108  
 Observed m/z: 258.108  
 Mass Error (mDa): < 1.0

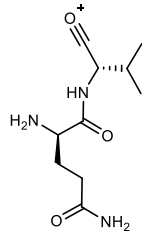

Chemical Formula:  $C_{10}H_{18}N_3O_3^+$   
 Expected m/z: 228.134  
 Observed m/z: 228.133  
 Mass Error (mDa): 1.0

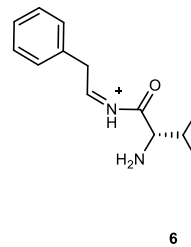

Chemical Formula:  $C_{13}H_{19}N_2O^+$   
 Expected m/z: 219.149  
 Observed m/z: 219.148  
 Mass Error (mDa): 1.0

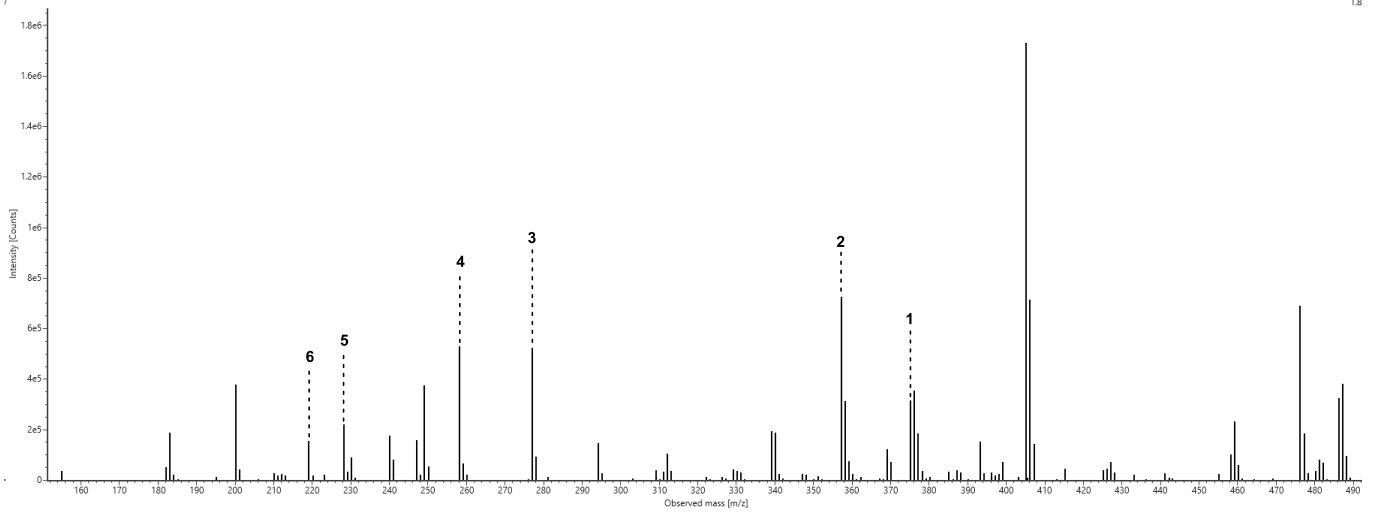

1.05

# Supplementary Fig. 71: MS2 spectrum for Cyclic Peptide 25 (Cyc25)

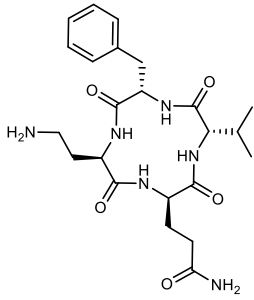

Chemical Formula:  $C_{23}H_{34}N_6O_5$   
 Expected Neutral Mass: 474.2590  
 Observed Neutral Mass: 474.2577  
 Mass Error (ppm): 2.9

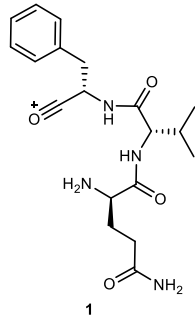

Chemical Formula:  $C_{19}H_{27}N_4O_4^+$   
 Expected m/z: 375.203  
 Observed m/z: 375.202  
 Mass Error (mDa): 1.0

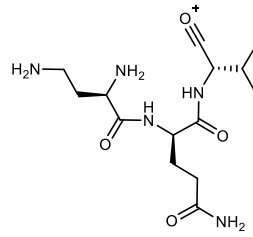

Chemical Formula:  $C_{14}H_{26}N_5O_4^+$   
 Expected m/z: 328.198  
 Observed m/z: 328.197  
 Mass Error (mDa): 1.0

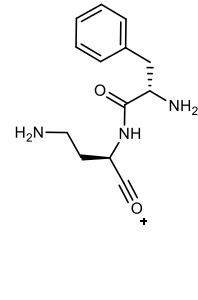

Chemical Formula:  $C_{13}H_{18}N_3O_2^+$   
 Expected m/z: 248.139  
 Observed m/z: 248.138  
 Mass Error (mDa): 1.0

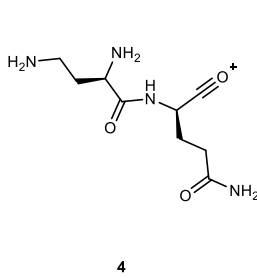

Chemical Formula:  $C_9H_{17}N_4O_3^+$   
 Expected m/z: 229.130  
 Observed m/z: 229.130  
 Mass Error (mDa): < 1.0

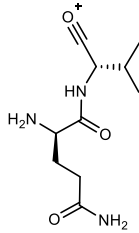

Chemical Formula:  $C_{10}H_{18}N_3O_3^+$   
 Expected m/z: 228.134  
 Observed m/z: 228.133  
 Mass Error (mDa): 1.0

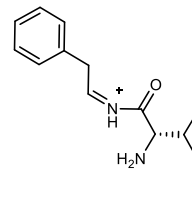

Chemical Formula:  $C_{13}H_{19}N_2O^+$   
 Expected m/z: 219.149  
 Observed m/z: 219.148  
 Mass Error (mDa): 1.0

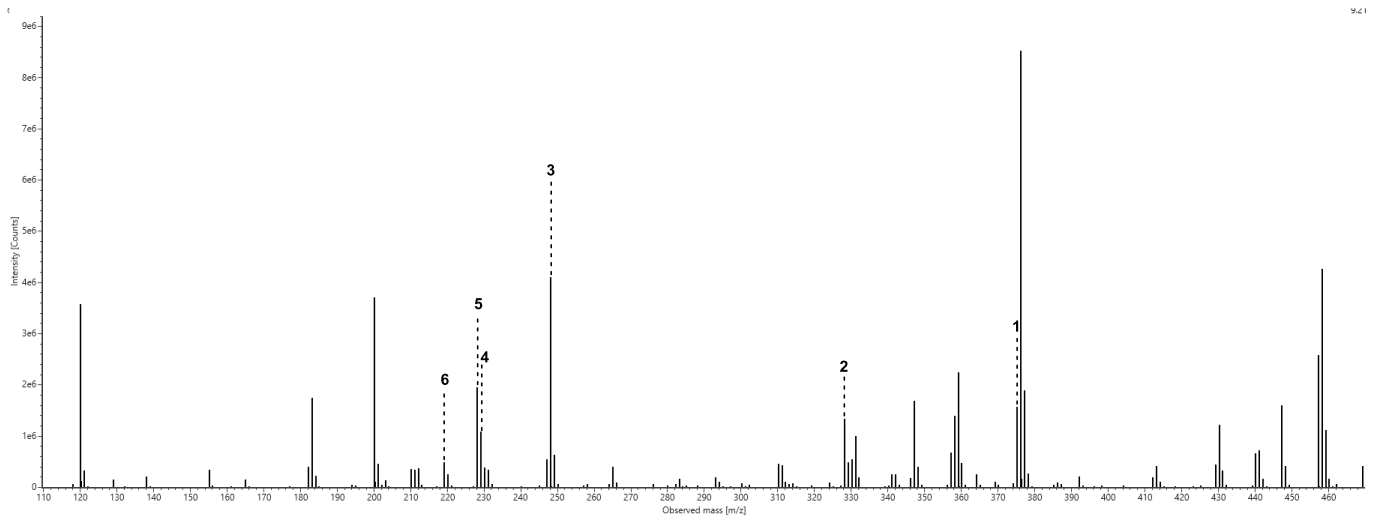

## Supplementary Fig. 72: MS2 spectrum for Cyclic Peptide 26 (Cyc26)

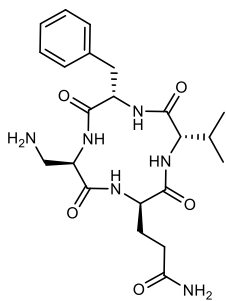

Chemical Formula:  $C_{22}H_{32}N_6O_5$   
 Expected Neutral Mass: 460.2434  
 Observed Neutral Mass: 460.2423  
 Mass Error (ppm): 2.3

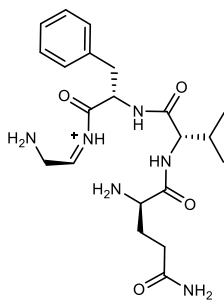

1  
 Chemical Formula:  $C_{21}H_{33}N_6O_4^+$   
 Expected m/z: 433.256  
 Observed m/z: 433.255  
 Mass Error (mDa): 1.0

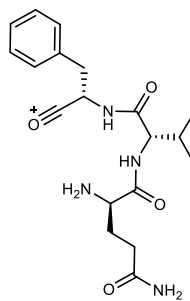

2  
 Chemical Formula:  $C_{19}H_{27}N_4O_4^+$   
 Expected m/z: 375.203  
 Observed m/z: 375.202  
 Mass Error (mDa): 1.0

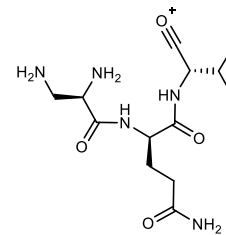

3  
 Chemical Formula:  $C_{13}H_{24}N_5O_4^+$   
 Expected m/z: 314.182  
 Observed m/z: 314.183  
 Mass Error (mDa): 1.0

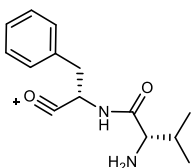

4  
 Chemical Formula:  $C_{14}H_{19}N_2O_2^+$   
 Expected m/z: 247.144  
 Observed m/z: 247.144  
 Mass Error (mDa): > 1.0

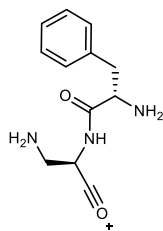

5  
 Chemical Formula:  $C_{12}H_{16}N_3O_2^+$   
 Expected m/z: 234.124  
 Observed m/z: 234.125  
 Mass Error (mDa): 1.0

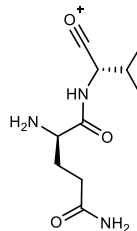

6  
 Chemical Formula:  $C_{10}H_{18}N_3O_3^+$   
 Expected m/z: 228.134  
 Observed m/z: 228.134  
 Mass Error (mDa): > 1.0

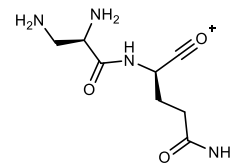

7  
 Chemical Formula:  $C_8H_{15}N_4O_3^+$   
 Expected m/z: 215.114  
 Observed m/z: 215.114  
 Mass Error (mDa): < 1.0

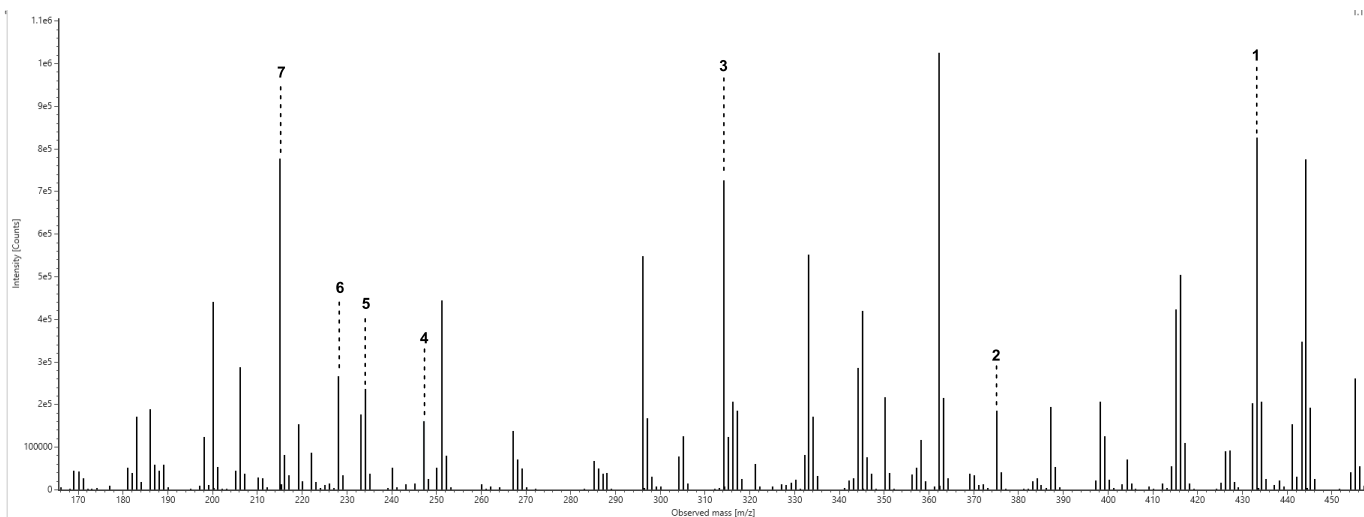

# Supplementary Fig. 73: MS2 spectrum for Cyclic Peptide 27 (Cyc27)

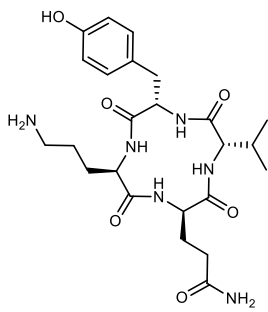

Chemical Formula:  $C_{24}H_{36}N_6O_6$   
 Expected Neutral Mass: 504.2696  
 Observed Neutral Mass: 504.2694  
 Mass Error (ppm): 0.5

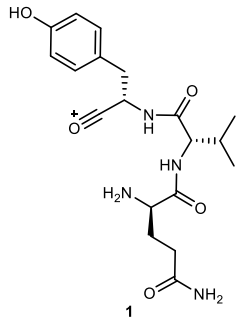

Chemical Formula:  $C_{19}H_{27}N_4O_5^+$   
 Expected m/z: 391.197  
 Observed m/z: 391.195  
 Mass Error (mDa): 2.0

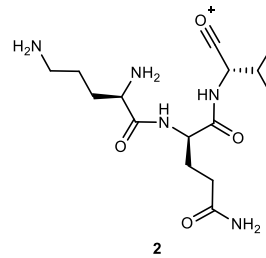

Chemical Formula:  $C_{15}H_{28}N_5O_4^+$   
 Expected m/z: 342.213  
 Observed m/z: 342.210  
 Mass Error (mDa): 3.0

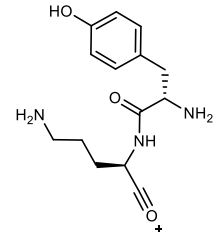

Chemical Formula:  $C_{14}H_{20}N_3O_3^+$   
 Expected m/z: 278.150  
 Observed m/z: 278.147  
 Mass Error (mDa): 3.0

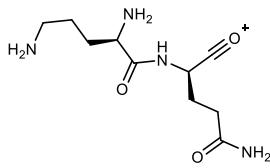

Chemical Formula:  $C_{10}H_{19}N_4O_3^+$   
 Expected m/z: 243.145  
 Observed m/z: 243.141  
 Mass Error (mDa): 4.0

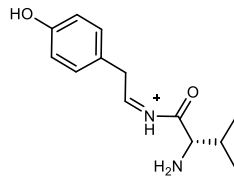

Chemical Formula:  $C_{13}H_{19}N_2O_2^+$   
 Expected m/z: 235.144  
 Observed m/z: 235.140  
 Mass Error (mDa): 4.0

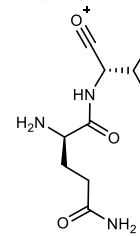

Chemical Formula:  $C_{10}H_{18}N_3O_3^+$   
 Expected m/z: 228.134  
 Observed m/z: 228.130  
 Mass Error (mDa): 4.0

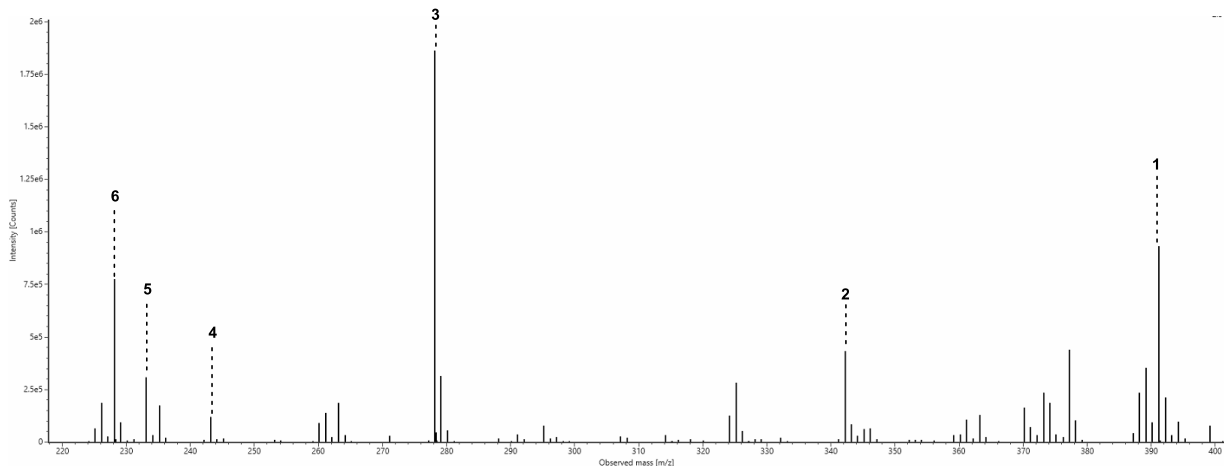

# Supplementary Fig. 74: MS2 spectrum for Cyclic Peptide 28 (Cyc28)

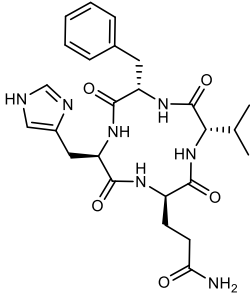

Chemical Formula:  $C_{25}H_{33}N_7O_5$   
 Expected Neutral Mass: 511.2543  
 Observed Neutral Mass: 511.2544  
 Mass Error (ppm): 0.2

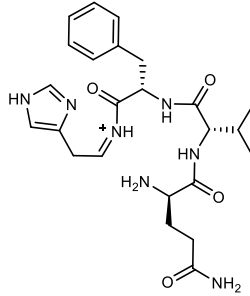

Chemical Formula:  $C_{24}H_{34}N_7O_4^+$   
 Expected m/z: 484.267  
 Observed m/z: 484.266  
 Mass Error (mDa): 1.0

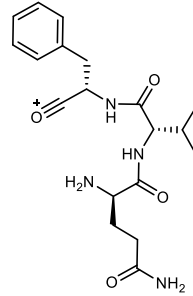

Chemical Formula:  $C_{19}H_{27}N_4O_4^+$   
 Expected m/z: 375.203  
 Observed m/z: 375.202  
 Mass Error (mDa): 1.0

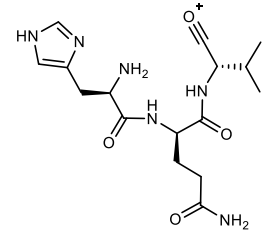

Chemical Formula:  $C_{16}H_{25}N_6O_4^+$   
 Expected m/z: 365.193  
 Observed m/z: 365.192  
 Mass Error (mDa): 1.0

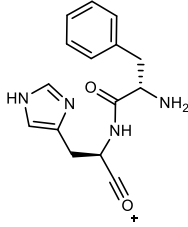

Chemical Formula:  $C_{15}H_{17}N_4O_2^+$   
 Expected m/z : 285.135  
 Observed m/z: 285.133  
 Mass Error (mDa): 2.0

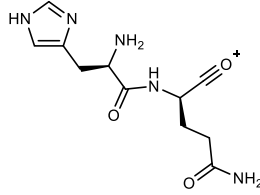

Chemical Formula:  $C_{11}H_{16}N_5O_3^+$   
 Expected m/z: 266.125  
 Observed m/z: 266.123  
 Mass Error (mDa): 1.0

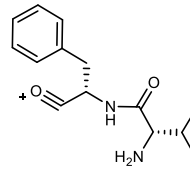

Chemical Formula:  $C_{14}H_{19}N_2O_2^+$   
 Expected m/z: 247.144  
 Observed m/z: 247.144  
 Mass Error (mDa): < 1.0

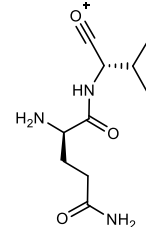

Chemical Formula:  $C_{10}H_{18}N_3O_3^+$   
 Expected m/z: 228.134  
 Observed m/z: 228.135  
 Mass Error (mDa): 1.0

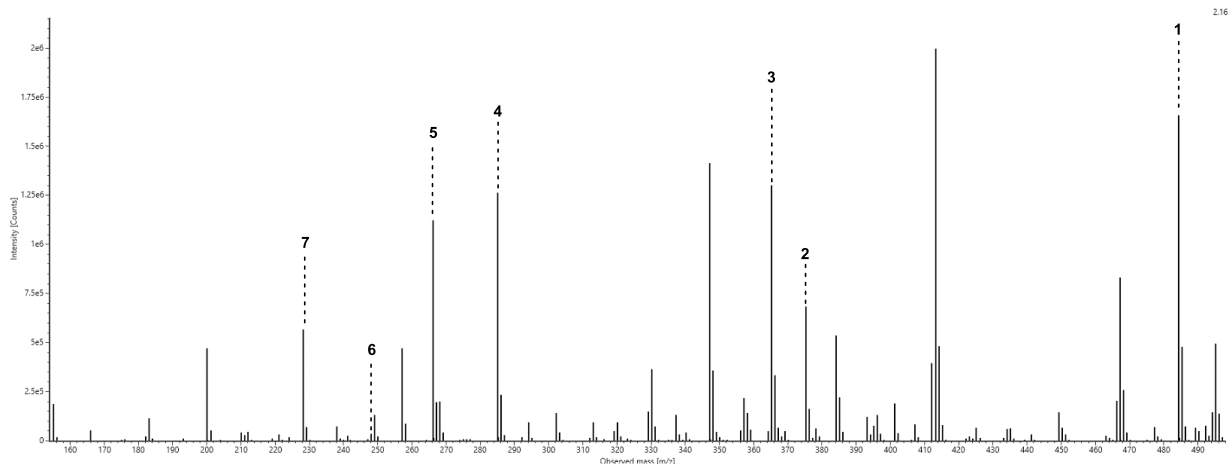



# Supplementary Fig. 75: MS2 spectrum for Cyclic Peptide 29 (Cyc29)

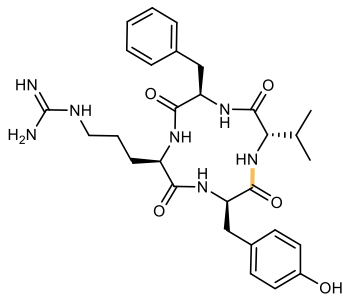

Chemical Formula:  $C_{29}H_{39}N_7O_5$   
 Expected Neutral Mass: 565.3012  
 Observed Neutral Mass: 565.3012  
 Mass Error (ppm): < 0.1

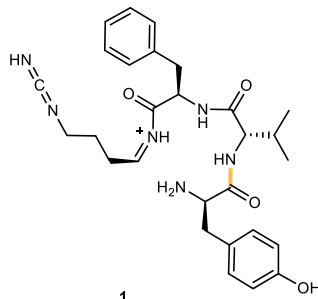

1  
 Chemical Formula:  $C_{28}H_{37}N_6O_4^+$   
 Expected m/z: 521.287  
 Observed m/z: 521.286  
 Mass Error (mDa): 1.0

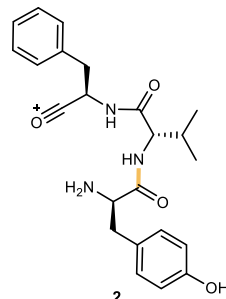

2  
 Chemical Formula:  $C_{23}H_{28}N_3O_4^+$   
 Expected m/z: 410.207  
 Observed m/z: 410.206  
 Mass Error (mDa): 1.0

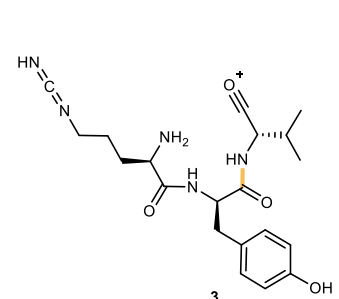

3  
 Chemical Formula:  $C_{20}H_{28}N_5O_4^+$   
 Expected m/z: 402.214  
 Observed m/z: 402.214  
 Mass Error (mDa): < 1.0

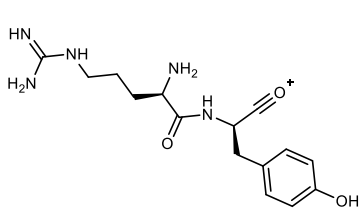

4  
 Chemical Formula:  $C_{15}H_{22}N_5O_3^+$   
 Expected m/z: 320.172  
 Observed m/z: 320.171  
 Mass Error (mDa): 1.0

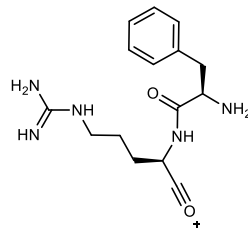

5  
 Chemical Formula:  $C_{15}H_{22}N_5O_2^+$   
 Expected m/z: 304.177  
 Observed m/z: 304.174  
 Mass Error (mDa): 3.0

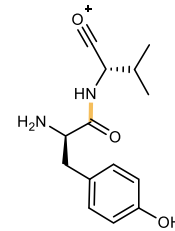

6  
 Chemical Formula:  $C_{14}H_{19}N_2O_3^+$   
 Expected m/z: 263.139  
 Observed m/z: 263.139  
 Mass Error (mDa): < 1.0

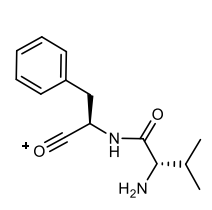

7  
 Chemical Formula:  $C_{14}H_{19}N_2O_2^+$   
 Expected m/z: 247.144  
 Observed m/z: 247.143  
 Mass Error (mDa): 1.0

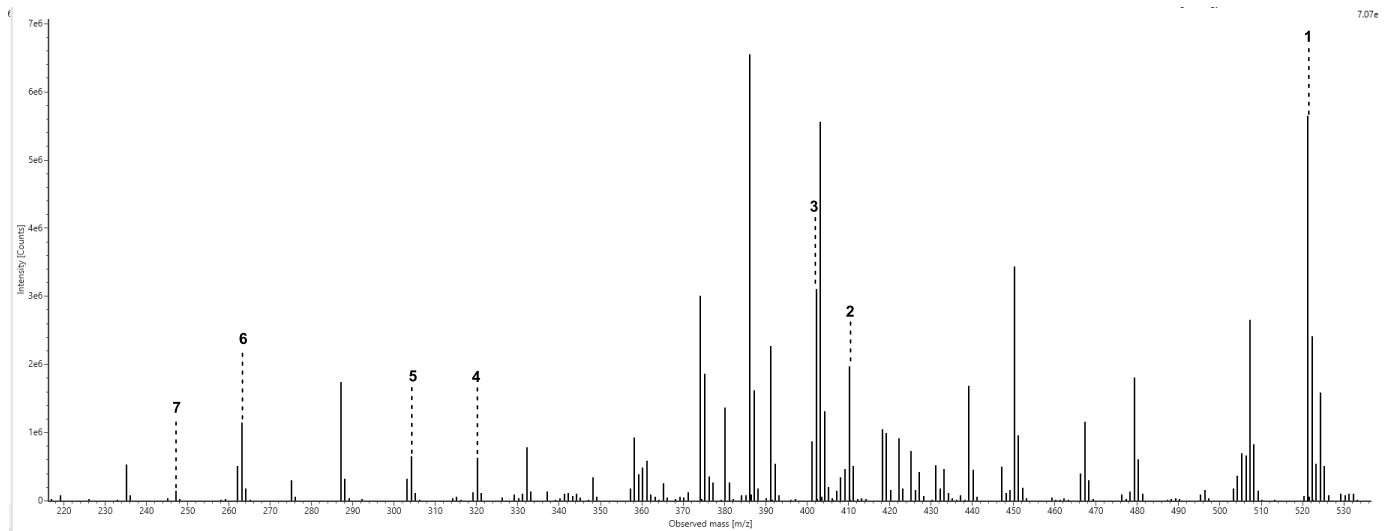

# Supplementary Fig. 76: MS2 spectrum for Cyclic Peptide 30 (Cyc30)

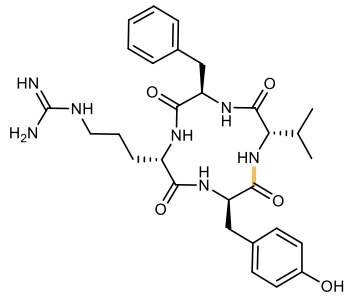

Chemical Formula:  $C_{29}H_{39}N_7O_5$   
 Expected Neutral Mass: 565.3012  
 Observed Neutral Mass: 565.3016  
 Mass Error (ppm): 0.5

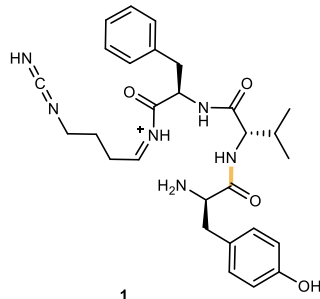

Chemical Formula:  $C_{28}H_{37}N_6O_4^+$   
 Expected m/z: 521.287  
 Observed m/z: 521.286  
 Mass Error (mDa): 1.0

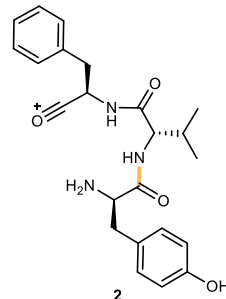

Chemical Formula:  $C_{23}H_{28}N_3O_4^+$   
 Expected m/z: 410.207  
 Observed m/z: 410.205  
 Mass Error (mDa): 2.0

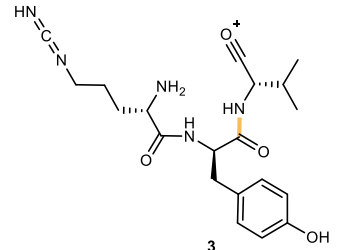

Chemical Formula:  $C_{20}H_{28}N_5O_4^+$   
 Expected m/z: 402.214  
 Observed m/z: 402.214  
 Mass Error (mDa): < 1.0

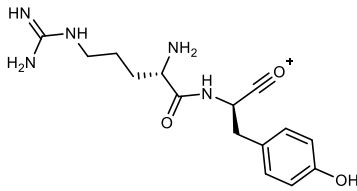

Chemical Formula:  $C_{15}H_{22}N_5O_3^+$   
 Expected m/z: 320.172  
 Observed m/z: 320.170  
 Mass Error (mDa): 2.0

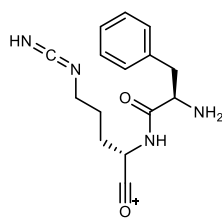

Chemical Formula:  $C_{15}H_{19}N_4O_2^+$   
 Expected m/z: 287.150  
 Observed m/z: 287.149  
 Mass Error (mDa): 1.0

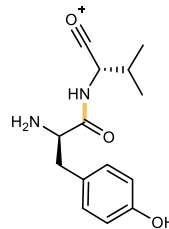

Chemical Formula:  $C_{14}H_{19}N_2O_3^+$   
 Expected m/z: 263.139  
 Observed m/z: 263.138  
 Mass Error (mDa): 1.0

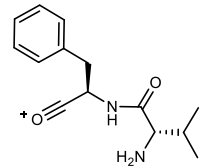

Chemical Formula:  $C_{14}H_{19}N_2O_2^+$   
 Expected m/z: 247.144  
 Observed m/z: 247.142  
 Mass Error (mDa): 2.0

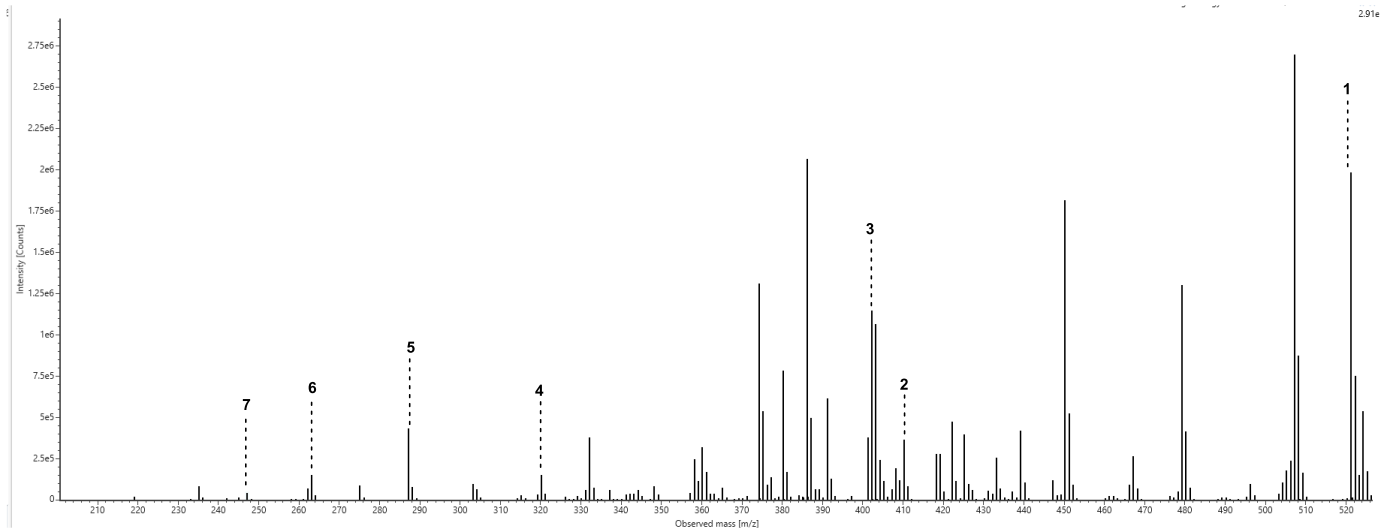

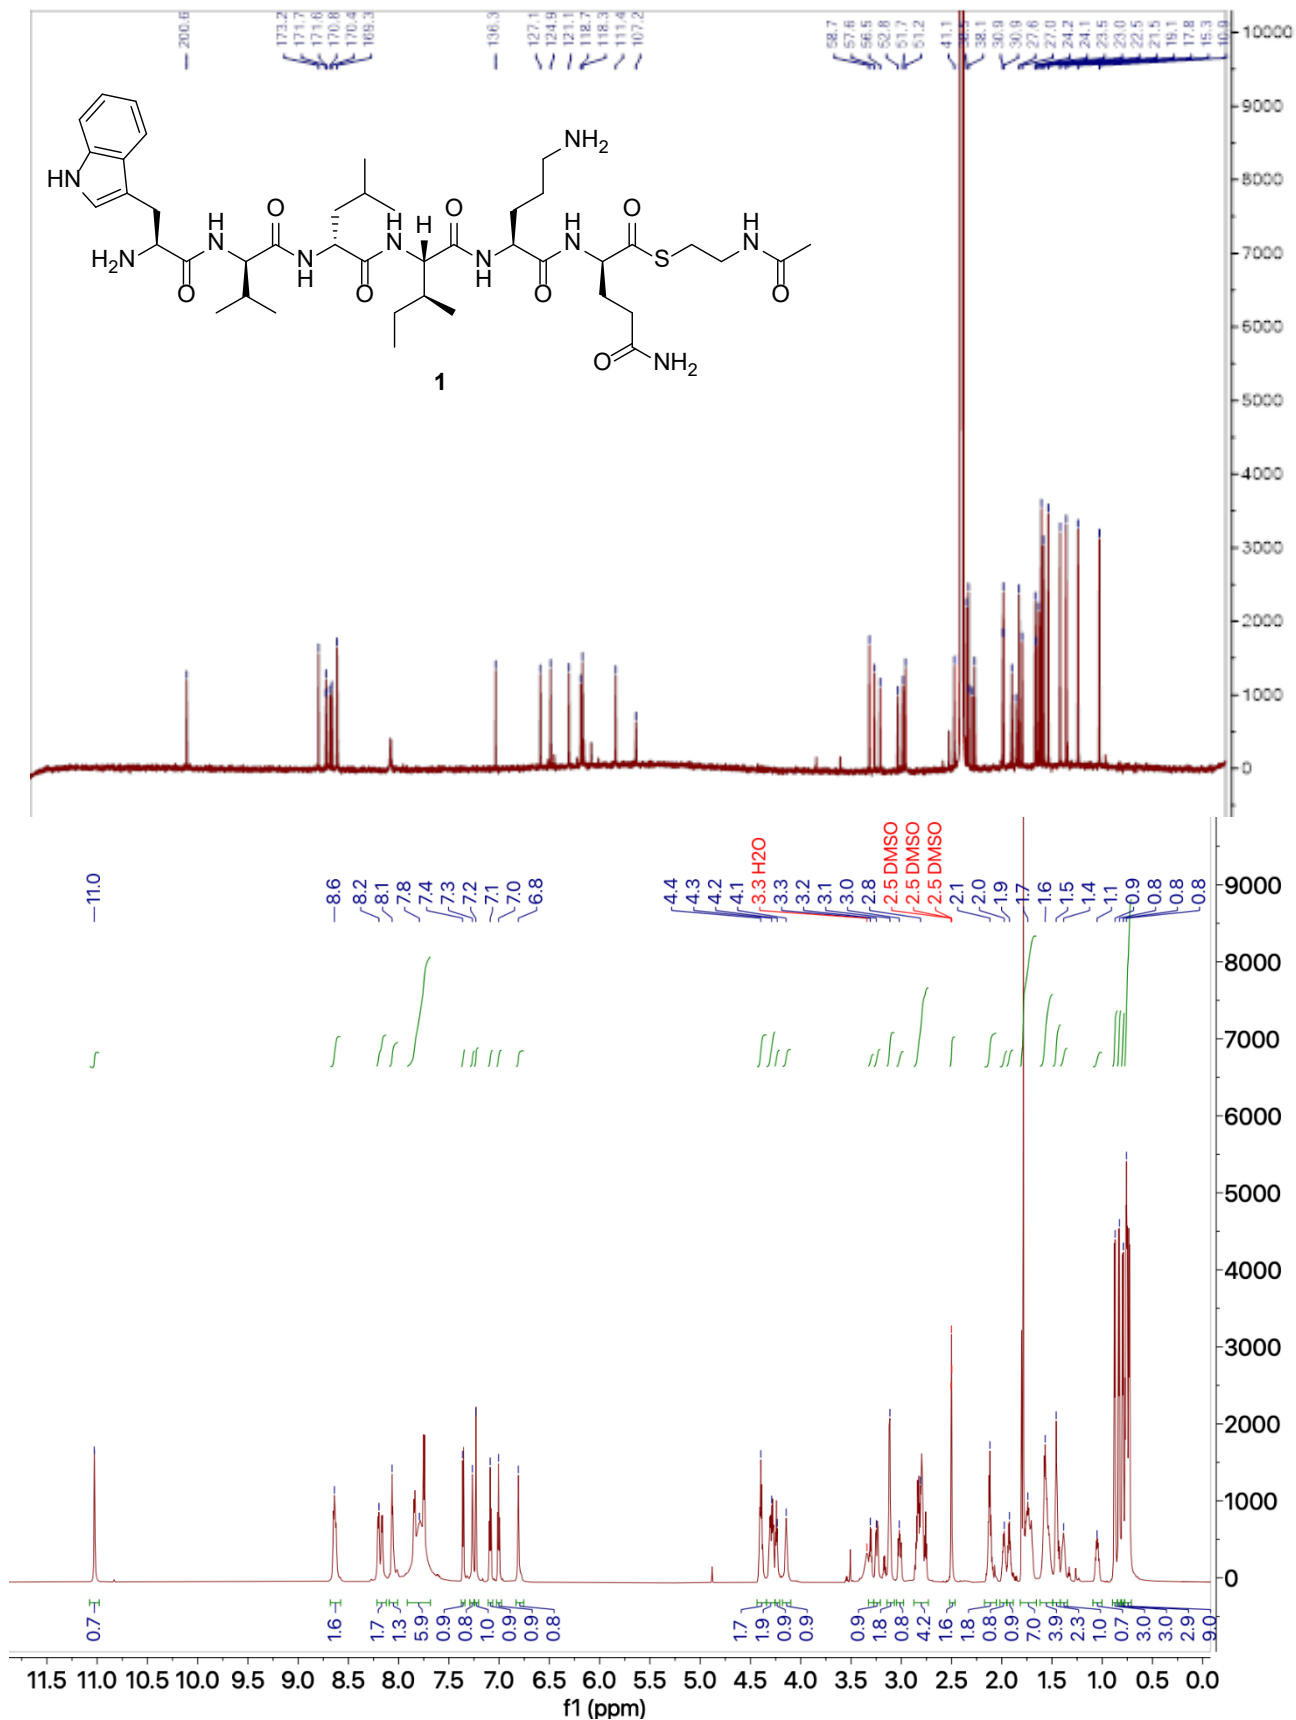

Supplementary Fig. 77: <sup>13</sup>C (201 MHz) and <sup>1</sup>H (800 MHz) NMR spectrum of UIm-SNAC (1) in DMSO-d<sub>6</sub>

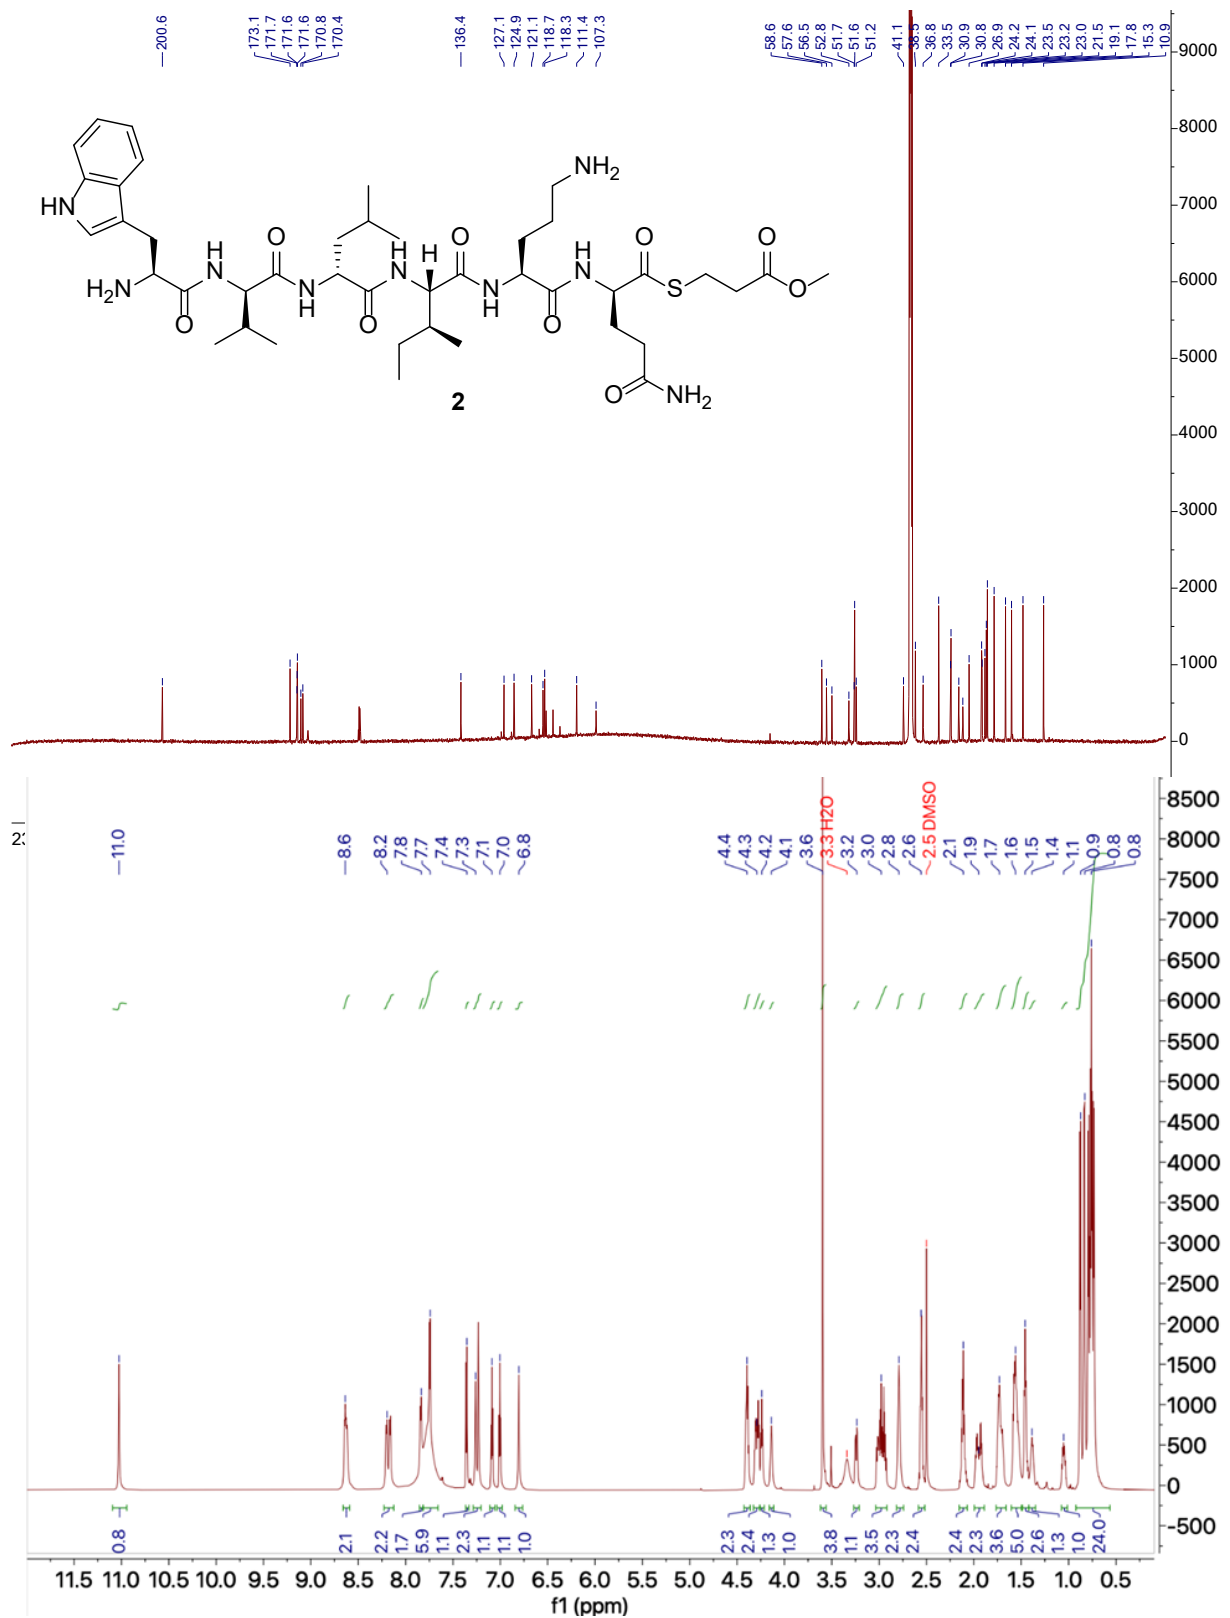

Supplementary Fig. 78: <sup>13</sup>C (201 MHz) and <sup>1</sup>H (800 MHz) NMR spectrum of **Uim-SMMP (2)** in DMSO-d<sub>6</sub>

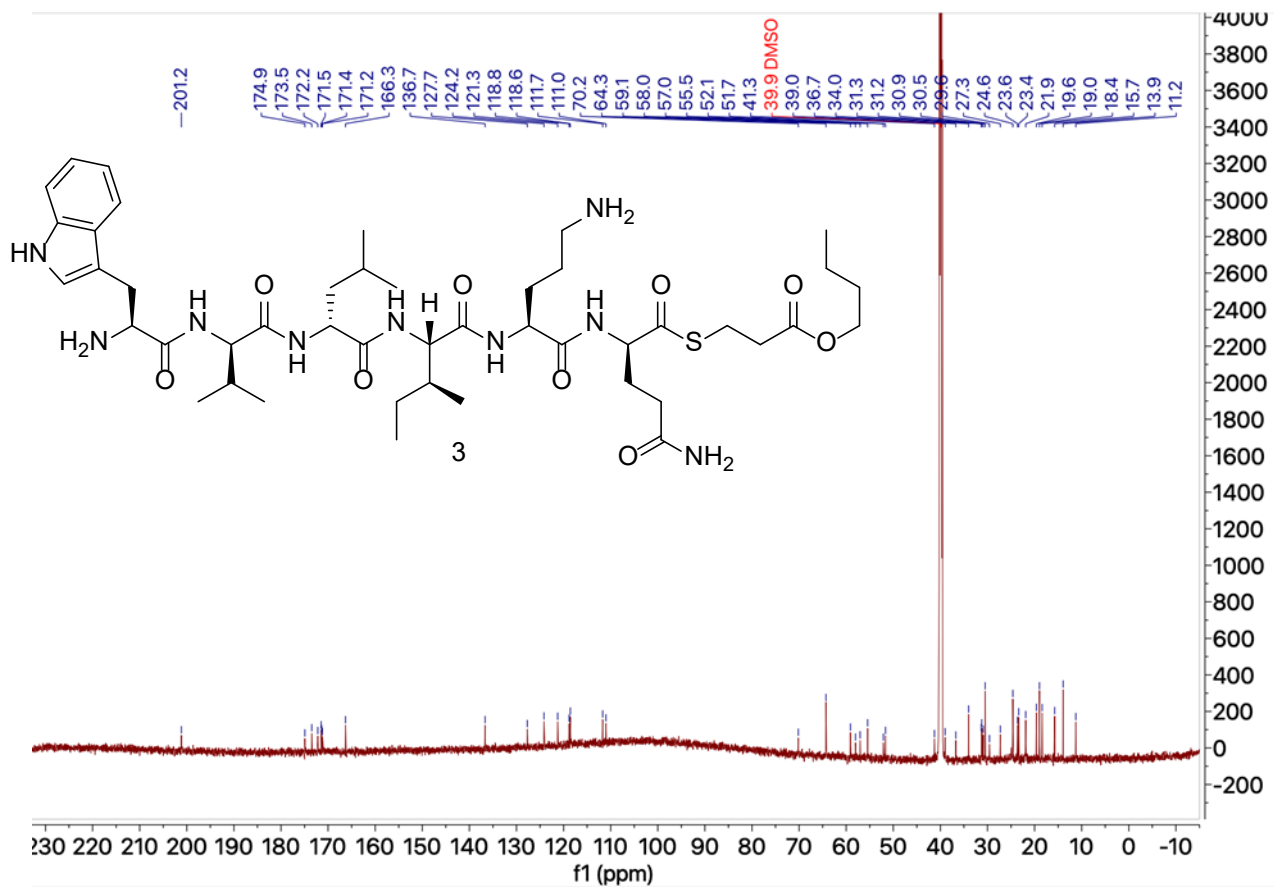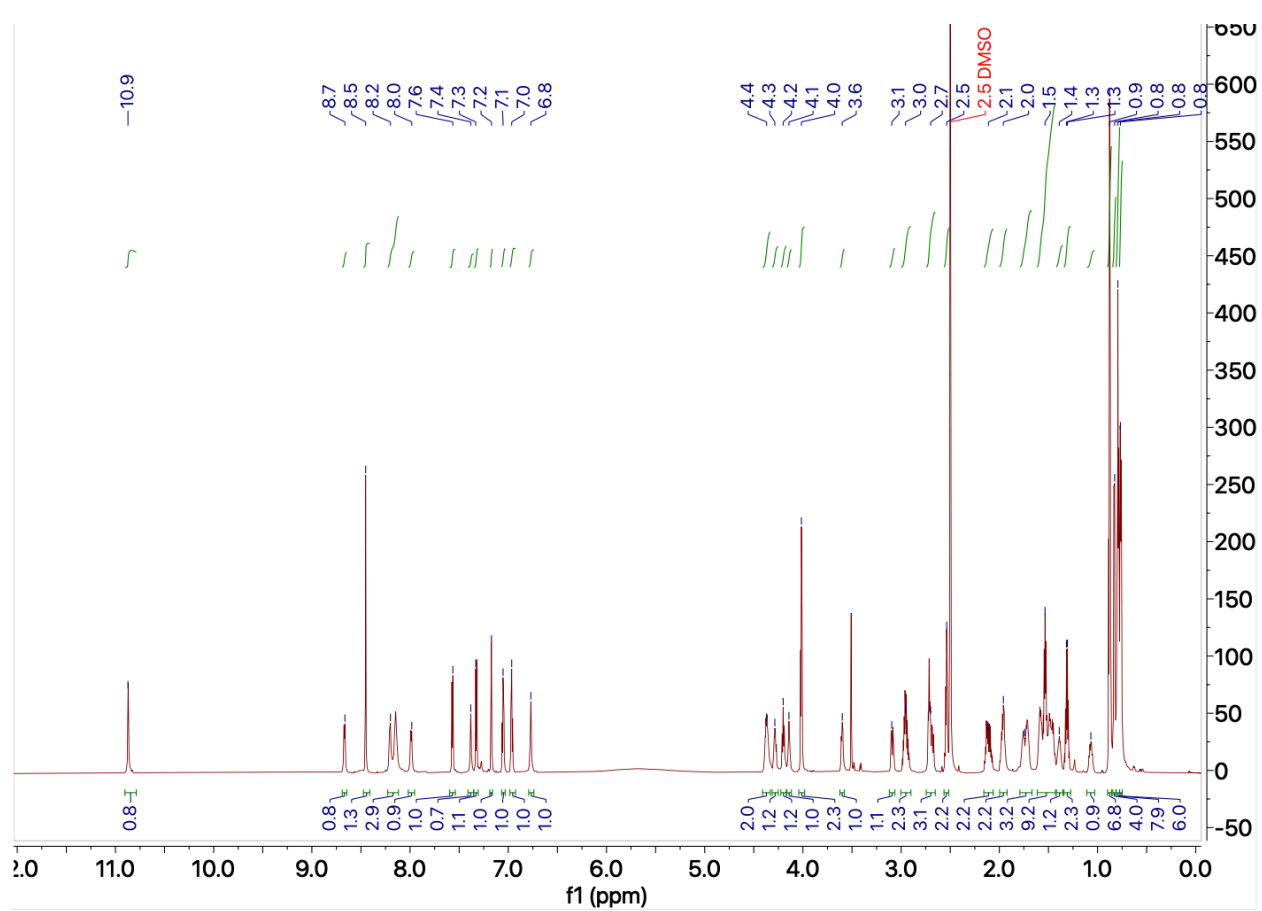

Supplementary Fig. 79: <sup>13</sup>C (201 MHz) and <sup>1</sup>H (800 MHz) NMR spectrum of **Ulm-SBMP (3)** in DMSO-d<sub>6</sub>

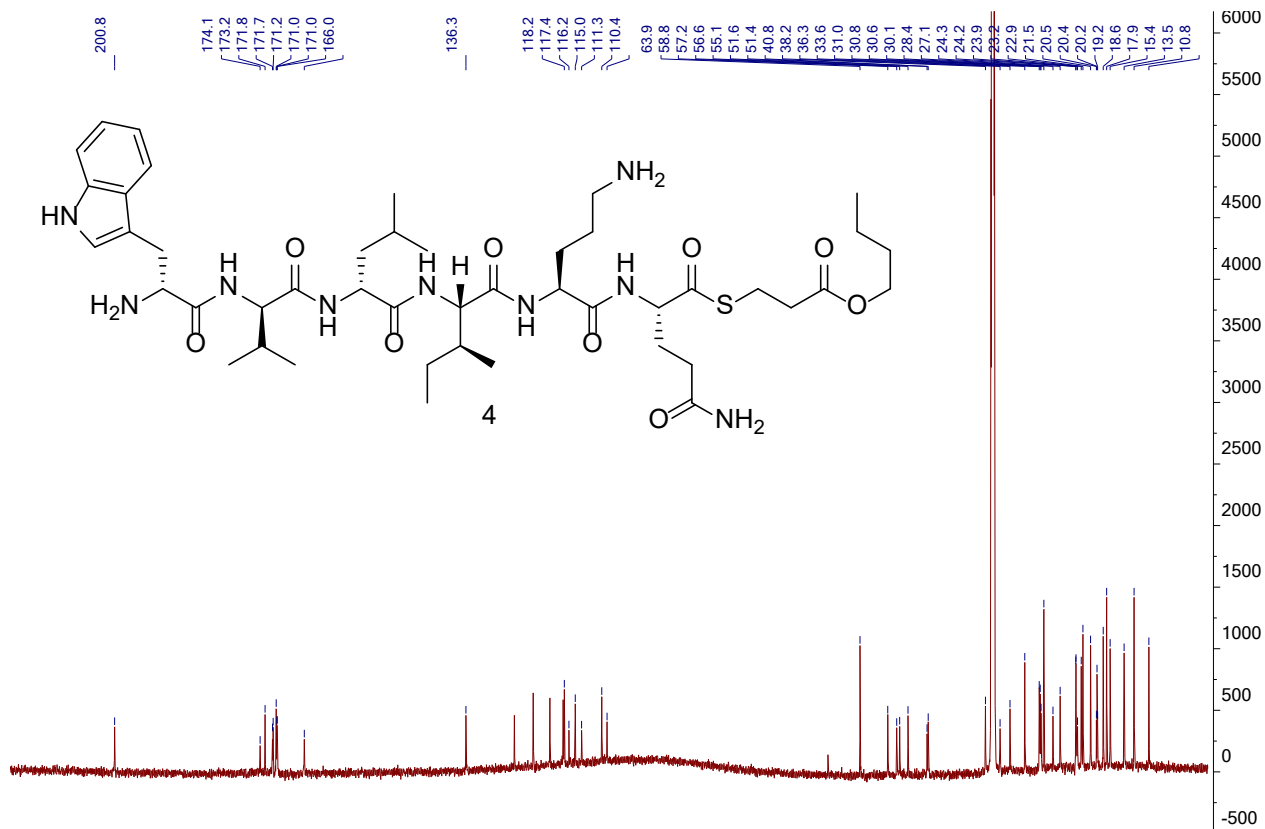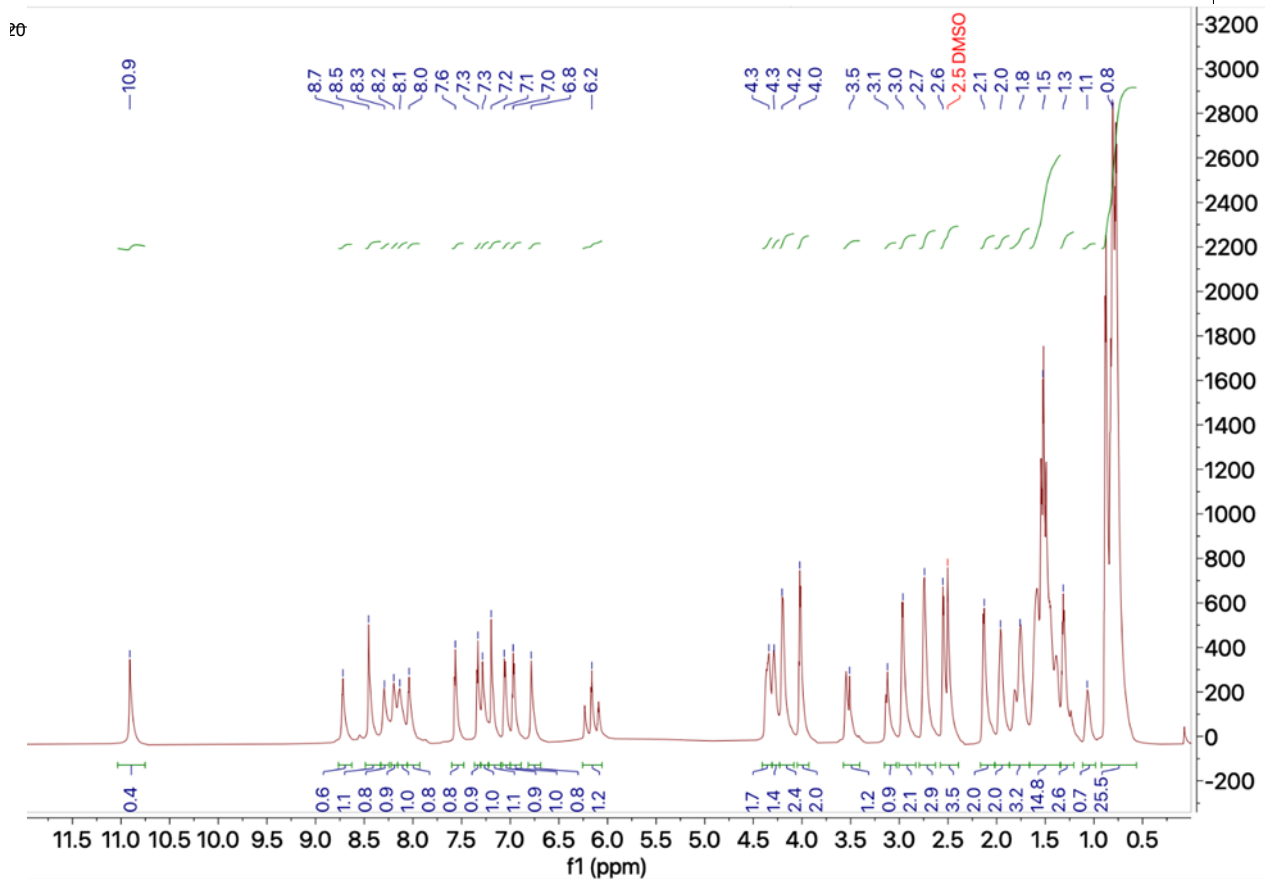

Supplementary Fig. 80: <sup>13</sup>C (201 MHz) and <sup>1</sup>H (800 MHz) NMR spectrum of 4 in DMSO-d<sub>6</sub>

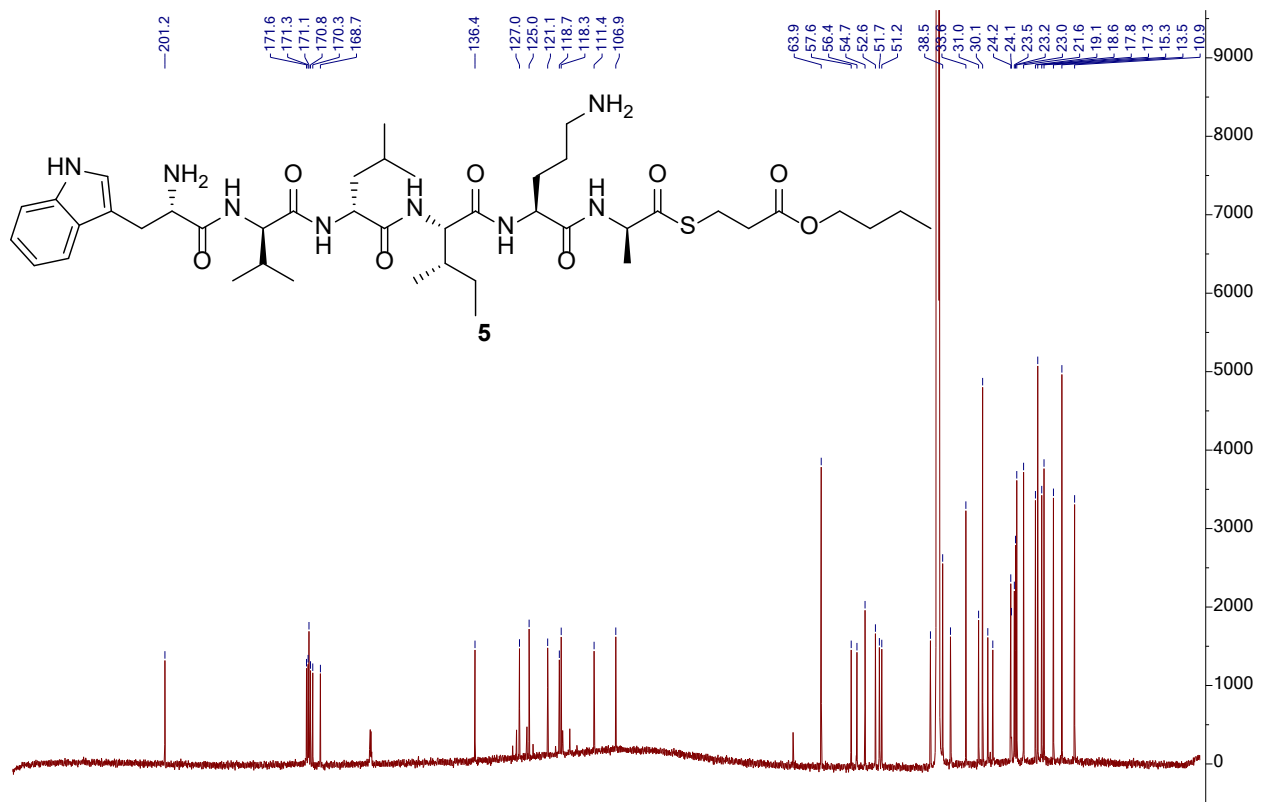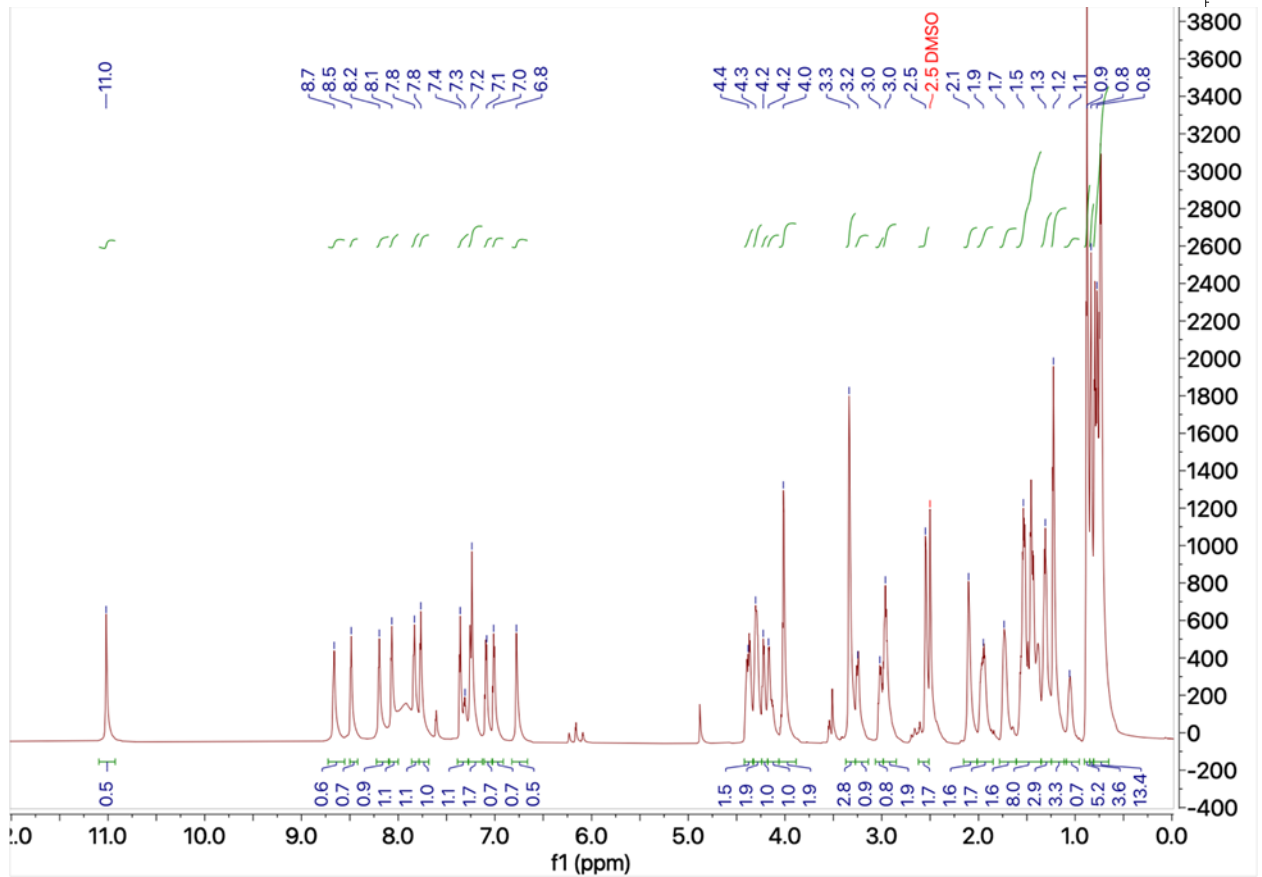

Supplementary Fig. 81: <sup>13</sup>C (201 MHz) and <sup>1</sup>H (800 MHz) NMR spectrum of **5** in DMSO-d<sub>6</sub>

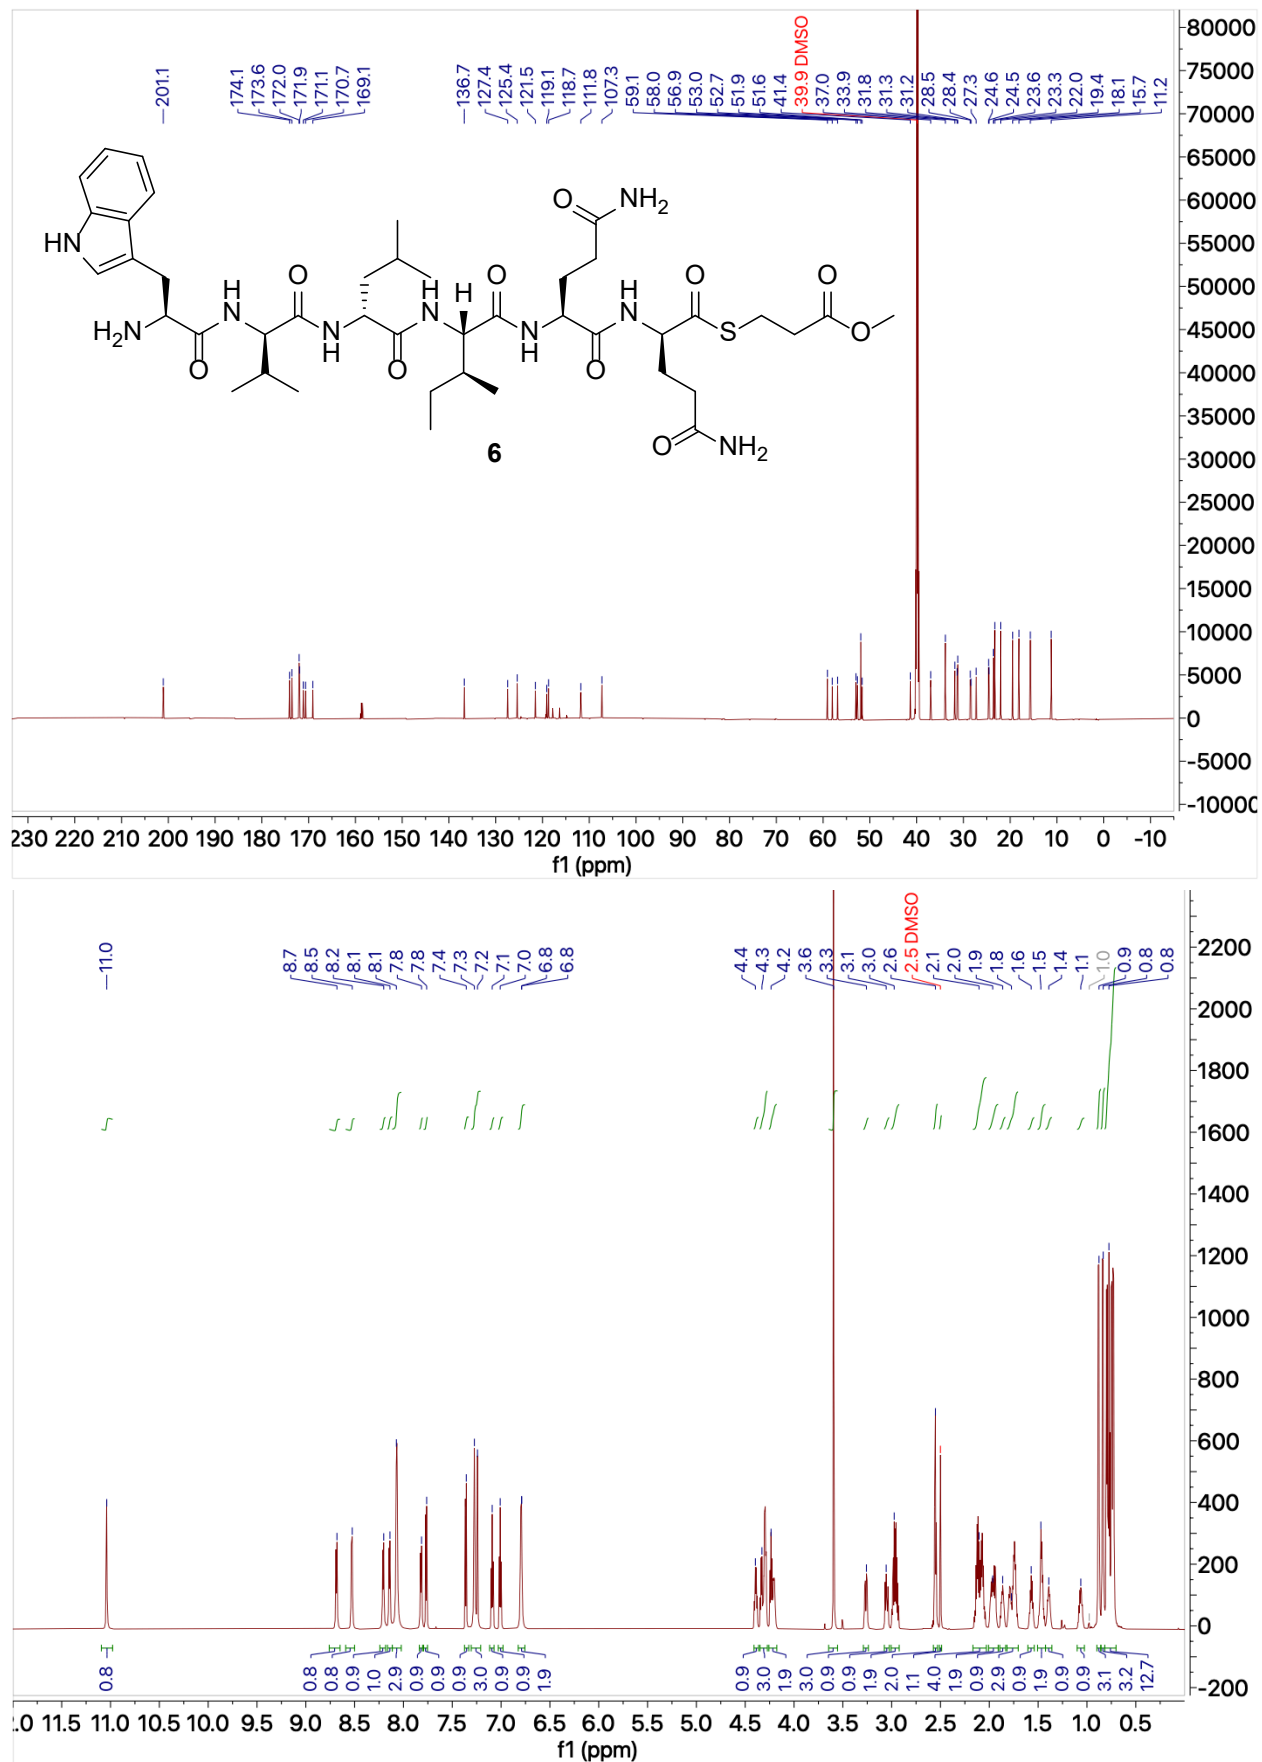

Supplementary Fig. 82: <sup>13</sup>C (201 MHz) and <sup>1</sup>H (800 MHz) NMR spectrum of 6 in DMSO-d<sub>6</sub>



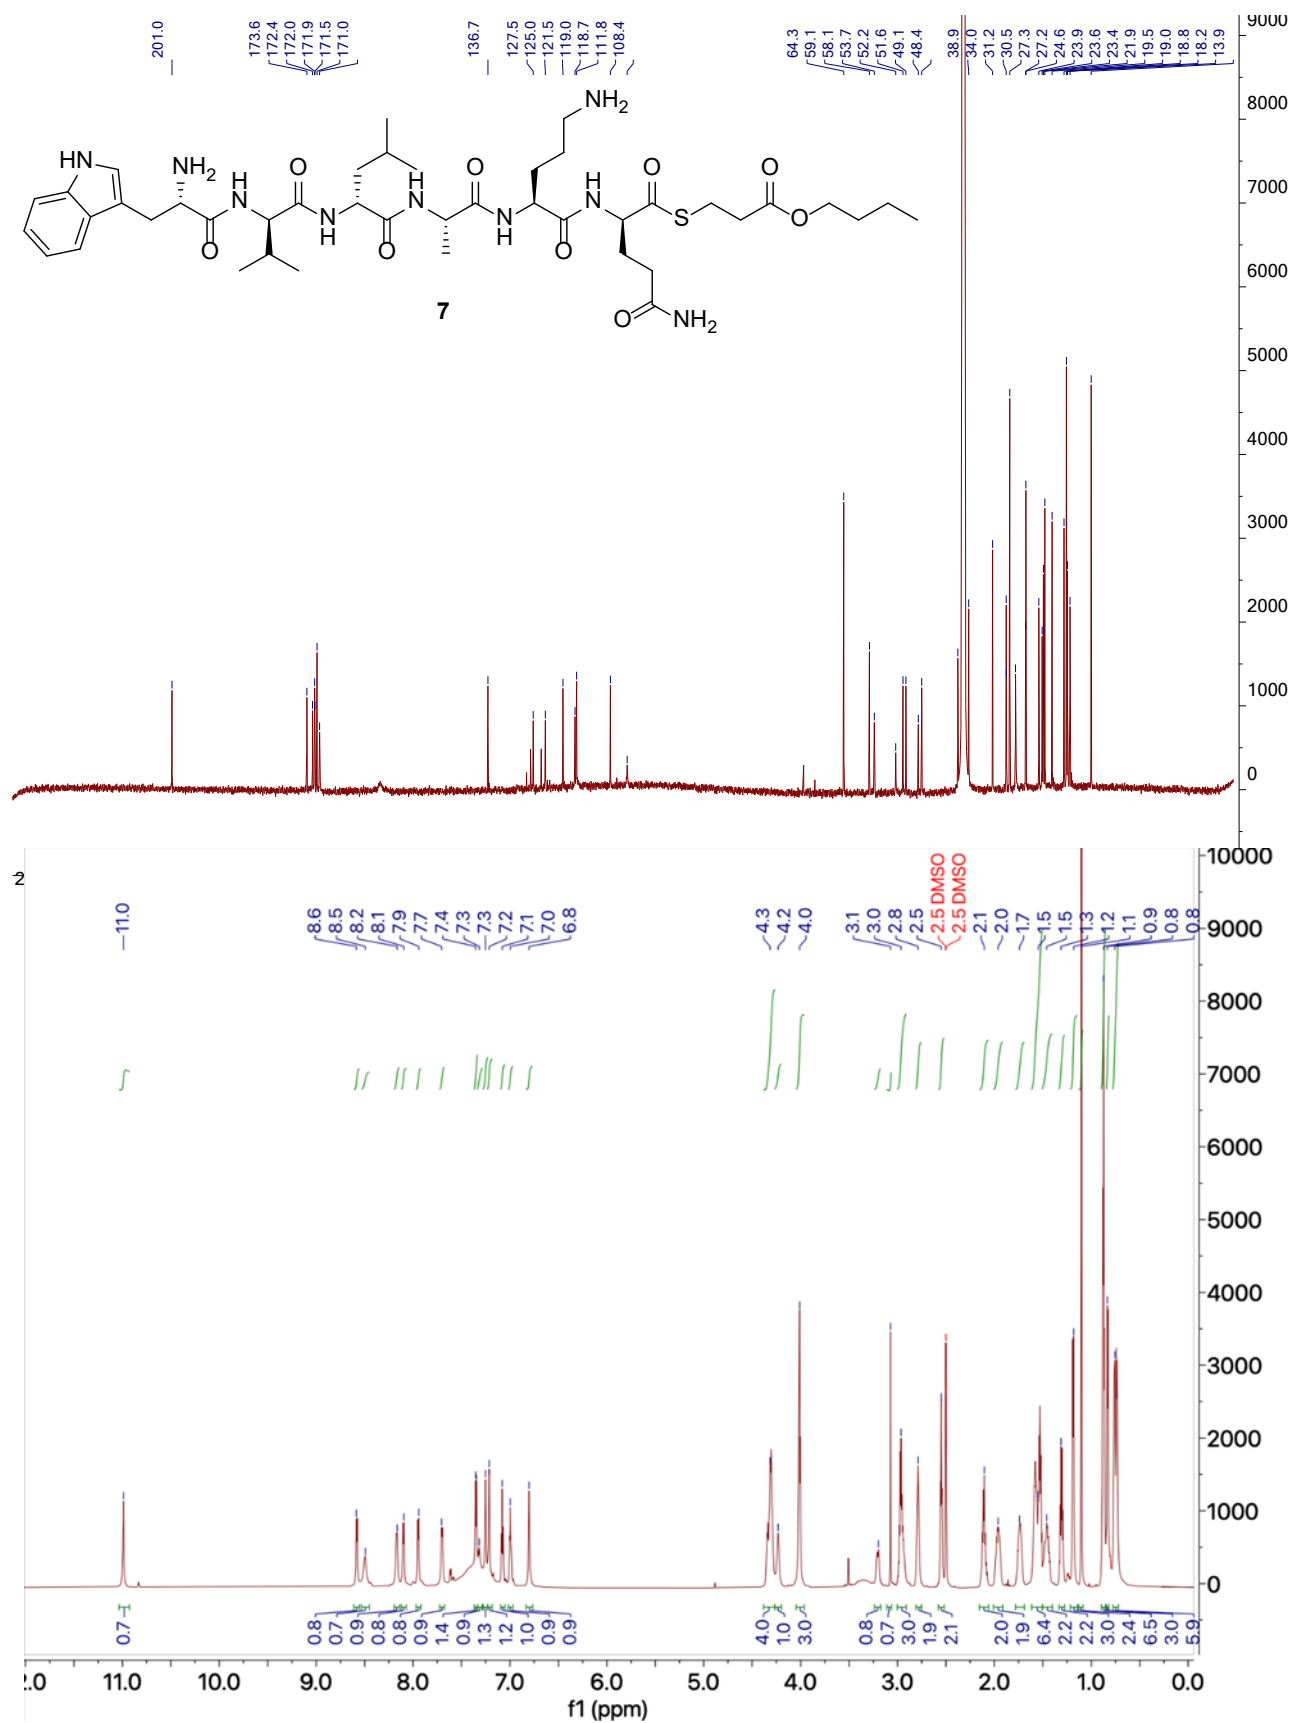

**Supplementary Fig. 83:** <sup>13</sup>C (201 MHz) and <sup>1</sup>H (800 MHz) NMR spectrum of 7 in DMSO-d<sub>6</sub>

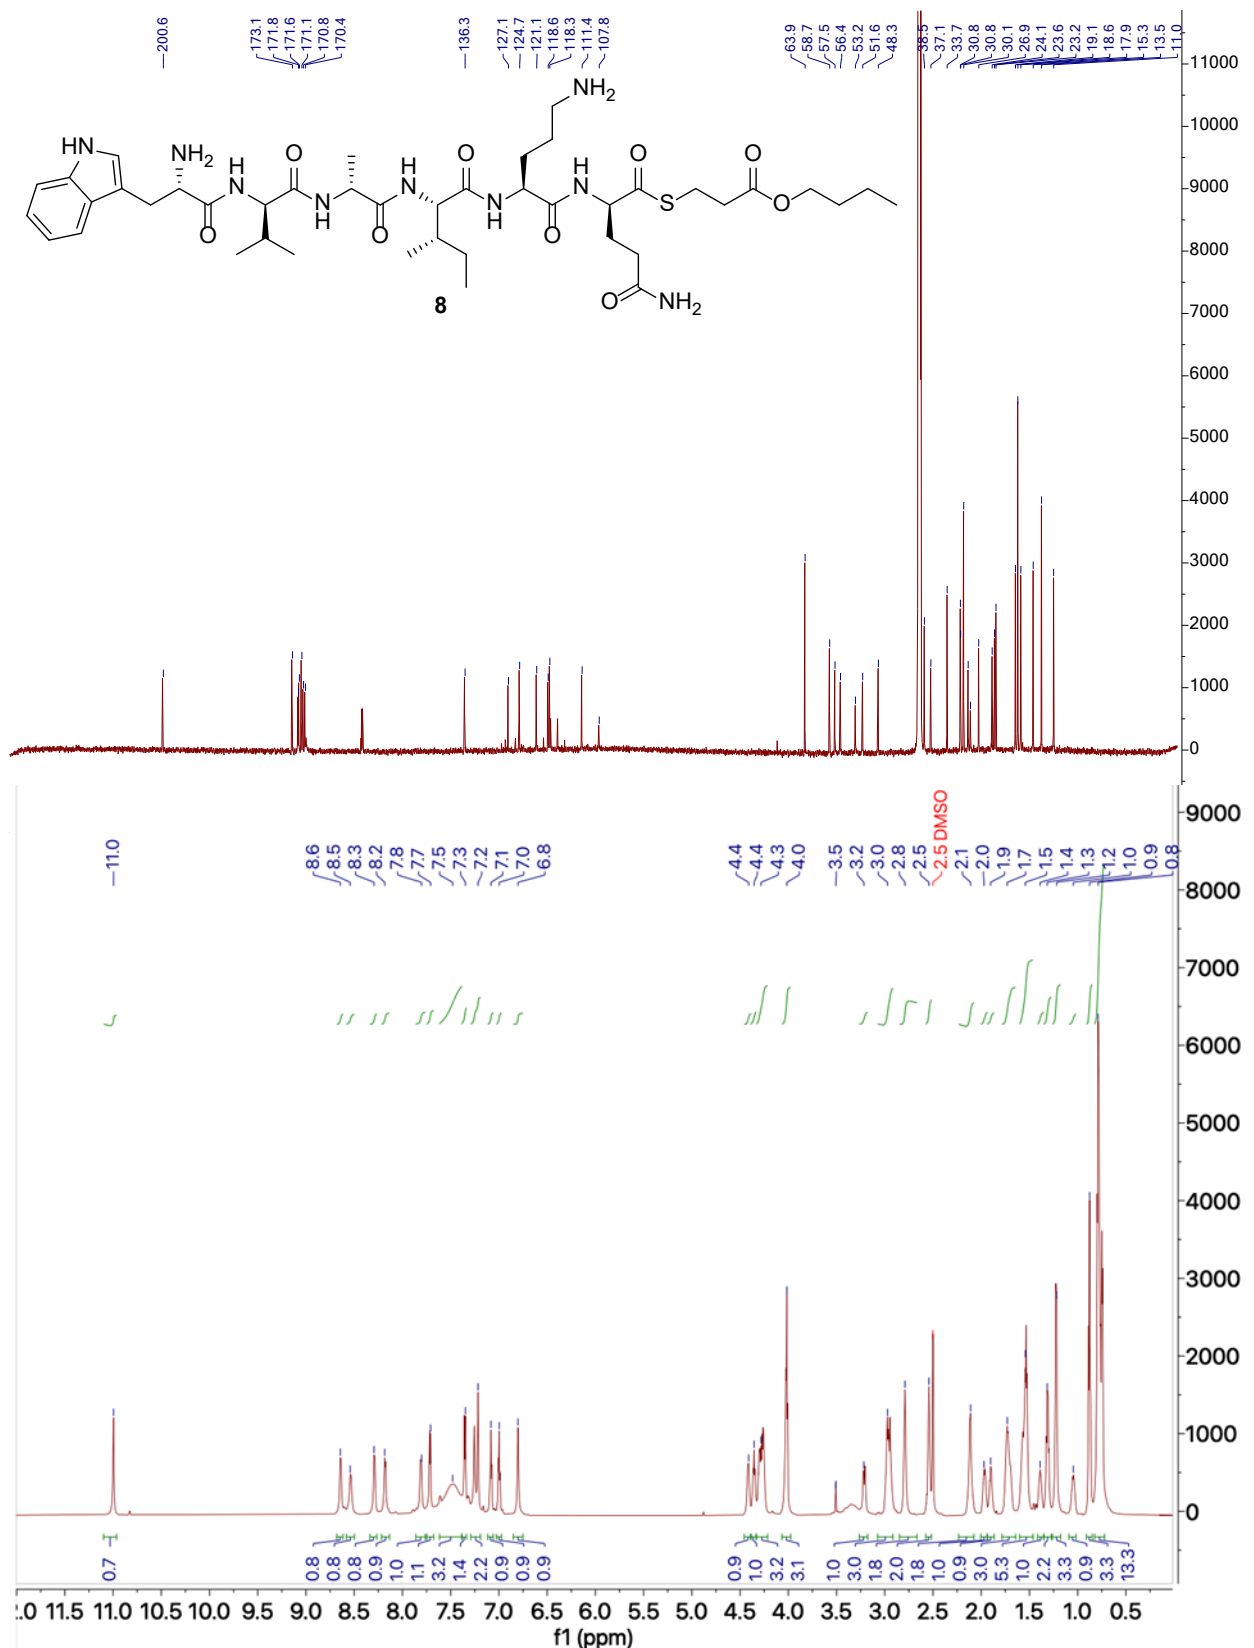

Supplementary Fig. 84: 13C (201 MHz) and 1H (800 MHz) NMR spectrum of 8 in DMSO-d6

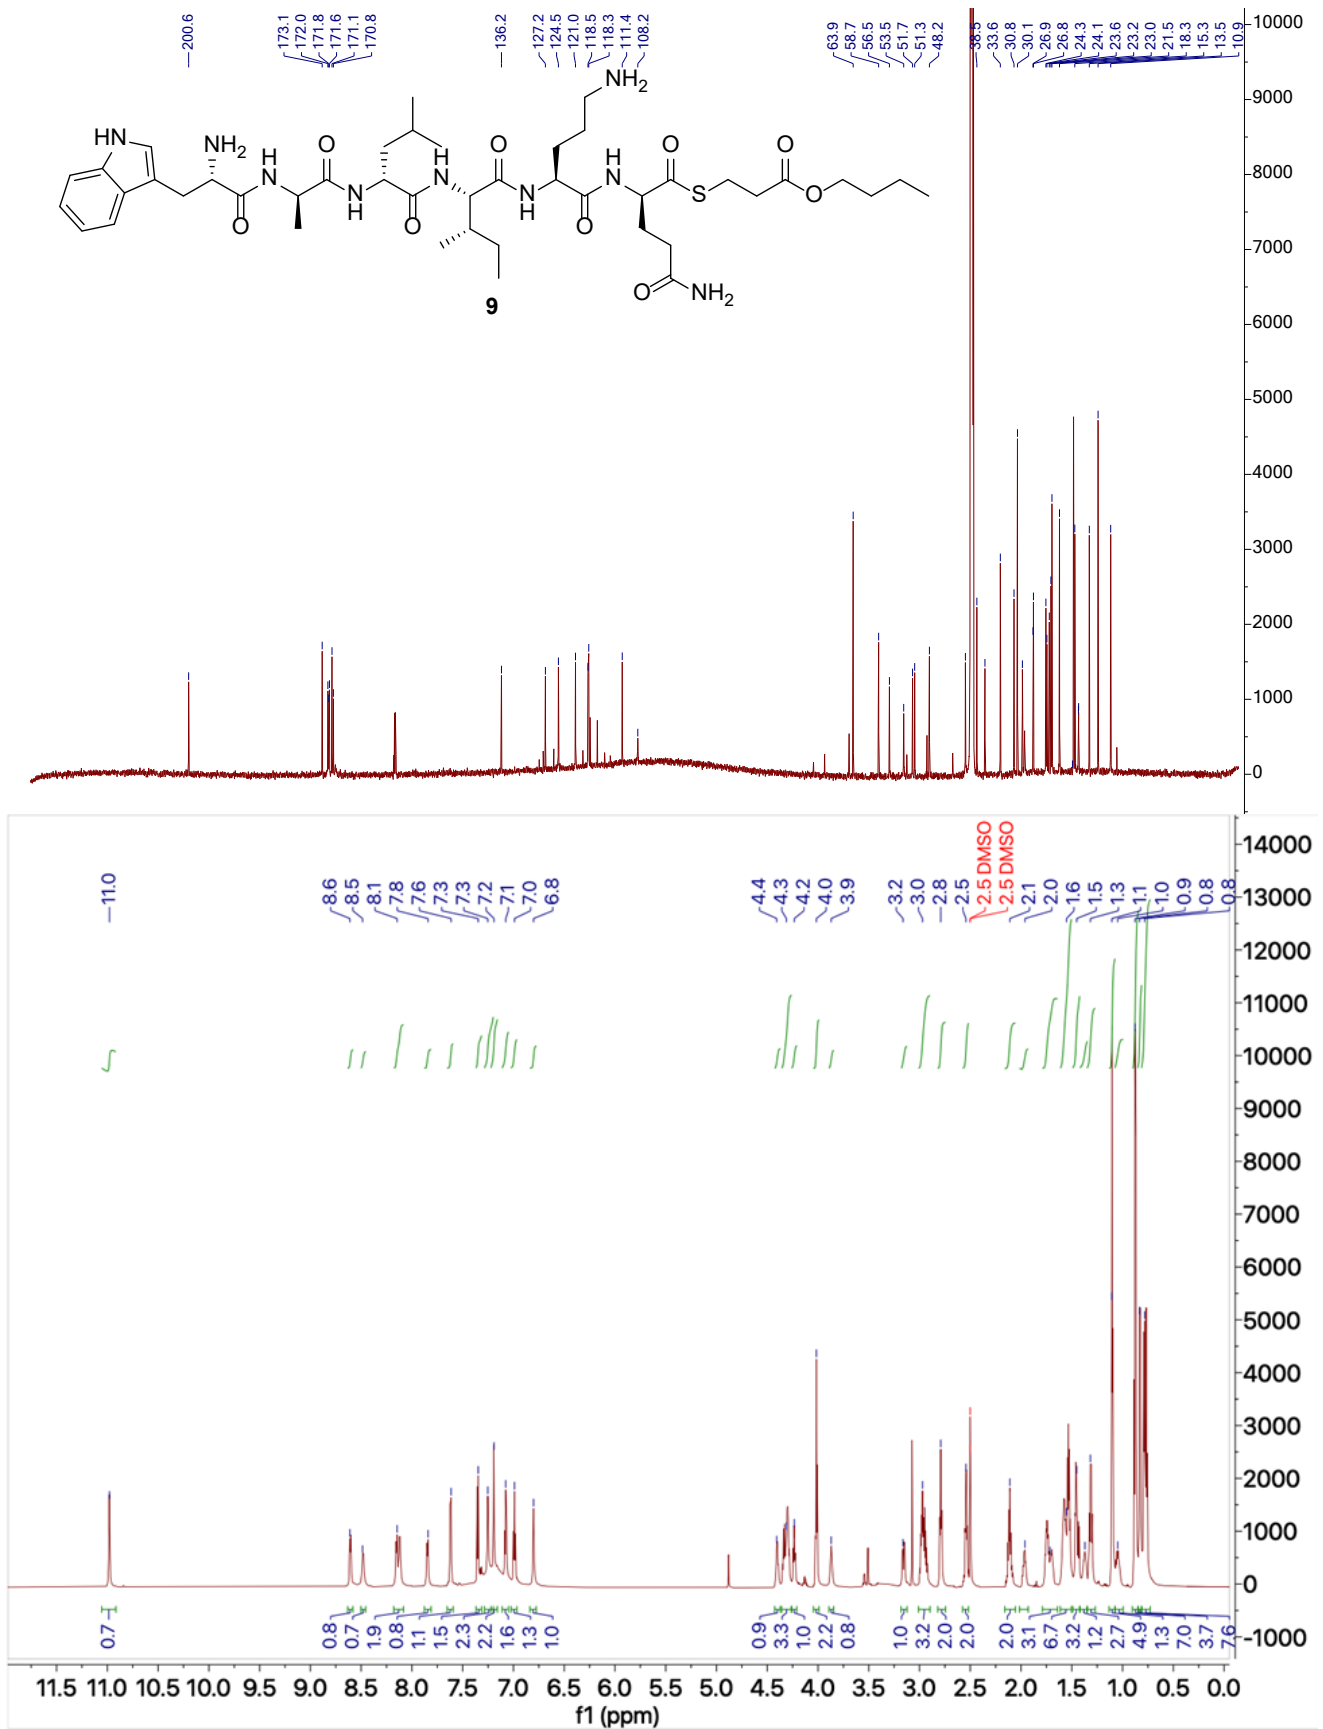

Supplementary Fig. 85: <sup>13</sup>C (201 MHz) and <sup>1</sup>H (800 MHz) NMR spectrum of **9** in DMSO-d<sub>6</sub>

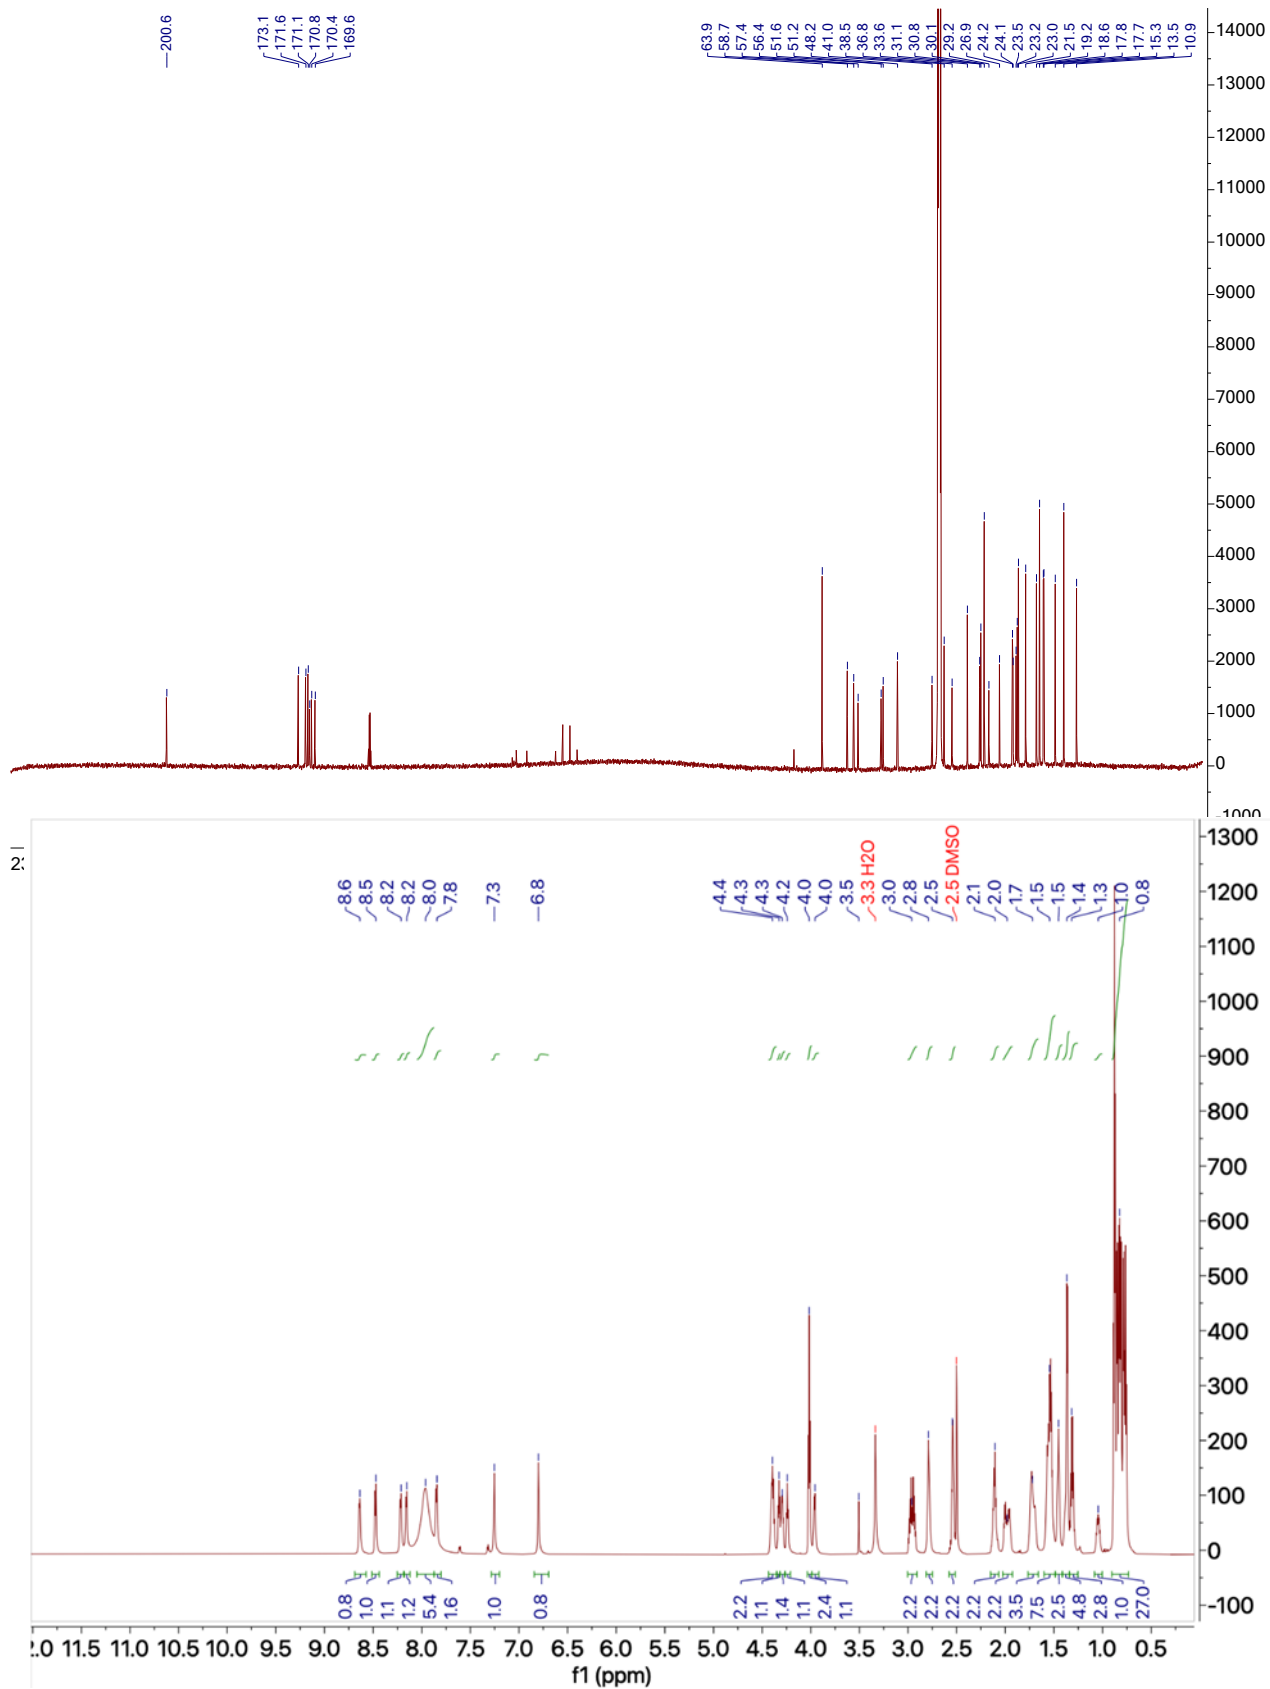

Supplementary Fig. 86: <sup>13</sup>C (201 MHz) and <sup>1</sup>H (800 MHz) NMR spectrum of **10** in DMSO-d<sub>6</sub>

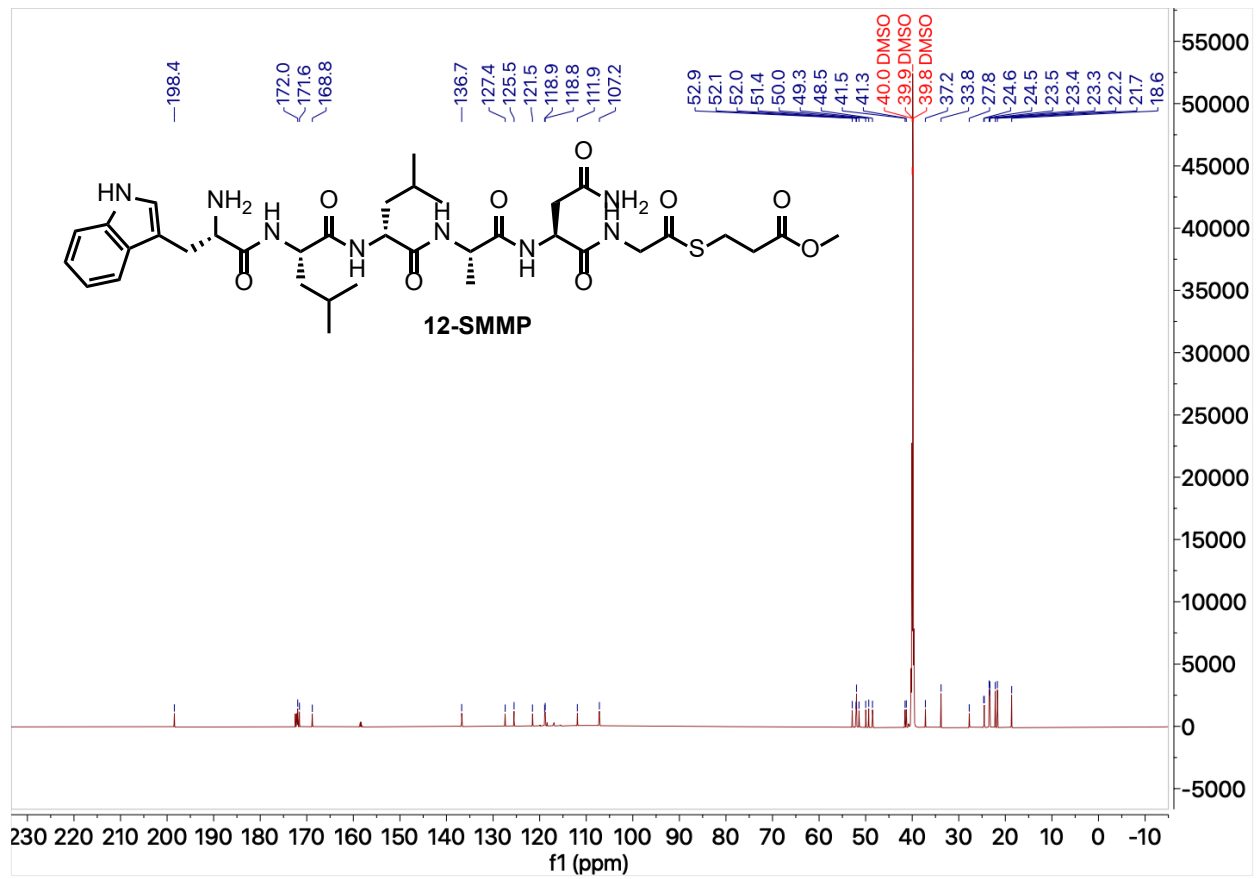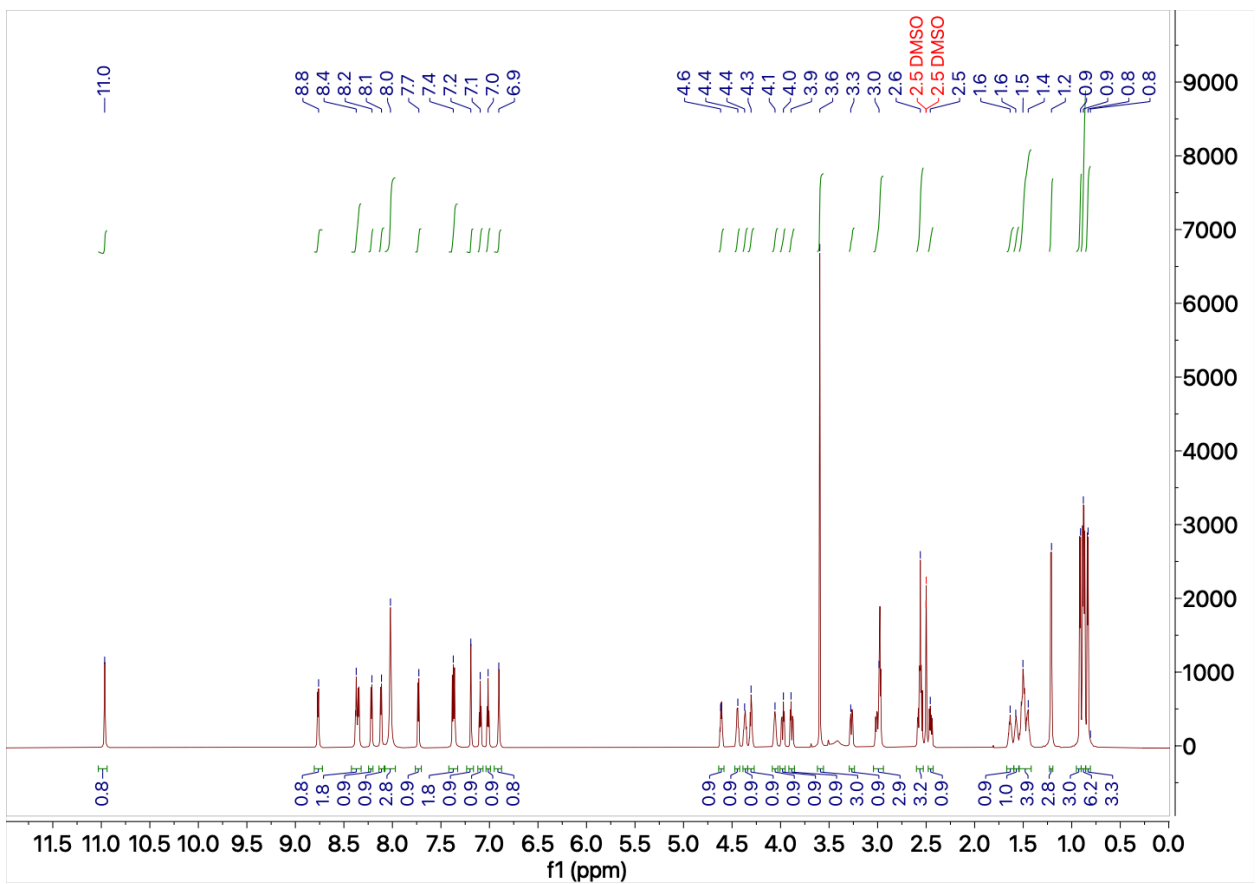

Supplementary Fig. 87: <sup>13</sup>C (201 MHz) and <sup>1</sup>H (800 MHz) NMR spectrum of **12-SMMP** in DMSO-d<sub>6</sub>

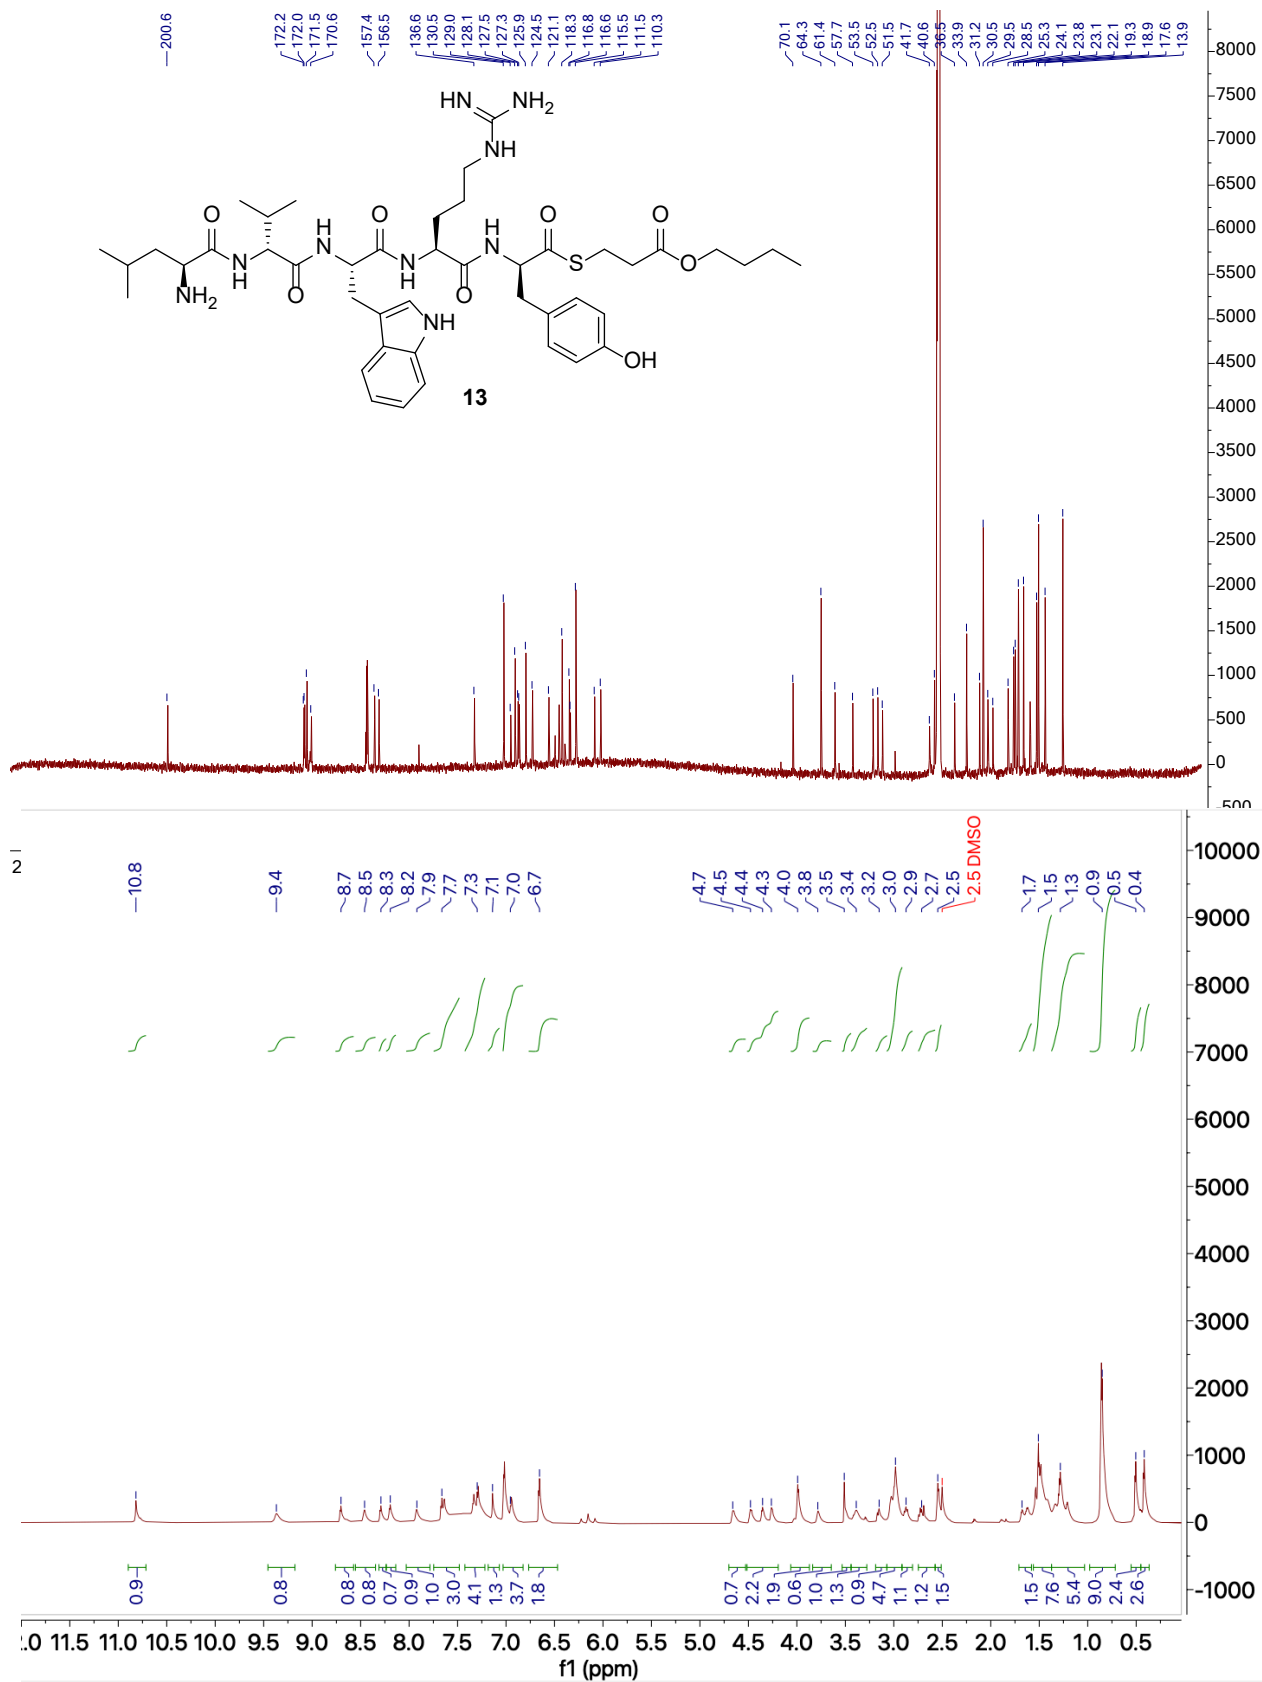

Supplementary Fig. 88: <sup>13</sup>C (201 MHz) and <sup>1</sup>H (800 MHz) NMR spectrum of **13** in DMSO-d<sub>6</sub>

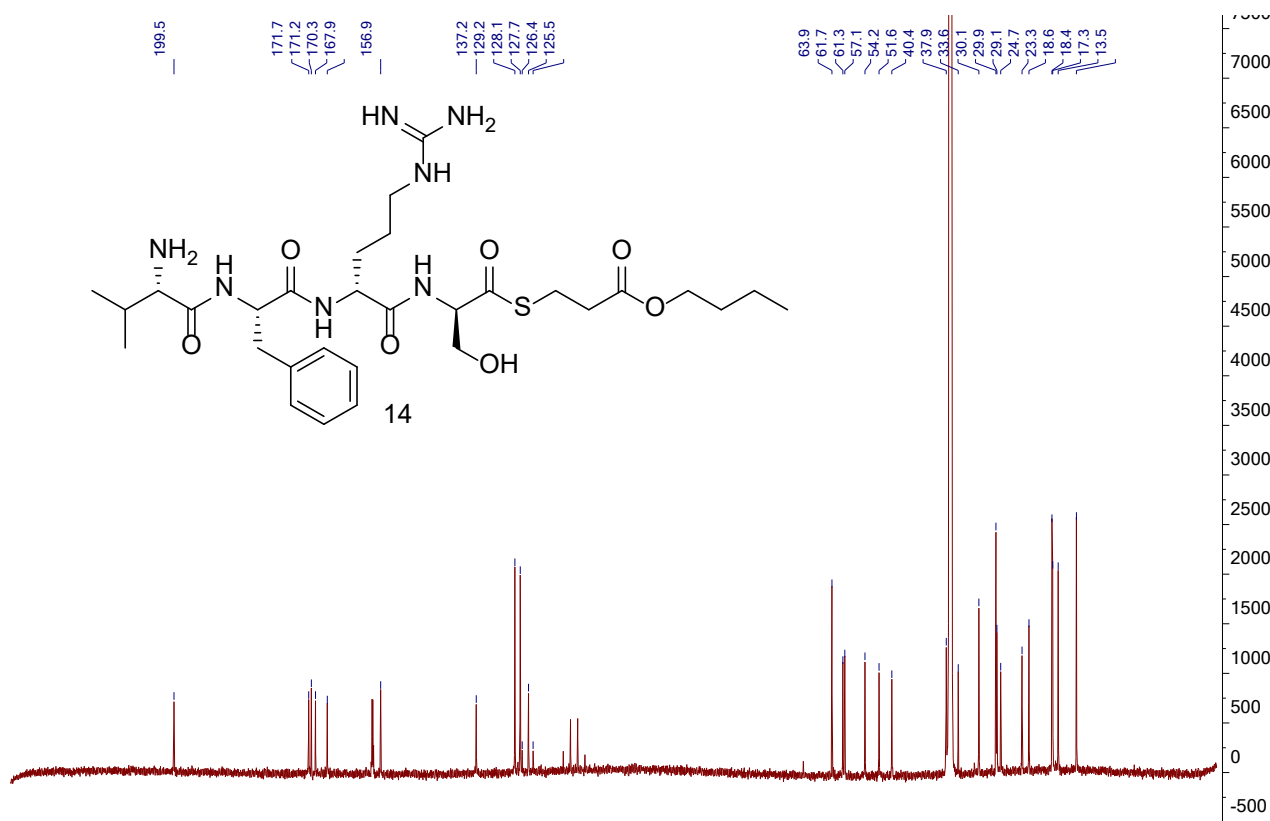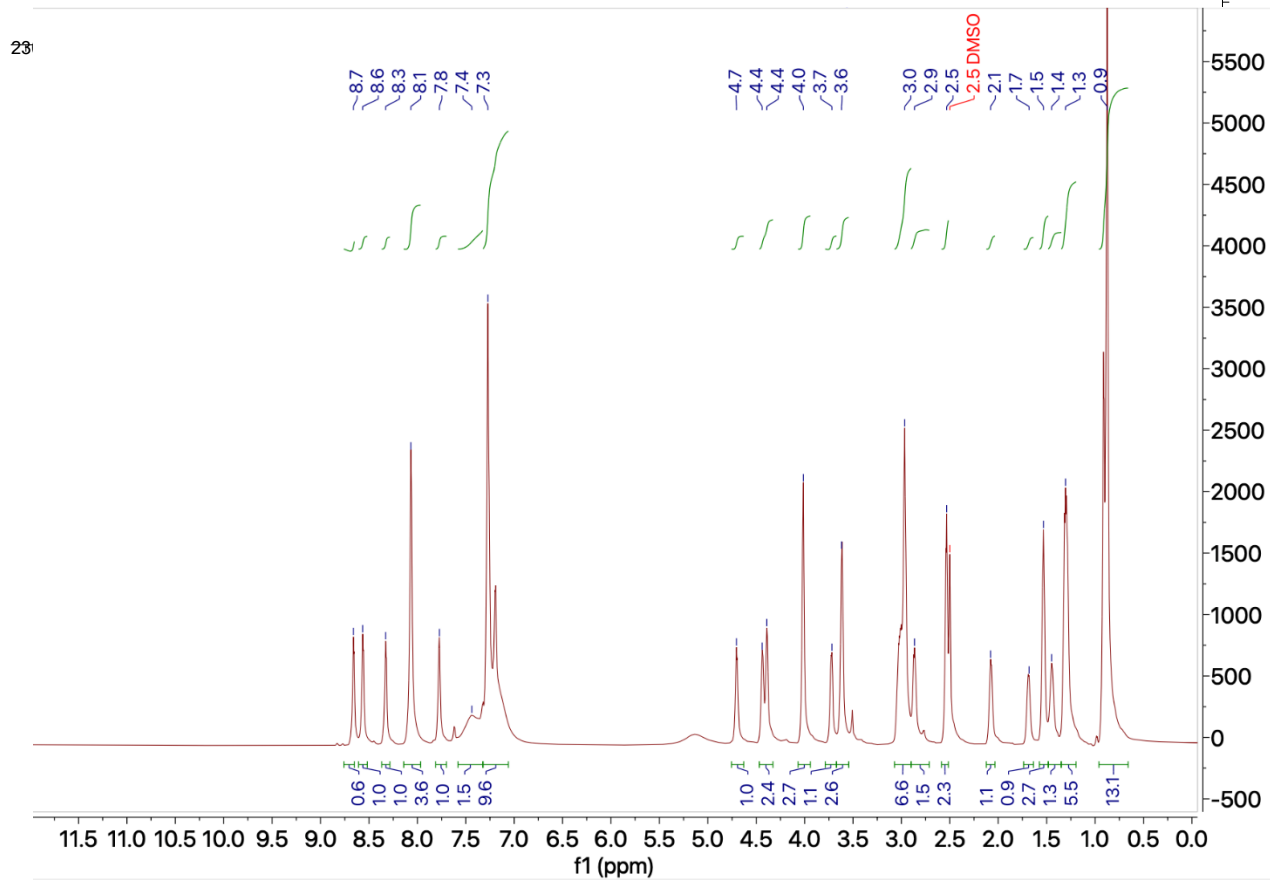

Supplementary Fig. 89:  $^{13}\text{C}$  (201 MHz) and  $^1\text{H}$  (800 MHz) NMR spectrum of **14** in  $\text{DMSO-d}_6$

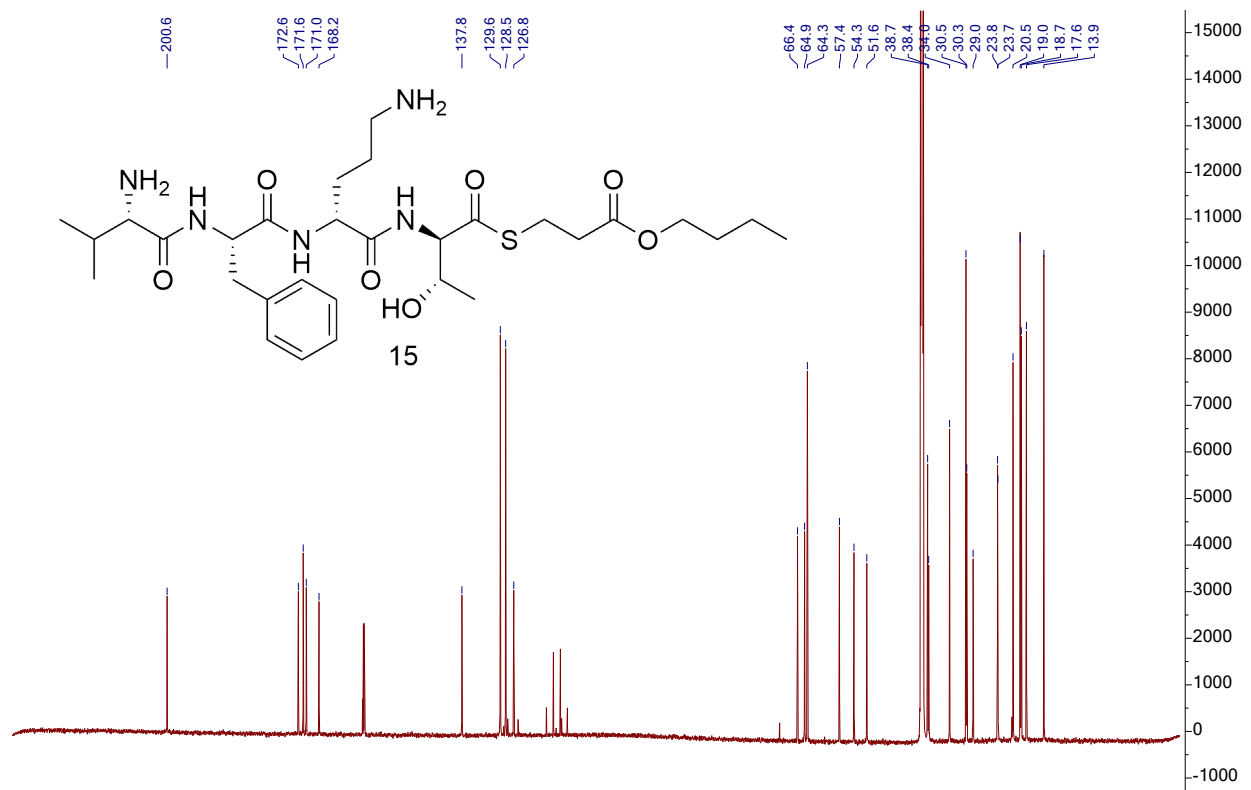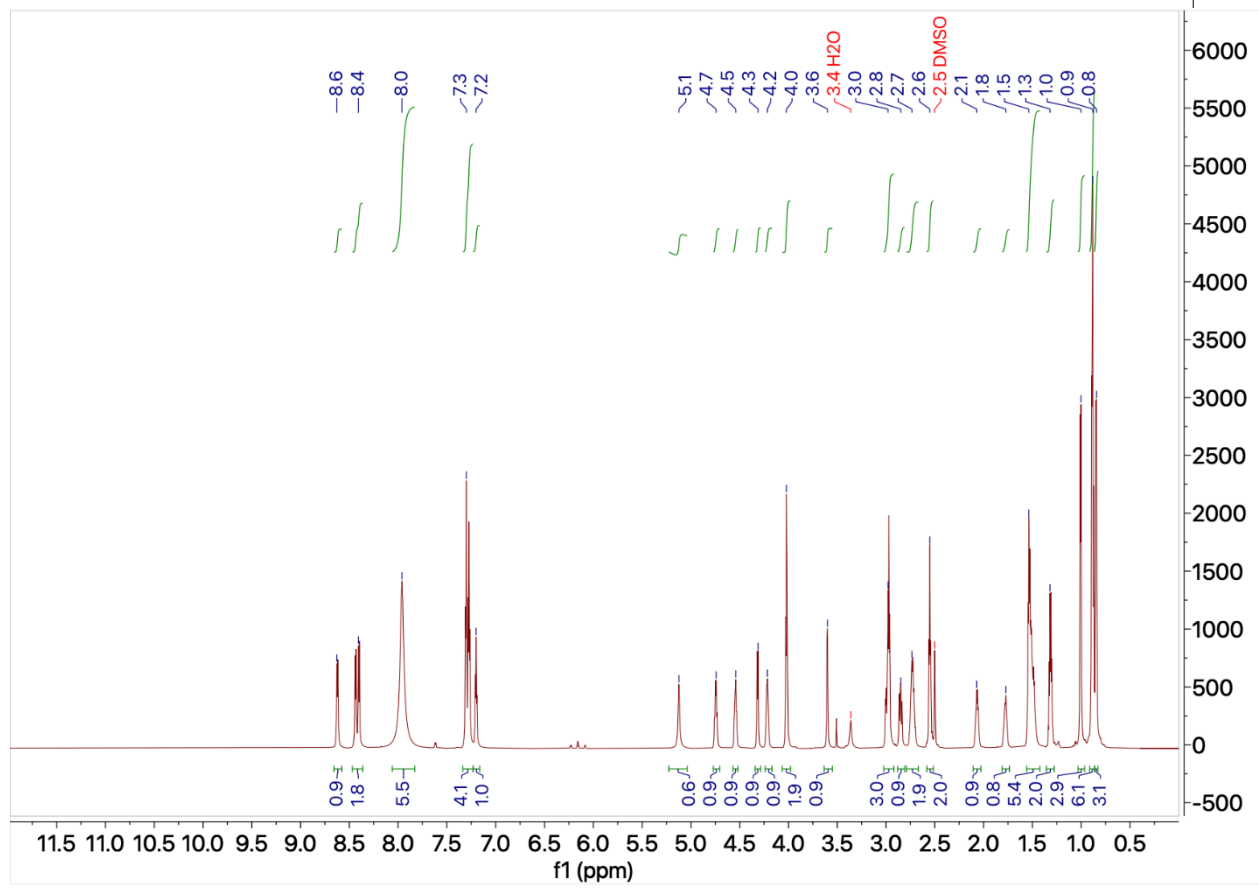

Supplementary Fig. 90: 13C (201 MHz) and 1H (800 MHz) NMR spectrum of **15** in DMSO-d<sub>6</sub>



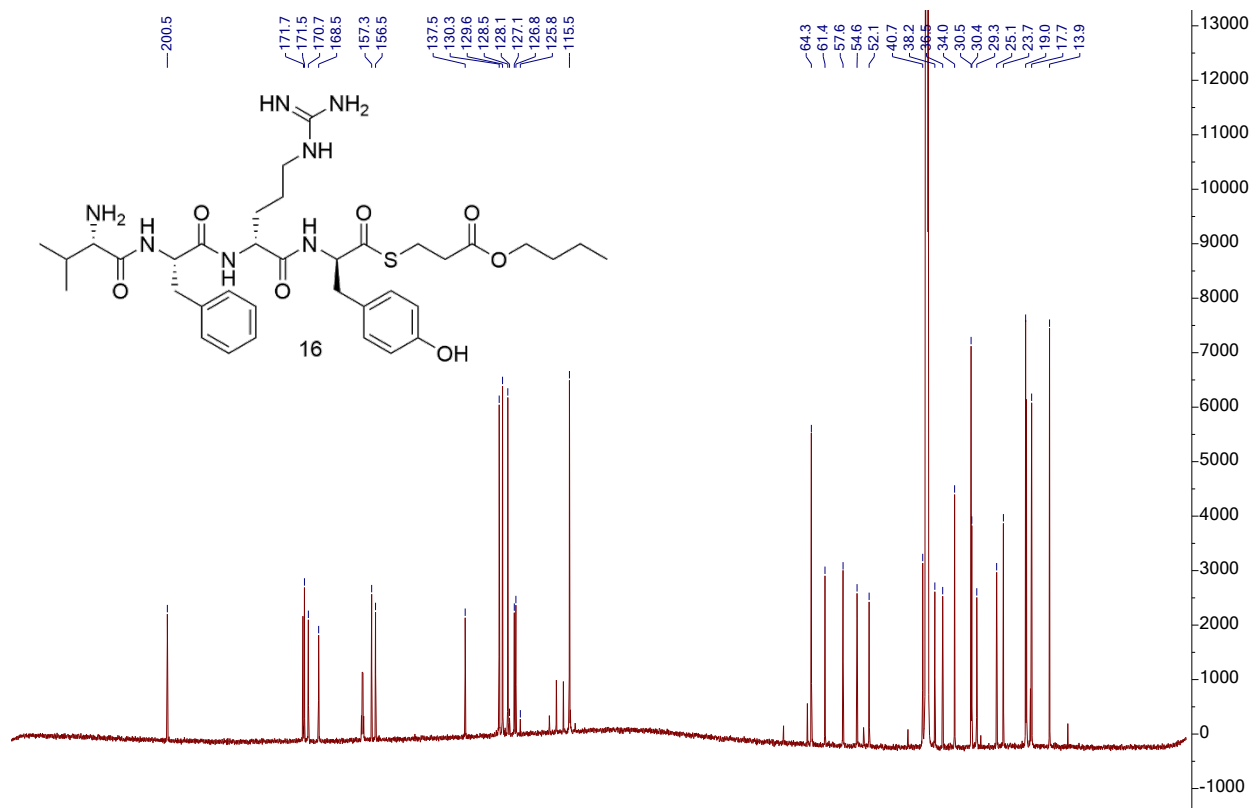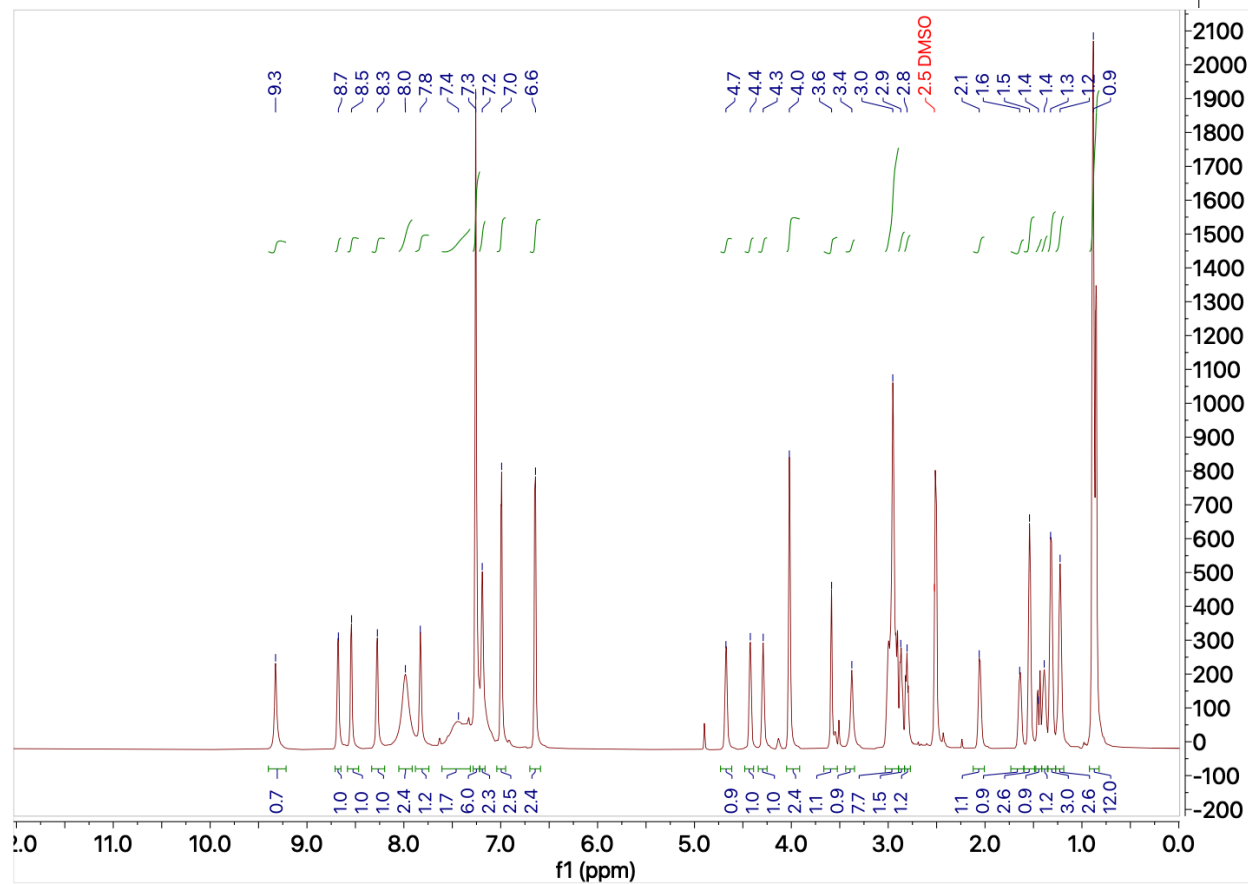

Supplementary Fig. 91: <sup>13</sup>C (201 MHz) and <sup>1</sup>H (800 MHz) NMR spectrum of **16** in DMSO-d<sub>6</sub>

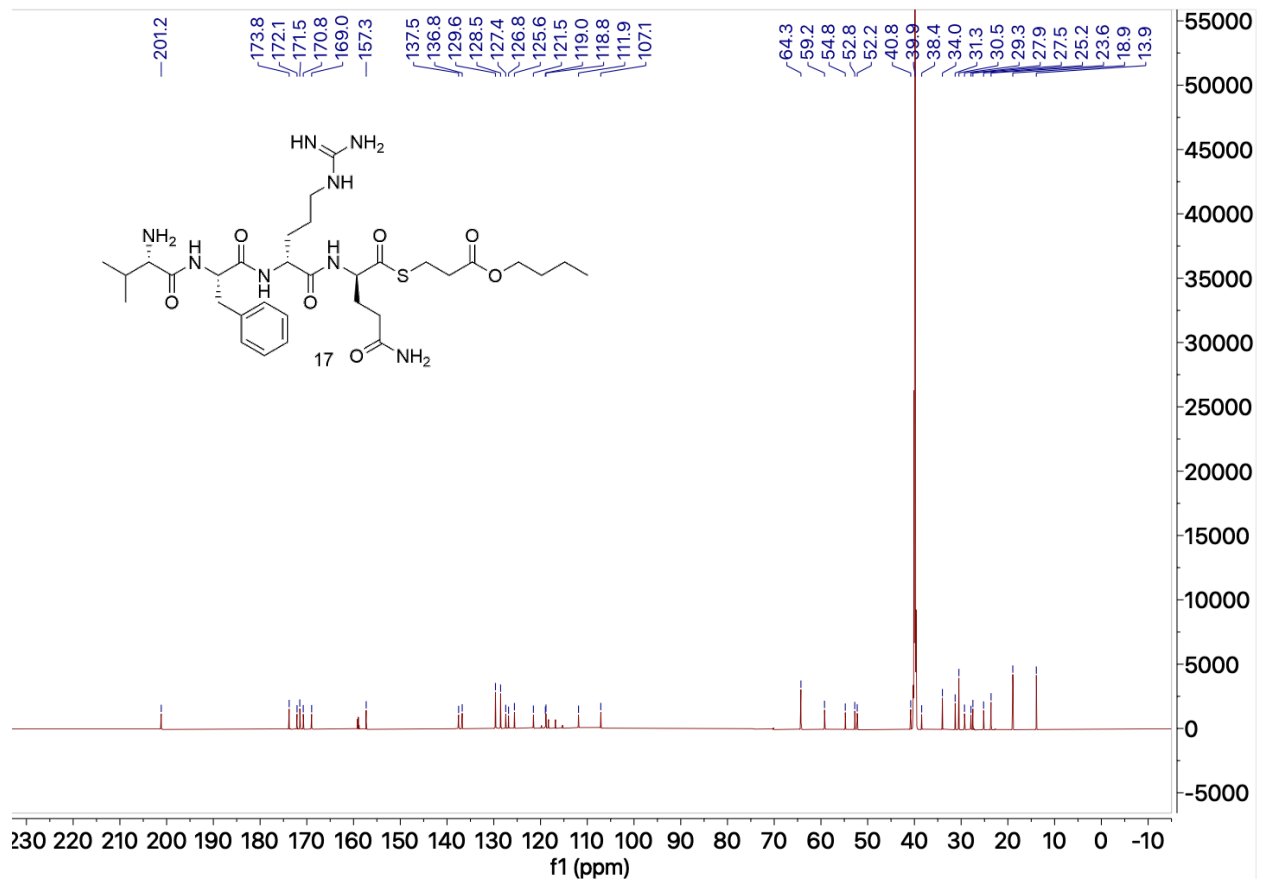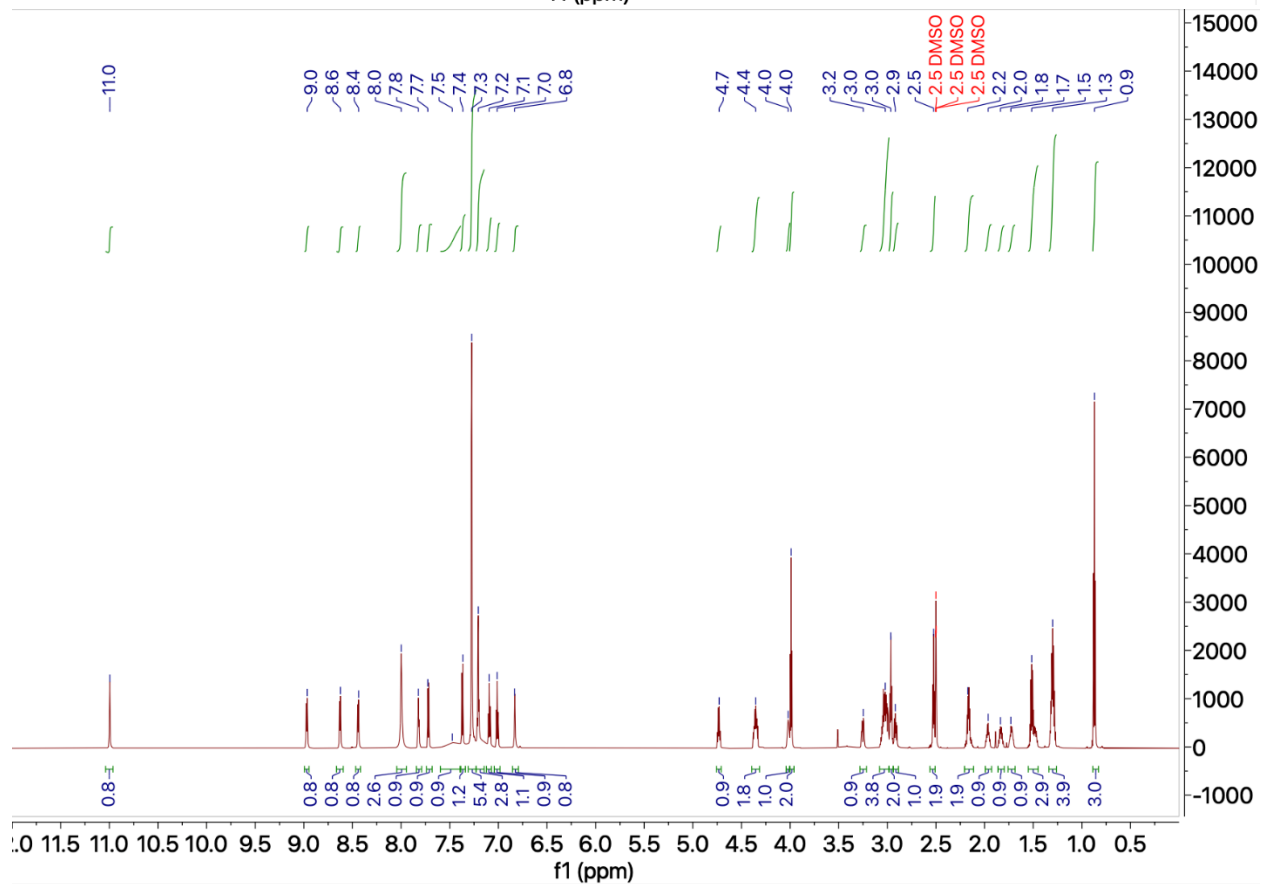

**Supplementary Fig. 92:** <sup>13</sup>C (201 MHz) and <sup>1</sup>H (800 MHz) NMR spectrum of **17** in DMSO-d<sub>6</sub>

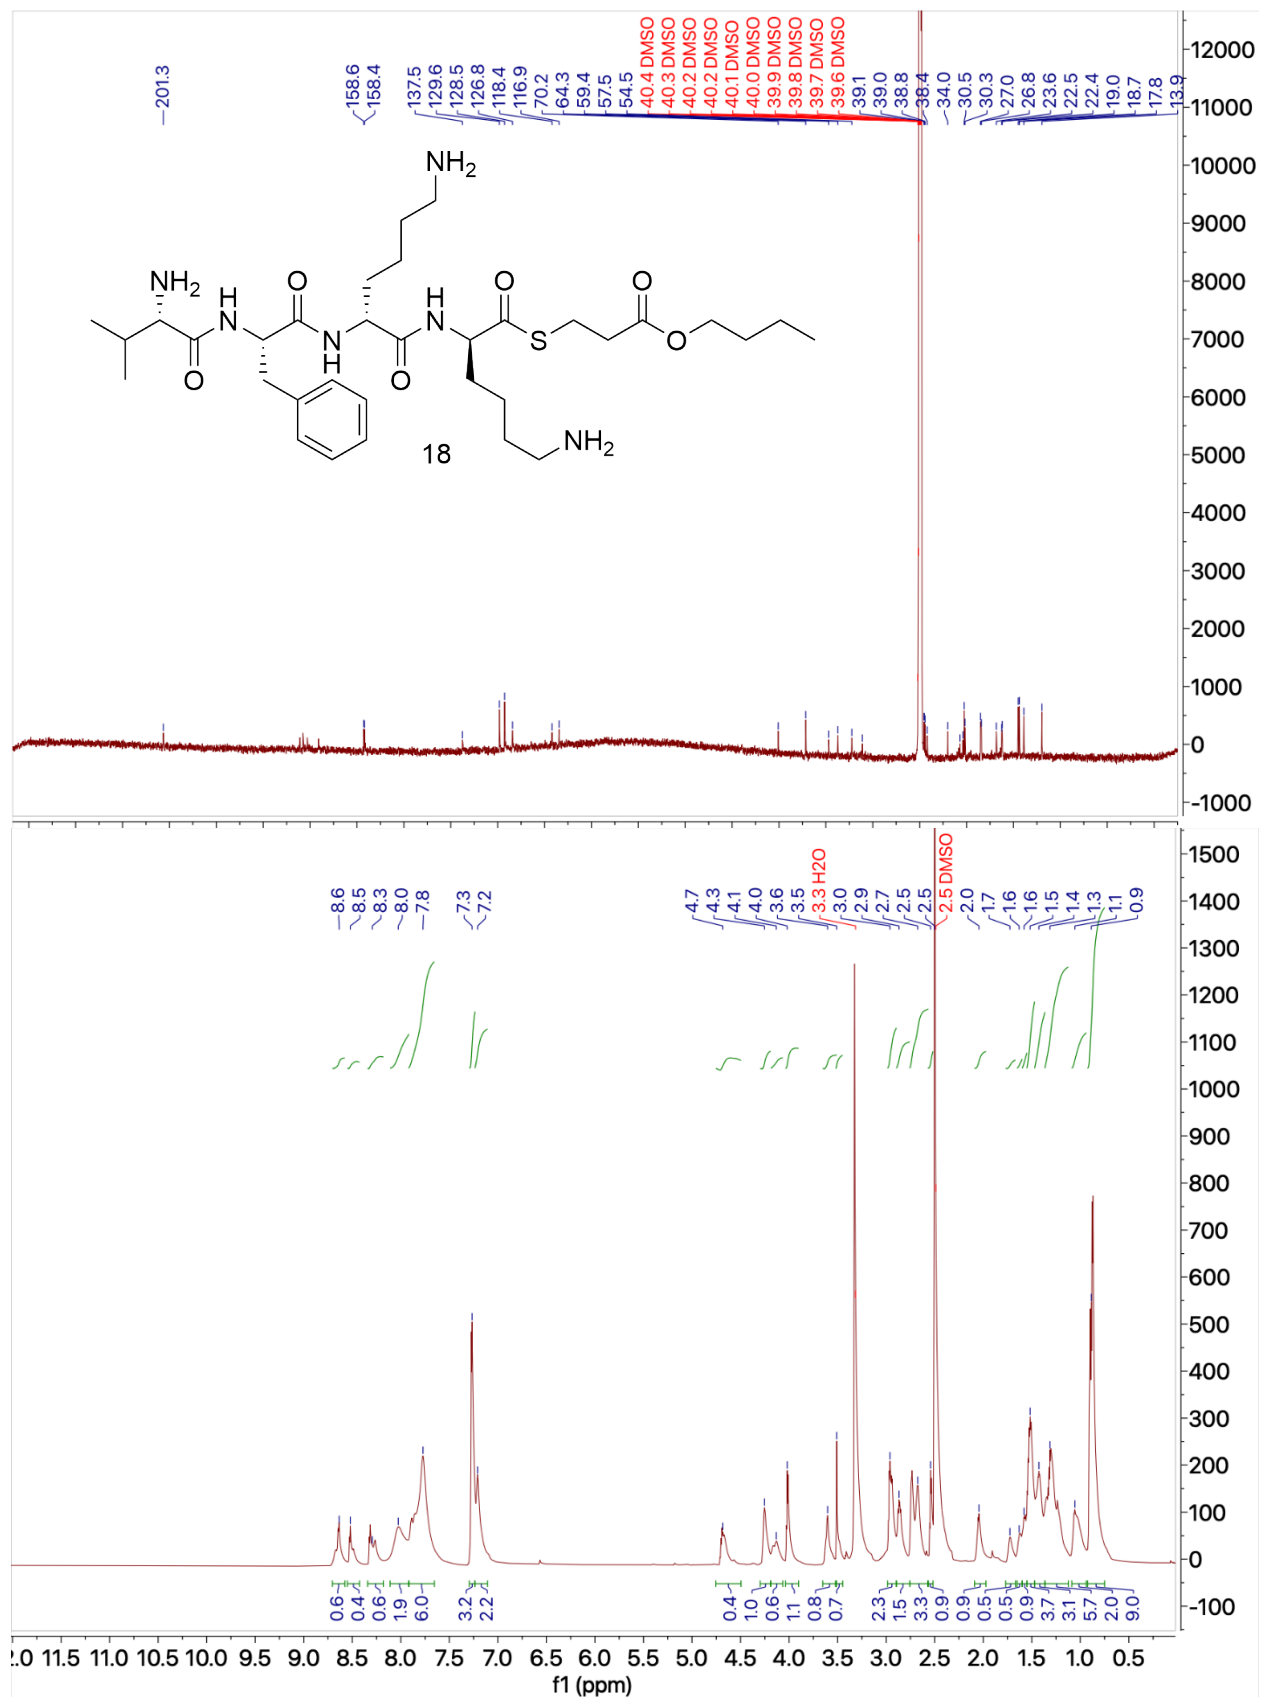

Supplementary Fig. 93: <sup>13</sup>C (201 MHz) and <sup>1</sup>H (800 MHz) NMR spectrum of **18** in DMSO-d<sub>6</sub>

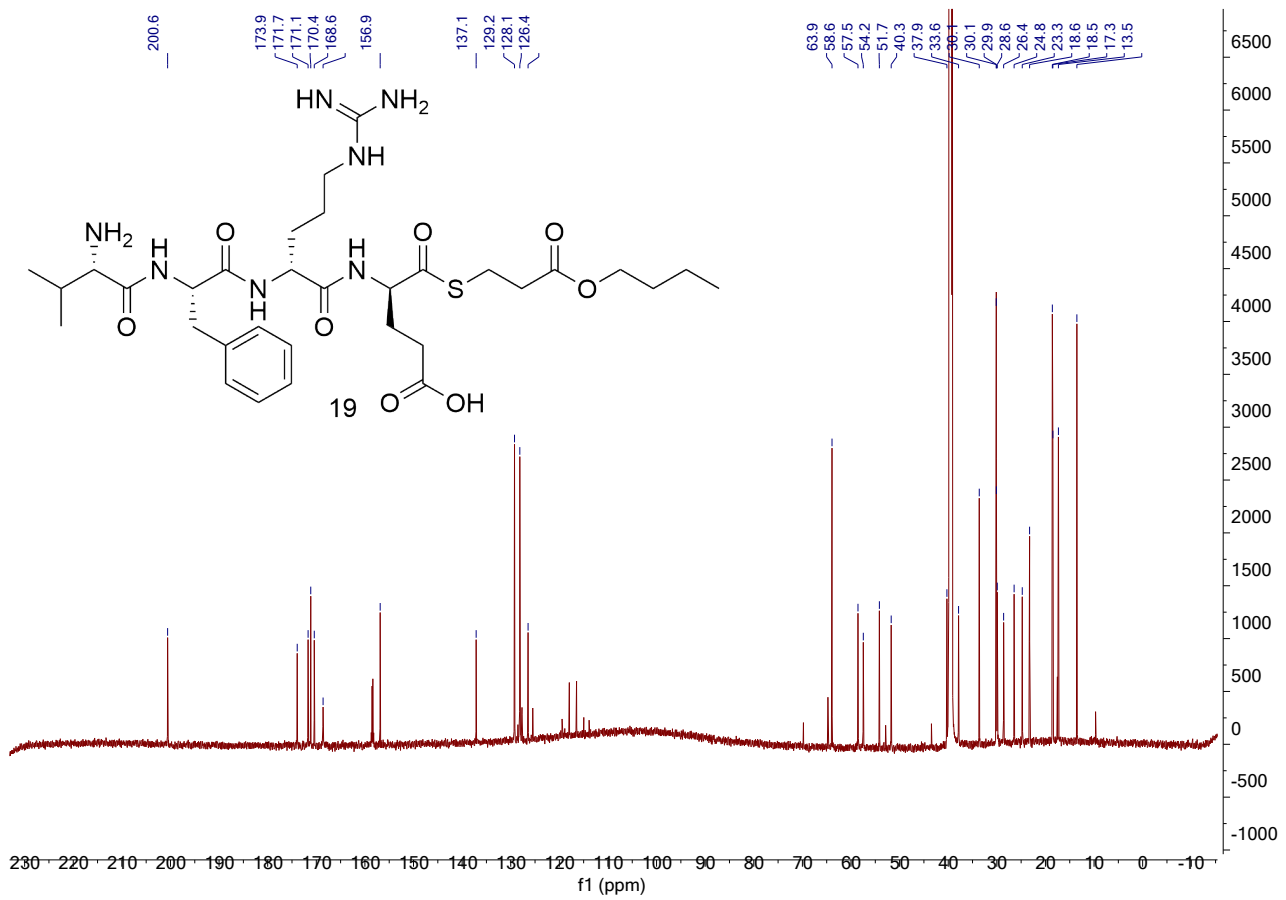

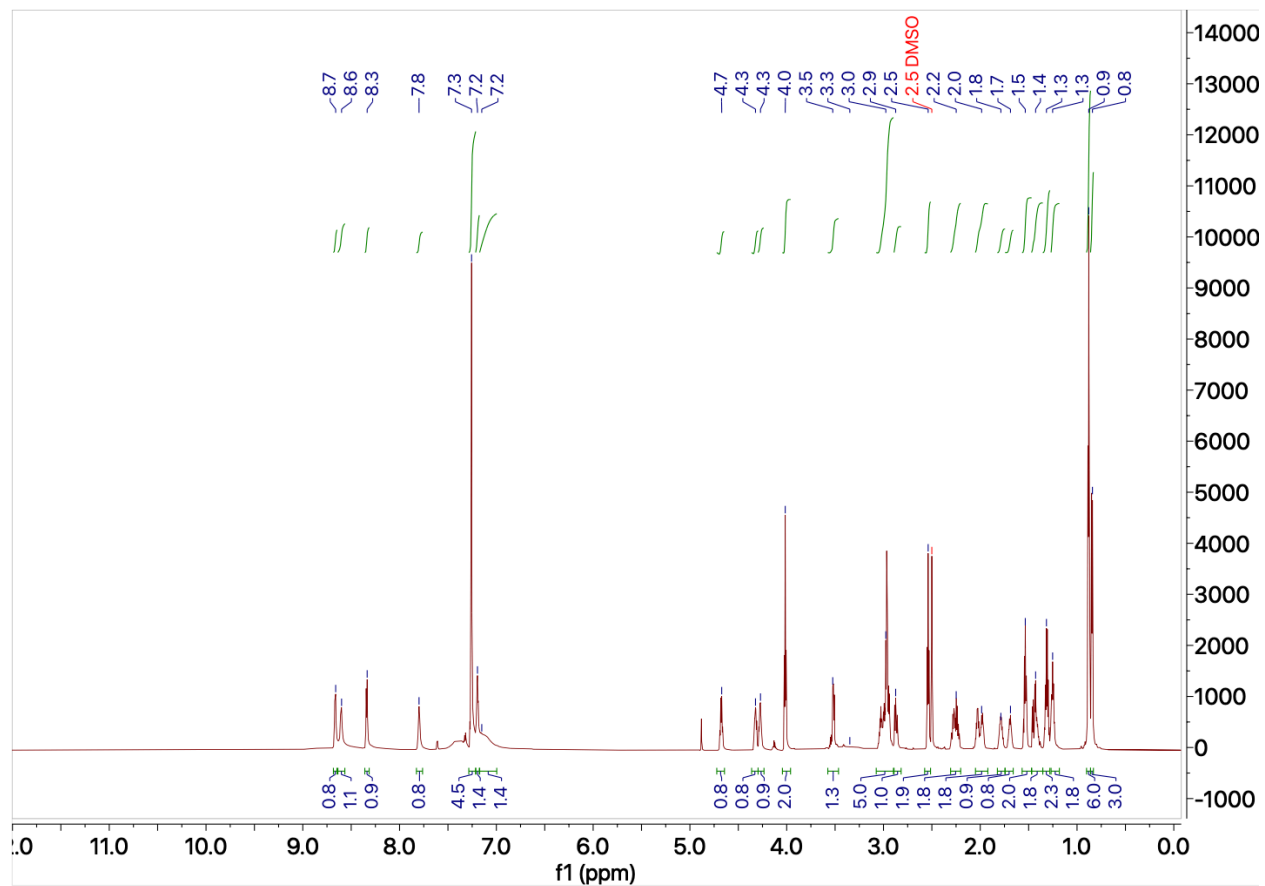

Supplementary Fig. 94: <sup>13</sup>C (201 MHz) and <sup>1</sup>H (800 MHz) NMR spectrum of 19 in DMSO-d<sub>6</sub>

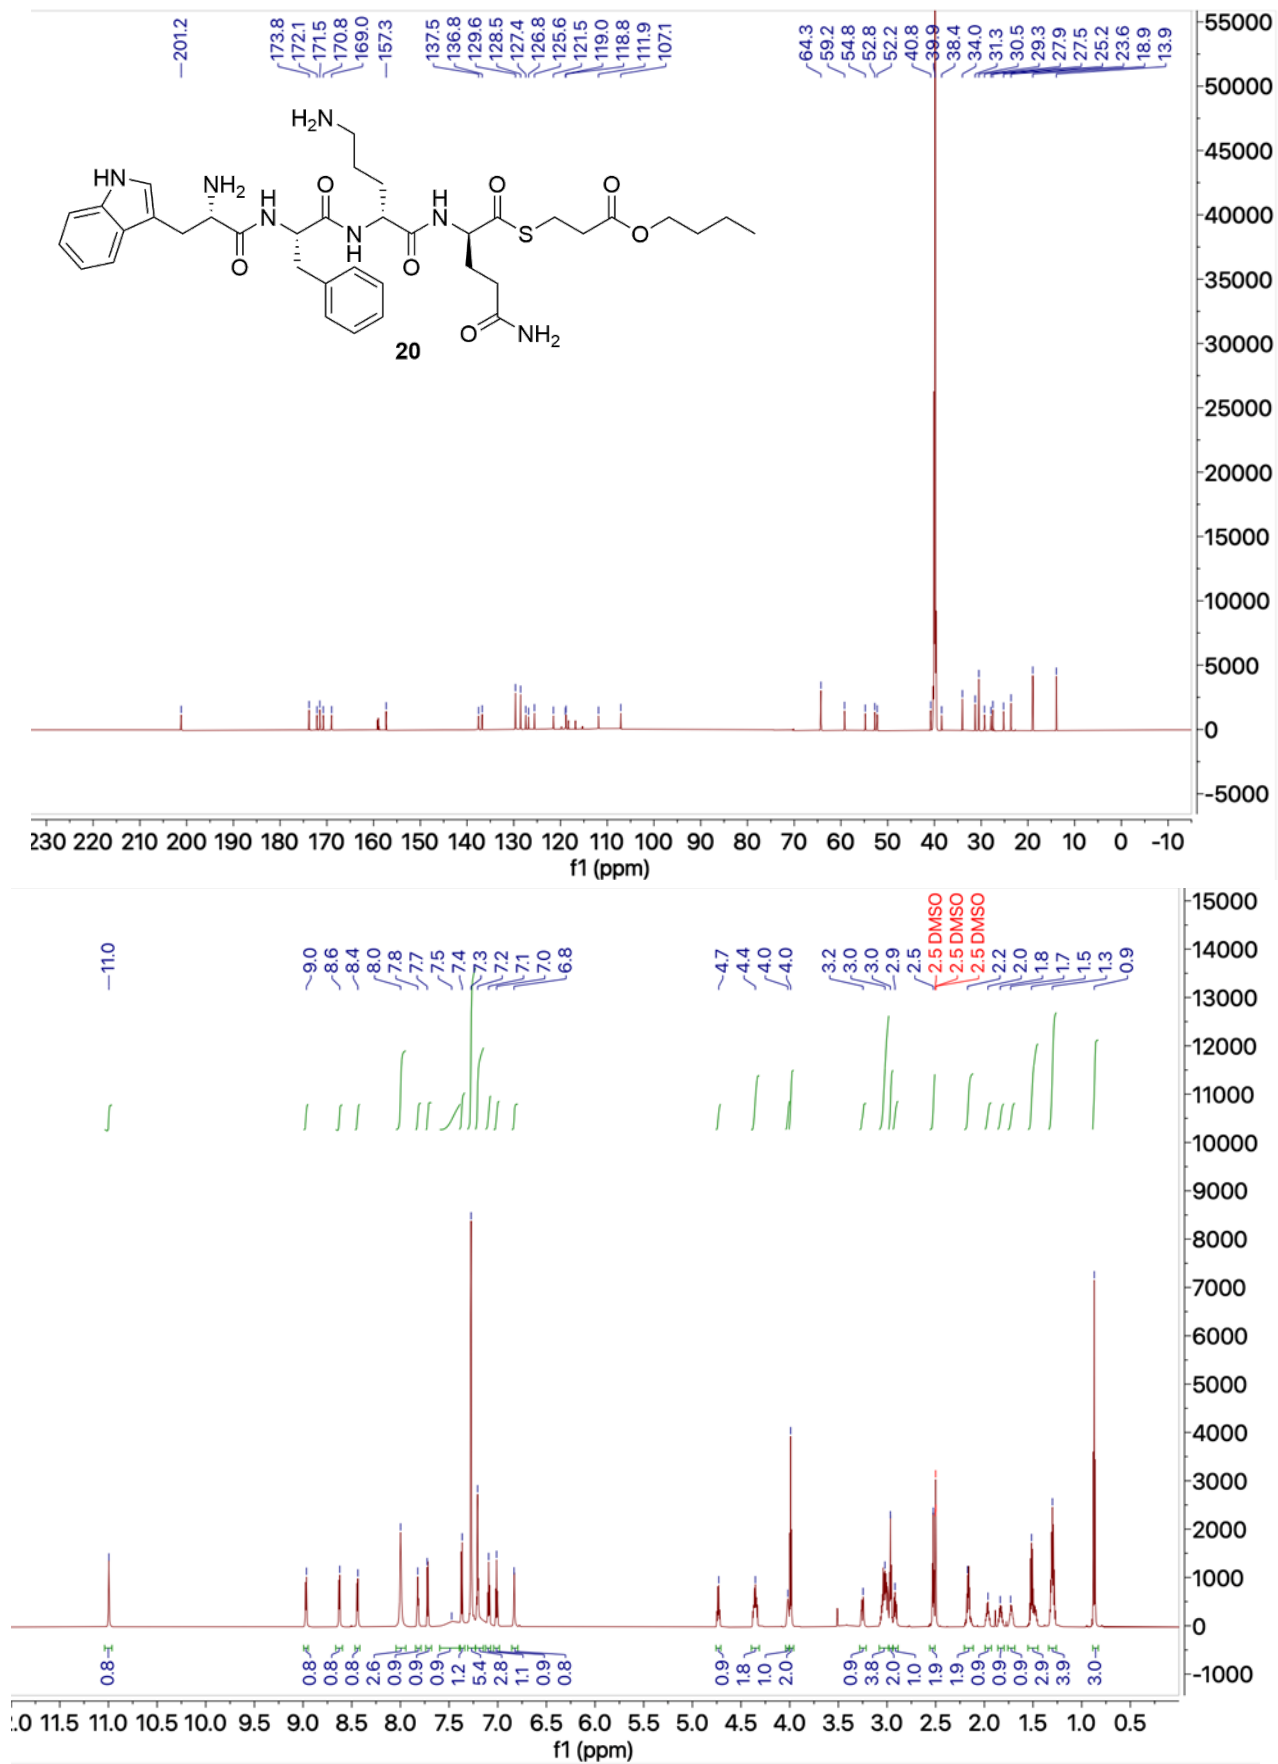

**Supplementary Fig. 95:** <sup>13</sup>C (201 MHz) and <sup>1</sup>H (800 MHz) NMR spectrum of **20** in DMSO-d<sub>6</sub>

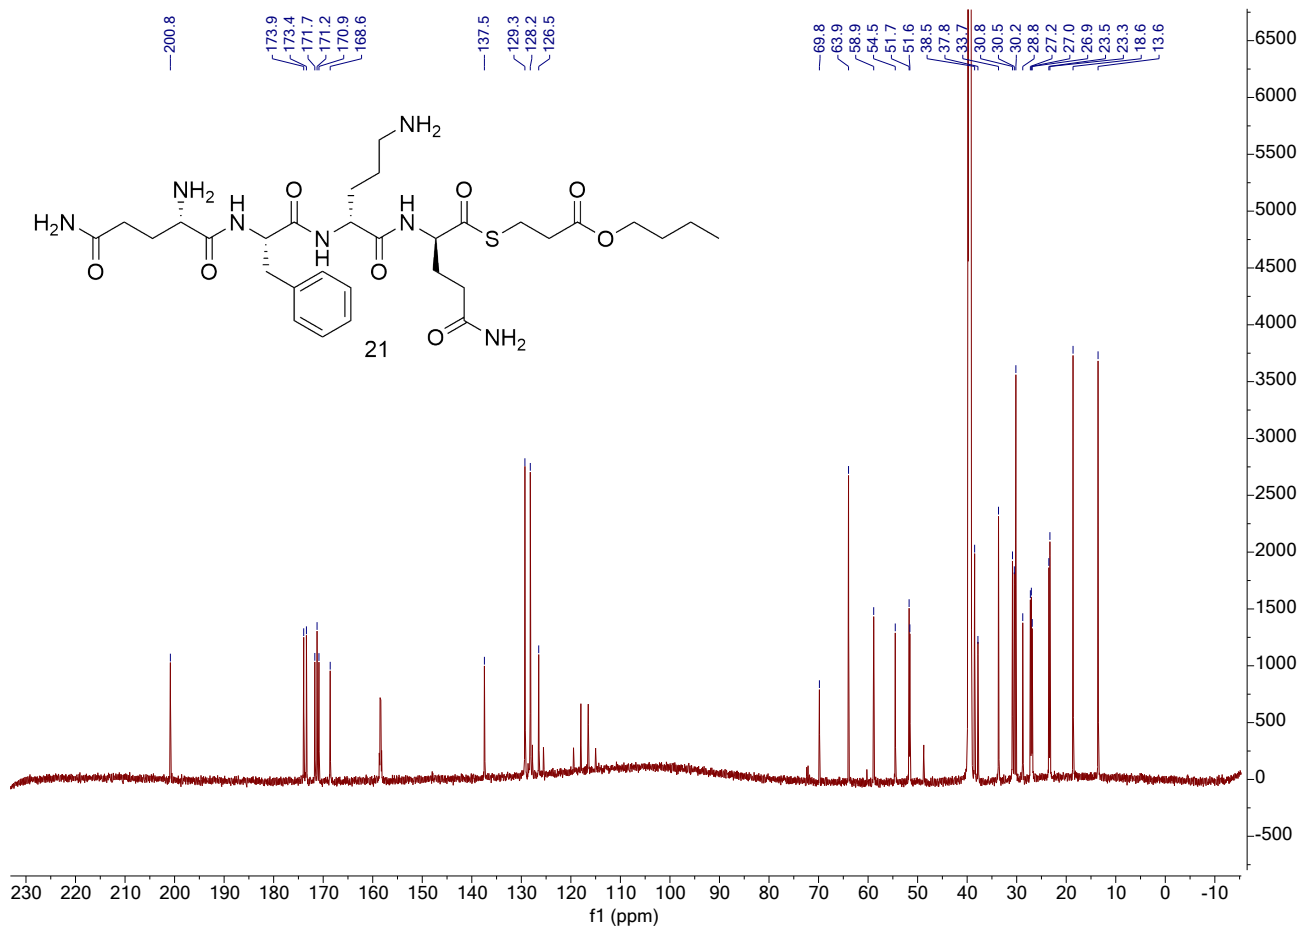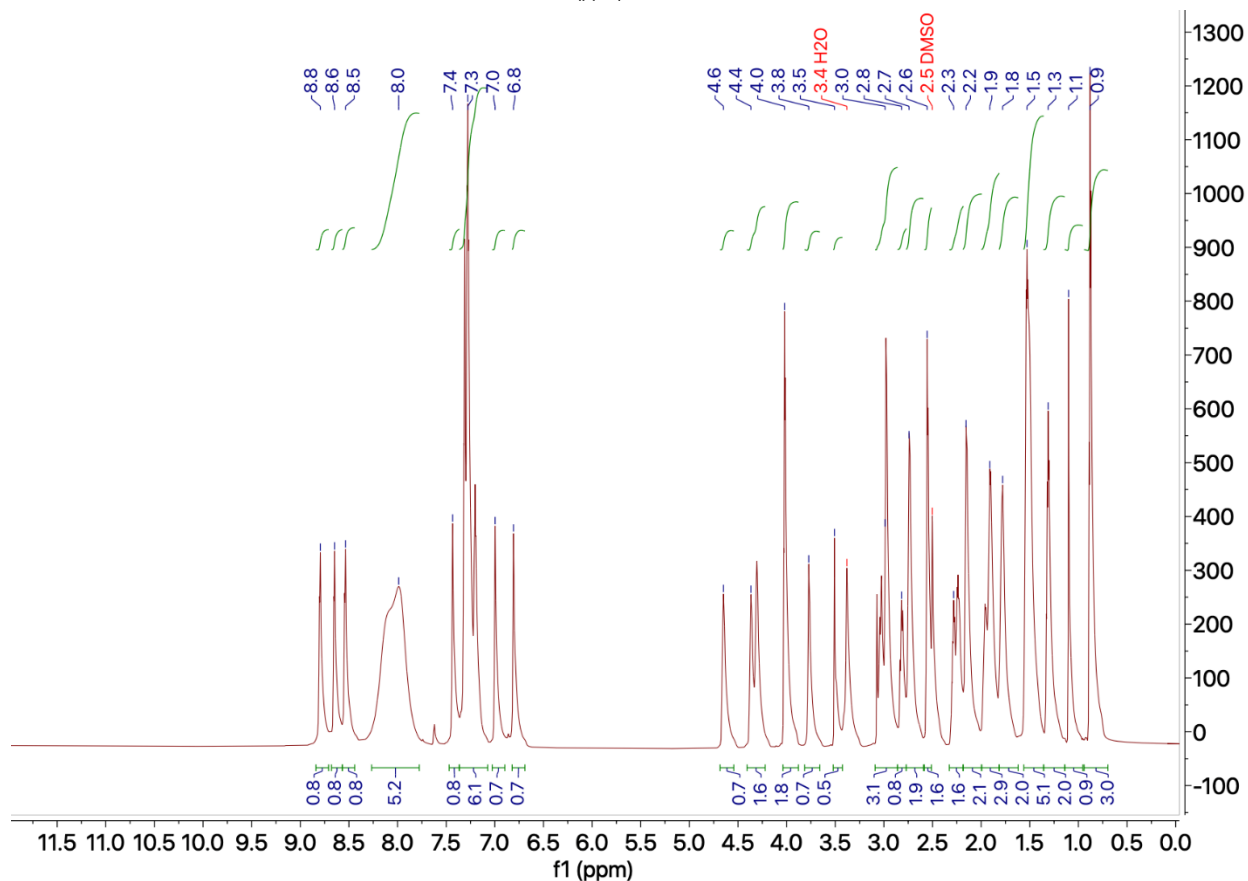

Supplementary Fig. 96: <sup>13</sup>C (201 MHz) and <sup>1</sup>H (800 MHz) NMR spectrum of 21 in DMSO-d<sub>6</sub>

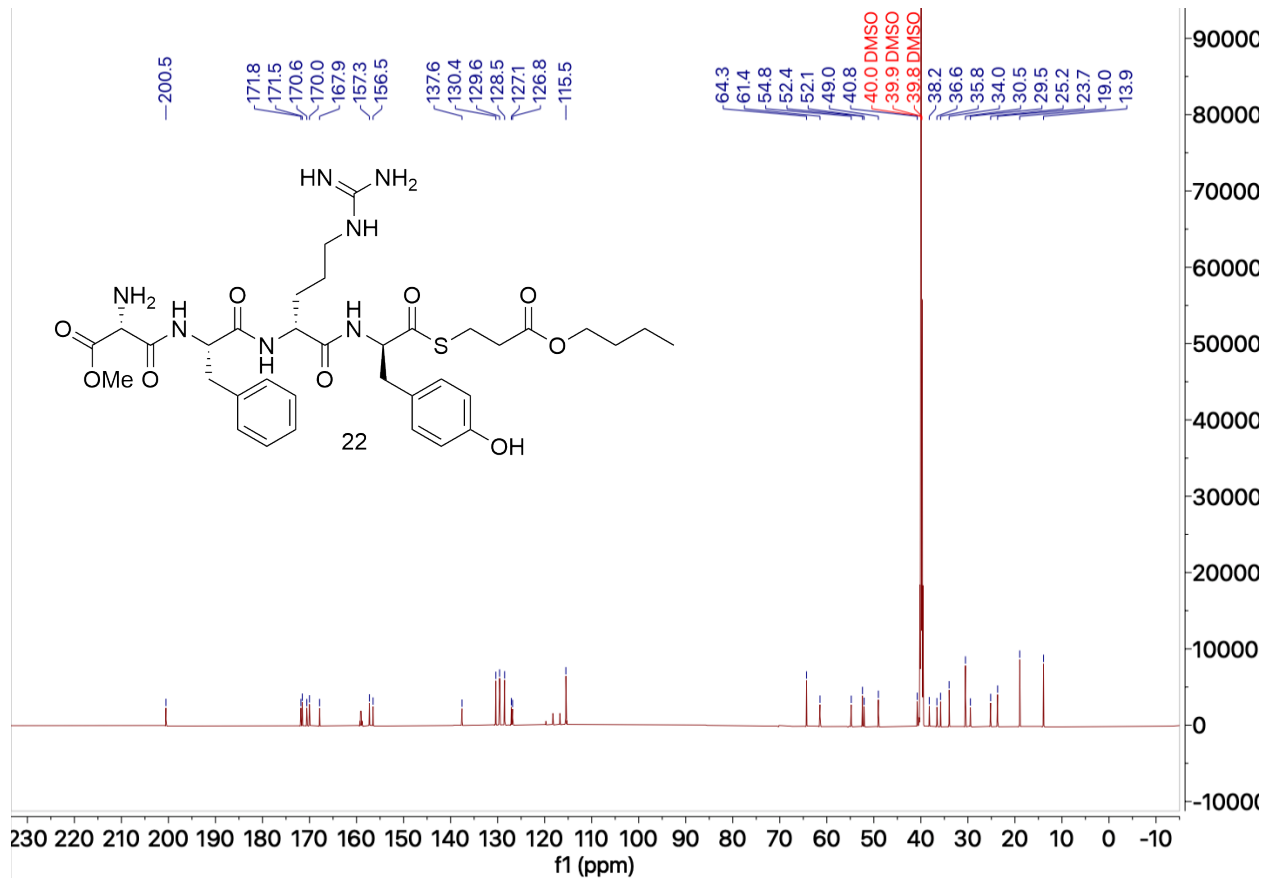



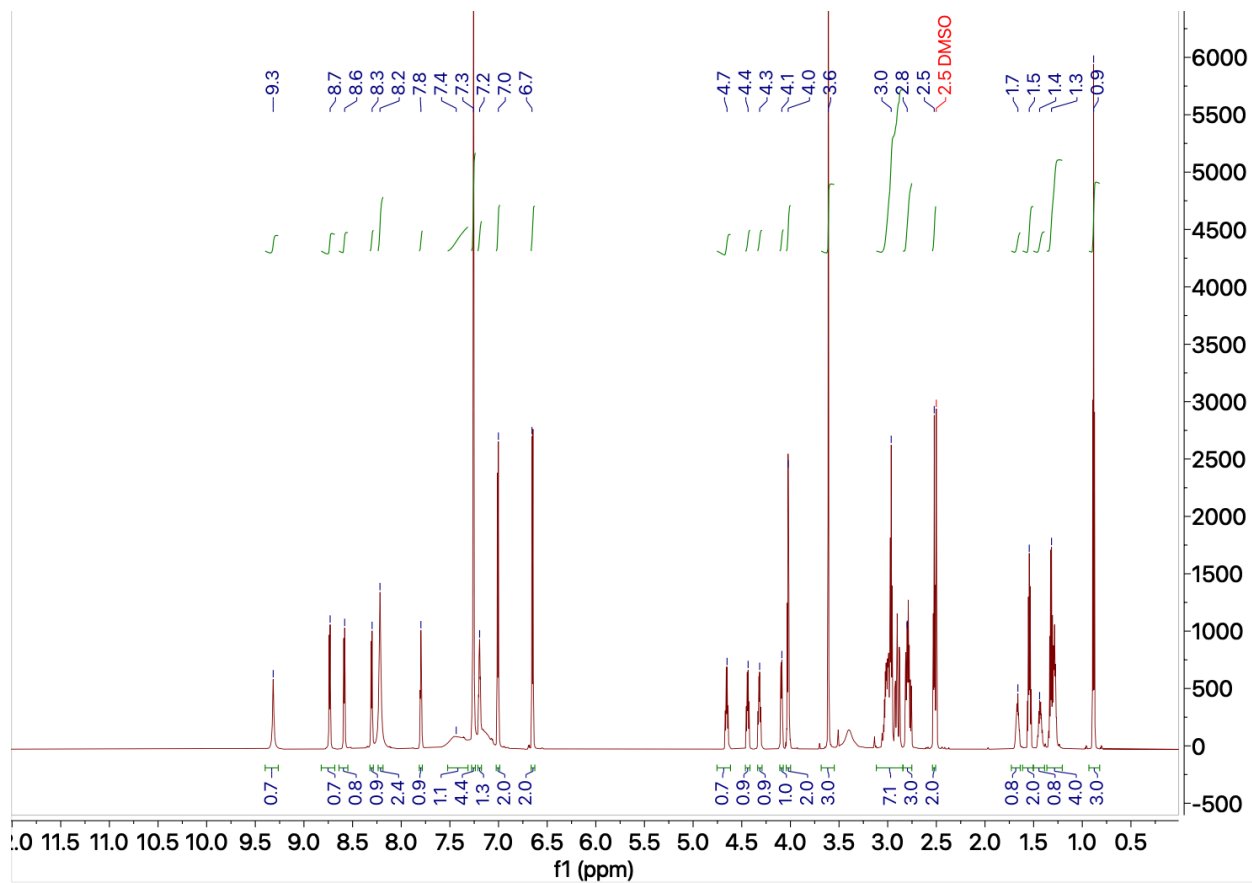

**Supplementary Fig. 97:** <sup>13</sup>C (201 MHz) and <sup>1</sup>H (800 MHz) NMR spectrum of **22** in DMSO-d<sub>6</sub>

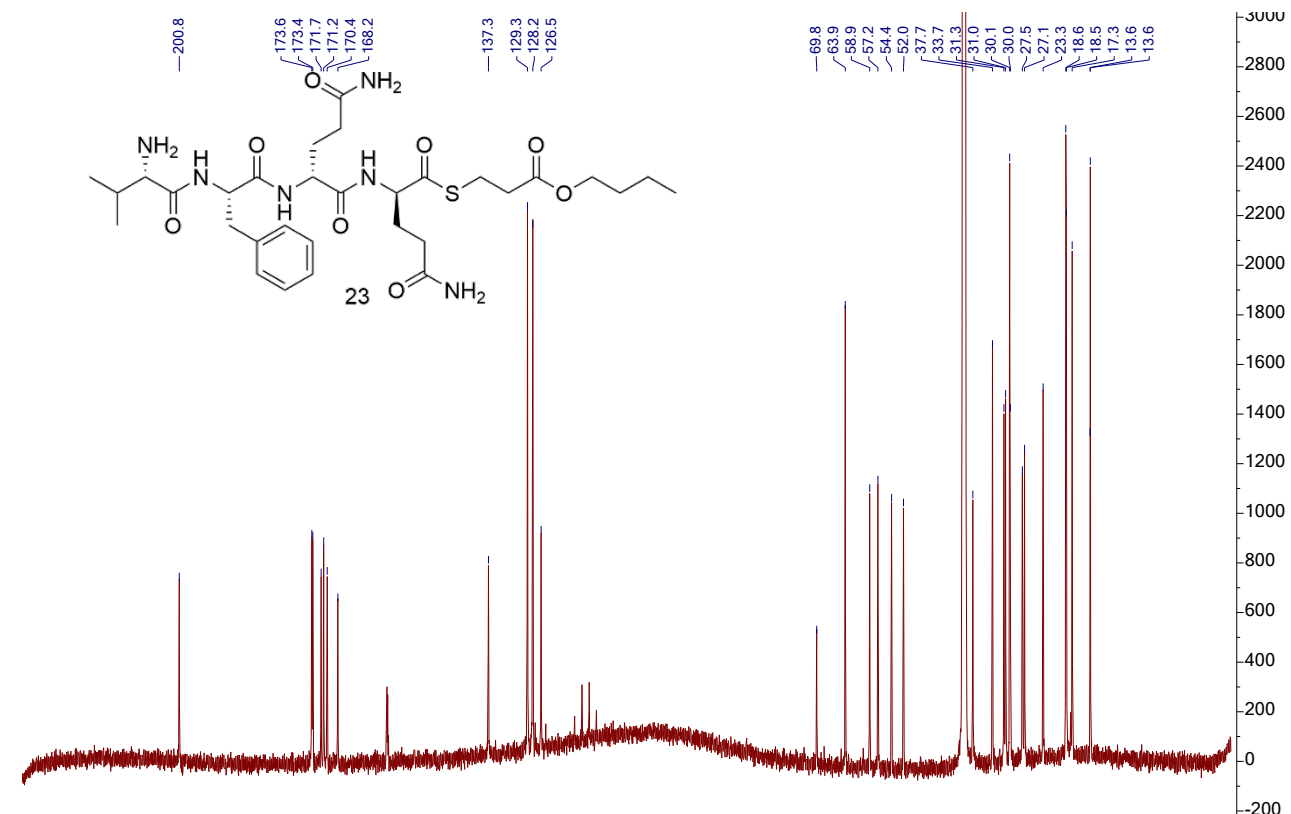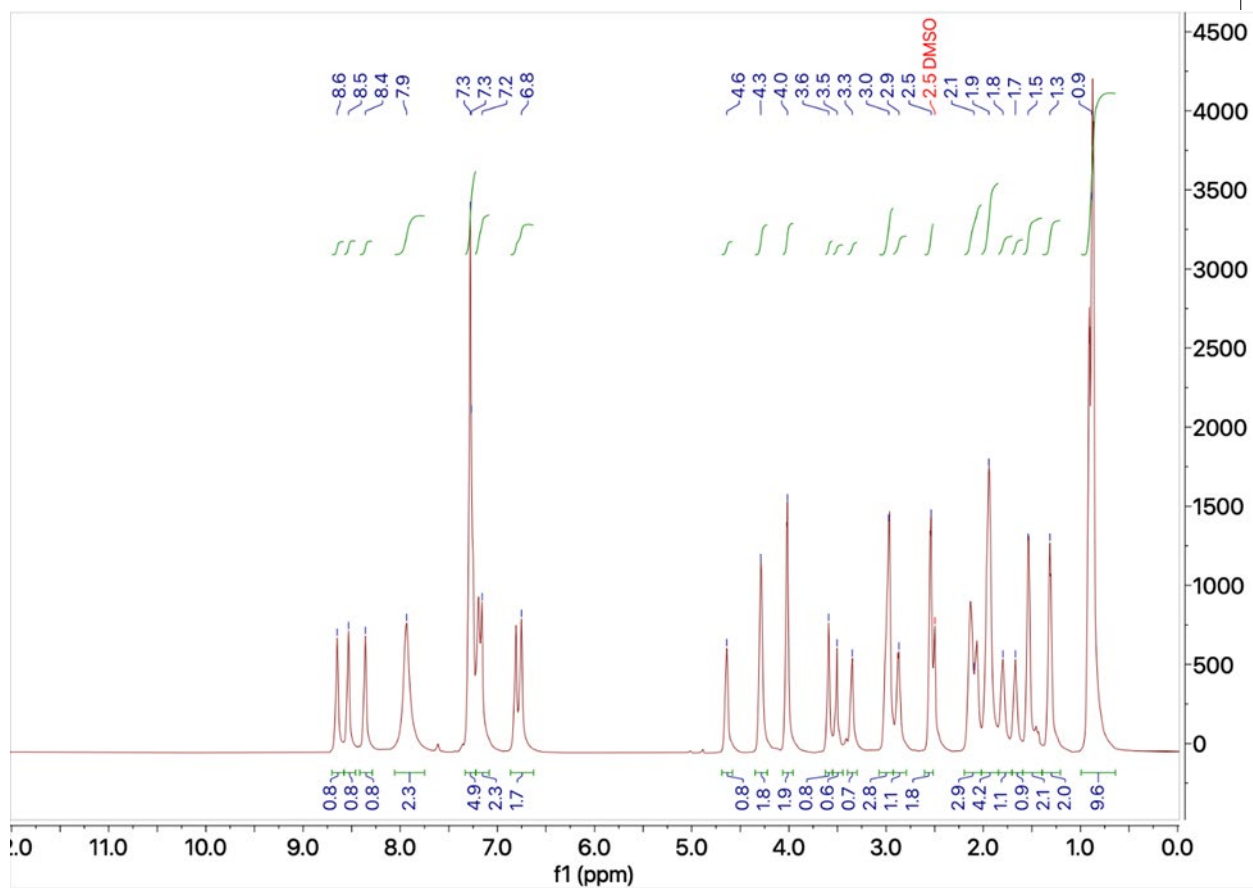

Supplementary Fig. 98: <sup>13</sup>C (201 MHz) and <sup>1</sup>H (800 MHz) NMR spectrum of **23** in DMSO-d<sub>6</sub>

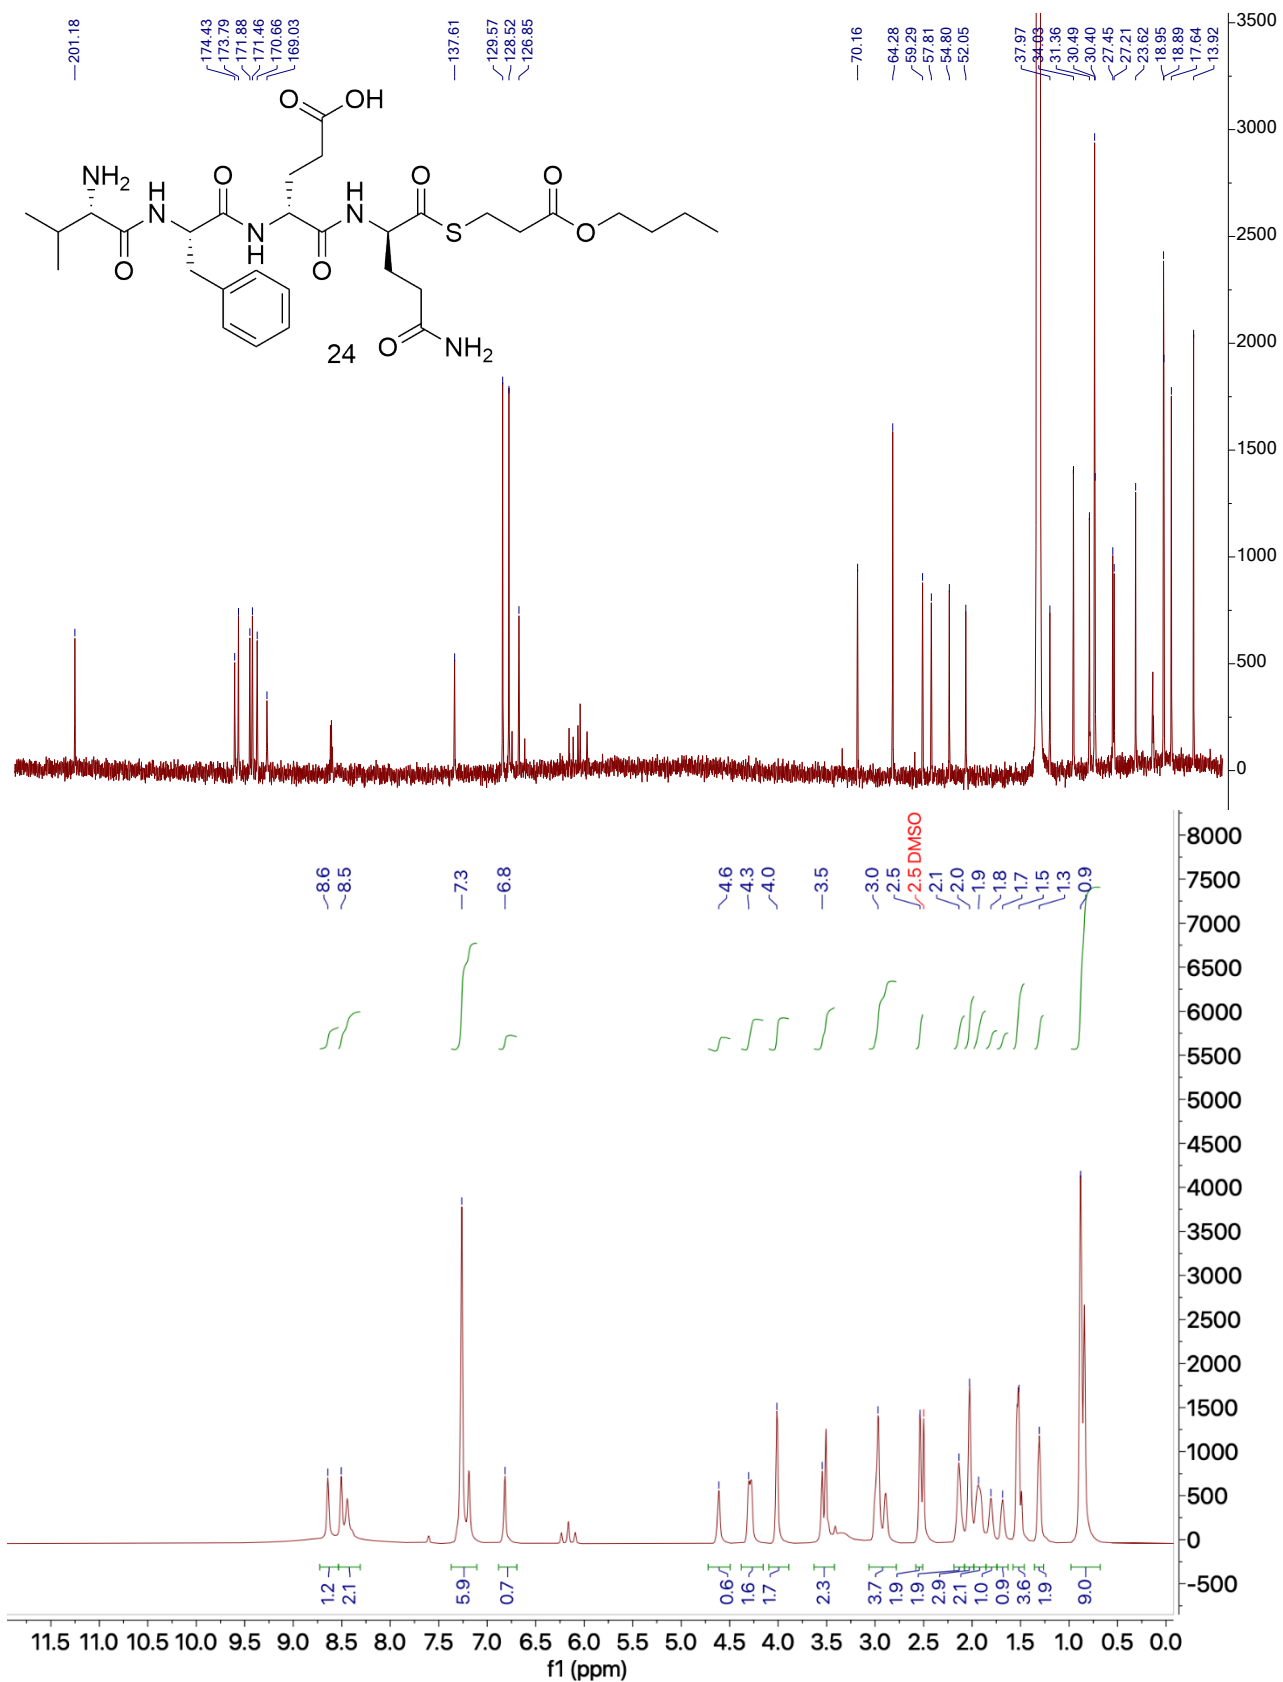

**Supplementary Fig. 99:** <sup>13</sup>C (201 MHz) and <sup>1</sup>H (800 MHz) NMR spectrum of **24** in DMSO-d<sub>6</sub>

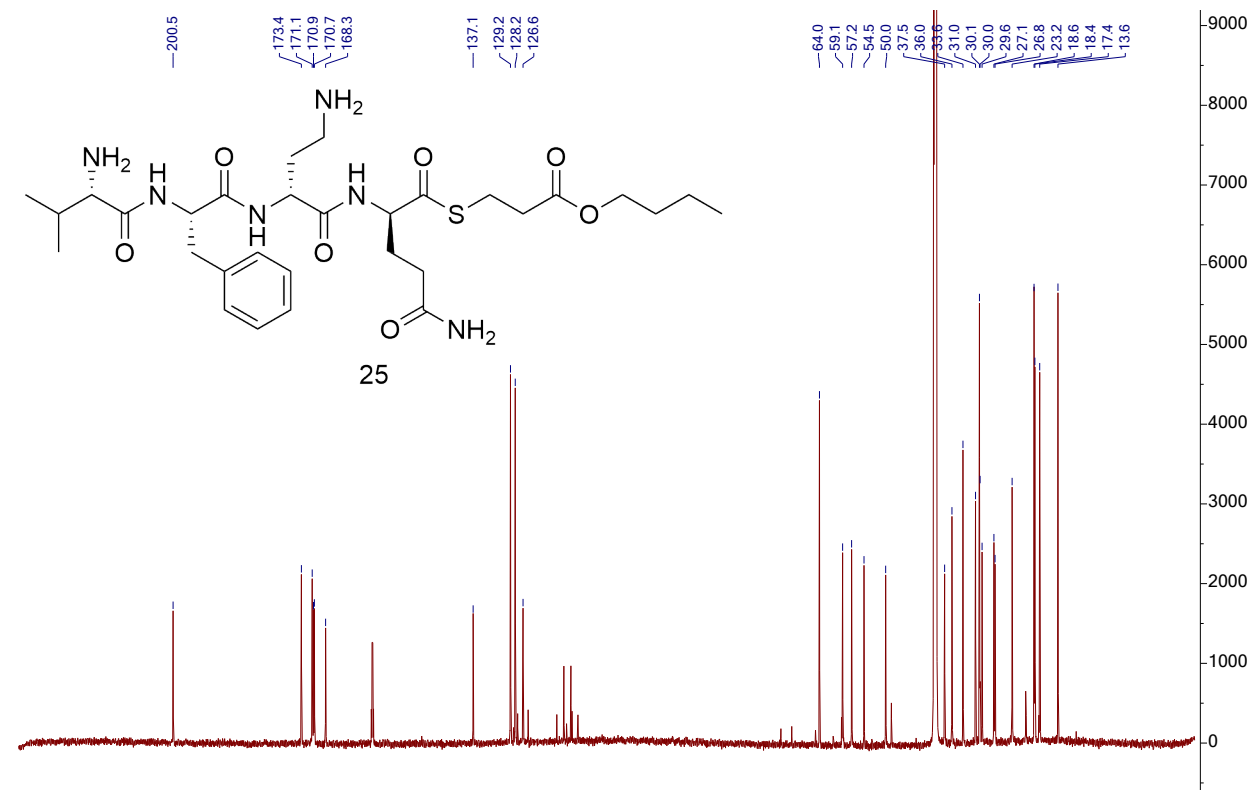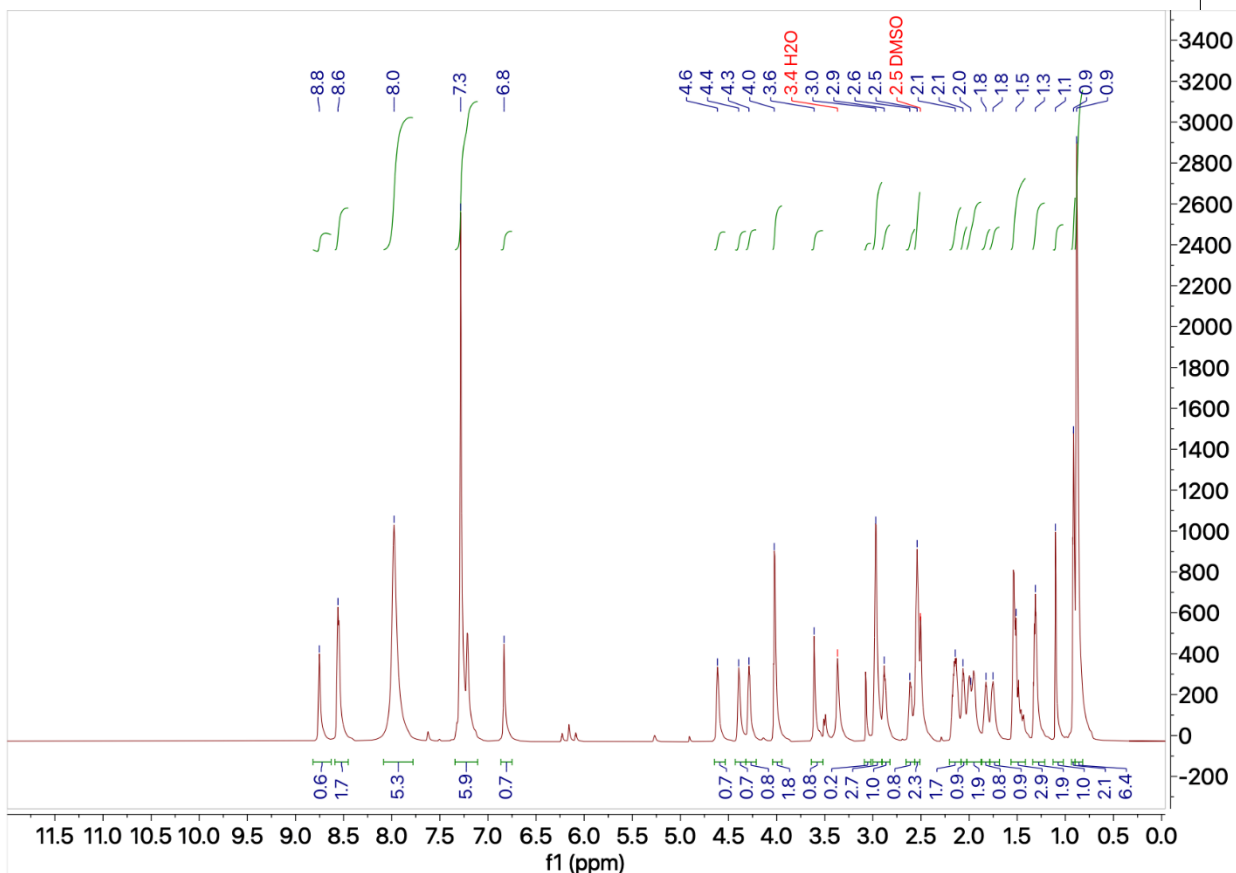

Supplementary Fig. 100: <sup>13</sup>C (201 MHz) and <sup>1</sup>H (800 MHz) NMR spectrum of **25** in DMSO-d<sub>6</sub>

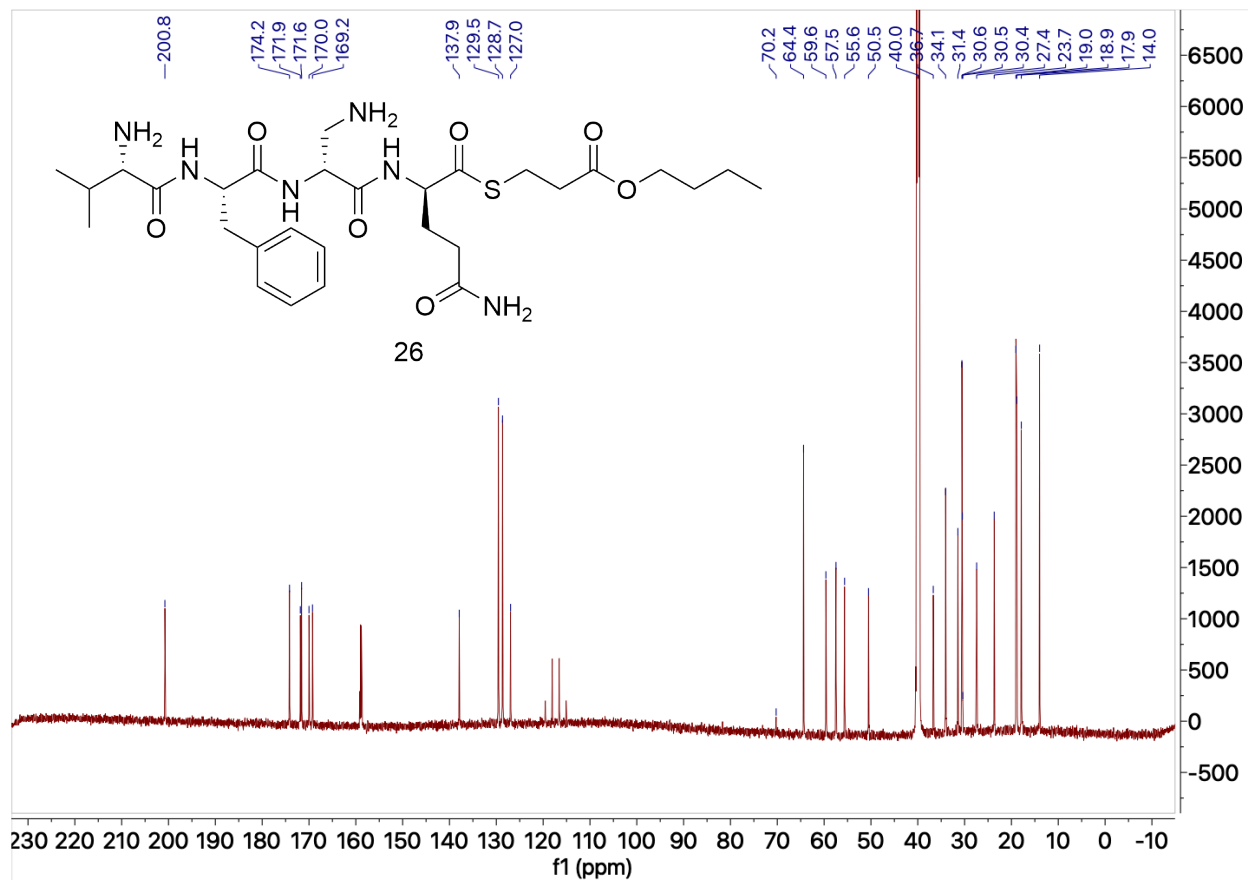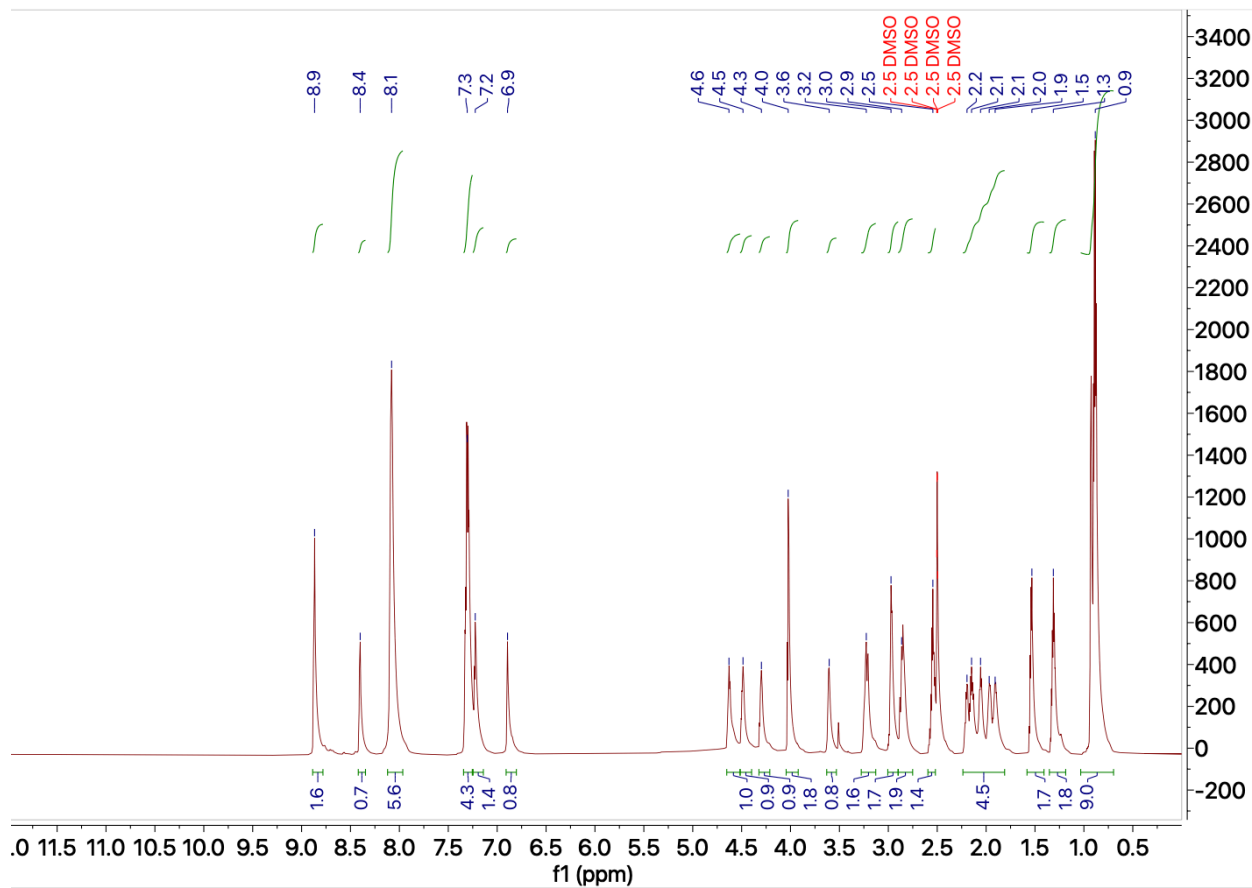

Supplementary Fig. 101: <sup>13</sup>C (201 MHz) and <sup>1</sup>H (800 MHz) NMR spectrum of **26** in DMSO-d<sub>6</sub>

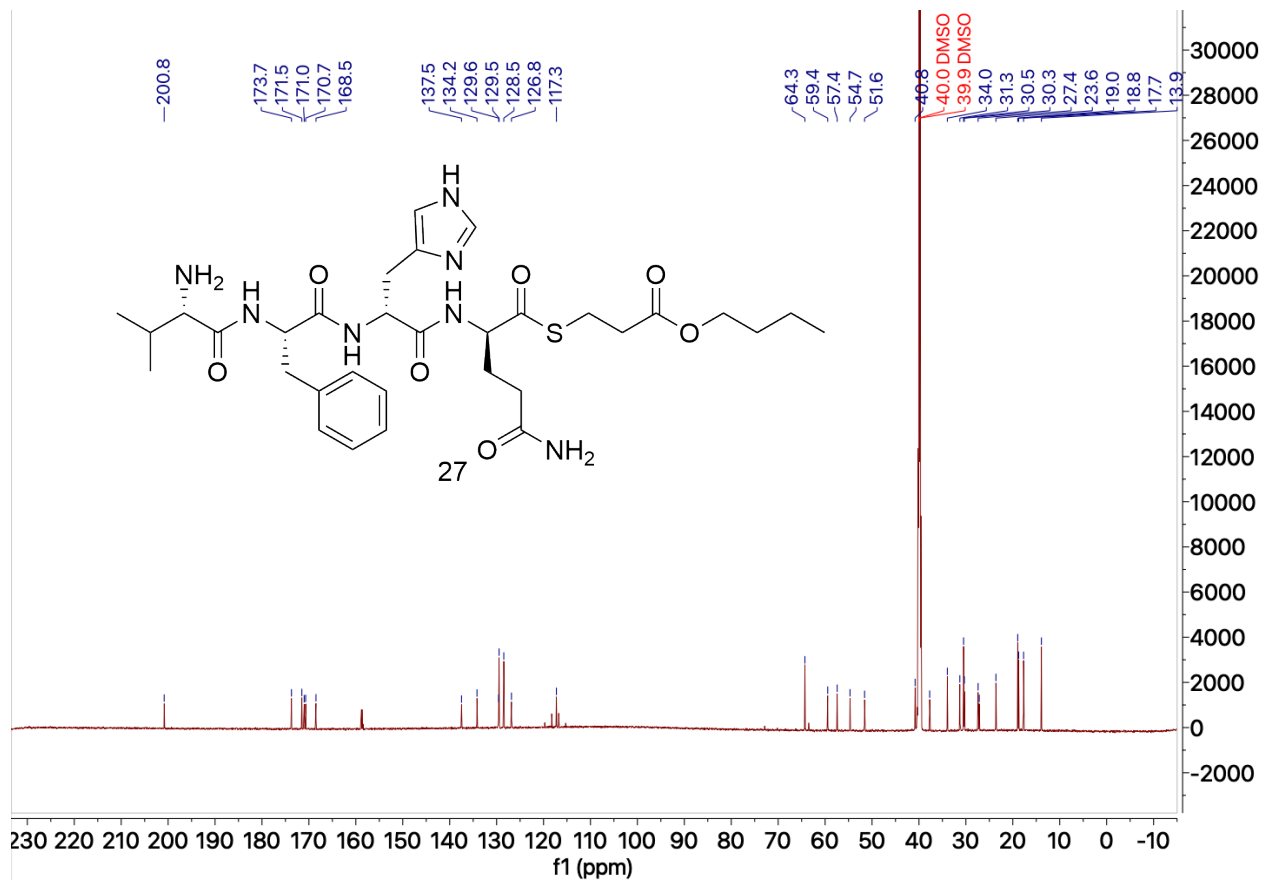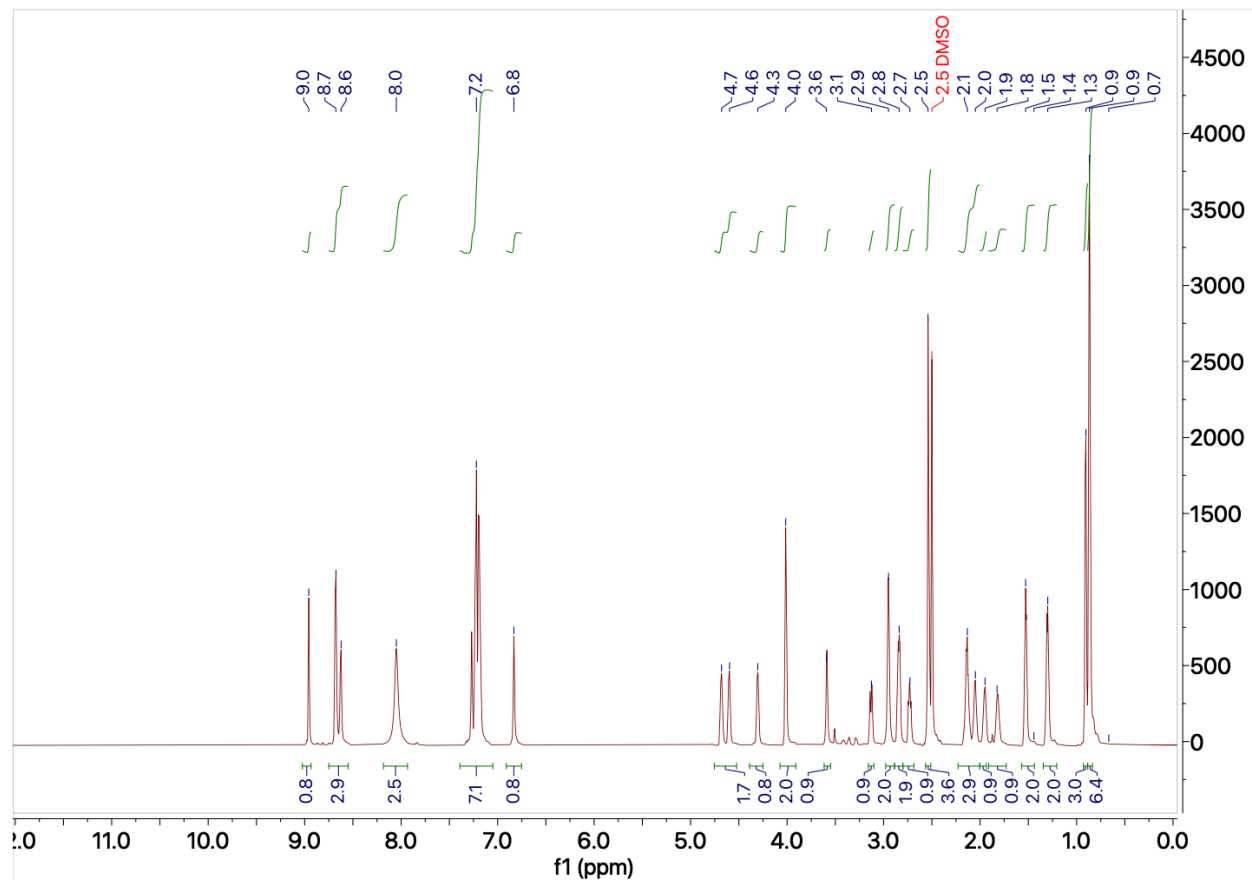

Supplementary Fig. 102:  $^{13}\text{C}$  (201 MHz) and  $^1\text{H}$  (800 MHz) NMR spectrum of **27** in DMSO- $d_6$

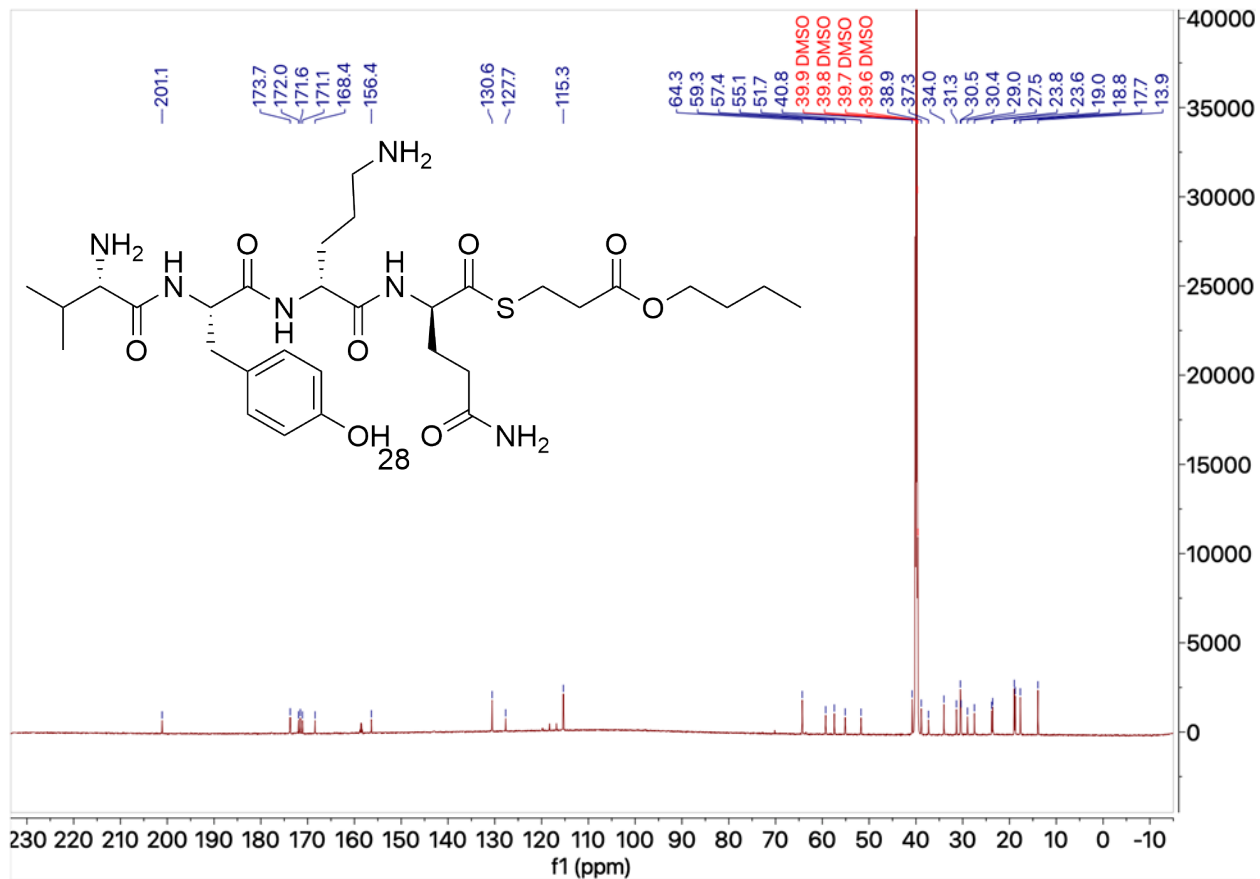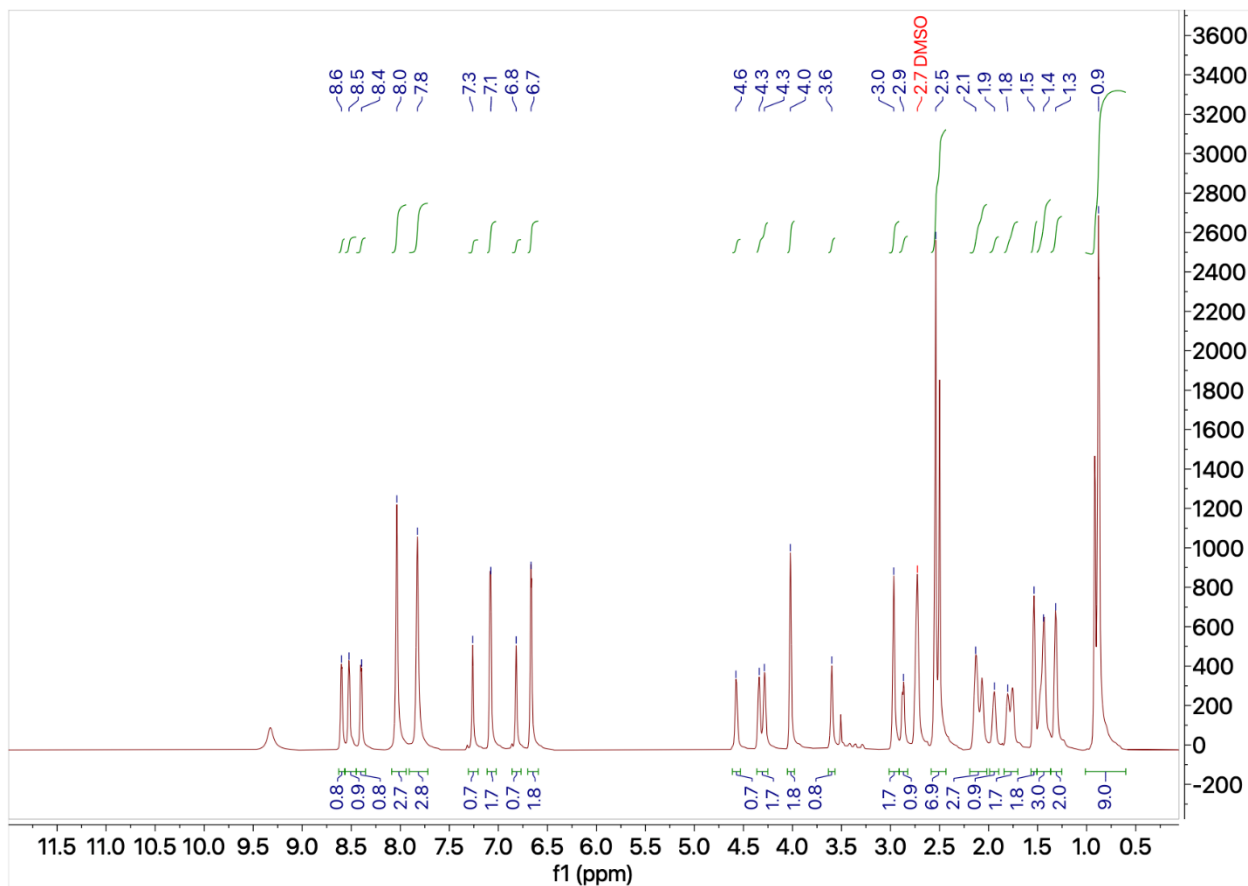

Supplementary Fig. 103: <sup>13</sup>C (201 MHz) and <sup>1</sup>H (800 MHz) NMR spectrum of **28** in DMSO-d<sub>6</sub>

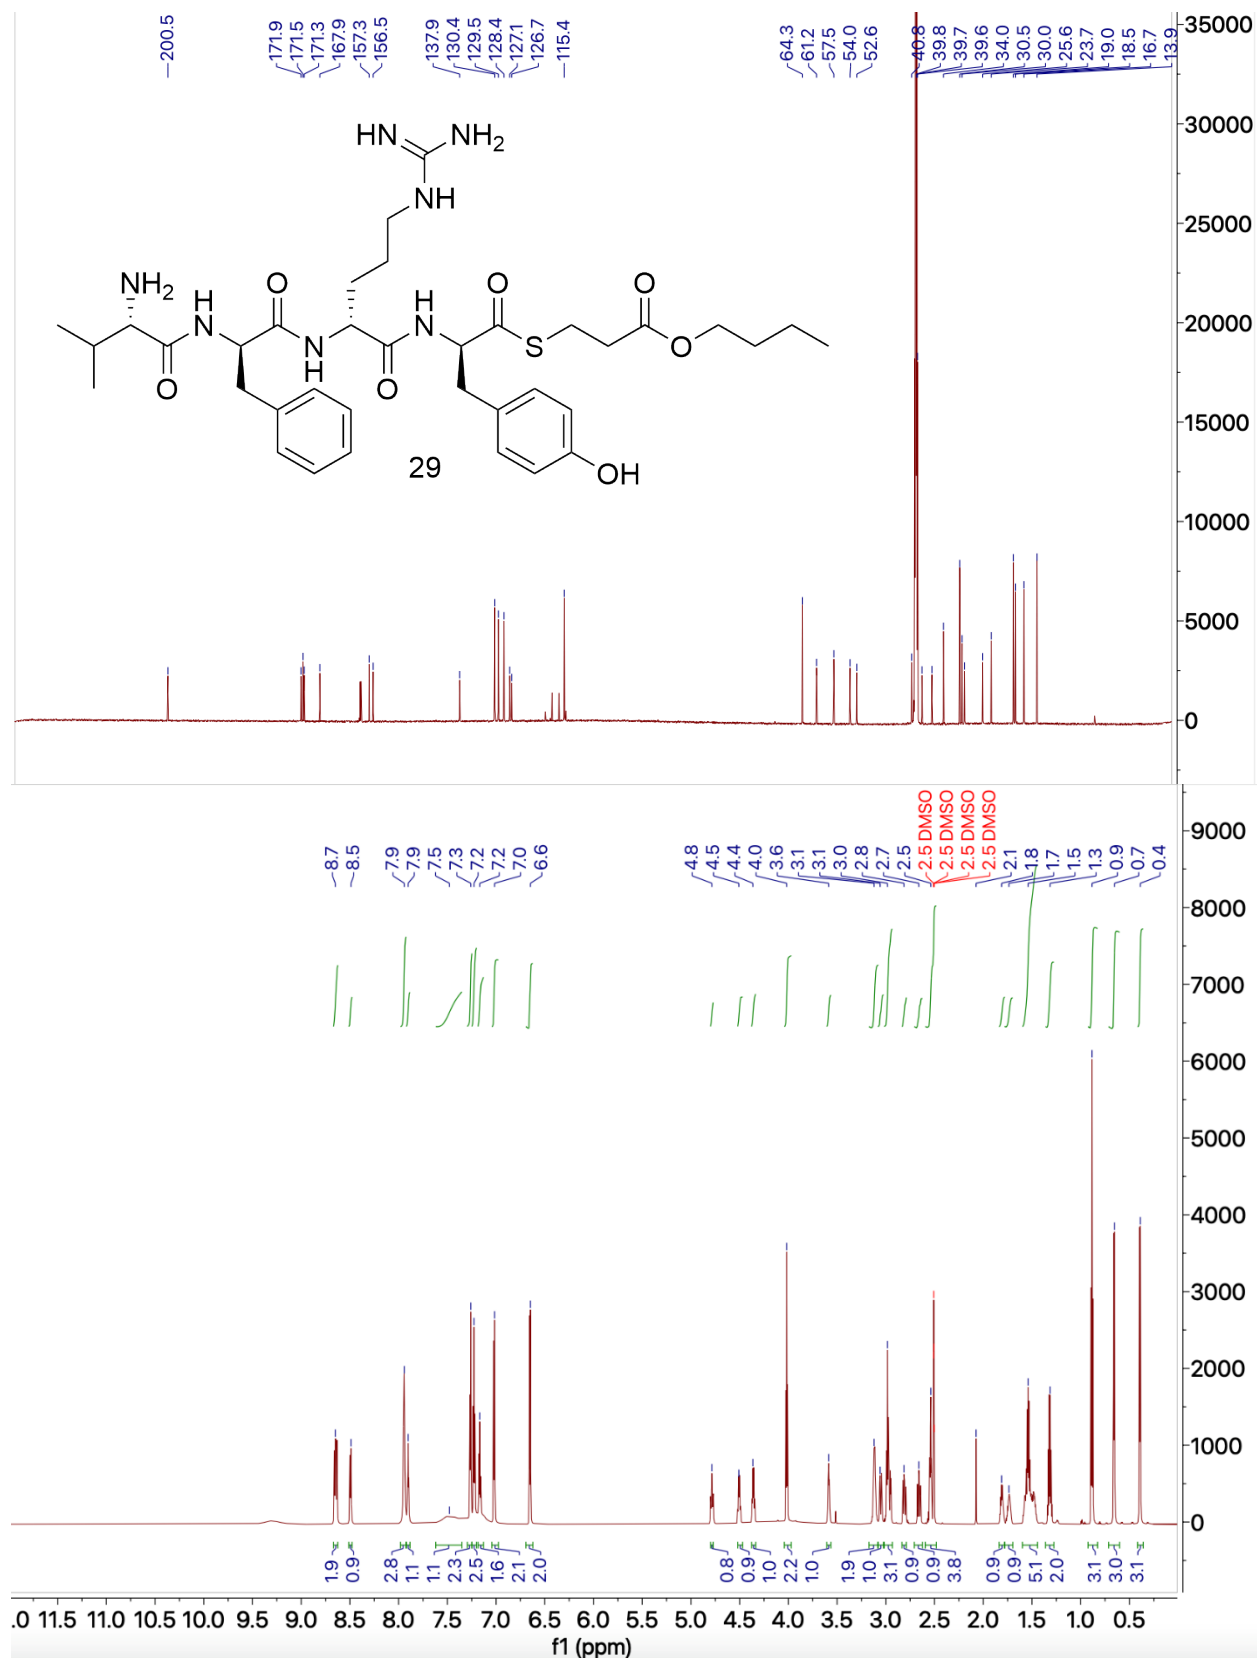

Supplementary Fig. 104: 13C (201 MHz) and 1H (800 MHz) NMR spectrum of **29** in DMSO-d6



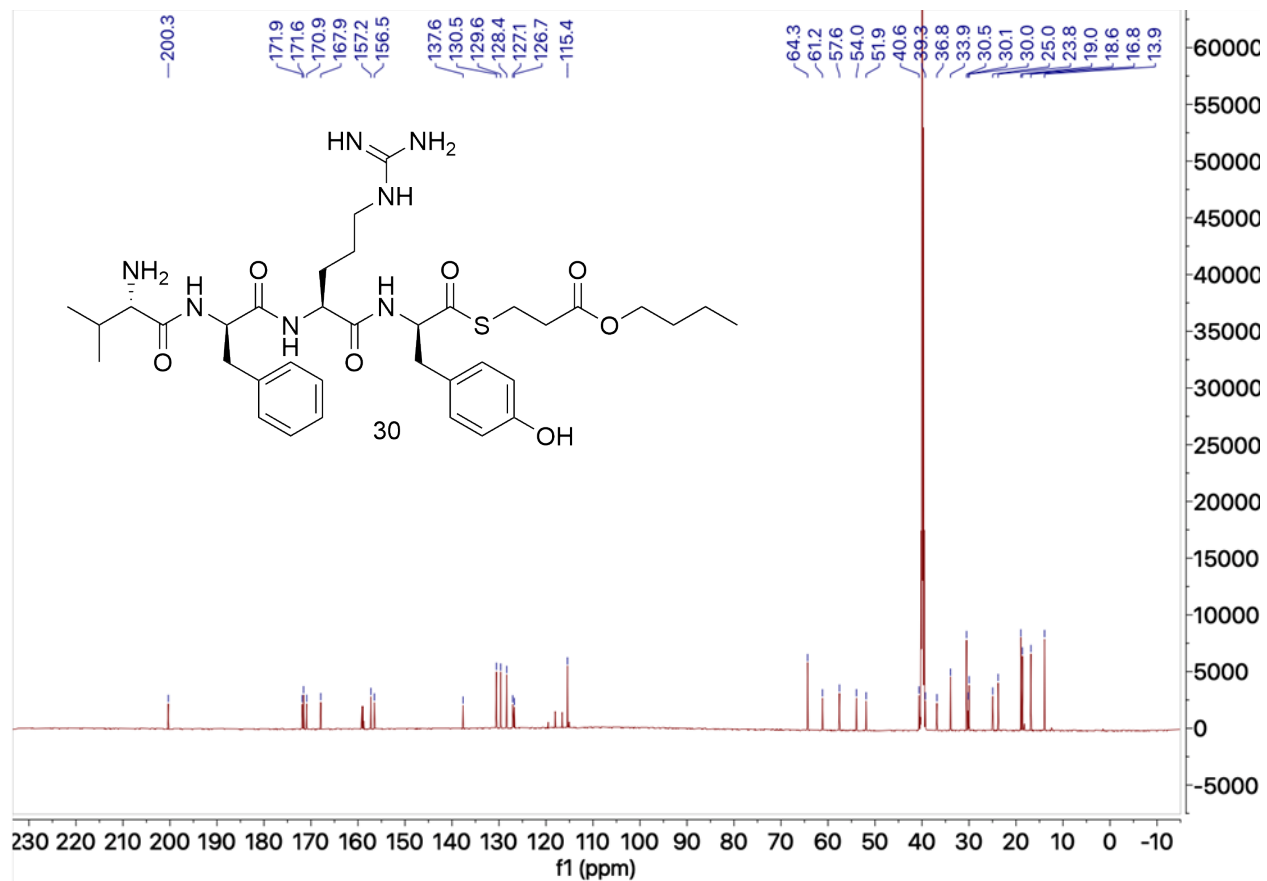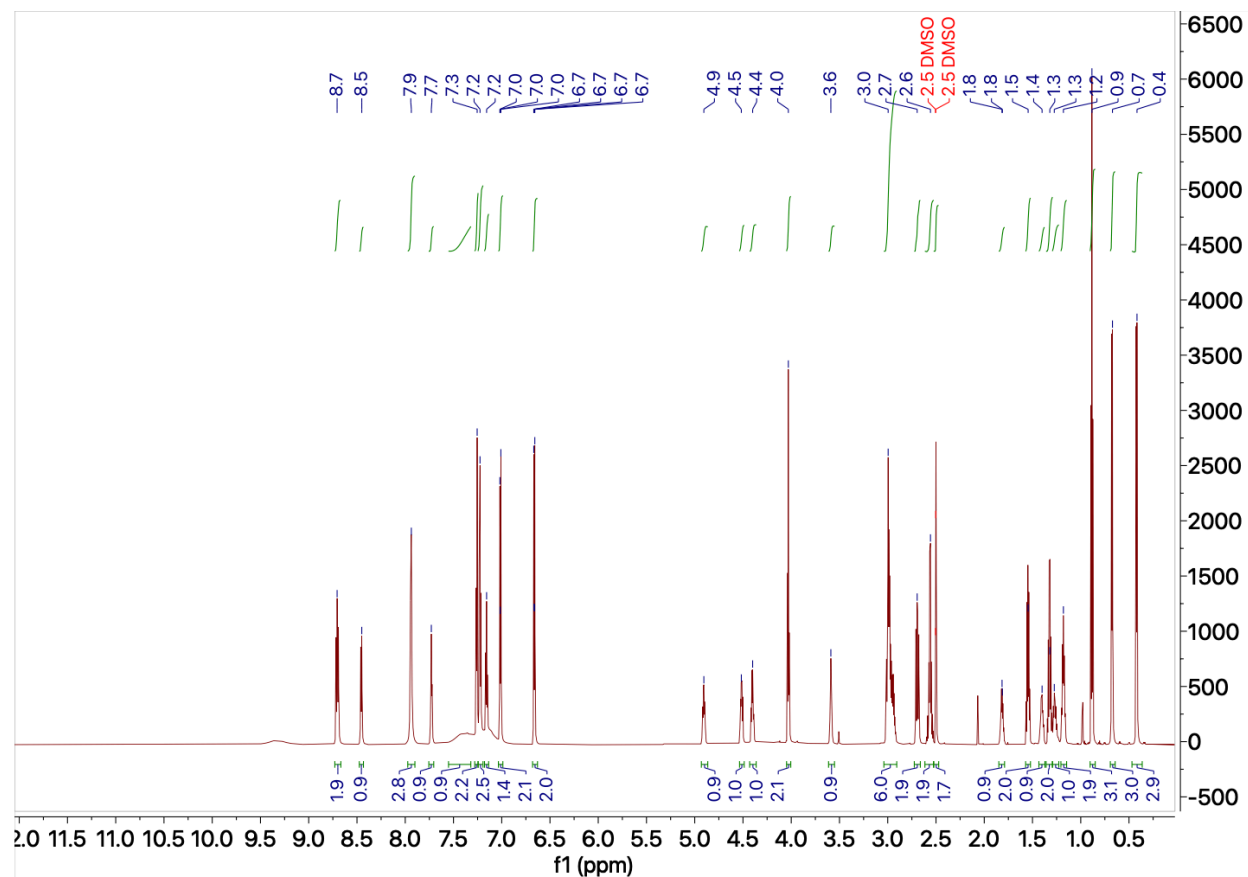

Supplementary Fig. 105: <sup>13</sup>C (201 MHz) and <sup>1</sup>H (800 MHz) NMR spectrum of **30** in DMSO-d<sub>6</sub>

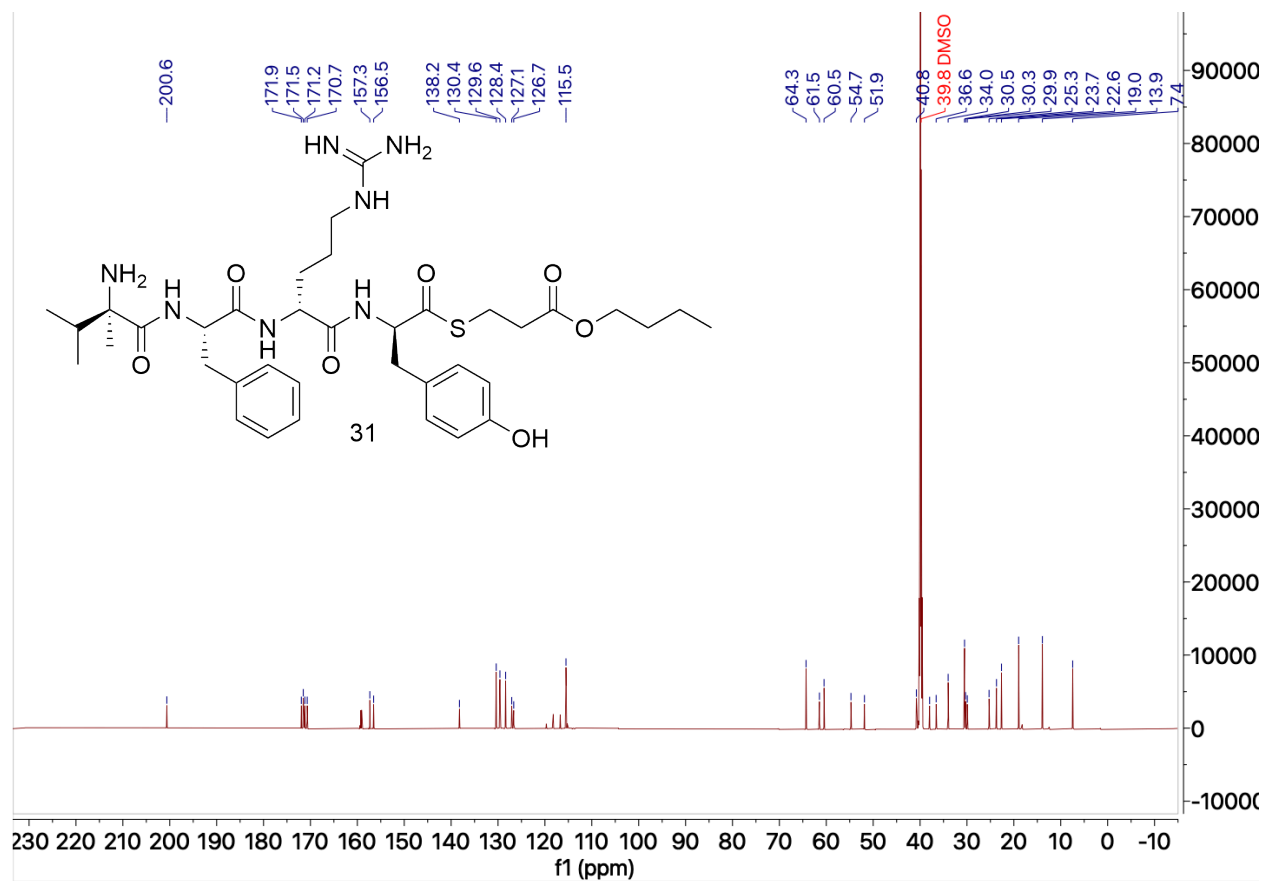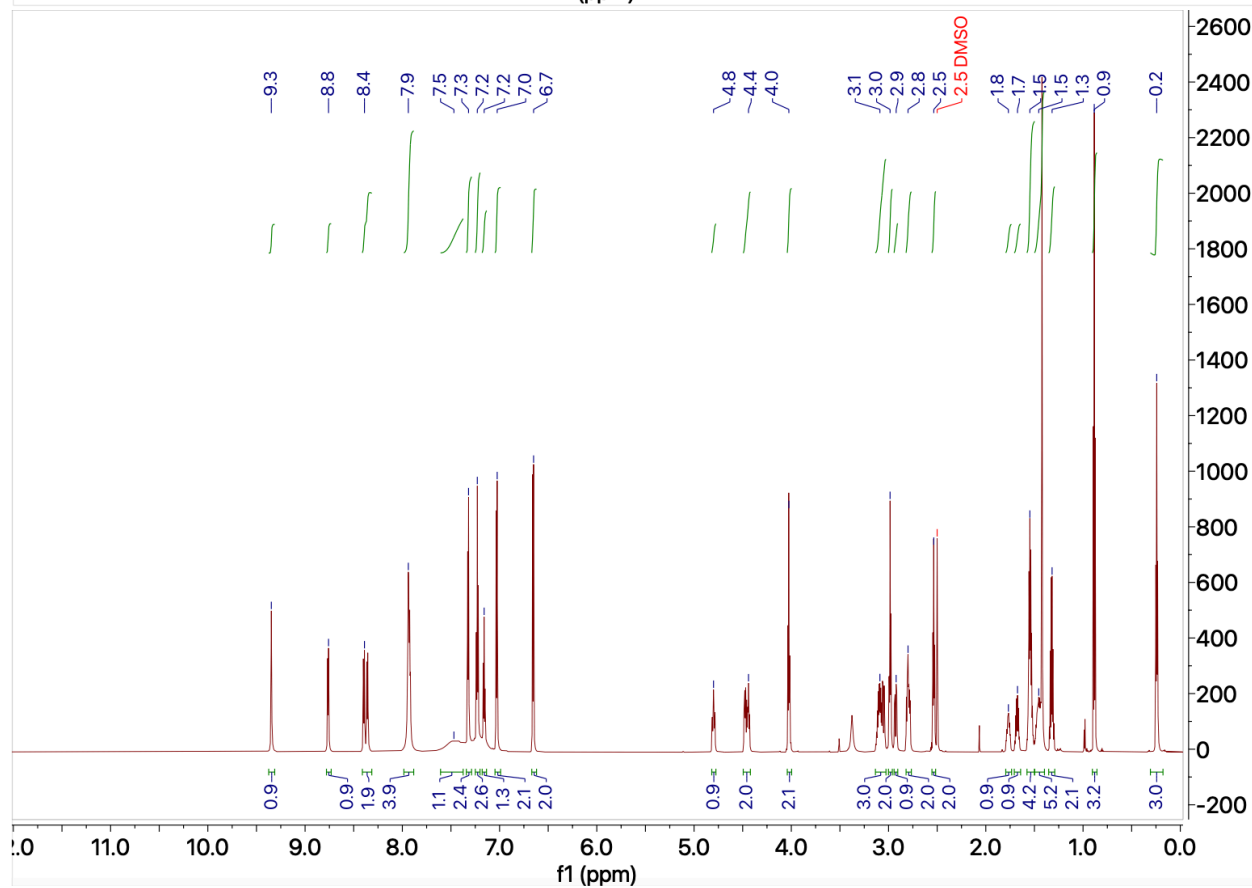

Supplementary Fig. 106: <sup>13</sup>C (201 MHz) and <sup>1</sup>H (800 MHz) NMR spectrum of **31** in DMSO-d<sub>6</sub>

## References

1. Matsuda, K. *et al.* Heterochiral coupling in non-ribosomal peptide macrolactamization. *Nat. Catal.* **3**, 507–515 (2020).
2. Hostetler, M. A. *et al.* Synthetic Natural Product Inspired Cyclic Peptides. *ACS Chem. Biol.* **16**, 2604–2611 (2021).
